# Supplementary material
Source: publisher figshare collection journal article supplement (https://gsajournals.figshare.com/ndownloader/files/27965712)
Supplement: Supplementary file 1 [file 27965712]

## Sheet: Ecoli
Table S2. Results of the comparison of E. coli K-12 substr. MG1655 with an artificial genome of the same strain containing 100 IS30 random insertions, using different surroundingLen values.
TP	TP*	FP	FP*	FN	FN*	Stats	ID	Location	ID1	SurroundingLen	ISCompare.ID	ISID	ISstart	ISend	Query.ID1	Start1	End1	Query.ID2	Start2	End2	REF.ID1	REF.Start1	REF.End1	REF.ID2	REF.Start2	REF.End2	Description	Observations	IS_Match_Type	QUERY_Flank1.locus_tag	QUERY_Flank1.Product	QUERY_Flank2.locus_tag	QUERY_Flank2.Product	REF_Flank1.locus_tag	REF.Product_Flank1	REF_Flank2.locus_tag	REF.Product_Flank2	Scaffold_Size
1	1						1	446	1	100	0	IS30_IS30	446	1666.0	NC_000913.3_art_ISs	345.0	445.0		1667.0	1767.0	NC_000913.3	345.0				546.0	IS only present in query Strain.	1. DLIS	Complete IS hit.	-	Intergenic/Pseudo/Repeaed Region	-	Intergenic/Pseudo/Repeaed Region	b0002	fused aspartate kinase/homoserine dehydrogenase 1	b0002	fused aspartate kinase/homoserine dehydrogenase 1	4763752.0
1	1						2	3160	2	100	1	IS30_IS30	3160	4380.0	NC_000913.3_art_ISs	3059.0	3159.0		4381.0	4481.0	NC_000913.3	1838.0				2039.0	IS only present in query Strain.	1. DLIS	Complete IS hit.	-	Intergenic/Pseudo/Repeaed Region	-	Intergenic/Pseudo/Repeaed Region	b0002	fused aspartate kinase/homoserine dehydrogenase 1	b0002	fused aspartate kinase/homoserine dehydrogenase 1	4763752.0
1	1						3	123711	3	100	2	IS30_IS30	123711	124931.0	NC_000913.3_art_ISs	123610.0	123710.0		124932.0	125032.0	NC_000913.3	121168.0				121369.0	IS only present in query Strain.	1. DLIS	Complete IS hit.	-	Intergenic/Pseudo/Repeaed Region	-	Intergenic/Pseudo/Repeaed Region	b0112	aromatic amino acid:H(+) symporter AroP	b0112	aromatic amino acid:H(+) symporter AroP	4763752.0
1	1						4	142989	4	100	3	IS30_IS30	142989	144209.0	NC_000913.3_art_ISs	142888.0	142988.0		144210.0	144310.0	NC_000913.3	139225.0				139426.0	IS only present in query Strain.	1. DLIS	Complete IS hit.	-	Intergenic/Pseudo/Repeaed Region	-	Intergenic/Pseudo/Repeaed Region	b0124	quinoprotein glucose dehydrogenase	b0124	quinoprotein glucose dehydrogenase	4763752.0
1	1						5	163498	5	100	4	IS30_IS30	163498	164718.0	NC_000913.3_art_ISs	163397.0	163497.0		164719.0	164819.0	NC_000913.3	158513.0				158714.0	IS only present in query Strain.	1. DLIS	Complete IS hit.	-	Intergenic/Pseudo/Repeaed Region	-	Intergenic/Pseudo/Repeaed Region	b0143	poly(A) polymerase I	b0143	poly(A) polymerase I	4763752.0
1	1						6	240046	6	100	7	IS30_IS30	240046	241266.0	NC_000913.3_art_ISs	239945.0	240045.0		241267.0	241367.0	NC_000913.3	233840.0				234041.0	IS only present in query Strain.	1. DLIS	Complete IS hit.	-	Intergenic/Pseudo/Repeaed Region	b0212	hydroxyacylglutathione hydrolase GloB	b0211	membrane-bound lytic murein transglycosylase D	b0212	hydroxyacylglutathione hydrolase GloB	4763752.0
				1	1		7	248381	7	100
	1			1			8	248480	8	100	95	IS30_IS30	248480	249700.0	NC_000913.3_art_ISs	248379.0	248479.0		249701.0	249801.0	NC_000913.3	270540.0				270740.0	IS only present in query Strain.	2. Verify manually, possible false positive caused by consecutive ISs.	Complete IS hit.	-	Intergenic/Pseudo/Repeaed Region	-	Intergenic/Pseudo/Repeaed Region	b4587	CP4-6 prophage; IS911A regulator fragment	b0256	IS30 transposase	4763752.0
1	1						9	310515	9	100	8	IS30_IS30	310515	311735.0	NC_000913.3_art_ISs	310414.0	310514.0		311736.0	311836.0	NC_000913.3	300646.0				300847.0	IS only present in query Strain.	1. DLIS	Complete IS hit.	-	Intergenic/Pseudo/Repeaed Region	-	Intergenic/Pseudo/Repeaed Region	b0284	aldehyde dehydrogenase: molybdenum cofactor-binding subunit	b0284	aldehyde dehydrogenase: molybdenum cofactor-binding subunit	4763752.0
1	1						10	315801	10	100	9	IS30_IS30	315801	317021.0	NC_000913.3_art_ISs	315700.0	315800.0		317022.0	317122.0	NC_000913.3	304711.0				304912.0	IS only present in query Strain.	1. DLIS	Complete IS hit.	-	Intergenic/Pseudo/Repeaed Region	-	Intergenic/Pseudo/Repeaed Region	b0289	putative fimbrial chaperone EcpE	b0289	putative fimbrial chaperone EcpE	4763752.0
1	1						11	333734	11	100	10	IS30_IS30	333734	334954.0	NC_000913.3_art_ISs	333633.0	333733.0		334955.0	335055.0	NC_000913.3	321423.0				321624.0	IS only present in query Strain.	1. DLIS	Complete IS hit.	-	Intergenic/Pseudo/Repeaed Region	b0306	putative lactate utilization oxidoreductase YkgE	-	Intergenic/Pseudo/Repeaed Region	b0306	putative lactate utilization oxidoreductase YkgE	4763752.0
1	1						12	356194	12	100	11	IS30_IS30	356194	357414.0	NC_000913.3_art_ISs	356093.0	356193.0		357415.0	357515.0	NC_000913.3	342662.0				342863.0	IS only present in query Strain.	1. DLIS	Complete IS hit.	-	Intergenic/Pseudo/Repeaed Region	-	Intergenic/Pseudo/Repeaed Region	-	Intergenic/Pseudo/Repeaed Region	-	Intergenic/Pseudo/Repeaed Region	4763752.0
1	1						13	361260	13	100	12	IS30_IS30	361260	362480.0	NC_000913.3_art_ISs	361159.0	361259.0		362481.0	362581.0	NC_000913.3	346507.0				346708.0	IS only present in query Strain.	1. DLIS	Complete IS hit.	-	Intergenic/Pseudo/Repeaed Region	-	Intergenic/Pseudo/Repeaed Region	b0329	DUF1471 domain-containing protein YahO	b0329	DUF1471 domain-containing protein YahO	4763752.0
1	1						14	395877	14	100	13	IS30_IS30	395877	397097.0	NC_000913.3_art_ISs	395776.0	395876.0		397098.0	397198.0	NC_000913.3	379903.0				380104.0	IS only present in query Strain.	1. DLIS	Complete IS hit.	-	Intergenic/Pseudo/Repeaed Region	b0358	outer membrane protein YaiO	-	Intergenic/Pseudo/Repeaed Region	b0358	outer membrane protein YaiO	4763752.0
1	1						15	398612	15	100	14	IS30_IS30	398612	399832.0	NC_000913.3_art_ISs	398511.0	398611.0		399833.0	399933.0	NC_000913.3	381417.0				381618.0	IS only present in query Strain.	1. DLIS	Complete IS hit.	-	Intergenic/Pseudo/Repeaed Region	-	Intergenic/Pseudo/Repeaed Region	b0360	IS2 element protein InsA	b0360	IS2 element protein InsA	4763752.0
1	1						16	458588	16	100	15	IS30_IS30	458588	459808.0	NC_000913.3_art_ISs	458487.0	458587.0		459809.0	459909.0	NC_000913.3	440172.0				440373.0	IS only present in query Strain.	1. DLIS	Complete IS hit.	b0420	1-deoxy-D-xylulose-5-phosphate synthase	-	Intergenic/Pseudo/Repeaed Region	b0420	1-deoxy-D-xylulose-5-phosphate synthase	b0421	geranyl diphosphate/farnesyl diphosphate synthase	4763752.0
1	1						17	515332	17	100	16	IS30_IS30	515332	516552.0	NC_000913.3_art_ISs	515231.0	515331.0		516553.0	516653.0	NC_000913.3	495695.0				495896.0	IS only present in query Strain.	1. DLIS	Complete IS hit.	-	Intergenic/Pseudo/Repeaed Region	-	Intergenic/Pseudo/Repeaed Region	b0473	chaperone protein HtpG	b0473	chaperone protein HtpG	4763752.0
1	1						18	518331	18	100	17	IS30_IS30	518331	519551.0	NC_000913.3_art_ISs	518230.0	518330.0		519552.0	519652.0	NC_000913.3	497473.0				497674.0	IS only present in query Strain.	1. DLIS	Complete IS hit.	-	Intergenic/Pseudo/Repeaed Region	-	Intergenic/Pseudo/Repeaed Region	b0474	adenylate kinase	b0474	adenylate kinase	4763752.0
1	1						19	564278	19	100	18	IS30_IS30	564278	565498.0	NC_000913.3_art_ISs	564177.0	564277.0		565499.0	565599.0	NC_000913.3	542199.0				542400.0	IS only present in query Strain.	1. DLIS	Complete IS hit.	-	Intergenic/Pseudo/Repeaed Region	-	Intergenic/Pseudo/Repeaed Region	b0514	glycerate 2-kinase 2	b0514	glycerate 2-kinase 2	4763752.0
1	1						20	638410	20	100	19	IS30_IS30	638410	639630.0	NC_000913.3_art_ISs	638309.0	638409.0		639631.0	639731.0	NC_000913.3	615110.0				615311.0	IS only present in query Strain.	1. DLIS	Complete IS hit.	-	Intergenic/Pseudo/Repeaed Region	-	Intergenic/Pseudo/Repeaed Region	b0586	apo-serine activating enzyme	b0586	apo-serine activating enzyme	4763752.0
1	1						21	643571	21	100	20	IS30_IS30	643571	644791.0	NC_000913.3_art_ISs	643470.0	643570.0		644792.0	644892.0	NC_000913.3	619050.0				619251.0	IS only present in query Strain.	1. DLIS	Complete IS hit.	-	Intergenic/Pseudo/Repeaed Region	-	Intergenic/Pseudo/Repeaed Region	b0587	polysaccharide co-polymerase family protein FepE	b0587	polysaccharide co-polymerase family protein FepE	4763752.0
1	1						22	709250	22	100	21	IS30_IS30	709250	710470.0	NC_000913.3_art_ISs	709149.0	709249.0		710471.0	710571.0	NC_000913.3	683508.0				683709.0	IS only present in query Strain.	1. DLIS	Complete IS hit.	-	Intergenic/Pseudo/Repeaed Region	-	Intergenic/Pseudo/Repeaed Region	b0651	pyrimidine-specific ribonucleoside hydrolase RihA	b0651	pyrimidine-specific ribonucleoside hydrolase RihA	4763752.0
1	1						23	780879	23	100	22	IS30_IS30	780879	782099.0	NC_000913.3_art_ISs	780778.0	780878.0		782100.0	782200.0	NC_000913.3	753916.0				754117.0	IS only present in query Strain.	1. DLIS	Complete IS hit.	-	Intergenic/Pseudo/Repeaed Region	-	Intergenic/Pseudo/Repeaed Region	b0720	citrate synthase	b0720	citrate synthase	4763752.0
1	1						24	794533	24	100	23	IS30_IS30	794533	795753.0	NC_000913.3_art_ISs	794432.0	794532.0		795754.0	795854.0	NC_000913.3	766349.0				766550.0	IS only present in query Strain.	1. DLIS	Complete IS hit.	-	Intergenic/Pseudo/Repeaed Region	-	Intergenic/Pseudo/Repeaed Region	b0731	2-O-alpha-mannosyl-D-glycerate specific PTS enzyme II	b0731	2-O-alpha-mannosyl-D-glycerate specific PTS enzyme II	4763752.0
1	1						25	818746	25	100	24	IS30_IS30	818746	819966.0	NC_000913.3_art_ISs	818645.0	818745.0		819967.0	820067.0	NC_000913.3	789341.0				789542.0	IS only present in query Strain.	1. DLIS	Complete IS hit.	-	Intergenic/Pseudo/Repeaed Region	-	Intergenic/Pseudo/Repeaed Region	b0757	galactokinase	b0757	galactokinase	4763752.0
1	1						26	827842	26	100	25	IS30_IS30	827842	829062.0	NC_000913.3_art_ISs	827741.0	827841.0		829063.0	829163.0	NC_000913.3	797216.0				797417.0	IS only present in query Strain.	1. DLIS	Complete IS hit.	-	Intergenic/Pseudo/Repeaed Region	-	Intergenic/Pseudo/Repeaed Region	b0765	molybdate ABC transporter ATP binding subunit	b0765	molybdate ABC transporter ATP binding subunit	4763752.0
1	1						27	840349	27	100	26	IS30_IS30	840349	841569.0	NC_000913.3_art_ISs	840248.0	840348.0		841570.0	841670.0	NC_000913.3	808502.0				808703.0	IS only present in query Strain.	1. DLIS	Complete IS hit.	-	Intergenic/Pseudo/Repeaed Region	-	Intergenic/Pseudo/Repeaed Region	b0774	adenosylmethionine-8-amino-7-oxononanoate aminotransferase	b0774	adenosylmethionine-8-amino-7-oxononanoate aminotransferase	4763752.0
1	1						28	866245	28	100	27	IS30_IS30	866245	867465.0	NC_000913.3_art_ISs	866144.0	866244.0		867466.0	867566.0	NC_000913.3	833177.0				833378.0	IS only present in query Strain.	1. DLIS	Complete IS hit.	-	Intergenic/Pseudo/Repeaed Region	-	Intergenic/Pseudo/Repeaed Region	b0799	ATP-dependent DNA helicase DinG	b0799	ATP-dependent DNA helicase DinG	4763752.0
1	1						29	885800	29	100	28	IS30_IS30	885800	887020.0	NC_000913.3_art_ISs	885699.0	885799.0		887021.0	887121.0	NC_000913.3	851511.0				851712.0	IS only present in query Strain.	1. DLIS	Complete IS hit.	-	Intergenic/Pseudo/Repeaed Region	-	Intergenic/Pseudo/Repeaed Region	b0815	phosphoethanolamine transferase	b0815	phosphoethanolamine transferase	4763752.0
1	1						30	1054897	30	100	29	IS30_IS30	1054897	1056117.0	NC_000913.3_art_ISs	1054796.0	1054896.0		1056118.0	1056218.0	NC_000913.3	1019387.0				1019588.0	IS only present in query Strain.	1. DLIS	Complete IS hit.	-	Intergenic/Pseudo/Repeaed Region	-	Intergenic/Pseudo/Repeaed Region	b0957	outer membrane porin A	b0957	outer membrane porin A	4763752.0
1	1						31	1102873	31	100	30	IS30_IS30	1102873	1104093.0	NC_000913.3_art_ISs	1102772.0	1102872.0		1104094.0	1104194.0	NC_000913.3	1066142.0				1066343.0	IS only present in query Strain.	1. DLIS	Complete IS hit.	-	Intergenic/Pseudo/Repeaed Region	-	Intergenic/Pseudo/Repeaed Region	b1002	glucose-1-phosphatase	b1002	glucose-1-phosphatase	4763752.0
1	1						32	1118119	32	100	31	IS30_IS30	1118119	1119339.0	NC_000913.3_art_ISs	1118018.0	1118118.0		1119340.0	1119440.0	NC_000913.3	1080167.0				1080368.0	IS only present in query Strain.	1. DLIS	Complete IS hit.	-	Intergenic/Pseudo/Repeaed Region	-	Intergenic/Pseudo/Repeaed Region	b1015	proline:Na(+) symporter	b1015	proline:Na(+) symporter	4763752.0
1	1						33	1150109	33	100	32	IS30_IS30	1150109	1151329.0	NC_000913.3_art_ISs	1150008.0	1150108.0		1151330.0	1151430.0	NC_000913.3	1110936.0				1111137.0	IS only present in query Strain.	1. DLIS	Complete IS hit.	-	Intergenic/Pseudo/Repeaed Region	-	Intergenic/Pseudo/Repeaed Region	b1049	osmoregulated periplasmic glucans (OPGs) biosynthesis protein H	b1049	osmoregulated periplasmic glucans (OPGs) biosynthesis protein H	4763752.0
1	1						34	1165669	34	100	33	IS30_IS30	1165669	1166889.0	NC_000913.3_art_ISs	1165568.0	1165668.0		1166890.0	1166990.0	NC_000913.3	1125275.0				1125476.0	IS only present in query Strain.	1. DLIS	Complete IS hit.	b1065	multidrug efflux pump MdtH	-	Intergenic/Pseudo/Repeaed Region	b1065	multidrug efflux pump MdtH	-	Intergenic/Pseudo/Repeaed Region	4763752.0
1	1						35	1252656	35	100	34	IS30_IS30	1252656	1253876.0	NC_000913.3_art_ISs	1252555.0	1252655.0		1253877.0	1253977.0	NC_000913.3	1211041.0				1211242.0	IS only present in query Strain.	1. DLIS	Complete IS hit.	-	Intergenic/Pseudo/Repeaed Region	-	Intergenic/Pseudo/Repeaed Region	b1159	e14 prophage; 5-methylcytosine-specific restriction enzyme McrA	-	Intergenic/Pseudo/Repeaed Region	4763752.0
1	1						36	1314729	36	100	35	IS30_IS30	1314729	1315949.0	NC_000913.3_art_ISs	1314628.0	1314728.0		1315950.0	1316050.0	NC_000913.3	1271893.0				1272094.0	IS only present in query Strain.	1. DLIS	Complete IS hit.	-	Intergenic/Pseudo/Repeaed Region	-	Intergenic/Pseudo/Repeaed Region	-	Intergenic/Pseudo/Repeaed Region	-	Intergenic/Pseudo/Repeaed Region	4763752.0
1	1						37	1316873	37	100	36	IS30_IS30	1316873	1318093.0	NC_000913.3_art_ISs	1316772.0	1316872.0		1318094.0	1318194.0	NC_000913.3	1272816.0				1273017.0	IS only present in query Strain.	1. DLIS	Complete IS hit.	-	Intergenic/Pseudo/Repeaed Region	-	Intergenic/Pseudo/Repeaed Region	b1218	glutathione-specific gamma-glutamylcyclotransferase	b1218	glutathione-specific gamma-glutamylcyclotransferase	4763752.0
1	1						38	1332696	38	100	37	IS30_IS30	1332696	1333916.0	NC_000913.3_art_ISs	1332595.0	1332695.0		1333917.0	1334017.0	NC_000913.3	1287121.0				1287325.0	IS only present in query Strain.	1. DLIS	Complete IS hit.	-	Intergenic/Pseudo/Repeaed Region	-	Intergenic/Pseudo/Repeaed Region	b1229	protamine-like protein	-	Intergenic/Pseudo/Repeaed Region	4763752.0
1	1						39	1477755	39	100	40	IS30_IS30	1477755	1478975.0	NC_000913.3_art_ISs	1477654.0	1477754.0		1478976.0	1479076.0	NC_000913.3	1431256.0				1431457.0	IS only present in query Strain.	1. DLIS	Complete IS hit.	-	Intergenic/Pseudo/Repeaed Region	-	Intergenic/Pseudo/Repeaed Region	b1372	Rac prophage; putative membrane protein	b1372	Rac prophage; putative membrane protein	4763752.0
1	1						40	1530090	40	100	41	IS30_IS30	1530090	1531310.0	NC_000913.3_art_ISs	1529989.0	1530089.0		1531311.0	1531411.0	NC_000913.3	1482370.0				1482571.0	IS only present in query Strain.	1. DLIS	Complete IS hit.	-	Intergenic/Pseudo/Repeaed Region	-	Intergenic/Pseudo/Repeaed Region	b1412	FMN dependent NADH:quinone oxidoreductase	b1412	FMN dependent NADH:quinone oxidoreductase	4763752.0
1	1						41	1599338	41	100	42	IS30_IS30	1599338	1600558.0	NC_000913.3_art_ISs	1599237.0	1599337.0		1600559.0	1600659.0	NC_000913.3	1550397.0				1550598.0	IS only present in query Strain.	1. DLIS	Complete IS hit.	b1474	formate dehydrogenase N subunit alpha	-	Intergenic/Pseudo/Repeaed Region	b1474	formate dehydrogenase N subunit alpha	b1475	formate dehydrogenase N subunit beta	4763752.0
1	1						42	1601001	42	100	43	IS30_IS30	1601001	1602221.0	NC_000913.3_art_ISs	1600900.0	1601000.0		1602222.0	1602322.0	NC_000913.3	1550839.0				1551040.0	IS only present in query Strain.	1. DLIS	Complete IS hit.	-	Intergenic/Pseudo/Repeaed Region	-	Intergenic/Pseudo/Repeaed Region	b1475	formate dehydrogenase N subunit beta	b1475	formate dehydrogenase N subunit beta	4763752.0
1	1						43	1614176	43	100	44	IS30_IS30	1614176	1615396.0	NC_000913.3_art_ISs	1614075.0	1614175.0		1615397.0	1615497.0	NC_000913.3	1562793.0				1562994.0	IS only present in query Strain.	1. DLIS	Complete IS hit.	-	Intergenic/Pseudo/Repeaed Region	-	Intergenic/Pseudo/Repeaed Region	b1488	D-alanyl-D-alanine dipeptidase	b1488	D-alanyl-D-alanine dipeptidase	4763752.0
1	1						44	1700984	44	100	45	IS30_IS30	1700984	1702204.0	NC_000913.3_art_ISs	1700883.0	1700983.0		1702205.0	1702305.0	NC_000913.3	1648380.0				1648581.0	IS only present in query Strain.	1. DLIS	Complete IS hit.	-	Intergenic/Pseudo/Repeaed Region	b1571	Qin prophage; DUF1391 domain-containing protein YdfA	-	Intergenic/Pseudo/Repeaed Region	b1571	Qin prophage; DUF1391 domain-containing protein YdfA	4763752.0
1	1						45	1724977	45	100	46	IS30_IS30	1724977	1726197.0	NC_000913.3_art_ISs	1724876.0	1724976.0		1726198.0	1726298.0	NC_000913.3	1671152.0				1671353.0	IS only present in query Strain.	1. DLIS	Complete IS hit.	-	Intergenic/Pseudo/Repeaed Region	-	Intergenic/Pseudo/Repeaed Region	-	Intergenic/Pseudo/Repeaed Region	-	Intergenic/Pseudo/Repeaed Region	4763752.0
1	1						46	1739082	46	100	47	IS30_IS30	1739082	1740302.0	NC_000913.3_art_ISs	1738981.0	1739081.0		1740303.0	1740403.0	NC_000913.3	1684036.0				1684237.0	IS only present in query Strain.	1. DLIS	Complete IS hit.	-	Intergenic/Pseudo/Repeaed Region	-	Intergenic/Pseudo/Repeaed Region	b1609	sensory histidine kinase RstB	-	Intergenic/Pseudo/Repeaed Region	4763752.0
1	1						47	1744580	47	100	48	IS30_IS30	1744580	1745800.0	NC_000913.3_art_ISs	1744479.0	1744579.0		1745801.0	1745901.0	NC_000913.3	1688313.0				1688514.0	IS only present in query Strain.	1. DLIS	Complete IS hit.	b1612	fumarase A	-	Intergenic/Pseudo/Repeaed Region	b1612	fumarase A	-	Intergenic/Pseudo/Repeaed Region	4763752.0
1	1						48	1763370	48	100	49	IS30_IS30	1763370	1764590.0	NC_000913.3_art_ISs	1763269.0	1763369.0		1764591.0	1764691.0	NC_000913.3	1705882.0				1706083.0	IS only present in query Strain.	1. DLIS	Complete IS hit.	-	Intergenic/Pseudo/Repeaed Region	-	Intergenic/Pseudo/Repeaed Region	b1627	SoxR [2Fe-2S] reducing system protein RsxA	b1627	SoxR [2Fe-2S] reducing system protein RsxA	4763752.0
1	1						49	1767126	49	100	50	IS30_IS30	1767126	1768346.0	NC_000913.3_art_ISs	1767025.0	1767125.0		1768347.0	1768447.0	NC_000913.3	1708417.0				1708618.0	IS only present in query Strain.	1. DLIS	Complete IS hit.	-	Intergenic/Pseudo/Repeaed Region	-	Intergenic/Pseudo/Repeaed Region	b1629	SoxR [2Fe-2S] reducing system protein RsxC	b1629	SoxR [2Fe-2S] reducing system protein RsxC	4763752.0
1	1						50	1803050	50	100	51	IS30_IS30	1803050	1804270.0	NC_000913.3_art_ISs	1802949.0	1803049.0		1804271.0	1804371.0	NC_000913.3	1743120.0				1743321.0	IS only present in query Strain.	1. DLIS	Complete IS hit.	-	Intergenic/Pseudo/Repeaed Region	-	Intergenic/Pseudo/Repeaed Region	b1662	riboflavin synthase	-	Intergenic/Pseudo/Repeaed Region	4763752.0
	1			1			51	1869279	51	100	99	IS30_IS30	1869279	1870499.0	NC_000913.3_art_ISs	1869178.0	1869278.0		1870500.0	1870600.0	NC_000913.3	1470436.0	1470522.0				IS only present in query Strain.	2. Verify manually, possible false positive caused by consecutive ISs.		-	Intergenic/Pseudo/Repeaed Region	-	Intergenic/Pseudo/Repeaed Region	b4492	putative outer membrane protein; N-terminal fragment	-	-	4763752.0
	1			1			52	1870520	52	100	100	IS30_IS30	1870520	1871740.0	NC_000913.3_art_ISs	1870419.0	1870519.0		1871741.0	1871841.0	NC_000913.3	1470436.0	1470521.0				IS only present in query Strain.	2. Verify manually, possible false positive caused by consecutive ISs.		-	Intergenic/Pseudo/Repeaed Region	-	Intergenic/Pseudo/Repeaed Region	b4492	putative outer membrane protein; N-terminal fragment	-	-	4763752.0
1	1						53	1904586	53	100	52	IS30_IS30	1904586	1905806.0	NC_000913.3_art_ISs	1904485.0	1904585.0		1905807.0	1905907.0	NC_000913.3	1840993.0				1841194.0	IS only present in query Strain.	1. DLIS	Complete IS hit.	-	Intergenic/Pseudo/Repeaed Region	-	Intergenic/Pseudo/Repeaed Region	b1758	putative phosphatidyl transferase; inner membrane protein	b1758	putative phosphatidyl transferase; inner membrane protein	4763752.0
1	1						54	1932848	54	100	53	IS30_IS30	1932848	1934068.0	NC_000913.3_art_ISs	1932747.0	1932847.0		1934069.0	1934169.0	NC_000913.3	1868034.0				1868235.0	IS only present in query Strain.	1. DLIS	Complete IS hit.	-	Intergenic/Pseudo/Repeaed Region	-	Intergenic/Pseudo/Repeaed Region	b1783	protein kinase YeaG	b1783	protein kinase YeaG	4763752.0
1	1						55	1937860	55	100	54	IS30_IS30	1937860	1939080.0	NC_000913.3_art_ISs	1937759.0	1937859.0		1939081.0	1939181.0	NC_000913.3	1871825.0				1872026.0	IS only present in query Strain.	1. DLIS	Complete IS hit.	b1785	putative c-di-GMP binding protein CdgI	-	Intergenic/Pseudo/Repeaed Region	b1785	putative c-di-GMP binding protein CdgI	-	Intergenic/Pseudo/Repeaed Region	4763752.0
1	1						56	2146825	56	100	55	IS30_IS30	2146825	2148045.0	NC_000913.3_art_ISs	2146724.0	2146824.0		2148046.0	2148146.0	NC_000913.3	2079569.0				2079770.0	IS only present in query Strain.	1. DLIS	Complete IS hit.	-	Intergenic/Pseudo/Repeaed Region	-	Intergenic/Pseudo/Repeaed Region	b2008	putative transporter YeeA	b2008	putative transporter YeeA	4763752.0
1	1						57	2291220	57	100	56	IS30_IS30	2291220	2292440.0	NC_000913.3_art_ISs	2291119.0	2291219.0		2292441.0	2292541.0	NC_000913.3	2222743.0				2222944.0	IS only present in query Strain.	1. DLIS	Complete IS hit.	-	Intergenic/Pseudo/Repeaed Region	-	Intergenic/Pseudo/Repeaed Region	b2133	D-lactate dehydrogenase	b2133	D-lactate dehydrogenase	4763752.0
1	1						58	2302324	58	100	57	IS30_IS30	2302324	2303544.0	NC_000913.3_art_ISs	2302223.0	2302323.0		2303545.0	2303645.0	NC_000913.3	2232626.0				2232827.0	IS only present in query Strain.	1. DLIS	Complete IS hit.	-	Intergenic/Pseudo/Repeaed Region	-	Intergenic/Pseudo/Repeaed Region	b2143	cytidine/deoxycytidine deaminase	-	Intergenic/Pseudo/Repeaed Region	4763752.0
1	1						59	2305151	59	100	58	IS30_IS30	2305151	2306371.0	NC_000913.3_art_ISs	2305050.0	2305150.0		2306372.0	2306472.0	NC_000913.3	2234232.0				2234433.0	IS only present in query Strain.	1. DLIS	Complete IS hit.	-	Intergenic/Pseudo/Repeaed Region	-	Intergenic/Pseudo/Repeaed Region	b2146	NAD-dependent dihydropyrimidine dehydrogenase subunit PreT	b2146	NAD-dependent dihydropyrimidine dehydrogenase subunit PreT	4763752.0
	1			1			60	2314302	60	100	101	IS30_IS30	2314302	2315125.0	NC_000913.3_art_ISs	2314201.0	2314301.0		2315126.0	2315226.0							IS only present in query Strain.	2. Verify manually, possible false positive caused by consecutive ISs.	Partial IS hit.	-	Intergenic/Pseudo/Repeaed Region	-	Intergenic/Pseudo/Repeaed Region	-	-	-	-	4763752.0
	1			1			61	2315125	61	100	112	IS30_IS30	2315125	2315756.0	NC_000913.3_art_ISs	2315024.0	2315124.0		2315757.0	2315857.0	NC_000913.3	280011.0	280113.0		270938.0	271039.0	IS only present in query Strain.	4. Verify manually, possible false positive produced by repeated sequences [Different QIFs match with same region].	Partial IS hit.	-	Intergenic/Pseudo/Repeaed Region	-	Intergenic/Pseudo/Repeaed Region	-	Intergenic/Pseudo/Repeaed Region	-	-	4763752.0
	1			1			62	2315757	62	100	102	IS30_IS30	2315757	2316977.0	NC_000913.3_art_ISs	2315656.0	2315756.0		2316978.0	2317078.0	NC_000913.3	271072.0				271273.0	IS only present in query Strain.	2. Verify manually, possible false positive caused by consecutive ISs.	Complete IS hit.	-	Intergenic/Pseudo/Repeaed Region	-	Intergenic/Pseudo/Repeaed Region	b0256	IS30 transposase	b0256	IS30 transposase	4763752.0
1	1						63	2331004	63	100	59	IS30_IS30	2331004	2332224.0	NC_000913.3_art_ISs	2330903.0	2331003.0		2332225.0	2332325.0	NC_000913.3	2255201.0				2255402.0	IS only present in query Strain.	1. DLIS	Complete IS hit.	-	Intergenic/Pseudo/Repeaed Region	b2163	putative DNA-binding transcriptional regulator YeiL	-	Intergenic/Pseudo/Repeaed Region	b2163	putative DNA-binding transcriptional regulator YeiL	4763752.0
1	1						64	2338335	64	100	60	IS30_IS30	2338335	2339555.0	NC_000913.3_art_ISs	2338234.0	2338334.0		2339556.0	2339656.0	NC_000913.3	2261311.0				2261512.0	IS only present in query Strain.	1. DLIS	Complete IS hit.	b2167	fructose-specific PTS multiphosphoryl transfer protein FruA	b2168	1-phosphofructokinase	b2167	fructose-specific PTS multiphosphoryl transfer protein FruA	b2168	1-phosphofructokinase	4763752.0
1	1						65	2415048	65	100	61	IS30_IS30	2415048	2416268.0	NC_000913.3_art_ISs	2414947.0	2415047.0		2416269.0	2416369.0	NC_000913.3	2336803.0				2337004.0	IS only present in query Strain.	1. DLIS	Complete IS hit.	-	Intergenic/Pseudo/Repeaed Region	-	Intergenic/Pseudo/Repeaed Region	b2231	DNA gyrase subunit A	b2231	DNA gyrase subunit A	4763752.0
1	1						66	2462961	66	100	62	IS30_IS30	2462961	2464181.0	NC_000913.3_art_ISs	2462860.0	2462960.0		2464182.0	2464282.0	NC_000913.3	2383495.0				2383696.0	IS only present in query Strain.	1. DLIS	Complete IS hit.	-	Intergenic/Pseudo/Repeaed Region	-	Intergenic/Pseudo/Repeaed Region	b2269	protease ElaD	b2269	protease ElaD	4763752.0
1	1						67	2528130	67	100	63	IS30_IS30	2528130	2529350.0	NC_000913.3_art_ISs	2528029.0	2528129.0		2529351.0	2529451.0	NC_000913.3	2447443.0				2447644.0	IS only present in query Strain.	1. DLIS	Complete IS hit.	b2329	chorismate synthase	-	Intergenic/Pseudo/Repeaed Region	b2329	chorismate synthase	b2330	50S ribosomal subunit protein L3 N(5)-glutamine methyltransferase	4763752.0
1	1						68	2951446	68	100	64	IS30_IS30	2951446	2952666.0	NC_000913.3_art_ISs	2951345.0	2951445.0		2952667.0	2952767.0	NC_000913.3	2869538.0				2869739.0	IS only present in query Strain.	1. DLIS	Complete IS hit.	-	Intergenic/Pseudo/Repeaed Region	-	Intergenic/Pseudo/Repeaed Region	b2744	broad specificity 5'(3')-nucleotidase and polyphosphatase	b2744	broad specificity 5'(3')-nucleotidase and polyphosphatase	4763752.0
1	1						69	2954441	69	100	65	IS30_IS30	2954441	2955661.0	NC_000913.3_art_ISs	2954340.0	2954440.0		2955662.0	2955762.0	NC_000913.3	2871312.0				2871513.0	IS only present in query Strain.	1. DLIS	Complete IS hit.	-	Intergenic/Pseudo/Repeaed Region	-	Intergenic/Pseudo/Repeaed Region	b2746	2-C-methyl-D-erythritol 2;4-cyclodiphosphate synthase	b2746	2-C-methyl-D-erythritol 2;4-cyclodiphosphate synthase	4763752.0
1	1						70	2983613	70	100	66	IS30_IS30	2983613	2984833.0	NC_000913.3_art_ISs	2983512.0	2983612.0		2984834.0	2984934.0	NC_000913.3	2899263.0				2899464.0	IS only present in query Strain.	1. DLIS	Complete IS hit.	-	Intergenic/Pseudo/Repeaed Region	-	Intergenic/Pseudo/Repeaed Region	b4463	putative FAD-containing dehydrogenase	-	Intergenic/Pseudo/Repeaed Region	4763752.0
1	1						71	3057300	71	100	67	IS30_IS30	3057300	3058520.0	NC_000913.3_art_ISs	3057199.0	3057299.0		3058521.0	3058621.0	NC_000913.3	2971729.0				2971930.0	IS only present in query Strain.	1. DLIS	Complete IS hit.	-	Intergenic/Pseudo/Repeaed Region	-	Intergenic/Pseudo/Repeaed Region	b2834	putative NADP(H)-dependent aldo-keto reductase Tas	b2834	putative NADP(H)-dependent aldo-keto reductase Tas	4763752.0
1	1						72	3104435	72	100	68	IS30_IS30	3104435	3105655.0	NC_000913.3_art_ISs	3104334.0	3104434.0		3105656.0	3105756.0	NC_000913.3	3017643.0				3017844.0	IS only present in query Strain.	1. DLIS	Complete IS hit.	-	Intergenic/Pseudo/Repeaed Region	-	Intergenic/Pseudo/Repeaed Region	b2878	putative oxidoreductase; Fe-S subunit	b2878	putative oxidoreductase; Fe-S subunit	4763752.0
1	1						73	3137784	73	100	69	IS30_IS30	3137784	3139004.0	NC_000913.3_art_ISs	3137683.0	3137783.0		3139005.0	3139105.0	NC_000913.3	3049771.0				3049972.0	IS only present in query Strain.	1. DLIS	Complete IS hit.	-	Intergenic/Pseudo/Repeaed Region	-	Intergenic/Pseudo/Repeaed Region	b2905	aminomethyltransferase	b2905	aminomethyltransferase	4763752.0
1	1						74	3161238	74	100	70	IS30_IS30	3161238	3162458.0	NC_000913.3_art_ISs	3161137.0	3161237.0		3162459.0	3162559.0	NC_000913.3	3072004.0				3072205.0	IS only present in query Strain.	1. DLIS	Complete IS hit.	-	Intergenic/Pseudo/Repeaed Region	-	Intergenic/Pseudo/Repeaed Region	b2926	phosphoglycerate kinase	b2926	phosphoglycerate kinase	4763752.0
1	1						75	3226249	75	100	71	IS30_IS30	3226249	3227469.0	NC_000913.3_art_ISs	3226148.0	3226248.0		3227470.0	3227570.0	NC_000913.3	3135794.0				3135995.0	IS only present in query Strain.	1. DLIS	Complete IS hit.	-	Intergenic/Pseudo/Repeaed Region	-	Intergenic/Pseudo/Repeaed Region	b2987	metal phosphate:H(+) symporter PitB	b2987	metal phosphate:H(+) symporter PitB	4763752.0
1	1						76	3361527	76	100	72	IS30_IS30	3361527	3362747.0	NC_000913.3_art_ISs	3361426.0	3361526.0		3362748.0	3362848.0	NC_000913.3	3269851.0				3270052.0	IS only present in query Strain.	1. DLIS	Complete IS hit.	-	Intergenic/Pseudo/Repeaed Region	-	Intergenic/Pseudo/Repeaed Region	-	Intergenic/Pseudo/Repeaed Region	-	Intergenic/Pseudo/Repeaed Region	4763752.0
1	1						77	3386688	77	100	73	IS30_IS30	3386688	3387908.0	NC_000913.3_art_ISs	3386587.0	3386687.0		3387909.0	3388009.0	NC_000913.3	3293791.0				3293992.0	IS only present in query Strain.	1. DLIS	Complete IS hit.	-	Intergenic/Pseudo/Repeaed Region	-	Intergenic/Pseudo/Repeaed Region	b3147	outer membrane lipoprotein - activator of MrcA activity	b3147	outer membrane lipoprotein - activator of MrcA activity	4763752.0
1	1						78	3441448	78	100	74	IS30_IS30	3441448	3442668.0	NC_000913.3_art_ISs	3441347.0	3441447.0		3442669.0	3442769.0	NC_000913.3	3347330.0				3347531.0	IS only present in query Strain.	1. DLIS	Complete IS hit.	-	Intergenic/Pseudo/Repeaed Region	-	Intergenic/Pseudo/Repeaed Region	b3205	RNase adaptor protein	b3205	RNase adaptor protein	4763752.0
1	1						79	3596382	79	100	75	IS30_IS30	3596382	3597602.0	NC_000913.3_art_ISs	3596281.0	3596381.0		3597603.0	3597703.0	NC_000913.3	3501043.0				3501244.0	IS only present in query Strain.	1. DLIS	Complete IS hit.	-	Intergenic/Pseudo/Repeaed Region	-	Intergenic/Pseudo/Repeaed Region	b3370	fructoselysine/psicoselysine transporter	b3370	fructoselysine/psicoselysine transporter	4763752.0
1	1						80	3615538	80	100	76	IS30_IS30	3615538	3616758.0	NC_000913.3_art_ISs	3615437.0	3615537.0		3616759.0	3616859.0	NC_000913.3	3518978.0				3519179.0	IS only present in query Strain.	1. DLIS	Complete IS hit.	b3390	shikimate kinase 1	-	Intergenic/Pseudo/Repeaed Region	b3390	shikimate kinase 1	-	Intergenic/Pseudo/Repeaed Region	4763752.0
1	1						81	3617769	81	100	77	IS30_IS30	3617769	3618989.0	NC_000913.3_art_ISs	3617668.0	3617768.0		3618990.0	3619090.0	NC_000913.3	3519988.0				3520189.0	IS only present in query Strain.	1. DLIS	Complete IS hit.	-	Intergenic/Pseudo/Repeaed Region	-	Intergenic/Pseudo/Repeaed Region	b3391	DNA utilization protein HofQ	b3391	DNA utilization protein HofQ	4763752.0
1	1						82	3654946	82	100	78	IS30_IS30	3654946	3656166.0	NC_000913.3_art_ISs	3654845.0	3654945.0		3656167.0	3656267.0	NC_000913.3	3555944.0				3556145.0	IS only present in query Strain.	1. DLIS	Complete IS hit.	-	Intergenic/Pseudo/Repeaed Region	-	Intergenic/Pseudo/Repeaed Region	b4475	RNA 3'-terminal phosphate cyclase	b4475	RNA 3'-terminal phosphate cyclase	4763752.0
1	1						83	3658126	83	100	79	IS30_IS30	3658126	3659346.0	NC_000913.3_art_ISs	3658025.0	3658125.0		3659347.0	3659447.0	NC_000913.3	3557903.0				3558104.0	IS only present in query Strain.	1. DLIS	Complete IS hit.	-	Intergenic/Pseudo/Repeaed Region	-	Intergenic/Pseudo/Repeaed Region	b3421	RNA-splicing ligase	-	Intergenic/Pseudo/Repeaed Region	4763752.0
1	1						84	3727323	84	100	80	IS30_IS30	3727323	3728543.0	NC_000913.3_art_ISs	3727222.0	3727322.0		3728544.0	3728644.0	NC_000913.3	3625879.0				3626080.0	IS only present in query Strain.	1. DLIS	Complete IS hit.	-	Intergenic/Pseudo/Repeaed Region	-	Intergenic/Pseudo/Repeaed Region	b3485	ABC transporter family protein YhhJ	b3485	ABC transporter family protein YhhJ	4763752.0
1	1						85	3766127	85	100	81	IS30_IS30	3766127	3767347.0	NC_000913.3_art_ISs	3766026.0	3766126.0		3767348.0	3767448.0	NC_000913.3	3663462.0				3663663.0	IS only present in query Strain.	1. DLIS	Complete IS hit.	b3514	multidrug efflux pump RND permease MdtF	-	Intergenic/Pseudo/Repeaed Region	b3514	multidrug efflux pump RND permease MdtF	-	Intergenic/Pseudo/Repeaed Region	4763752.0
1	1						86	3798695	86	100	82	IS30_IS30	3798695	3799915.0	NC_000913.3_art_ISs	3798594.0	3798694.0		3799916.0	3800016.0	NC_000913.3	3694809.0				3695010.0	IS only present in query Strain.	1. DLIS	Complete IS hit.	-	Intergenic/Pseudo/Repeaed Region	-	Intergenic/Pseudo/Repeaed Region	b3533	cellulose synthase catalytic subunit	b3533	cellulose synthase catalytic subunit	4763752.0
1	1						87	3900620	87	100	83	IS30_IS30	3900620	3901840.0	NC_000913.3_art_ISs	3900519.0	3900619.0		3901841.0	3901941.0	NC_000913.3	3795513.0				3795714.0	IS only present in query Strain.	1. DLIS	Complete IS hit.	-	Intergenic/Pseudo/Repeaed Region	-	Intergenic/Pseudo/Repeaed Region	b3620	ADP-heptose--LPS heptosyltransferase 2	b3620	ADP-heptose--LPS heptosyltransferase 2	4763752.0
1	1						88	4006509	88	100	84	IS30_IS30	4006509	4007729.0	NC_000913.3_art_ISs	4006408.0	4006508.0		4007730.0	4007830.0	NC_000913.3	3900181.0				3900382.0	IS only present in query Strain.	1. DLIS	Complete IS hit.	-	Intergenic/Pseudo/Repeaed Region	-	Intergenic/Pseudo/Repeaed Region	b3719	putative hydrolase YieL	b3719	putative hydrolase YieL	4763752.0
1	1						89	4013286	89	100	85	IS30_IS30	4013286	4014506.0	NC_000913.3_art_ISs	4013185.0	4013285.0		4014507.0	4014607.0	NC_000913.3	3905737.0				3905938.0	IS only present in query Strain.	1. DLIS	Complete IS hit.	-	Intergenic/Pseudo/Repeaed Region	-	Intergenic/Pseudo/Repeaed Region	b3723	transcriptional antiterminator BglG	b3723	transcriptional antiterminator BglG	4763752.0
1	1						90	4027534	90	100	86	IS30_IS30	4027534	4028754.0	NC_000913.3_art_ISs	4027433.0	4027533.0		4028755.0	4028855.0	NC_000913.3	3918764.0				3918965.0	IS only present in query Strain.	1. DLIS	Complete IS hit.	-	Intergenic/Pseudo/Repeaed Region	-	Intergenic/Pseudo/Repeaed Region	b3734	ATP synthase F1 complex subunit alpha	b3734	ATP synthase F1 complex subunit alpha	4763752.0
1	1						91	4248889	91	100	87	IS30_IS30	4248889	4250109.0	NC_000913.3_art_ISs	4248788.0	4248888.0		4250110.0	4250210.0	NC_000913.3	4138898.0				4139099.0	IS only present in query Strain.	1. DLIS	Complete IS hit.	-	Intergenic/Pseudo/Repeaed Region	b3946	fructose-6-phosphate aldolase 2	b3945	L-1;2-propanediol dehydrogenase/glycerol dehydrogenase	b3946	fructose-6-phosphate aldolase 2	4763752.0
1	1						92	4260696	92	100	88	IS30_IS30	4260696	4261916.0	NC_000913.3_art_ISs	4260595.0	4260695.0		4261917.0	4262017.0	NC_000913.3	4149484.0				4149685.0	IS only present in query Strain.	1. DLIS	Complete IS hit.	-	Intergenic/Pseudo/Repeaed Region	-	Intergenic/Pseudo/Repeaed Region	b3955	phosphoethanolamine transferase EptC	b3955	phosphoethanolamine transferase EptC	4763752.0
1	1						93	4264502	93	100	89	IS30_IS30	4264502	4265722.0	NC_000913.3_art_ISs	4264401.0	4264501.0		4265723.0	4265823.0	NC_000913.3	4152069.0				4152270.0	IS only present in query Strain.	1. DLIS	Complete IS hit.	-	Intergenic/Pseudo/Repeaed Region	-	Intergenic/Pseudo/Repeaed Region	b3956	phosphoenolpyruvate carboxylase	b3956	phosphoenolpyruvate carboxylase	4763752.0
1	1						94	4311821	94	100	90	IS30_IS30	4311821	4313041.0	NC_000913.3_art_ISs	4311720.0	4311820.0		4313042.0	4313142.0	NC_000913.3	4198167.0				4198368.0	IS only present in query Strain.	1. DLIS	Complete IS hit.	-	Intergenic/Pseudo/Repeaed Region	-	Intergenic/Pseudo/Repeaed Region	b3997	uroporphyrinogen decarboxylase	b3997	uroporphyrinogen decarboxylase	4763752.0
1	1						95	4389275	95	100	91	IS30_IS30	4389275	4390495.0	NC_000913.3_art_ISs	4389174.0	4389274.0		4390496.0	4390596.0	NC_000913.3	4274400.0				4274601.0	IS only present in query Strain.	1. DLIS	Complete IS hit.	-	Intergenic/Pseudo/Repeaed Region	-	Intergenic/Pseudo/Repeaed Region	b4059	ssDNA-binding protein	b4059	ssDNA-binding protein	4763752.0
1	1						96	4434397	96	100	92	IS30_IS30	4434397	4435617.0	NC_000913.3_art_ISs	4434296.0	4434396.0		4435618.0	4435718.0	NC_000913.3	4318301.0				4318502.0	IS only present in query Strain.	1. DLIS	Complete IS hit.	-	Intergenic/Pseudo/Repeaed Region	-	Intergenic/Pseudo/Repeaed Region	b4097	carbon-phosphorus lyase subunit PhnK	b4097	carbon-phosphorus lyase subunit PhnK	4763752.0
	1			1			97	4461112	97	100	105	IS30_IS30	4461112	4461482.0	NC_000913.3_art_ISs	4461011.0	4461111.0		4461483.0	4461583.0							IS only present in query Strain.	2. Verify manually, possible false positive caused by consecutive ISs.	Partial IS hit.	-	Intergenic/Pseudo/Repeaed Region	-	Intergenic/Pseudo/Repeaed Region	-	-	-	-	4763752.0
	1			1			98	4461481	98	100	106	IS30_IS30	4461481	4462701.0	NC_000913.3_art_ISs	4461380.0	4461480.0		4462702.0	4462802.0	NC_000913.3	271292.0				271493.0	IS only present in query Strain.	2. Verify manually, possible false positive caused by consecutive ISs.	Complete IS hit.	-	Intergenic/Pseudo/Repeaed Region	-	Intergenic/Pseudo/Repeaed Region	b0256	IS30 transposase	b0256	IS30 transposase	4763752.0
1	1						99	4509587	99	100	93	IS30_IS30	4509587	4510807.0	NC_000913.3_art_ISs	4509486.0	4509586.0		4510808.0	4510908.0	NC_000913.3	4389828.0				4390029.0	IS only present in query Strain.	1. DLIS	Complete IS hit.	-	Intergenic/Pseudo/Repeaed Region	-	Intergenic/Pseudo/Repeaed Region	b4160	phosphatidylserine decarboxylase proenzyme	b4160	phosphatidylserine decarboxylase proenzyme	4763752.0
1	1						100	4524761	100	100	94	IS30_IS30	4524761	4525981.0	NC_000913.3_art_ISs	4524660.0	4524760.0		4525982.0	4526082.0	NC_000913.3	4403781.0				4403982.0	IS only present in query Strain.	1. DLIS	Complete IS hit.	-	Intergenic/Pseudo/Repeaed Region	-	Intergenic/Pseudo/Repeaed Region	b4175	regulator of FtsH protease	b4175	regulator of FtsH protease	4763752.0
		1	1						101	100	5	MITEYpe1_IS630	190617	190731.0	NC_000913.3_art_ISs	196621.0	196721.0		196837.0	196937.0	NC_000913.3	190516.0	190616.0		190732.0	190832.0	IS only present in ref Strain.	1. DLIS	Partial IS hit.	b0169	30S ribosomal subunit protein S2	-	-	b0164	phosphodiesterase YaeI	b0164	phosphodiesterase YaeI	4641652.0
		1	1						102	100	6	MITEYpe1_IS630	196722	196836.0	NC_000913.3_art_ISs	196621.0	196721.0		196837.0	196937.0	NC_000913.3	190516.0	190616.0		190732.0	190832.0	IS only present in query Strain.	1. DLIS	Partial IS hit.	b0169	30S ribosomal subunit protein S2	-	Intergenic/Pseudo/Repeaed Region	b0169	30S ribosomal subunit protein S2	-	-	4763752.0
		1	1						103	100	38	MITEYpe1_IS630	1362516	1362632.0	NC_000913.3_art_ISs	1408813.0	1408913.0		1409030.0	1409131.0	NC_000913.3	1362415.0	1362515.0		1362633.0	1362733.0	IS only present in ref Strain.	1. DLIS	Partial IS hit.	b1299	DNA-binding transcriptional repressor PuuR	-	-	b1259	protein YciG	-	Intergenic/Pseudo/Repeaed Region	4641652.0
		1	1						104	100	39	MITEYpe1_IS630	1408914	1409030.0	NC_000913.3_art_ISs	1408813.0	1408913.0		1409031.0	1409131.0	NC_000913.3	1362415.0	1362515.0		1362632.0	1362733.0	IS only present in query Strain.	1. DLIS	Partial IS hit.	b1299	DNA-binding transcriptional repressor PuuR	-	Intergenic/Pseudo/Repeaed Region	b1299	DNA-binding transcriptional repressor PuuR	-	-	4763752.0
			1						105	100	96	IS30_IS30	249701	250822.0	NC_000913.3_art_ISs	249600.0	249700.0		250823.0	250923.0	NC_000913.3	1469294.0	1469396.0				IS only present in query Strain.	2. Verify manually, possible false positive caused by consecutive ISs.	Partial IS hit.	-	Intergenic/Pseudo/Repeaed Region	-	Intergenic/Pseudo/Repeaed Region	b4492	putative outer membrane protein; N-terminal fragment	-	-	4763752.0
			1						106	100	97	ISEc1_ISAs1	736682	737971.0	NC_000913.3_art_ISs	763443.0				763668.0	NC_000913.3	736581.0	736681.0		737972.0	738072.0	IS only present in ref Strain.	2. Verify manually, possible false positive caused by consecutive ISs.	Complete IS hit.	b4514	inactive transposase YbfQ	-	Intergenic/Pseudo/Repeaed Region	b0681	chitobiose outer membrane channel	b0684	flavodoxin 1	4641652.0
			1						107	100	98	ISEc1_ISAs1	763544	764833.0	NC_000913.3_art_ISs	763443.0	763543.0		764834.0	764934.0	NC_000913.3	736581.0				736806.0	IS only present in query Strain.	2. Verify manually, possible false positive caused by consecutive ISs.	Complete IS hit.	b4514	inactive transposase YbfQ	-	Intergenic/Pseudo/Repeaed Region	b4514	inactive transposase YbfQ	-	Intergenic/Pseudo/Repeaed Region	4763752.0
			1						108	100	103	IS30_IS30	2316971	2317566.0	NC_000913.3_art_ISs	2316870.0	2316970.0		2317567.0	2317667.0							IS only present in query Strain.	2. Verify manually, possible false positive caused by consecutive ISs.	Partial IS hit.	-	Intergenic/Pseudo/Repeaed Region	-	Intergenic/Pseudo/Repeaed Region	-	-	-	-	4763752.0
			1						109	100	104	IS30_IS30	2317567	2317964.0	NC_000913.3_art_ISs	2317466.0	2317566.0		2317965.0	2318065.0	NC_000913.3	271661.0	271762.0				IS only present in query Strain.	2. Verify manually, possible false positive caused by consecutive ISs.	Partial IS hit.	-	Intergenic/Pseudo/Repeaed Region	-	Intergenic/Pseudo/Repeaed Region	b0256	IS30 transposase	-	-	4763752.0
			1						110	100	107	IS30_IS30	4462702	4463553.0	NC_000913.3_art_ISs	4462601.0	4462701.0		4463554.0	4463654.0	NC_000913.3	1469295.0	1469396.0				IS only present in query Strain.	2. Verify manually, possible false positive caused by consecutive ISs.	Partial IS hit.	-	Intergenic/Pseudo/Repeaed Region	-	Intergenic/Pseudo/Repeaed Region	b4492	putative outer membrane protein; N-terminal fragment	-	-	4763752.0
			1						111	100	108	MITEEc1_IS630	1279354	1279475.0	NC_000913.3_art_ISs	1324430.0	1324530.0		1324653.0	1324753.0	NC_000913.3	1279253.0	1279353.0		1279476.0	1279576.0	IS only present in ref Strain.	3. Verify manually, Possible false positive produced by consecutive IS [2 RAFs found, only one with an IS].		b1223	nitrate:nitrite antiporter NarK	-	-	b1188	PF04293 family protein YcgB	b1188	PF04293 family protein YcgB	4641652.0
			1						112	100	109	MITEEc1_IS630	1324531	1324652.0	NC_000913.3_art_ISs	1324430.0	1324530.0		1324653.0	1324753.0	NC_000913.3	1279253.0	1279353.0		1279476.0	1279576.0	IS only present in query Strain.	3. Verify manually, Possible false positive produced by consecutive IS [2 RAFs found, only one with an IS].		b1223	nitrate:nitrite antiporter NarK	-	Intergenic/Pseudo/Repeaed Region	b1223	nitrate:nitrite antiporter NarK	-	-	4763752.0
			1						113	100	110	MITEEc1_IS630	1768776	1768897.0	NC_000913.3_art_ISs	1829725.0	1829825.0		1829945.0	1830048.0	NC_000913.3	1768675.0	1768775.0		1768898.0	1768998.0	IS only present in ref Strain.	3. Verify manually, Possible false positive produced by consecutive IS [2 RAFs found, only one with an IS].		b1687	putative FAD-linked oxidoreductase	-	-	-	Intergenic/Pseudo/Repeaed Region	b1630	SoxR [2Fe-2S] reducing system protein RsxD	4641652.0
			1						114	100	111	MITEEc1_IS630	1829826	1829947.0	NC_000913.3_art_ISs	1829725.0	1829825.0		1829948.0	1830048.0	NC_000913.3	1768675.0	1768775.0		1768895.0	1768998.0	IS only present in query Strain.	3. Verify manually, Possible false positive produced by consecutive IS [2 RAFs found, only one with an IS].		b1687	putative FAD-linked oxidoreductase	-	Intergenic/Pseudo/Repeaed Region	b1687	putative FAD-linked oxidoreductase	-	-	4763752.0
			1						115	100	113	ISEc52_IS3_IS3	271762	272190.0	NC_000913.3_art_ISs	1317993.0	1318097.0				NC_000913.3	271661.0	271761.0		272191.0	272291.0	IS only present in ref Strain.	5. Discarded for analysis. There were multiple blastn hits, and left and right pairs could not be determined.	Partial IS hit.	-	Intergenic/Pseudo/Repeaed Region	-	-	b0243	glutamate-5-semialdehyde dehydrogenase	b0243	glutamate-5-semialdehyde dehydrogenase	4641652.0
			1						116	100	114	IS2_IS2_IS3	399833	400905.0	NC_000913.3_art_ISs	399732.0	399832.0		400906.0	401006.0	NC_000913.3	1469289.0	1469396.0				IS only present in query Strain.	5. Discarded for analysis. There were multiple blastn hits, and left and right pairs could not be determined.	Partial IS hit.	-	Intergenic/Pseudo/Repeaed Region	-	Intergenic/Pseudo/Repeaed Region	b4492	putative outer membrane protein; N-terminal fragment	-	-	4763752.0
91	99	4	16	9	1	*			117	100
1	1						1	446	118	200	0	IS30_IS30	446	1666.0	NC_000913.3_art_ISs	245.0	445.0		1667.0	1867.0	NC_000913.3	245.0				646.0	IS only present in query Strain.	1. DLIS	Complete IS hit.	b0001	thr operon leader peptide	-	Intergenic/Pseudo/Repeaed Region	b0001	thr operon leader peptide	b0002	fused aspartate kinase/homoserine dehydrogenase 1	4763752.0
1	1						2	3160	119	200	1	IS30_IS30	3160	4380.0	NC_000913.3_art_ISs	2959.0	3159.0		4381.0	4581.0	NC_000913.3	1738.0				2139.0	IS only present in query Strain.	1. DLIS	Complete IS hit.	-	Intergenic/Pseudo/Repeaed Region	-	Intergenic/Pseudo/Repeaed Region	b0002	fused aspartate kinase/homoserine dehydrogenase 1	b0002	fused aspartate kinase/homoserine dehydrogenase 1	4763752.0
1	1						3	123711	120	200	2	IS30_IS30	123711	124931.0	NC_000913.3_art_ISs	123510.0	123710.0		124932.0	125132.0	NC_000913.3	121068.0				121469.0	IS only present in query Strain.	1. DLIS	Complete IS hit.	-	Intergenic/Pseudo/Repeaed Region	-	Intergenic/Pseudo/Repeaed Region	b0112	aromatic amino acid:H(+) symporter AroP	b0112	aromatic amino acid:H(+) symporter AroP	4763752.0
1	1						4	142989	121	200	3	IS30_IS30	142989	144209.0	NC_000913.3_art_ISs	142788.0	142988.0		144210.0	144410.0	NC_000913.3	139125.0				139526.0	IS only present in query Strain.	1. DLIS	Complete IS hit.	-	Intergenic/Pseudo/Repeaed Region	-	Intergenic/Pseudo/Repeaed Region	b0124	quinoprotein glucose dehydrogenase	b0124	quinoprotein glucose dehydrogenase	4763752.0
1	1						5	163498	122	200	4	IS30_IS30	163498	164718.0	NC_000913.3_art_ISs	163297.0	163497.0		164719.0	164919.0	NC_000913.3	158413.0				158814.0	IS only present in query Strain.	1. DLIS	Complete IS hit.	-	Intergenic/Pseudo/Repeaed Region	-	Intergenic/Pseudo/Repeaed Region	b0143	poly(A) polymerase I	b0143	poly(A) polymerase I	4763752.0
1	1						6	240046	123	200	5	IS30_IS30	240046	241266.0	NC_000913.3_art_ISs	239845.0	240045.0		241267.0	241467.0	NC_000913.3	233740.0				234141.0	IS only present in query Strain.	1. DLIS	Complete IS hit.	-	Intergenic/Pseudo/Repeaed Region	b0212	hydroxyacylglutathione hydrolase GloB	b0211	membrane-bound lytic murein transglycosylase D	b0212	hydroxyacylglutathione hydrolase GloB	4763752.0
				1	1		7	248381	124	200
	1			1			8	248480	125	200	91	IS30_IS30	248480	249700.0	NC_000913.3_art_ISs	248279.0	248479.0		249701.0	249901.0							IS only present in query Strain.	2. Verify manually, possible false positive caused by consecutive ISs.		-	Intergenic/Pseudo/Repeaed Region	-	Intergenic/Pseudo/Repeaed Region	-	-	-	-	4763752.0
1	1						9	310515	126	200	6	IS30_IS30	310515	311735.0	NC_000913.3_art_ISs	310314.0	310514.0		311736.0	311936.0	NC_000913.3	300546.0				300947.0	IS only present in query Strain.	1. DLIS	Complete IS hit.	-	Intergenic/Pseudo/Repeaed Region	b0285	aldehyde dehydrogenase; FAD-binding subunit	b0284	aldehyde dehydrogenase: molybdenum cofactor-binding subunit	b0285	aldehyde dehydrogenase; FAD-binding subunit	4763752.0
1	1						10	315801	127	200	7	IS30_IS30	315801	317021.0	NC_000913.3_art_ISs	315600.0	315800.0		317022.0	317222.0	NC_000913.3	304611.0				305012.0	IS only present in query Strain.	1. DLIS	Complete IS hit.	-	Intergenic/Pseudo/Repeaed Region	-	Intergenic/Pseudo/Repeaed Region	b0289	putative fimbrial chaperone EcpE	b0289	putative fimbrial chaperone EcpE	4763752.0
1	1						11	333734	128	200	8	IS30_IS30	333734	334954.0	NC_000913.3_art_ISs	333533.0	333733.0		334955.0	335155.0	NC_000913.3	321323.0				321724.0	IS only present in query Strain.	1. DLIS	Complete IS hit.	-	Intergenic/Pseudo/Repeaed Region	b0306	putative lactate utilization oxidoreductase YkgE	-	Intergenic/Pseudo/Repeaed Region	b0306	putative lactate utilization oxidoreductase YkgE	4763752.0
1	1						12	356194	129	200	9	IS30_IS30	356194	357414.0	NC_000913.3_art_ISs	355993.0	356193.0		357415.0	357615.0	NC_000913.3	342562.0				342963.0	IS only present in query Strain.	1. DLIS	Complete IS hit.	-	Intergenic/Pseudo/Repeaed Region	b0325	aldehyde reductase; NADPH-dependent	-	Intergenic/Pseudo/Repeaed Region	b0325	aldehyde reductase; NADPH-dependent	4763752.0
1	1						13	361260	130	200	10	IS30_IS30	361260	362480.0	NC_000913.3_art_ISs	361059.0	361259.0		362481.0	362681.0	NC_000913.3	346407.0				346808.0	IS only present in query Strain.	1. DLIS	Complete IS hit.	-	Intergenic/Pseudo/Repeaed Region	-	Intergenic/Pseudo/Repeaed Region	-	Intergenic/Pseudo/Repeaed Region	-	Intergenic/Pseudo/Repeaed Region	4763752.0
1	1						14	395877	131	200	11	IS30_IS30	395877	397097.0	NC_000913.3_art_ISs	395676.0	395876.0		397098.0	397298.0	NC_000913.3	379803.0				380204.0	IS only present in query Strain.	1. DLIS	Complete IS hit.	b0357	DNA-binding transcriptional repressor FrmR	b0358	outer membrane protein YaiO	b0357	DNA-binding transcriptional repressor FrmR	b0358	outer membrane protein YaiO	4763752.0
1	1						15	398612	132	200	12	IS30_IS30	398612	399832.0	NC_000913.3_art_ISs	398411.0	398611.0		399833.0	400033.0	NC_000913.3	381317.0				381718.0	IS only present in query Strain.	1. DLIS	Complete IS hit.	-	Intergenic/Pseudo/Repeaed Region	b0361	IS2 element protein	-	Intergenic/Pseudo/Repeaed Region	b0361	IS2 element protein	4763752.0
1	1						16	458588	133	200	13	IS30_IS30	458588	459808.0	NC_000913.3_art_ISs	458387.0	458587.0		459809.0	460009.0	NC_000913.3	440072.0				440473.0	IS only present in query Strain.	1. DLIS	Complete IS hit.	b0420	1-deoxy-D-xylulose-5-phosphate synthase	-	Intergenic/Pseudo/Repeaed Region	b0420	1-deoxy-D-xylulose-5-phosphate synthase	b0421	geranyl diphosphate/farnesyl diphosphate synthase	4763752.0
1	1						17	515332	134	200	14	IS30_IS30	515332	516552.0	NC_000913.3_art_ISs	515131.0	515331.0		516553.0	516753.0	NC_000913.3	495595.0				495996.0	IS only present in query Strain.	1. DLIS	Complete IS hit.	-	Intergenic/Pseudo/Repeaed Region	-	Intergenic/Pseudo/Repeaed Region	b0473	chaperone protein HtpG	b0473	chaperone protein HtpG	4763752.0
1	1						18	518331	135	200	15	IS30_IS30	518331	519551.0	NC_000913.3_art_ISs	518130.0	518330.0		519552.0	519752.0	NC_000913.3	497373.0				497774.0	IS only present in query Strain.	1. DLIS	Complete IS hit.	-	Intergenic/Pseudo/Repeaed Region	-	Intergenic/Pseudo/Repeaed Region	b0474	adenylate kinase	b0474	adenylate kinase	4763752.0
1	1						19	564278	136	200	16	IS30_IS30	564278	565498.0	NC_000913.3_art_ISs	564077.0	564277.0		565499.0	565699.0	NC_000913.3	542099.0				542500.0	IS only present in query Strain.	1. DLIS	Complete IS hit.	-	Intergenic/Pseudo/Repeaed Region	-	Intergenic/Pseudo/Repeaed Region	b0514	glycerate 2-kinase 2	b0514	glycerate 2-kinase 2	4763752.0
1	1						20	638410	137	200	17	IS30_IS30	638410	639630.0	NC_000913.3_art_ISs	638209.0	638409.0		639631.0	639831.0	NC_000913.3	615010.0				615411.0	IS only present in query Strain.	1. DLIS	Complete IS hit.	-	Intergenic/Pseudo/Repeaed Region	-	Intergenic/Pseudo/Repeaed Region	b0586	apo-serine activating enzyme	b0586	apo-serine activating enzyme	4763752.0
1	1						21	643571	138	200	18	IS30_IS30	643571	644791.0	NC_000913.3_art_ISs	643370.0	643570.0		644792.0	644992.0	NC_000913.3	618950.0				619351.0	IS only present in query Strain.	1. DLIS	Complete IS hit.	-	Intergenic/Pseudo/Repeaed Region	-	Intergenic/Pseudo/Repeaed Region	b0587	polysaccharide co-polymerase family protein FepE	b0587	polysaccharide co-polymerase family protein FepE	4763752.0
1	1						22	709250	139	200	19	IS30_IS30	709250	710470.0	NC_000913.3_art_ISs	709049.0	709249.0		710471.0	710671.0	NC_000913.3	683408.0				683809.0	IS only present in query Strain.	1. DLIS	Complete IS hit.	-	Intergenic/Pseudo/Repeaed Region	-	Intergenic/Pseudo/Repeaed Region	-	Intergenic/Pseudo/Repeaed Region	b0651	pyrimidine-specific ribonucleoside hydrolase RihA	4763752.0
1	1						23	780879	140	200	20	IS30_IS30	780879	782099.0	NC_000913.3_art_ISs	780678.0	780878.0		782100.0	782300.0	NC_000913.3	753816.0				754217.0	IS only present in query Strain.	1. DLIS	Complete IS hit.	-	Intergenic/Pseudo/Repeaed Region	-	Intergenic/Pseudo/Repeaed Region	b0720	citrate synthase	b0720	citrate synthase	4763752.0
1	1						24	794533	141	200	21	IS30_IS30	794533	795753.0	NC_000913.3_art_ISs	794332.0	794532.0		795754.0	795954.0	NC_000913.3	766249.0				766650.0	IS only present in query Strain.	1. DLIS	Complete IS hit.	-	Intergenic/Pseudo/Repeaed Region	-	Intergenic/Pseudo/Repeaed Region	b0731	2-O-alpha-mannosyl-D-glycerate specific PTS enzyme II	b0731	2-O-alpha-mannosyl-D-glycerate specific PTS enzyme II	4763752.0
1	1						25	818746	142	200	22	IS30_IS30	818746	819966.0	NC_000913.3_art_ISs	818545.0	818745.0		819967.0	820167.0	NC_000913.3	789241.0				789642.0	IS only present in query Strain.	1. DLIS	Complete IS hit.	-	Intergenic/Pseudo/Repeaed Region	-	Intergenic/Pseudo/Repeaed Region	b0757	galactokinase	b0757	galactokinase	4763752.0
1	1						26	827842	143	200	23	IS30_IS30	827842	829062.0	NC_000913.3_art_ISs	827641.0	827841.0		829063.0	829263.0	NC_000913.3	797116.0				797517.0	IS only present in query Strain.	1. DLIS	Complete IS hit.	-	Intergenic/Pseudo/Repeaed Region	-	Intergenic/Pseudo/Repeaed Region	b0765	molybdate ABC transporter ATP binding subunit	b0765	molybdate ABC transporter ATP binding subunit	4763752.0
1	1						27	840349	144	200	24	IS30_IS30	840349	841569.0	NC_000913.3_art_ISs	840148.0	840348.0		841570.0	841770.0	NC_000913.3	808402.0				808803.0	IS only present in query Strain.	1. DLIS	Complete IS hit.	-	Intergenic/Pseudo/Repeaed Region	-	Intergenic/Pseudo/Repeaed Region	b0774	adenosylmethionine-8-amino-7-oxononanoate aminotransferase	b0774	adenosylmethionine-8-amino-7-oxononanoate aminotransferase	4763752.0
1	1						28	866245	145	200	25	IS30_IS30	866245	867465.0	NC_000913.3_art_ISs	866044.0	866244.0		867466.0	867666.0	NC_000913.3	833077.0				833478.0	IS only present in query Strain.	1. DLIS	Complete IS hit.	-	Intergenic/Pseudo/Repeaed Region	-	Intergenic/Pseudo/Repeaed Region	b0799	ATP-dependent DNA helicase DinG	b0799	ATP-dependent DNA helicase DinG	4763752.0
1	1						29	885800	146	200	26	IS30_IS30	885800	887020.0	NC_000913.3_art_ISs	885599.0	885799.0		887021.0	887221.0	NC_000913.3	851411.0				851812.0	IS only present in query Strain.	1. DLIS	Complete IS hit.	-	Intergenic/Pseudo/Repeaed Region	-	Intergenic/Pseudo/Repeaed Region	b0815	phosphoethanolamine transferase	b0815	phosphoethanolamine transferase	4763752.0
1	1						30	1054897	147	200	27	IS30_IS30	1054897	1056117.0	NC_000913.3_art_ISs	1054696.0	1054896.0		1056118.0	1056318.0	NC_000913.3	1019287.0				1019688.0	IS only present in query Strain.	1. DLIS	Complete IS hit.	-	Intergenic/Pseudo/Repeaed Region	-	Intergenic/Pseudo/Repeaed Region	b0957	outer membrane porin A	b0957	outer membrane porin A	4763752.0
1	1						31	1102873	148	200	28	IS30_IS30	1102873	1104093.0	NC_000913.3_art_ISs	1102672.0	1102872.0		1104094.0	1104294.0	NC_000913.3	1066042.0				1066443.0	IS only present in query Strain.	1. DLIS	Complete IS hit.	-	Intergenic/Pseudo/Repeaed Region	-	Intergenic/Pseudo/Repeaed Region	b1002	glucose-1-phosphatase	b1002	glucose-1-phosphatase	4763752.0
1	1						32	1118119	149	200	29	IS30_IS30	1118119	1119339.0	NC_000913.3_art_ISs	1117918.0	1118118.0		1119340.0	1119540.0	NC_000913.3	1080067.0				1080468.0	IS only present in query Strain.	1. DLIS	Complete IS hit.	-	Intergenic/Pseudo/Repeaed Region	-	Intergenic/Pseudo/Repeaed Region	b1015	proline:Na(+) symporter	b1015	proline:Na(+) symporter	4763752.0
1	1						33	1150109	150	200	30	IS30_IS30	1150109	1151329.0	NC_000913.3_art_ISs	1149908.0	1150108.0		1151330.0	1151530.0	NC_000913.3	1110836.0				1111237.0	IS only present in query Strain.	1. DLIS	Complete IS hit.	b1048	osmoregulated periplasmic glucans (OPGs) biosynthesis protein G	-	Intergenic/Pseudo/Repeaed Region	b1048	osmoregulated periplasmic glucans (OPGs) biosynthesis protein G	b1049	osmoregulated periplasmic glucans (OPGs) biosynthesis protein H	4763752.0
1	1						34	1165669	151	200	31	IS30_IS30	1165669	1166889.0	NC_000913.3_art_ISs	1165468.0	1165668.0		1166890.0	1167090.0	NC_000913.3	1125175.0				1125576.0	IS only present in query Strain.	1. DLIS	Complete IS hit.	b1065	multidrug efflux pump MdtH	b1066	ribosomal-protein-S5-alanine N-acetyltransferase	b1065	multidrug efflux pump MdtH	b1066	ribosomal-protein-S5-alanine N-acetyltransferase	4763752.0
1	1						35	1252656	152	200	32	IS30_IS30	1252656	1253876.0	NC_000913.3_art_ISs	1252455.0	1252655.0		1253877.0	1254077.0	NC_000913.3	1210941.0				1211342.0	IS only present in query Strain.	1. DLIS	Complete IS hit.	-	Intergenic/Pseudo/Repeaed Region	-	Intergenic/Pseudo/Repeaed Region	b1159	e14 prophage; 5-methylcytosine-specific restriction enzyme McrA	-	Intergenic/Pseudo/Repeaed Region	4763752.0
1	1						36	1314729	153	200	33	IS30_IS30	1314729	1315949.0	NC_000913.3_art_ISs	1314528.0	1314728.0		1315950.0	1316150.0	NC_000913.3	1271793.0				1272194.0	IS only present in query Strain.	1. DLIS	Complete IS hit.	b1216	Na(+)/K(+):H(+) antiporter ChaA	b1217	putative cation transport regulator ChaB	b1216	Na(+)/K(+):H(+) antiporter ChaA	b1217	putative cation transport regulator ChaB	4763752.0
1	1						37	1316873	154	200	34	IS30_IS30	1316873	1318093.0	NC_000913.3_art_ISs	1316672.0	1316872.0		1318094.0	1318294.0	NC_000913.3	1272716.0				1273117.0	IS only present in query Strain.	1. DLIS	Complete IS hit.	-	Intergenic/Pseudo/Repeaed Region	-	Intergenic/Pseudo/Repeaed Region	b1218	glutathione-specific gamma-glutamylcyclotransferase	b1218	glutathione-specific gamma-glutamylcyclotransferase	4763752.0
1	1						38	1332696	155	200	35	IS30_IS30	1332696	1333916.0	NC_000913.3_art_ISs	1332495.0	1332695.0		1333917.0	1334117.0	NC_000913.3	1287318.0				1287719.0	IS only present in query Strain.	1. DLIS	Complete IS hit.	-	Intergenic/Pseudo/Repeaed Region	-	Intergenic/Pseudo/Repeaed Region	-	Intergenic/Pseudo/Repeaed Region	-	Intergenic/Pseudo/Repeaed Region	4763752.0
1	1						39	1477755	156	200	36	IS30_IS30	1477755	1478975.0	NC_000913.3_art_ISs	1477554.0	1477754.0		1478976.0	1479176.0	NC_000913.3	1431156.0				1431557.0	IS only present in query Strain.	1. DLIS	Complete IS hit.	-	Intergenic/Pseudo/Repeaed Region	-	Intergenic/Pseudo/Repeaed Region	b1372	Rac prophage; putative membrane protein	b1372	Rac prophage; putative membrane protein	4763752.0
1	1						40	1530090	157	200	37	IS30_IS30	1530090	1531310.0	NC_000913.3_art_ISs	1529889.0	1530089.0		1531311.0	1531511.0	NC_000913.3	1482270.0				1482671.0	IS only present in query Strain.	1. DLIS	Complete IS hit.	-	Intergenic/Pseudo/Repeaed Region	-	Intergenic/Pseudo/Repeaed Region	b1412	FMN dependent NADH:quinone oxidoreductase	b1412	FMN dependent NADH:quinone oxidoreductase	4763752.0
1	1						41	1599338	158	200	38	IS30_IS30	1599338	1600558.0	NC_000913.3_art_ISs	1599137.0	1599337.0		1600559.0	1600759.0	NC_000913.3	1550297.0				1550698.0	IS only present in query Strain.	1. DLIS	Complete IS hit.	b1474	formate dehydrogenase N subunit alpha	-	Intergenic/Pseudo/Repeaed Region	b1474	formate dehydrogenase N subunit alpha	b1475	formate dehydrogenase N subunit beta	4763752.0
1	1						42	1601001	159	200	39	IS30_IS30	1601001	1602221.0	NC_000913.3_art_ISs	1600800.0	1601000.0		1602222.0	1602422.0	NC_000913.3	1550739.0				1551140.0	IS only present in query Strain.	1. DLIS	Complete IS hit.	-	Intergenic/Pseudo/Repeaed Region	-	Intergenic/Pseudo/Repeaed Region	b1475	formate dehydrogenase N subunit beta	b1475	formate dehydrogenase N subunit beta	4763752.0
1	1						43	1614176	160	200	40	IS30_IS30	1614176	1615396.0	NC_000913.3_art_ISs	1613975.0	1614175.0		1615397.0	1615597.0	NC_000913.3	1562693.0				1563094.0	IS only present in query Strain.	1. DLIS	Complete IS hit.	-	Intergenic/Pseudo/Repeaed Region	-	Intergenic/Pseudo/Repeaed Region	b1488	D-alanyl-D-alanine dipeptidase	-	Intergenic/Pseudo/Repeaed Region	4763752.0
1	1						44	1700984	161	200	41	IS30_IS30	1700984	1702204.0	NC_000913.3_art_ISs	1700783.0	1700983.0		1702205.0	1702405.0	NC_000913.3	1648280.0				1648681.0	IS only present in query Strain.	1. DLIS	Complete IS hit.	b1570	DNA-binding transcriptional dual regulator DicA	b1572	Qin prophage; uncharacterized protein YdfB	b1570	DNA-binding transcriptional dual regulator DicA	b1572	Qin prophage; uncharacterized protein YdfB	4763752.0
1	1						45	1724977	162	200	42	IS30_IS30	1724977	1726197.0	NC_000913.3_art_ISs	1724776.0	1724976.0		1726198.0	1726398.0	NC_000913.3	1671052.0				1671453.0	IS only present in query Strain.	1. DLIS	Complete IS hit.	-	Intergenic/Pseudo/Repeaed Region	b1597	acid shock protein	-	Intergenic/Pseudo/Repeaed Region	b1597	acid shock protein	4763752.0
1	1						46	1739082	163	200	43	IS30_IS30	1739082	1740302.0	NC_000913.3_art_ISs	1738881.0	1739081.0		1740303.0	1740503.0	NC_000913.3	1683936.0				1684337.0	IS only present in query Strain.	1. DLIS	Complete IS hit.	-	Intergenic/Pseudo/Repeaed Region	b1610	DNA replication terminus site-binding protein	b1609	sensory histidine kinase RstB	b1610	DNA replication terminus site-binding protein	4763752.0
1	1						47	1744580	164	200	44	IS30_IS30	1744580	1745800.0	NC_000913.3_art_ISs	1744379.0	1744579.0		1745801.0	1746001.0	NC_000913.3	1688213.0				1688614.0	IS only present in query Strain.	1. DLIS	Complete IS hit.	b1612	fumarase A	b1613	mannose-6-phosphate isomerase	b1612	fumarase A	b1613	mannose-6-phosphate isomerase	4763752.0
1	1						48	1763370	165	200	45	IS30_IS30	1763370	1764590.0	NC_000913.3_art_ISs	1763169.0	1763369.0		1764591.0	1764791.0	NC_000913.3	1705782.0				1706183.0	IS only present in query Strain.	1. DLIS	Complete IS hit.	-	Intergenic/Pseudo/Repeaed Region	-	Intergenic/Pseudo/Repeaed Region	b1627	SoxR [2Fe-2S] reducing system protein RsxA	b1627	SoxR [2Fe-2S] reducing system protein RsxA	4763752.0
1	1						49	1767126	166	200	46	IS30_IS30	1767126	1768346.0	NC_000913.3_art_ISs	1766925.0	1767125.0		1768347.0	1768547.0	NC_000913.3	1708317.0				1708718.0	IS only present in query Strain.	1. DLIS	Complete IS hit.	-	Intergenic/Pseudo/Repeaed Region	-	Intergenic/Pseudo/Repeaed Region	b1629	SoxR [2Fe-2S] reducing system protein RsxC	b1629	SoxR [2Fe-2S] reducing system protein RsxC	4763752.0
1	1						50	1803050	167	200	47	IS30_IS30	1803050	1804270.0	NC_000913.3_art_ISs	1802849.0	1803049.0		1804271.0	1804471.0	NC_000913.3	1743020.0				1743421.0	IS only present in query Strain.	1. DLIS	Complete IS hit.	-	Intergenic/Pseudo/Repeaed Region	-	Intergenic/Pseudo/Repeaed Region	b1662	riboflavin synthase	-	Intergenic/Pseudo/Repeaed Region	4763752.0
	1			1			51	1869279	168	200	95	IS30_IS30	1869279	1870499.0	NC_000913.3_art_ISs	1869078.0	1869278.0		1870500.0	1870700.0	NC_000913.3	1470336.0	1470522.0				IS only present in query Strain.	2. Verify manually, possible false positive caused by consecutive ISs.		-	Intergenic/Pseudo/Repeaed Region	-	Intergenic/Pseudo/Repeaed Region	b4492	putative outer membrane protein; N-terminal fragment	-	-	4763752.0
	1			1			52	1870520	169	200	96	IS30_IS30	1870520	1871740.0	NC_000913.3_art_ISs	1870319.0	1870519.0		1871741.0	1871941.0	NC_000913.3	1470336.0	1470521.0				IS only present in query Strain.	2. Verify manually, possible false positive caused by consecutive ISs.		-	Intergenic/Pseudo/Repeaed Region	-	Intergenic/Pseudo/Repeaed Region	b4492	putative outer membrane protein; N-terminal fragment	-	-	4763752.0
1	1						53	1904586	170	200	48	IS30_IS30	1904586	1905806.0	NC_000913.3_art_ISs	1904385.0	1904585.0		1905807.0	1906007.0	NC_000913.3	1840893.0				1841294.0	IS only present in query Strain.	1. DLIS	Complete IS hit.	-	Intergenic/Pseudo/Repeaed Region	-	Intergenic/Pseudo/Repeaed Region	b1758	putative phosphatidyl transferase; inner membrane protein	b1758	putative phosphatidyl transferase; inner membrane protein	4763752.0
1	1						54	1932848	171	200	49	IS30_IS30	1932848	1934068.0	NC_000913.3_art_ISs	1932647.0	1932847.0		1934069.0	1934269.0	NC_000913.3	1867934.0				1868335.0	IS only present in query Strain.	1. DLIS	Complete IS hit.	-	Intergenic/Pseudo/Repeaed Region	-	Intergenic/Pseudo/Repeaed Region	b1783	protein kinase YeaG	b1783	protein kinase YeaG	4763752.0
1	1						55	1937860	172	200	50	IS30_IS30	1937860	1939080.0	NC_000913.3_art_ISs	1937659.0	1937859.0		1939081.0	1939281.0	NC_000913.3	1871725.0				1872126.0	IS only present in query Strain.	1. DLIS	Complete IS hit.	b1785	putative c-di-GMP binding protein CdgI	b1786	putative diguanylate cyclase DgcJ	b1785	putative c-di-GMP binding protein CdgI	b1786	putative diguanylate cyclase DgcJ	4763752.0
1	1						56	2146825	173	200	51	IS30_IS30	2146825	2148045.0	NC_000913.3_art_ISs	2146624.0	2146824.0		2148046.0	2148246.0	NC_000913.3	2079469.0				2079870.0	IS only present in query Strain.	1. DLIS	Complete IS hit.	-	Intergenic/Pseudo/Repeaed Region	-	Intergenic/Pseudo/Repeaed Region	-	Intergenic/Pseudo/Repeaed Region	b2008	putative transporter YeeA	4763752.0
1	1						57	2291220	174	200	52	IS30_IS30	2291220	2292440.0	NC_000913.3_art_ISs	2291019.0	2291219.0		2292441.0	2292641.0	NC_000913.3	2222643.0				2223044.0	IS only present in query Strain.	1. DLIS	Complete IS hit.	-	Intergenic/Pseudo/Repeaed Region	-	Intergenic/Pseudo/Repeaed Region	b2133	D-lactate dehydrogenase	b2133	D-lactate dehydrogenase	4763752.0
1	1						58	2302324	175	200	53	IS30_IS30	2302324	2303544.0	NC_000913.3_art_ISs	2302123.0	2302323.0		2303545.0	2303745.0	NC_000913.3	2232526.0				2232927.0	IS only present in query Strain.	1. DLIS	Complete IS hit.	-	Intergenic/Pseudo/Repeaed Region	b2144	DUF218 domain-containing protein SanA	b2143	cytidine/deoxycytidine deaminase	b2144	DUF218 domain-containing protein SanA	4763752.0
1	1						59	2305151	176	200	54	IS30_IS30	2305151	2306371.0	NC_000913.3_art_ISs	2304950.0	2305150.0		2306372.0	2306572.0	NC_000913.3	2234132.0				2234533.0	IS only present in query Strain.	1. DLIS	Complete IS hit.	-	Intergenic/Pseudo/Repeaed Region	-	Intergenic/Pseudo/Repeaed Region	b2146	NAD-dependent dihydropyrimidine dehydrogenase subunit PreT	b2146	NAD-dependent dihydropyrimidine dehydrogenase subunit PreT	4763752.0
	1			1			60	2314302	177	200	97	IS30_IS30	2314302	2315125.0	NC_000913.3_art_ISs	2314101.0	2314301.0		2315126.0	2315326.0							IS only present in query Strain.	2. Verify manually, possible false positive caused by consecutive ISs.	Partial IS hit.	-	Intergenic/Pseudo/Repeaed Region	-	Intergenic/Pseudo/Repeaed Region	-	-	-	-	4763752.0
	1			1			61	2315125	178	200	98	IS30_IS30	2315125	2315756.0	NC_000913.3_art_ISs	2314924.0	2315124.0		2315757.0	2315957.0	NC_000913.3	4507458.0	4507659.0		4508081.0	4508282.0	IS only present in query Strain.	2. Verify manually, possible false positive caused by consecutive ISs.	Partial IS hit.	-	Intergenic/Pseudo/Repeaed Region	-	Intergenic/Pseudo/Repeaed Region	b4284	KpLE2 phage-like element; IS30 transposase	-	-	4763752.0
	1			1			62	2315757	179	200	99	IS30_IS30	2315757	2316977.0	NC_000913.3_art_ISs	2315556.0	2315756.0		2316978.0	2317178.0	NC_000913.3	270972.0				271373.0	IS only present in query Strain.	2. Verify manually, possible false positive caused by consecutive ISs.	Complete IS hit.	-	Intergenic/Pseudo/Repeaed Region	-	Intergenic/Pseudo/Repeaed Region	b0256	IS30 transposase	b0256	IS30 transposase	4763752.0
1	1						63	2331004	180	200	55	IS30_IS30	2331004	2332224.0	NC_000913.3_art_ISs	2330803.0	2331003.0		2332225.0	2332425.0	NC_000913.3	2255101.0				2255502.0	IS only present in query Strain.	1. DLIS	Complete IS hit.	b2162	pyrimidine-specific ribonucleoside hydrolase RihB	b2163	putative DNA-binding transcriptional regulator YeiL	b2162	pyrimidine-specific ribonucleoside hydrolase RihB	b2163	putative DNA-binding transcriptional regulator YeiL	4763752.0
1	1						64	2338335	181	200	56	IS30_IS30	2338335	2339555.0	NC_000913.3_art_ISs	2338134.0	2338334.0		2339556.0	2339756.0	NC_000913.3	2261211.0				2261612.0	IS only present in query Strain.	1. DLIS	Complete IS hit.	b2167	fructose-specific PTS multiphosphoryl transfer protein FruA	b2168	1-phosphofructokinase	b2167	fructose-specific PTS multiphosphoryl transfer protein FruA	b2168	1-phosphofructokinase	4763752.0
1	1						65	2415048	182	200	57	IS30_IS30	2415048	2416268.0	NC_000913.3_art_ISs	2414847.0	2415047.0		2416269.0	2416469.0	NC_000913.3	2336703.0				2337104.0	IS only present in query Strain.	1. DLIS	Complete IS hit.	-	Intergenic/Pseudo/Repeaed Region	-	Intergenic/Pseudo/Repeaed Region	-	Intergenic/Pseudo/Repeaed Region	b2231	DNA gyrase subunit A	4763752.0
1	1						66	2462961	183	200	58	IS30_IS30	2462961	2464181.0	NC_000913.3_art_ISs	2462760.0	2462960.0		2464182.0	2464382.0	NC_000913.3	2383395.0				2383796.0	IS only present in query Strain.	1. DLIS	Complete IS hit.	-	Intergenic/Pseudo/Repeaed Region	-	Intergenic/Pseudo/Repeaed Region	b2269	protease ElaD	b2269	protease ElaD	4763752.0
1	1						67	2528130	184	200	59	IS30_IS30	2528130	2529350.0	NC_000913.3_art_ISs	2527929.0	2528129.0		2529351.0	2529551.0	NC_000913.3	2447343.0				2447744.0	IS only present in query Strain.	1. DLIS	Complete IS hit.	b2329	chorismate synthase	-	Intergenic/Pseudo/Repeaed Region	b2329	chorismate synthase	b2330	50S ribosomal subunit protein L3 N(5)-glutamine methyltransferase	4763752.0
1	1						68	2951446	185	200	60	IS30_IS30	2951446	2952666.0	NC_000913.3_art_ISs	2951245.0	2951445.0		2952667.0	2952867.0	NC_000913.3	2869438.0				2869839.0	IS only present in query Strain.	1. DLIS	Complete IS hit.	b2743	L-isoaspartate protein carboxylmethyltransferase type II	-	Intergenic/Pseudo/Repeaed Region	b2743	L-isoaspartate protein carboxylmethyltransferase type II	b2744	broad specificity 5'(3')-nucleotidase and polyphosphatase	4763752.0
1	1						69	2954441	186	200	61	IS30_IS30	2954441	2955661.0	NC_000913.3_art_ISs	2954240.0	2954440.0		2955662.0	2955862.0	NC_000913.3	2871212.0				2871613.0	IS only present in query Strain.	1. DLIS	Complete IS hit.	b2745	tRNA pseudouridine(13) synthase	-	Intergenic/Pseudo/Repeaed Region	b2745	tRNA pseudouridine(13) synthase	b2746	2-C-methyl-D-erythritol 2;4-cyclodiphosphate synthase	4763752.0
1	1						70	2983613	187	200	62	IS30_IS30	2983613	2984833.0	NC_000913.3_art_ISs	2983412.0	2983612.0		2984834.0	2985034.0	NC_000913.3	2899163.0				2899564.0	IS only present in query Strain.	1. DLIS	Complete IS hit.	-	Intergenic/Pseudo/Repeaed Region	b2774	putative deoxygluconate dehydrogenase	b4463	putative FAD-containing dehydrogenase	b2774	putative deoxygluconate dehydrogenase	4763752.0
1	1						71	3057300	188	200	63	IS30_IS30	3057300	3058520.0	NC_000913.3_art_ISs	3057099.0	3057299.0		3058521.0	3058721.0	NC_000913.3	2971629.0				2972030.0	IS only present in query Strain.	1. DLIS	Complete IS hit.	-	Intergenic/Pseudo/Repeaed Region	-	Intergenic/Pseudo/Repeaed Region	b2834	putative NADP(H)-dependent aldo-keto reductase Tas	b2834	putative NADP(H)-dependent aldo-keto reductase Tas	4763752.0
1	1						72	3104435	189	200	64	IS30_IS30	3104435	3105655.0	NC_000913.3_art_ISs	3104234.0	3104434.0		3105656.0	3105856.0	NC_000913.3	3017543.0				3017944.0	IS only present in query Strain.	1. DLIS	Complete IS hit.	-	Intergenic/Pseudo/Repeaed Region	-	Intergenic/Pseudo/Repeaed Region	b2878	putative oxidoreductase; Fe-S subunit	b2878	putative oxidoreductase; Fe-S subunit	4763752.0
1	1						73	3137784	190	200	65	IS30_IS30	3137784	3139004.0	NC_000913.3_art_ISs	3137583.0	3137783.0		3139005.0	3139205.0	NC_000913.3	3049671.0				3050072.0	IS only present in query Strain.	1. DLIS	Complete IS hit.	-	Intergenic/Pseudo/Repeaed Region	-	Intergenic/Pseudo/Repeaed Region	b2905	aminomethyltransferase	b2905	aminomethyltransferase	4763752.0
1	1						74	3161238	191	200	66	IS30_IS30	3161238	3162458.0	NC_000913.3_art_ISs	3161037.0	3161237.0		3162459.0	3162659.0	NC_000913.3	3071904.0				3072305.0	IS only present in query Strain.	1. DLIS	Complete IS hit.	-	Intergenic/Pseudo/Repeaed Region	-	Intergenic/Pseudo/Repeaed Region	b2926	phosphoglycerate kinase	b2926	phosphoglycerate kinase	4763752.0
1	1						75	3226249	192	200	67	IS30_IS30	3226249	3227469.0	NC_000913.3_art_ISs	3226048.0	3226248.0		3227470.0	3227670.0	NC_000913.3	3135694.0				3136095.0	IS only present in query Strain.	1. DLIS	Complete IS hit.	-	Intergenic/Pseudo/Repeaed Region	-	Intergenic/Pseudo/Repeaed Region	b2987	metal phosphate:H(+) symporter PitB	b2987	metal phosphate:H(+) symporter PitB	4763752.0
1	1						76	3361527	193	200	68	IS30_IS30	3361527	3362747.0	NC_000913.3_art_ISs	3361326.0	3361526.0		3362748.0	3362948.0	NC_000913.3	3269751.0				3270152.0	IS only present in query Strain.	1. DLIS	Complete IS hit.	-	Intergenic/Pseudo/Repeaed Region	-	Intergenic/Pseudo/Repeaed Region	-	Intergenic/Pseudo/Repeaed Region	-	Intergenic/Pseudo/Repeaed Region	4763752.0
1	1						77	3386688	194	200	69	IS30_IS30	3386688	3387908.0	NC_000913.3_art_ISs	3386487.0	3386687.0		3387909.0	3388109.0	NC_000913.3	3293691.0				3294092.0	IS only present in query Strain.	1. DLIS	Complete IS hit.	-	Intergenic/Pseudo/Repeaed Region	-	Intergenic/Pseudo/Repeaed Region	b3147	outer membrane lipoprotein - activator of MrcA activity	b3147	outer membrane lipoprotein - activator of MrcA activity	4763752.0
1	1						78	3441448	195	200	70	IS30_IS30	3441448	3442668.0	NC_000913.3_art_ISs	3441247.0	3441447.0		3442669.0	3442869.0	NC_000913.3	3347230.0				3347631.0	IS only present in query Strain.	1. DLIS	Complete IS hit.	-	Intergenic/Pseudo/Repeaed Region	-	Intergenic/Pseudo/Repeaed Region	b3205	RNase adaptor protein	b3205	RNase adaptor protein	4763752.0
1	1						79	3596382	196	200	71	IS30_IS30	3596382	3597602.0	NC_000913.3_art_ISs	3596181.0	3596381.0		3597603.0	3597803.0	NC_000913.3	3500943.0				3501344.0	IS only present in query Strain.	1. DLIS	Complete IS hit.	-	Intergenic/Pseudo/Repeaed Region	b3371	fructoselysine 6-phosphate deglycase	b3370	fructoselysine/psicoselysine transporter	b3371	fructoselysine 6-phosphate deglycase	4763752.0
1	1						80	3615538	197	200	72	IS30_IS30	3615538	3616758.0	NC_000913.3_art_ISs	3615337.0	3615537.0		3616759.0	3616959.0	NC_000913.3	3518878.0				3519279.0	IS only present in query Strain.	1. DLIS	Complete IS hit.	b3390	shikimate kinase 1	-	Intergenic/Pseudo/Repeaed Region	b3390	shikimate kinase 1	-	Intergenic/Pseudo/Repeaed Region	4763752.0
1	1						81	3617769	198	200	73	IS30_IS30	3617769	3618989.0	NC_000913.3_art_ISs	3617568.0	3617768.0		3618990.0	3619190.0	NC_000913.3	3519888.0				3520289.0	IS only present in query Strain.	1. DLIS	Complete IS hit.	-	Intergenic/Pseudo/Repeaed Region	-	Intergenic/Pseudo/Repeaed Region	b3391	DNA utilization protein HofQ	b3391	DNA utilization protein HofQ	4763752.0
1	1						82	3654946	199	200	74	IS30_IS30	3654946	3656166.0	NC_000913.3_art_ISs	3654745.0	3654945.0		3656167.0	3656367.0	NC_000913.3	3555844.0				3556245.0	IS only present in query Strain.	1. DLIS	Complete IS hit.	-	Intergenic/Pseudo/Repeaed Region	-	Intergenic/Pseudo/Repeaed Region	b4475	RNA 3'-terminal phosphate cyclase	b4475	RNA 3'-terminal phosphate cyclase	4763752.0
1	1						83	3658126	200	200	75	IS30_IS30	3658126	3659346.0	NC_000913.3_art_ISs	3657925.0	3658125.0		3659347.0	3659547.0	NC_000913.3	3557803.0				3558204.0	IS only present in query Strain.	1. DLIS	Complete IS hit.	-	Intergenic/Pseudo/Repeaed Region	-	Intergenic/Pseudo/Repeaed Region	b3421	RNA-splicing ligase	-	Intergenic/Pseudo/Repeaed Region	4763752.0
1	1						84	3727323	201	200	76	IS30_IS30	3727323	3728543.0	NC_000913.3_art_ISs	3727122.0	3727322.0		3728544.0	3728744.0	NC_000913.3	3625779.0				3626180.0	IS only present in query Strain.	1. DLIS	Complete IS hit.	-	Intergenic/Pseudo/Repeaed Region	-	Intergenic/Pseudo/Repeaed Region	b3485	ABC transporter family protein YhhJ	b3485	ABC transporter family protein YhhJ	4763752.0
1	1						85	3766127	202	200	77	IS30_IS30	3766127	3767347.0	NC_000913.3_art_ISs	3765926.0	3766126.0		3767348.0	3767548.0	NC_000913.3	3663362.0				3663763.0	IS only present in query Strain.	1. DLIS	Complete IS hit.	b3514	multidrug efflux pump RND permease MdtF	-	Intergenic/Pseudo/Repeaed Region	b3514	multidrug efflux pump RND permease MdtF	-	Intergenic/Pseudo/Repeaed Region	4763752.0
1	1						86	3798695	203	200	78	IS30_IS30	3798695	3799915.0	NC_000913.3_art_ISs	3798494.0	3798694.0		3799916.0	3800116.0	NC_000913.3	3694709.0				3695110.0	IS only present in query Strain.	1. DLIS	Complete IS hit.	-	Intergenic/Pseudo/Repeaed Region	-	Intergenic/Pseudo/Repeaed Region	b3533	cellulose synthase catalytic subunit	b3533	cellulose synthase catalytic subunit	4763752.0
1	1						87	3900620	204	200	79	IS30_IS30	3900620	3901840.0	NC_000913.3_art_ISs	3900419.0	3900619.0		3901841.0	3902041.0	NC_000913.3	3795413.0				3795814.0	IS only present in query Strain.	1. DLIS	Complete IS hit.	-	Intergenic/Pseudo/Repeaed Region	-	Intergenic/Pseudo/Repeaed Region	b3620	ADP-heptose--LPS heptosyltransferase 2	b3620	ADP-heptose--LPS heptosyltransferase 2	4763752.0
1	1						88	4006509	205	200	80	IS30_IS30	4006509	4007729.0	NC_000913.3_art_ISs	4006308.0	4006508.0		4007730.0	4007930.0	NC_000913.3	3900081.0				3900482.0	IS only present in query Strain.	1. DLIS	Complete IS hit.	-	Intergenic/Pseudo/Repeaed Region	-	Intergenic/Pseudo/Repeaed Region	b3719	putative hydrolase YieL	b3719	putative hydrolase YieL	4763752.0
1	1						89	4013286	206	200	81	IS30_IS30	4013286	4014506.0	NC_000913.3_art_ISs	4013085.0	4013285.0		4014507.0	4014707.0	NC_000913.3	3905637.0				3906038.0	IS only present in query Strain.	1. DLIS	Complete IS hit.	-	Intergenic/Pseudo/Repeaed Region	-	Intergenic/Pseudo/Repeaed Region	-	Intergenic/Pseudo/Repeaed Region	b3723	transcriptional antiterminator BglG	4763752.0
1	1						90	4027534	207	200	82	IS30_IS30	4027534	4028754.0	NC_000913.3_art_ISs	4027333.0	4027533.0		4028755.0	4028955.0	NC_000913.3	3918664.0				3919065.0	IS only present in query Strain.	1. DLIS	Complete IS hit.	-	Intergenic/Pseudo/Repeaed Region	-	Intergenic/Pseudo/Repeaed Region	b3734	ATP synthase F1 complex subunit alpha	b3734	ATP synthase F1 complex subunit alpha	4763752.0
1	1						91	4248889	208	200	83	IS30_IS30	4248889	4250109.0	NC_000913.3_art_ISs	4248688.0	4248888.0		4250110.0	4250310.0	NC_000913.3	4138798.0				4139199.0	IS only present in query Strain.	1. DLIS	Complete IS hit.	-	Intergenic/Pseudo/Repeaed Region	b3946	fructose-6-phosphate aldolase 2	b3945	L-1;2-propanediol dehydrogenase/glycerol dehydrogenase	b3946	fructose-6-phosphate aldolase 2	4763752.0
1	1						92	4260696	209	200	84	IS30_IS30	4260696	4261916.0	NC_000913.3_art_ISs	4260495.0	4260695.0		4261917.0	4262117.0	NC_000913.3	4149384.0				4149785.0	IS only present in query Strain.	1. DLIS	Complete IS hit.	-	Intergenic/Pseudo/Repeaed Region	-	Intergenic/Pseudo/Repeaed Region	b3955	phosphoethanolamine transferase EptC	b3955	phosphoethanolamine transferase EptC	4763752.0
1	1						93	4264502	210	200	85	IS30_IS30	4264502	4265722.0	NC_000913.3_art_ISs	4264301.0	4264501.0		4265723.0	4265923.0	NC_000913.3	4151969.0				4152370.0	IS only present in query Strain.	1. DLIS	Complete IS hit.	-	Intergenic/Pseudo/Repeaed Region	-	Intergenic/Pseudo/Repeaed Region	b3956	phosphoenolpyruvate carboxylase	b3956	phosphoenolpyruvate carboxylase	4763752.0
1	1						94	4311821	211	200	86	IS30_IS30	4311821	4313041.0	NC_000913.3_art_ISs	4311620.0	4311820.0		4313042.0	4313242.0	NC_000913.3	4198067.0				4198468.0	IS only present in query Strain.	1. DLIS	Complete IS hit.	-	Intergenic/Pseudo/Repeaed Region	-	Intergenic/Pseudo/Repeaed Region	b3997	uroporphyrinogen decarboxylase	b3997	uroporphyrinogen decarboxylase	4763752.0
1	1						95	4389275	212	200	87	IS30_IS30	4389275	4390495.0	NC_000913.3_art_ISs	4389074.0	4389274.0		4390496.0	4390696.0	NC_000913.3	4274300.0				4274701.0	IS only present in query Strain.	1. DLIS	Complete IS hit.	-	Intergenic/Pseudo/Repeaed Region	-	Intergenic/Pseudo/Repeaed Region	b4059	ssDNA-binding protein	-	Intergenic/Pseudo/Repeaed Region	4763752.0
1	1						96	4434397	213	200	88	IS30_IS30	4434397	4435617.0	NC_000913.3_art_ISs	4434196.0	4434396.0		4435618.0	4435818.0	NC_000913.3	4318201.0				4318602.0	IS only present in query Strain.	1. DLIS	Complete IS hit.	-	Intergenic/Pseudo/Repeaed Region	-	Intergenic/Pseudo/Repeaed Region	b4097	carbon-phosphorus lyase subunit PhnK	b4097	carbon-phosphorus lyase subunit PhnK	4763752.0
	1			1			97	4461112	214	200	102	IS30_IS30	4461112	4461482.0	NC_000913.3_art_ISs	4460911.0	4461111.0		4461483.0	4461683.0							IS only present in query Strain.	2. Verify manually, possible false positive caused by consecutive ISs.	Partial IS hit.	-	Intergenic/Pseudo/Repeaed Region	-	Intergenic/Pseudo/Repeaed Region	-	-	-	-	4763752.0
	1			1			98	4461481	215	200	103	IS30_IS30	4461481	4462701.0	NC_000913.3_art_ISs	4461280.0	4461480.0		4462702.0	4462902.0	NC_000913.3	271192.0				271593.0	IS only present in query Strain.	2. Verify manually, possible false positive caused by consecutive ISs.	Complete IS hit.	-	Intergenic/Pseudo/Repeaed Region	-	Intergenic/Pseudo/Repeaed Region	b0256	IS30 transposase	b0256	IS30 transposase	4763752.0
1	1						99	4509587	216	200	89	IS30_IS30	4509587	4510807.0	NC_000913.3_art_ISs	4509386.0	4509586.0		4510808.0	4511008.0	NC_000913.3	4389728.0				4390129.0	IS only present in query Strain.	1. DLIS	Complete IS hit.	-	Intergenic/Pseudo/Repeaed Region	-	Intergenic/Pseudo/Repeaed Region	b4160	phosphatidylserine decarboxylase proenzyme	b4160	phosphatidylserine decarboxylase proenzyme	4763752.0
1	1						100	4524761	217	200	90	IS30_IS30	4524761	4525981.0	NC_000913.3_art_ISs	4524560.0	4524760.0		4525982.0	4526182.0	NC_000913.3	4403681.0				4404082.0	IS only present in query Strain.	1. DLIS	Complete IS hit.	-	Intergenic/Pseudo/Repeaed Region	-	Intergenic/Pseudo/Repeaed Region	b4175	regulator of FtsH protease	b4175	regulator of FtsH protease	4763752.0
			1						218	200	92	IS30_IS30	249701	250822.0	NC_000913.3_art_ISs	249500.0	249700.0		250823.0	251023.0	NC_000913.3	1469294.0	1469496.0				IS only present in query Strain.	2. Verify manually, possible false positive caused by consecutive ISs.	Partial IS hit.	-	Intergenic/Pseudo/Repeaed Region	-	Intergenic/Pseudo/Repeaed Region	b4492	putative outer membrane protein; N-terminal fragment	-	-	4763752.0
			1						219	200	93	ISEc1_ISAs1	736682	737971.0	NC_000913.3_art_ISs	763343.0				763763.0	NC_000913.3	736481.0	736681.0		737972.0	738172.0	IS only present in ref Strain.	2. Verify manually, possible false positive caused by consecutive ISs.	Complete IS hit.	b4514	inactive transposase YbfQ	b0705	putative transposase YbfL	b0681	chitobiose outer membrane channel	b0684	flavodoxin 1	4641652.0
			1						220	200	94	ISEc1_ISAs1	763544	764833.0	NC_000913.3_art_ISs	763343.0	763543.0		764834.0	765034.0	NC_000913.3	736481.0				736901.0	IS only present in query Strain.	2. Verify manually, possible false positive caused by consecutive ISs.	Complete IS hit.	b4514	inactive transposase YbfQ	b0706	H repeat-associated putative transposase YbfD	b4514	inactive transposase YbfQ	b0705	putative transposase YbfL	4763752.0
			1						221	200	100	IS30_IS30	2316971	2317566.0	NC_000913.3_art_ISs	2316770.0	2316970.0		2317567.0	2317767.0							IS only present in query Strain.	2. Verify manually, possible false positive caused by consecutive ISs.	Partial IS hit.	-	Intergenic/Pseudo/Repeaed Region	-	Intergenic/Pseudo/Repeaed Region	-	-	-	-	4763752.0
			1						222	200	101	IS30_IS30	2317567	2317964.0	NC_000913.3_art_ISs	2317366.0	2317566.0		2317965.0	2318165.0							IS only present in query Strain.	2. Verify manually, possible false positive caused by consecutive ISs.	Partial IS hit.	-	Intergenic/Pseudo/Repeaed Region	-	Intergenic/Pseudo/Repeaed Region	-	-	-	-	4763752.0
			1						223	200	104	IS30_IS30	4462702	4463553.0	NC_000913.3_art_ISs	4462501.0	4462701.0		4463554.0	4463754.0	NC_000913.3	1469295.0	1469496.0				IS only present in query Strain.	2. Verify manually, possible false positive caused by consecutive ISs.	Partial IS hit.	-	Intergenic/Pseudo/Repeaed Region	-	Intergenic/Pseudo/Repeaed Region	b4492	putative outer membrane protein; N-terminal fragment	-	-	4763752.0
			1						224	200	105	ISEc52_IS3_IS3	271762	272190.0	NC_000913.3_art_ISs	1317893.0	1318097.0				NC_000913.3	271561.0	271761.0		272191.0	272391.0	IS only present in ref Strain.	5. Discarded for analysis. There were multiple blastn hits, and left and right pairs could not be determined.	Partial IS hit.	-	Intergenic/Pseudo/Repeaed Region	-	-	b0243	glutamate-5-semialdehyde dehydrogenase	b0243	glutamate-5-semialdehyde dehydrogenase	4641652.0
			1						225	200	106	IS2_IS2_IS3	399833	400905.0	NC_000913.3_art_ISs	399632.0	399832.0		400906.0	401106.0	NC_000913.3	1469289.0	1469496.0				IS only present in query Strain.	5. Discarded for analysis. There were multiple blastn hits, and left and right pairs could not be determined.	Partial IS hit.	-	Intergenic/Pseudo/Repeaed Region	b0363	putative glucosyltransferase	b4492	putative outer membrane protein; N-terminal fragment	-	-	4763752.0
91	99	0	8	9	1	*			226	200
1	1						1	446	227	300	0	IS30_IS30	446	1666.0	NC_000913.3_art_ISs	145.0	445.0		1667.0	1967.0	NC_000913.3	145.0				746.0	IS only present in query Strain.	1. DLIS	Complete IS hit.	-	Intergenic/Pseudo/Repeaed Region	-	Intergenic/Pseudo/Repeaed Region	-	Intergenic/Pseudo/Repeaed Region	b0002	fused aspartate kinase/homoserine dehydrogenase 1	4763752.0
1	1						2	3160	228	300	1	IS30_IS30	3160	4380.0	NC_000913.3_art_ISs	2859.0	3159.0		4381.0	4681.0	NC_000913.3	1638.0				2239.0	IS only present in query Strain.	1. DLIS	Complete IS hit.	-	Intergenic/Pseudo/Repeaed Region	-	Intergenic/Pseudo/Repeaed Region	b0002	fused aspartate kinase/homoserine dehydrogenase 1	b0002	fused aspartate kinase/homoserine dehydrogenase 1	4763752.0
1	1						3	123711	229	300	2	IS30_IS30	123711	124931.0	NC_000913.3_art_ISs	123410.0	123710.0		124932.0	125232.0	NC_000913.3	120968.0				121569.0	IS only present in query Strain.	1. DLIS	Complete IS hit.	-	Intergenic/Pseudo/Repeaed Region	-	Intergenic/Pseudo/Repeaed Region	b0112	aromatic amino acid:H(+) symporter AroP	-	Intergenic/Pseudo/Repeaed Region	4763752.0
1	1						4	142989	230	300	3	IS30_IS30	142989	144209.0	NC_000913.3_art_ISs	142688.0	142988.0		144210.0	144510.0	NC_000913.3	139025.0				139626.0	IS only present in query Strain.	1. DLIS	Complete IS hit.	-	Intergenic/Pseudo/Repeaed Region	-	Intergenic/Pseudo/Repeaed Region	b0124	quinoprotein glucose dehydrogenase	b0124	quinoprotein glucose dehydrogenase	4763752.0
1	1						5	163498	231	300	4	IS30_IS30	163498	164718.0	NC_000913.3_art_ISs	163197.0	163497.0		164719.0	165019.0	NC_000913.3	158313.0				158914.0	IS only present in query Strain.	1. DLIS	Complete IS hit.	-	Intergenic/Pseudo/Repeaed Region	-	Intergenic/Pseudo/Repeaed Region	b0143	poly(A) polymerase I	b0143	poly(A) polymerase I	4763752.0
1	1						6	240046	232	300	5	IS30_IS30	240046	241266.0	NC_000913.3_art_ISs	239745.0	240045.0		241267.0	241567.0	NC_000913.3	233640.0				234241.0	IS only present in query Strain.	1. DLIS	Complete IS hit.	-	Intergenic/Pseudo/Repeaed Region	b0212	hydroxyacylglutathione hydrolase GloB	b0211	membrane-bound lytic murein transglycosylase D	b0212	hydroxyacylglutathione hydrolase GloB	4763752.0
				1	1		7	248381	233	300
	1			1			8	248480	234	300	91	IS30_IS30	248480	249700.0	NC_000913.3_art_ISs	248179.0	248479.0		249701.0	250001.0							IS only present in query Strain.	2. Verify manually, possible false positive caused by consecutive ISs.		-	Intergenic/Pseudo/Repeaed Region	-	Intergenic/Pseudo/Repeaed Region	-	-	-	-	4763752.0
1	1						9	310515	235	300	6	IS30_IS30	310515	311735.0	NC_000913.3_art_ISs	310214.0	310514.0		311736.0	312036.0	NC_000913.3	300446.0				301047.0	IS only present in query Strain.	1. DLIS	Complete IS hit.	-	Intergenic/Pseudo/Repeaed Region	b0285	aldehyde dehydrogenase; FAD-binding subunit	b0284	aldehyde dehydrogenase: molybdenum cofactor-binding subunit	b0285	aldehyde dehydrogenase; FAD-binding subunit	4763752.0
1	1						10	315801	236	300	7	IS30_IS30	315801	317021.0	NC_000913.3_art_ISs	315500.0	315800.0		317022.0	317322.0	NC_000913.3	304511.0				305112.0	IS only present in query Strain.	1. DLIS	Complete IS hit.	-	Intergenic/Pseudo/Repeaed Region	-	Intergenic/Pseudo/Repeaed Region	b0289	putative fimbrial chaperone EcpE	b0289	putative fimbrial chaperone EcpE	4763752.0
1	1						11	333734	237	300	8	IS30_IS30	333734	334954.0	NC_000913.3_art_ISs	333433.0	333733.0		334955.0	335255.0	NC_000913.3	321223.0				321824.0	IS only present in query Strain.	1. DLIS	Complete IS hit.	-	Intergenic/Pseudo/Repeaed Region	b0306	putative lactate utilization oxidoreductase YkgE	-	Intergenic/Pseudo/Repeaed Region	b0306	putative lactate utilization oxidoreductase YkgE	4763752.0
1	1						12	356194	238	300	9	IS30_IS30	356194	357414.0	NC_000913.3_art_ISs	355893.0	356193.0		357415.0	357715.0	NC_000913.3	342462.0				343063.0	IS only present in query Strain.	1. DLIS	Complete IS hit.	b0324	putative deaminase with metallo-dependent hydrolase domain	b0325	aldehyde reductase; NADPH-dependent	b0324	putative deaminase with metallo-dependent hydrolase domain	b0325	aldehyde reductase; NADPH-dependent	4763752.0
1	1						13	361260	239	300	10	IS30_IS30	361260	362480.0	NC_000913.3_art_ISs	360959.0	361259.0		362481.0	362781.0	NC_000913.3	346307.0				346908.0	IS only present in query Strain.	1. DLIS	Complete IS hit.	b0328	putative amino acid exporter	b0330	DNA-binding transcriptional dual regulator PrpR	b0328	putative amino acid exporter	b0330	DNA-binding transcriptional dual regulator PrpR	4763752.0
1	1						14	395877	240	300	11	IS30_IS30	395877	397097.0	NC_000913.3_art_ISs	395576.0	395876.0		397098.0	397398.0	NC_000913.3	379703.0				380304.0	IS only present in query Strain.	1. DLIS	Complete IS hit.	b0357	DNA-binding transcriptional repressor FrmR	b0358	outer membrane protein YaiO	b0357	DNA-binding transcriptional repressor FrmR	b0358	outer membrane protein YaiO	4763752.0
1	1						15	398612	241	300	12	IS30_IS30	398612	399832.0	NC_000913.3_art_ISs	398311.0	398611.0		399833.0	400133.0	NC_000913.3	381217.0				381818.0	IS only present in query Strain.	1. DLIS	Complete IS hit.	-	Intergenic/Pseudo/Repeaed Region	b0361	IS2 element protein	b4579	putative acyltransferase; N-terminal fragment	b0361	IS2 element protein	4763752.0
1	1						16	458588	242	300	13	IS30_IS30	458588	459808.0	NC_000913.3_art_ISs	458287.0	458587.0		459809.0	460109.0	NC_000913.3	439972.0				440573.0	IS only present in query Strain.	1. DLIS	Complete IS hit.	b0420	1-deoxy-D-xylulose-5-phosphate synthase	-	Intergenic/Pseudo/Repeaed Region	b0420	1-deoxy-D-xylulose-5-phosphate synthase	b0421	geranyl diphosphate/farnesyl diphosphate synthase	4763752.0
1	1						17	515332	243	300	14	IS30_IS30	515332	516552.0	NC_000913.3_art_ISs	515031.0	515331.0		516553.0	516853.0	NC_000913.3	495495.0				496096.0	IS only present in query Strain.	1. DLIS	Complete IS hit.	-	Intergenic/Pseudo/Repeaed Region	-	Intergenic/Pseudo/Repeaed Region	b0473	chaperone protein HtpG	b0473	chaperone protein HtpG	4763752.0
1	1						18	518331	244	300	15	IS30_IS30	518331	519551.0	NC_000913.3_art_ISs	518030.0	518330.0		519552.0	519852.0	NC_000913.3	497273.0				497874.0	IS only present in query Strain.	1. DLIS	Complete IS hit.	-	Intergenic/Pseudo/Repeaed Region	-	Intergenic/Pseudo/Repeaed Region	b0474	adenylate kinase	-	Intergenic/Pseudo/Repeaed Region	4763752.0
1	1						19	564278	245	300	16	IS30_IS30	564278	565498.0	NC_000913.3_art_ISs	563977.0	564277.0		565499.0	565799.0	NC_000913.3	541999.0				542600.0	IS only present in query Strain.	1. DLIS	Complete IS hit.	-	Intergenic/Pseudo/Repeaed Region	-	Intergenic/Pseudo/Repeaed Region	b0514	glycerate 2-kinase 2	b0514	glycerate 2-kinase 2	4763752.0
1	1						20	638410	246	300	17	IS30_IS30	638410	639630.0	NC_000913.3_art_ISs	638109.0	638409.0		639631.0	639931.0	NC_000913.3	614910.0				615511.0	IS only present in query Strain.	1. DLIS	Complete IS hit.	-	Intergenic/Pseudo/Repeaed Region	-	Intergenic/Pseudo/Repeaed Region	b0586	apo-serine activating enzyme	b0586	apo-serine activating enzyme	4763752.0
1	1						21	643571	247	300	18	IS30_IS30	643571	644791.0	NC_000913.3_art_ISs	643270.0	643570.0		644792.0	645092.0	NC_000913.3	618850.0				619451.0	IS only present in query Strain.	1. DLIS	Complete IS hit.	-	Intergenic/Pseudo/Repeaed Region	b0588	ferric enterobactin ABC transporter ATP binding subunit	b0587	polysaccharide co-polymerase family protein FepE	b0588	ferric enterobactin ABC transporter ATP binding subunit	4763752.0
1	1						22	709250	248	300	19	IS30_IS30	709250	710470.0	NC_000913.3_art_ISs	708949.0	709249.0		710471.0	710771.0	NC_000913.3	683308.0				683909.0	IS only present in query Strain.	1. DLIS	Complete IS hit.	b0650	chaperone protein HscC	-	Intergenic/Pseudo/Repeaed Region	b0650	chaperone protein HscC	b0651	pyrimidine-specific ribonucleoside hydrolase RihA	4763752.0
1	1						23	780879	249	300	20	IS30_IS30	780879	782099.0	NC_000913.3_art_ISs	780578.0	780878.0		782100.0	782400.0	NC_000913.3	753716.0				754317.0	IS only present in query Strain.	1. DLIS	Complete IS hit.	-	Intergenic/Pseudo/Repeaed Region	-	Intergenic/Pseudo/Repeaed Region	b0720	citrate synthase	b0720	citrate synthase	4763752.0
1	1						24	794533	250	300	21	IS30_IS30	794533	795753.0	NC_000913.3_art_ISs	794232.0	794532.0		795754.0	796054.0	NC_000913.3	766149.0				766750.0	IS only present in query Strain.	1. DLIS	Complete IS hit.	-	Intergenic/Pseudo/Repeaed Region	-	Intergenic/Pseudo/Repeaed Region	b0731	2-O-alpha-mannosyl-D-glycerate specific PTS enzyme II	b0731	2-O-alpha-mannosyl-D-glycerate specific PTS enzyme II	4763752.0
1	1						25	818746	251	300	22	IS30_IS30	818746	819966.0	NC_000913.3_art_ISs	818445.0	818745.0		819967.0	820267.0	NC_000913.3	789141.0				789742.0	IS only present in query Strain.	1. DLIS	Complete IS hit.	-	Intergenic/Pseudo/Repeaed Region	-	Intergenic/Pseudo/Repeaed Region	b0757	galactokinase	b0757	galactokinase	4763752.0
1	1						26	827842	252	300	23	IS30_IS30	827842	829062.0	NC_000913.3_art_ISs	827541.0	827841.0		829063.0	829363.0	NC_000913.3	797016.0				797617.0	IS only present in query Strain.	1. DLIS	Complete IS hit.	-	Intergenic/Pseudo/Repeaed Region	b0766	pyridoxal phosphate/fructose-1;6-bisphosphate phosphatase	b0765	molybdate ABC transporter ATP binding subunit	b0766	pyridoxal phosphate/fructose-1;6-bisphosphate phosphatase	4763752.0
1	1						27	840349	253	300	24	IS30_IS30	840349	841569.0	NC_000913.3_art_ISs	840048.0	840348.0		841570.0	841870.0	NC_000913.3	808302.0				808903.0	IS only present in query Strain.	1. DLIS	Complete IS hit.	-	Intergenic/Pseudo/Repeaed Region	-	Intergenic/Pseudo/Repeaed Region	b0774	adenosylmethionine-8-amino-7-oxononanoate aminotransferase	b0774	adenosylmethionine-8-amino-7-oxononanoate aminotransferase	4763752.0
1	1						28	866245	254	300	25	IS30_IS30	866245	867465.0	NC_000913.3_art_ISs	865944.0	866244.0		867466.0	867766.0	NC_000913.3	832977.0				833578.0	IS only present in query Strain.	1. DLIS	Complete IS hit.	-	Intergenic/Pseudo/Repeaed Region	-	Intergenic/Pseudo/Repeaed Region	-	Intergenic/Pseudo/Repeaed Region	b0799	ATP-dependent DNA helicase DinG	4763752.0
1	1						29	885800	255	300	26	IS30_IS30	885800	887020.0	NC_000913.3_art_ISs	885499.0	885799.0		887021.0	887321.0	NC_000913.3	851311.0				851912.0	IS only present in query Strain.	1. DLIS	Complete IS hit.	-	Intergenic/Pseudo/Repeaed Region	-	Intergenic/Pseudo/Repeaed Region	b0815	phosphoethanolamine transferase	b0815	phosphoethanolamine transferase	4763752.0
1	1						30	1054897	256	300	27	IS30_IS30	1054897	1056117.0	NC_000913.3_art_ISs	1054596.0	1054896.0		1056118.0	1056418.0	NC_000913.3	1019187.0				1019788.0	IS only present in query Strain.	1. DLIS	Complete IS hit.	-	Intergenic/Pseudo/Repeaed Region	-	Intergenic/Pseudo/Repeaed Region	b0957	outer membrane porin A	b0957	outer membrane porin A	4763752.0
1	1						31	1102873	257	300	28	IS30_IS30	1102873	1104093.0	NC_000913.3_art_ISs	1102572.0	1102872.0		1104094.0	1104394.0	NC_000913.3	1065942.0				1066543.0	IS only present in query Strain.	1. DLIS	Complete IS hit.	-	Intergenic/Pseudo/Repeaed Region	-	Intergenic/Pseudo/Repeaed Region	b1002	glucose-1-phosphatase	b1002	glucose-1-phosphatase	4763752.0
1	1						32	1118119	258	300	29	IS30_IS30	1118119	1119339.0	NC_000913.3_art_ISs	1117818.0	1118118.0		1119340.0	1119640.0	NC_000913.3	1079967.0				1080568.0	IS only present in query Strain.	1. DLIS	Complete IS hit.	-	Intergenic/Pseudo/Repeaed Region	-	Intergenic/Pseudo/Repeaed Region	b1015	proline:Na(+) symporter	b1015	proline:Na(+) symporter	4763752.0
1	1						33	1150109	259	300	30	IS30_IS30	1150109	1151329.0	NC_000913.3_art_ISs	1149808.0	1150108.0		1151330.0	1151630.0	NC_000913.3	1110736.0				1111337.0	IS only present in query Strain.	1. DLIS	Complete IS hit.	b1048	osmoregulated periplasmic glucans (OPGs) biosynthesis protein G	-	Intergenic/Pseudo/Repeaed Region	b1048	osmoregulated periplasmic glucans (OPGs) biosynthesis protein G	b1049	osmoregulated periplasmic glucans (OPGs) biosynthesis protein H	4763752.0
1	1						34	1165669	260	300	31	IS30_IS30	1165669	1166889.0	NC_000913.3_art_ISs	1165368.0	1165668.0		1166890.0	1167190.0	NC_000913.3	1125075.0				1125676.0	IS only present in query Strain.	1. DLIS	Complete IS hit.	b1065	multidrug efflux pump MdtH	b1066	ribosomal-protein-S5-alanine N-acetyltransferase	b1065	multidrug efflux pump MdtH	b1066	ribosomal-protein-S5-alanine N-acetyltransferase	4763752.0
1	1						35	1252656	261	300	32	IS30_IS30	1252656	1253876.0	NC_000913.3_art_ISs	1252355.0	1252655.0		1253877.0	1254177.0	NC_000913.3	1210841.0				1211442.0	IS only present in query Strain.	1. DLIS	Complete IS hit.	-	Intergenic/Pseudo/Repeaed Region	b4519	protein IcdC	b1159	e14 prophage; 5-methylcytosine-specific restriction enzyme McrA	b4519	protein IcdC	4763752.0
1	1						36	1314729	262	300	33	IS30_IS30	1314729	1315949.0	NC_000913.3_art_ISs	1314428.0	1314728.0		1315950.0	1316250.0	NC_000913.3	1271693.0				1272294.0	IS only present in query Strain.	1. DLIS	Complete IS hit.	b1216	Na(+)/K(+):H(+) antiporter ChaA	b1217	putative cation transport regulator ChaB	b1216	Na(+)/K(+):H(+) antiporter ChaA	b1217	putative cation transport regulator ChaB	4763752.0
1	1						37	1316873	263	300	34	IS30_IS30	1316873	1318093.0	NC_000913.3_art_ISs	1316572.0	1316872.0		1318094.0	1318394.0	NC_000913.3	1272616.0				1273217.0	IS only present in query Strain.	1. DLIS	Complete IS hit.	-	Intergenic/Pseudo/Repeaed Region	-	Intergenic/Pseudo/Repeaed Region	b1218	glutathione-specific gamma-glutamylcyclotransferase	-	Intergenic/Pseudo/Repeaed Region	4763752.0
1	1						38	1332696	264	300	35	IS30_IS30	1332696	1333916.0	NC_000913.3_art_ISs	1332395.0	1332695.0		1333917.0	1334217.0	NC_000913.3	1287218.0				1287819.0	IS only present in query Strain.	1. DLIS	Complete IS hit.	-	Intergenic/Pseudo/Repeaed Region	b1232	formyltetrahydrofolate deformylase	-	Intergenic/Pseudo/Repeaed Region	b1232	formyltetrahydrofolate deformylase	4763752.0
1	1						39	1477755	265	300	36	IS30_IS30	1477755	1478975.0	NC_000913.3_art_ISs	1477454.0	1477754.0		1478976.0	1479276.0	NC_000913.3	1431056.0				1431657.0	IS only present in query Strain.	1. DLIS	Complete IS hit.	-	Intergenic/Pseudo/Repeaed Region	-	Intergenic/Pseudo/Repeaed Region	b1372	Rac prophage; putative membrane protein	b1372	Rac prophage; putative membrane protein	4763752.0
1	1						40	1530090	266	300	37	IS30_IS30	1530090	1531310.0	NC_000913.3_art_ISs	1529789.0	1530089.0		1531311.0	1531611.0	NC_000913.3	1482170.0				1482771.0	IS only present in query Strain.	1. DLIS	Complete IS hit.	b1411	putative phosphatase	-	Intergenic/Pseudo/Repeaed Region	b1411	putative phosphatase	b1412	FMN dependent NADH:quinone oxidoreductase	4763752.0
1	1						41	1599338	267	300	38	IS30_IS30	1599338	1600558.0	NC_000913.3_art_ISs	1599037.0	1599337.0		1600559.0	1600859.0	NC_000913.3	1550197.0				1550798.0	IS only present in query Strain.	1. DLIS	Complete IS hit.	b1474	formate dehydrogenase N subunit alpha	-	Intergenic/Pseudo/Repeaed Region	b1474	formate dehydrogenase N subunit alpha	b1475	formate dehydrogenase N subunit beta	4763752.0
1	1						42	1601001	268	300	39	IS30_IS30	1601001	1602221.0	NC_000913.3_art_ISs	1600700.0	1601000.0		1602222.0	1602522.0	NC_000913.3	1550639.0				1551240.0	IS only present in query Strain.	1. DLIS	Complete IS hit.	-	Intergenic/Pseudo/Repeaed Region	-	Intergenic/Pseudo/Repeaed Region	b1475	formate dehydrogenase N subunit beta	b1475	formate dehydrogenase N subunit beta	4763752.0
1	1						43	1614176	269	300	40	IS30_IS30	1614176	1615396.0	NC_000913.3_art_ISs	1613875.0	1614175.0		1615397.0	1615697.0	NC_000913.3	1562593.0				1563194.0	IS only present in query Strain.	1. DLIS	Complete IS hit.	-	Intergenic/Pseudo/Repeaed Region	-	Intergenic/Pseudo/Repeaed Region	b1488	D-alanyl-D-alanine dipeptidase	-	Intergenic/Pseudo/Repeaed Region	4763752.0
1	1						44	1700984	270	300	41	IS30_IS30	1700984	1702204.0	NC_000913.3_art_ISs	1700683.0	1700983.0		1702205.0	1702505.0	NC_000913.3	1648180.0				1648781.0	IS only present in query Strain.	1. DLIS	Complete IS hit.	b1570	DNA-binding transcriptional dual regulator DicA	b1572	Qin prophage; uncharacterized protein YdfB	b1570	DNA-binding transcriptional dual regulator DicA	b1572	Qin prophage; uncharacterized protein YdfB	4763752.0
1	1						45	1724977	271	300	42	IS30_IS30	1724977	1726197.0	NC_000913.3_art_ISs	1724676.0	1724976.0		1726198.0	1726498.0	NC_000913.3	1670952.0				1671553.0	IS only present in query Strain.	1. DLIS	Complete IS hit.	b1596	putative transporter YnfM	b1597	acid shock protein	b1596	putative transporter YnfM	b1597	acid shock protein	4763752.0
1	1						46	1739082	272	300	43	IS30_IS30	1739082	1740302.0	NC_000913.3_art_ISs	1738781.0	1739081.0		1740303.0	1740603.0	NC_000913.3	1683836.0				1684437.0	IS only present in query Strain.	1. DLIS	Complete IS hit.	-	Intergenic/Pseudo/Repeaed Region	b1610	DNA replication terminus site-binding protein	b1609	sensory histidine kinase RstB	b1610	DNA replication terminus site-binding protein	4763752.0
1	1						47	1744580	273	300	44	IS30_IS30	1744580	1745800.0	NC_000913.3_art_ISs	1744279.0	1744579.0		1745801.0	1746101.0	NC_000913.3	1688113.0				1688714.0	IS only present in query Strain.	1. DLIS	Complete IS hit.	b1612	fumarase A	b1613	mannose-6-phosphate isomerase	b1612	fumarase A	b1613	mannose-6-phosphate isomerase	4763752.0
1	1						48	1763370	274	300	45	IS30_IS30	1763370	1764590.0	NC_000913.3_art_ISs	1763069.0	1763369.0		1764591.0	1764891.0	NC_000913.3	1705682.0				1706283.0	IS only present in query Strain.	1. DLIS	Complete IS hit.	b1626	conserved inner membrane protein YdgK	-	Intergenic/Pseudo/Repeaed Region	b1626	conserved inner membrane protein YdgK	b1627	SoxR [2Fe-2S] reducing system protein RsxA	4763752.0
1	1						49	1767126	275	300	46	IS30_IS30	1767126	1768346.0	NC_000913.3_art_ISs	1766825.0	1767125.0		1768347.0	1768647.0	NC_000913.3	1708217.0				1708818.0	IS only present in query Strain.	1. DLIS	Complete IS hit.	-	Intergenic/Pseudo/Repeaed Region	-	Intergenic/Pseudo/Repeaed Region	b1629	SoxR [2Fe-2S] reducing system protein RsxC	b1629	SoxR [2Fe-2S] reducing system protein RsxC	4763752.0
1	1						50	1803050	276	300	47	IS30_IS30	1803050	1804270.0	NC_000913.3_art_ISs	1802749.0	1803049.0		1804271.0	1804571.0	NC_000913.3	1742920.0				1743521.0	IS only present in query Strain.	1. DLIS	Complete IS hit.	-	Intergenic/Pseudo/Repeaed Region	b1663	multidrug efflux pump MdtK	b1662	riboflavin synthase	b1663	multidrug efflux pump MdtK	4763752.0
	1			1			51	1869279	277	300	95	IS30_IS30	1869279	1870499.0	NC_000913.3_art_ISs	1868978.0	1869278.0		1870500.0	1870800.0	NC_000913.3	1470236.0	1470522.0				IS only present in query Strain.	2. Verify manually, possible false positive caused by consecutive ISs.		-	Intergenic/Pseudo/Repeaed Region	-	Intergenic/Pseudo/Repeaed Region	b4492	putative outer membrane protein; N-terminal fragment	-	-	4763752.0
	1			1			52	1870520	278	300	96	IS30_IS30	1870520	1871740.0	NC_000913.3_art_ISs	1870219.0	1870519.0		1871741.0	1872041.0	NC_000913.3	1470236.0	1470521.0				IS only present in query Strain.	2. Verify manually, possible false positive caused by consecutive ISs.		-	Intergenic/Pseudo/Repeaed Region	-	Intergenic/Pseudo/Repeaed Region	b4492	putative outer membrane protein; N-terminal fragment	-	-	4763752.0
1	1						53	1904586	279	300	48	IS30_IS30	1904586	1905806.0	NC_000913.3_art_ISs	1904285.0	1904585.0		1905807.0	1906107.0	NC_000913.3	1840793.0				1841394.0	IS only present in query Strain.	1. DLIS	Complete IS hit.	-	Intergenic/Pseudo/Repeaed Region	-	Intergenic/Pseudo/Repeaed Region	b1758	putative phosphatidyl transferase; inner membrane protein	b1758	putative phosphatidyl transferase; inner membrane protein	4763752.0
1	1						54	1932848	280	300	49	IS30_IS30	1932848	1934068.0	NC_000913.3_art_ISs	1932547.0	1932847.0		1934069.0	1934369.0	NC_000913.3	1867834.0				1868435.0	IS only present in query Strain.	1. DLIS	Complete IS hit.	-	Intergenic/Pseudo/Repeaed Region	-	Intergenic/Pseudo/Repeaed Region	b1783	protein kinase YeaG	b1783	protein kinase YeaG	4763752.0
1	1						55	1937860	281	300	50	IS30_IS30	1937860	1939080.0	NC_000913.3_art_ISs	1937559.0	1937859.0		1939081.0	1939381.0	NC_000913.3	1871625.0				1872226.0	IS only present in query Strain.	1. DLIS	Complete IS hit.	b1785	putative c-di-GMP binding protein CdgI	b1786	putative diguanylate cyclase DgcJ	b1785	putative c-di-GMP binding protein CdgI	b1786	putative diguanylate cyclase DgcJ	4763752.0
1	1						56	2146825	282	300	51	IS30_IS30	2146825	2148045.0	NC_000913.3_art_ISs	2146524.0	2146824.0		2148046.0	2148346.0	NC_000913.3	2079369.0				2079970.0	IS only present in query Strain.	1. DLIS	Complete IS hit.	-	Intergenic/Pseudo/Repeaed Region	-	Intergenic/Pseudo/Repeaed Region	-	Intergenic/Pseudo/Repeaed Region	b2008	putative transporter YeeA	4763752.0
1	1						57	2291220	283	300	52	IS30_IS30	2291220	2292440.0	NC_000913.3_art_ISs	2290919.0	2291219.0		2292441.0	2292741.0	NC_000913.3	2222543.0				2223144.0	IS only present in query Strain.	1. DLIS	Complete IS hit.	-	Intergenic/Pseudo/Repeaed Region	-	Intergenic/Pseudo/Repeaed Region	b2133	D-lactate dehydrogenase	b2133	D-lactate dehydrogenase	4763752.0
1	1						58	2302324	284	300	53	IS30_IS30	2302324	2303544.0	NC_000913.3_art_ISs	2302023.0	2302323.0		2303545.0	2303845.0	NC_000913.3	2232426.0				2233027.0	IS only present in query Strain.	1. DLIS	Complete IS hit.	-	Intergenic/Pseudo/Repeaed Region	b2144	DUF218 domain-containing protein SanA	b2143	cytidine/deoxycytidine deaminase	b2144	DUF218 domain-containing protein SanA	4763752.0
1	1						59	2305151	285	300	54	IS30_IS30	2305151	2306371.0	NC_000913.3_art_ISs	2304850.0	2305150.0		2306372.0	2306672.0	NC_000913.3	2234032.0				2234633.0	IS only present in query Strain.	1. DLIS	Complete IS hit.	-	Intergenic/Pseudo/Repeaed Region	-	Intergenic/Pseudo/Repeaed Region	b2146	NAD-dependent dihydropyrimidine dehydrogenase subunit PreT	b2146	NAD-dependent dihydropyrimidine dehydrogenase subunit PreT	4763752.0
	1			1			60	2314302	286	300	97	IS30_IS30	2314302	2315125.0	NC_000913.3_art_ISs	2314001.0	2314301.0		2315126.0	2315426.0							IS only present in query Strain.	2. Verify manually, possible false positive caused by consecutive ISs.	Partial IS hit.	-	Intergenic/Pseudo/Repeaed Region	-	Intergenic/Pseudo/Repeaed Region	-	-	-	-	4763752.0
	1			1			61	2315125	287	300	98	IS30_IS30	2315125	2315756.0	NC_000913.3_art_ISs	2314824.0	2315124.0		2315757.0	2316057.0	NC_000913.3	4507458.0	4507759.0		4507981.0	4508282.0	IS only present in query Strain.	2. Verify manually, possible false positive caused by consecutive ISs.	Partial IS hit.	-	Intergenic/Pseudo/Repeaed Region	-	Intergenic/Pseudo/Repeaed Region	b4284	KpLE2 phage-like element; IS30 transposase	-	-	4763752.0
	1			1			62	2315757	288	300	99	IS30_IS30	2315757	2316977.0	NC_000913.3_art_ISs	2315456.0	2315756.0		2316978.0	2317278.0	NC_000913.3	270872.0				271473.0	IS only present in query Strain.	2. Verify manually, possible false positive caused by consecutive ISs.	Complete IS hit.	-	Intergenic/Pseudo/Repeaed Region	-	Intergenic/Pseudo/Repeaed Region	b0256	IS30 transposase	b0256	IS30 transposase	4763752.0
1	1						63	2331004	289	300	55	IS30_IS30	2331004	2332224.0	NC_000913.3_art_ISs	2330703.0	2331003.0		2332225.0	2332525.0	NC_000913.3	2255001.0				2255602.0	IS only present in query Strain.	1. DLIS	Complete IS hit.	b2162	pyrimidine-specific ribonucleoside hydrolase RihB	b2163	putative DNA-binding transcriptional regulator YeiL	b2162	pyrimidine-specific ribonucleoside hydrolase RihB	b2163	putative DNA-binding transcriptional regulator YeiL	4763752.0
1	1						64	2338335	290	300	56	IS30_IS30	2338335	2339555.0	NC_000913.3_art_ISs	2338034.0	2338334.0		2339556.0	2339856.0	NC_000913.3	2261111.0				2261712.0	IS only present in query Strain.	1. DLIS	Complete IS hit.	b2167	fructose-specific PTS multiphosphoryl transfer protein FruA	b2168	1-phosphofructokinase	b2167	fructose-specific PTS multiphosphoryl transfer protein FruA	b2168	1-phosphofructokinase	4763752.0
1	1						65	2415048	291	300	57	IS30_IS30	2415048	2416268.0	NC_000913.3_art_ISs	2414747.0	2415047.0		2416269.0	2416569.0	NC_000913.3	2336603.0				2337204.0	IS only present in query Strain.	1. DLIS	Complete IS hit.	b2230	DUF2138 domain-containing protein YfaA	-	Intergenic/Pseudo/Repeaed Region	b2230	DUF2138 domain-containing protein YfaA	b2231	DNA gyrase subunit A	4763752.0
1	1						66	2462961	292	300	58	IS30_IS30	2462961	2464181.0	NC_000913.3_art_ISs	2462660.0	2462960.0		2464182.0	2464482.0	NC_000913.3	2383295.0				2383896.0	IS only present in query Strain.	1. DLIS	Complete IS hit.	-	Intergenic/Pseudo/Repeaed Region	-	Intergenic/Pseudo/Repeaed Region	b2269	protease ElaD	b2269	protease ElaD	4763752.0
1	1						67	2528130	293	300	59	IS30_IS30	2528130	2529350.0	NC_000913.3_art_ISs	2527829.0	2528129.0		2529351.0	2529651.0	NC_000913.3	2447243.0				2447844.0	IS only present in query Strain.	1. DLIS	Complete IS hit.	b2329	chorismate synthase	-	Intergenic/Pseudo/Repeaed Region	b2329	chorismate synthase	b2330	50S ribosomal subunit protein L3 N(5)-glutamine methyltransferase	4763752.0
1	1						68	2951446	294	300	60	IS30_IS30	2951446	2952666.0	NC_000913.3_art_ISs	2951145.0	2951445.0		2952667.0	2952967.0	NC_000913.3	2869338.0				2869939.0	IS only present in query Strain.	1. DLIS	Complete IS hit.	b2743	L-isoaspartate protein carboxylmethyltransferase type II	-	Intergenic/Pseudo/Repeaed Region	b2743	L-isoaspartate protein carboxylmethyltransferase type II	b2744	broad specificity 5'(3')-nucleotidase and polyphosphatase	4763752.0
1	1						69	2954441	295	300	61	IS30_IS30	2954441	2955661.0	NC_000913.3_art_ISs	2954140.0	2954440.0		2955662.0	2955962.0	NC_000913.3	2871112.0				2871713.0	IS only present in query Strain.	1. DLIS	Complete IS hit.	b2745	tRNA pseudouridine(13) synthase	-	Intergenic/Pseudo/Repeaed Region	b2745	tRNA pseudouridine(13) synthase	b2746	2-C-methyl-D-erythritol 2;4-cyclodiphosphate synthase	4763752.0
1	1						70	2983613	296	300	62	IS30_IS30	2983613	2984833.0	NC_000913.3_art_ISs	2983312.0	2983612.0		2984834.0	2985134.0	NC_000913.3	2899063.0				2899664.0	IS only present in query Strain.	1. DLIS	Complete IS hit.	-	Intergenic/Pseudo/Repeaed Region	b2774	putative deoxygluconate dehydrogenase	b4463	putative FAD-containing dehydrogenase	b2774	putative deoxygluconate dehydrogenase	4763752.0
1	1						71	3057300	297	300	63	IS30_IS30	3057300	3058520.0	NC_000913.3_art_ISs	3056999.0	3057299.0		3058521.0	3058821.0	NC_000913.3	2971529.0				2972130.0	IS only present in query Strain.	1. DLIS	Complete IS hit.	-	Intergenic/Pseudo/Repeaed Region	-	Intergenic/Pseudo/Repeaed Region	-	Intergenic/Pseudo/Repeaed Region	b2834	putative NADP(H)-dependent aldo-keto reductase Tas	4763752.0
1	1						72	3104435	298	300	64	IS30_IS30	3104435	3105655.0	NC_000913.3_art_ISs	3104134.0	3104434.0		3105656.0	3105956.0	NC_000913.3	3017443.0				3018044.0	IS only present in query Strain.	1. DLIS	Complete IS hit.	-	Intergenic/Pseudo/Repeaed Region	-	Intergenic/Pseudo/Repeaed Region	b2878	putative oxidoreductase; Fe-S subunit	b2878	putative oxidoreductase; Fe-S subunit	4763752.0
1	1						73	3137784	299	300	65	IS30_IS30	3137784	3139004.0	NC_000913.3_art_ISs	3137483.0	3137783.0		3139005.0	3139305.0	NC_000913.3	3049571.0				3050172.0	IS only present in query Strain.	1. DLIS	Complete IS hit.	-	Intergenic/Pseudo/Repeaed Region	-	Intergenic/Pseudo/Repeaed Region	-	Intergenic/Pseudo/Repeaed Region	b2905	aminomethyltransferase	4763752.0
1	1						74	3161238	300	300	66	IS30_IS30	3161238	3162458.0	NC_000913.3_art_ISs	3160937.0	3161237.0		3162459.0	3162759.0	NC_000913.3	3071804.0				3072405.0	IS only present in query Strain.	1. DLIS	Complete IS hit.	-	Intergenic/Pseudo/Repeaed Region	-	Intergenic/Pseudo/Repeaed Region	b2926	phosphoglycerate kinase	b2926	phosphoglycerate kinase	4763752.0
1	1						75	3226249	301	300	67	IS30_IS30	3226249	3227469.0	NC_000913.3_art_ISs	3225948.0	3226248.0		3227470.0	3227770.0	NC_000913.3	3135594.0				3136195.0	IS only present in query Strain.	1. DLIS	Complete IS hit.	-	Intergenic/Pseudo/Repeaed Region	-	Intergenic/Pseudo/Repeaed Region	b2987	metal phosphate:H(+) symporter PitB	b2987	metal phosphate:H(+) symporter PitB	4763752.0
1	1						76	3361527	302	300	68	IS30_IS30	3361527	3362747.0	NC_000913.3_art_ISs	3361226.0	3361526.0		3362748.0	3363048.0	NC_000913.3	3269651.0				3270252.0	IS only present in query Strain.	1. DLIS	Complete IS hit.	-	Intergenic/Pseudo/Repeaed Region	-	Intergenic/Pseudo/Repeaed Region	-	Intergenic/Pseudo/Repeaed Region	-	Intergenic/Pseudo/Repeaed Region	4763752.0
1	1						77	3386688	303	300	69	IS30_IS30	3386688	3387908.0	NC_000913.3_art_ISs	3386387.0	3386687.0		3387909.0	3388209.0	NC_000913.3	3293591.0				3294192.0	IS only present in query Strain.	1. DLIS	Complete IS hit.	-	Intergenic/Pseudo/Repeaed Region	-	Intergenic/Pseudo/Repeaed Region	b3147	outer membrane lipoprotein - activator of MrcA activity	b3147	outer membrane lipoprotein - activator of MrcA activity	4763752.0
1	1						78	3441448	304	300	70	IS30_IS30	3441448	3442668.0	NC_000913.3_art_ISs	3441147.0	3441447.0		3442669.0	3442969.0	NC_000913.3	3347130.0				3347731.0	IS only present in query Strain.	1. DLIS	Complete IS hit.	-	Intergenic/Pseudo/Repeaed Region	-	Intergenic/Pseudo/Repeaed Region	b3205	RNase adaptor protein	b3205	RNase adaptor protein	4763752.0
1	1						79	3596382	305	300	71	IS30_IS30	3596382	3597602.0	NC_000913.3_art_ISs	3596081.0	3596381.0		3597603.0	3597903.0	NC_000913.3	3500843.0				3501444.0	IS only present in query Strain.	1. DLIS	Complete IS hit.	-	Intergenic/Pseudo/Repeaed Region	b3371	fructoselysine 6-phosphate deglycase	b3370	fructoselysine/psicoselysine transporter	b3371	fructoselysine 6-phosphate deglycase	4763752.0
1	1						80	3615538	306	300	72	IS30_IS30	3615538	3616758.0	NC_000913.3_art_ISs	3615237.0	3615537.0		3616759.0	3617059.0	NC_000913.3	3518778.0				3519379.0	IS only present in query Strain.	1. DLIS	Complete IS hit.	b3390	shikimate kinase 1	-	Intergenic/Pseudo/Repeaed Region	b3390	shikimate kinase 1	-	Intergenic/Pseudo/Repeaed Region	4763752.0
1	1						81	3617769	307	300	73	IS30_IS30	3617769	3618989.0	NC_000913.3_art_ISs	3617468.0	3617768.0		3618990.0	3619290.0	NC_000913.3	3519788.0				3520389.0	IS only present in query Strain.	1. DLIS	Complete IS hit.	-	Intergenic/Pseudo/Repeaed Region	-	Intergenic/Pseudo/Repeaed Region	b3391	DNA utilization protein HofQ	b3391	DNA utilization protein HofQ	4763752.0
1	1						82	3654946	308	300	74	IS30_IS30	3654946	3656166.0	NC_000913.3_art_ISs	3654645.0	3654945.0		3656167.0	3656467.0	NC_000913.3	3555744.0				3556345.0	IS only present in query Strain.	1. DLIS	Complete IS hit.	b3418	DNA-binding transcriptional activator MalT	-	Intergenic/Pseudo/Repeaed Region	b3418	DNA-binding transcriptional activator MalT	b4475	RNA 3'-terminal phosphate cyclase	4763752.0
1	1						83	3658126	309	300	75	IS30_IS30	3658126	3659346.0	NC_000913.3_art_ISs	3657825.0	3658125.0		3659347.0	3659647.0	NC_000913.3	3557703.0				3558304.0	IS only present in query Strain.	1. DLIS	Complete IS hit.	-	Intergenic/Pseudo/Repeaed Region	b3422	DNA-binding transcriptional activator RtcR	b3421	RNA-splicing ligase	b3422	DNA-binding transcriptional activator RtcR	4763752.0
1	1						84	3727323	310	300	76	IS30_IS30	3727323	3728543.0	NC_000913.3_art_ISs	3727022.0	3727322.0		3728544.0	3728844.0	NC_000913.3	3625679.0				3626280.0	IS only present in query Strain.	1. DLIS	Complete IS hit.	-	Intergenic/Pseudo/Repeaed Region	-	Intergenic/Pseudo/Repeaed Region	b3485	ABC transporter family protein YhhJ	b3485	ABC transporter family protein YhhJ	4763752.0
1	1						85	3766127	311	300	77	IS30_IS30	3766127	3767347.0	NC_000913.3_art_ISs	3765826.0	3766126.0		3767348.0	3767648.0	NC_000913.3	3663262.0				3663863.0	IS only present in query Strain.	1. DLIS	Complete IS hit.	b3514	multidrug efflux pump RND permease MdtF	-	Intergenic/Pseudo/Repeaed Region	b3514	multidrug efflux pump RND permease MdtF	-	Intergenic/Pseudo/Repeaed Region	4763752.0
1	1						86	3798695	312	300	78	IS30_IS30	3798695	3799915.0	NC_000913.3_art_ISs	3798394.0	3798694.0		3799916.0	3800216.0	NC_000913.3	3694609.0				3695210.0	IS only present in query Strain.	1. DLIS	Complete IS hit.	-	Intergenic/Pseudo/Repeaed Region	-	Intergenic/Pseudo/Repeaed Region	b3533	cellulose synthase catalytic subunit	b3533	cellulose synthase catalytic subunit	4763752.0
1	1						87	3900620	313	300	79	IS30_IS30	3900620	3901840.0	NC_000913.3_art_ISs	3900319.0	3900619.0		3901841.0	3902141.0	NC_000913.3	3795313.0				3795914.0	IS only present in query Strain.	1. DLIS	Complete IS hit.	-	Intergenic/Pseudo/Repeaed Region	-	Intergenic/Pseudo/Repeaed Region	b3620	ADP-heptose--LPS heptosyltransferase 2	b3620	ADP-heptose--LPS heptosyltransferase 2	4763752.0
1	1						88	4006509	314	300	80	IS30_IS30	4006509	4007729.0	NC_000913.3_art_ISs	4006208.0	4006508.0		4007730.0	4008030.0	NC_000913.3	3899981.0				3900582.0	IS only present in query Strain.	1. DLIS	Complete IS hit.	-	Intergenic/Pseudo/Repeaed Region	-	Intergenic/Pseudo/Repeaed Region	b3719	putative hydrolase YieL	-	Intergenic/Pseudo/Repeaed Region	4763752.0
1	1						89	4013286	315	300	81	IS30_IS30	4013286	4014506.0	NC_000913.3_art_ISs	4012985.0	4013285.0		4014507.0	4014807.0	NC_000913.3	3905537.0				3906138.0	IS only present in query Strain.	1. DLIS	Complete IS hit.	b3722	beta-glucoside specific PTS enzyme II/BglG kinase/BglG phosphatase	-	Intergenic/Pseudo/Repeaed Region	b3722	beta-glucoside specific PTS enzyme II/BglG kinase/BglG phosphatase	b3723	transcriptional antiterminator BglG	4763752.0
1	1						90	4027534	316	300	82	IS30_IS30	4027534	4028754.0	NC_000913.3_art_ISs	4027233.0	4027533.0		4028755.0	4029055.0	NC_000913.3	3918564.0				3919165.0	IS only present in query Strain.	1. DLIS	Complete IS hit.	-	Intergenic/Pseudo/Repeaed Region	-	Intergenic/Pseudo/Repeaed Region	b3734	ATP synthase F1 complex subunit alpha	b3734	ATP synthase F1 complex subunit alpha	4763752.0
1	1						91	4248889	317	300	83	IS30_IS30	4248889	4250109.0	NC_000913.3_art_ISs	4248588.0	4248888.0		4250110.0	4250410.0	NC_000913.3	4138698.0				4139299.0	IS only present in query Strain.	1. DLIS	Complete IS hit.	-	Intergenic/Pseudo/Repeaed Region	b3946	fructose-6-phosphate aldolase 2	b3945	L-1;2-propanediol dehydrogenase/glycerol dehydrogenase	b3946	fructose-6-phosphate aldolase 2	4763752.0
1	1						92	4260696	318	300	84	IS30_IS30	4260696	4261916.0	NC_000913.3_art_ISs	4260395.0	4260695.0		4261917.0	4262217.0	NC_000913.3	4149284.0				4149885.0	IS only present in query Strain.	1. DLIS	Complete IS hit.	-	Intergenic/Pseudo/Repeaed Region	-	Intergenic/Pseudo/Repeaed Region	b3955	phosphoethanolamine transferase EptC	b3955	phosphoethanolamine transferase EptC	4763752.0
1	1						93	4264502	319	300	85	IS30_IS30	4264502	4265722.0	NC_000913.3_art_ISs	4264201.0	4264501.0		4265723.0	4266023.0	NC_000913.3	4151869.0				4152470.0	IS only present in query Strain.	1. DLIS	Complete IS hit.	-	Intergenic/Pseudo/Repeaed Region	-	Intergenic/Pseudo/Repeaed Region	b3956	phosphoenolpyruvate carboxylase	b3956	phosphoenolpyruvate carboxylase	4763752.0
1	1						94	4311821	320	300	86	IS30_IS30	4311821	4313041.0	NC_000913.3_art_ISs	4311520.0	4311820.0		4313042.0	4313342.0	NC_000913.3	4197967.0				4198568.0	IS only present in query Strain.	1. DLIS	Complete IS hit.	-	Intergenic/Pseudo/Repeaed Region	-	Intergenic/Pseudo/Repeaed Region	b3997	uroporphyrinogen decarboxylase	b3997	uroporphyrinogen decarboxylase	4763752.0
1	1						95	4389275	321	300	87	IS30_IS30	4389275	4390495.0	NC_000913.3_art_ISs	4388974.0	4389274.0		4390496.0	4390796.0	NC_000913.3	4274200.0				4274801.0	IS only present in query Strain.	1. DLIS	Complete IS hit.	-	Intergenic/Pseudo/Repeaed Region	b4060	uncharacterized protein YjcB	b4059	ssDNA-binding protein	b4060	uncharacterized protein YjcB	4763752.0
1	1						96	4434397	322	300	88	IS30_IS30	4434397	4435617.0	NC_000913.3_art_ISs	4434096.0	4434396.0		4435618.0	4435918.0	NC_000913.3	4318101.0				4318702.0	IS only present in query Strain.	1. DLIS	Complete IS hit.	-	Intergenic/Pseudo/Repeaed Region	-	Intergenic/Pseudo/Repeaed Region	b4097	carbon-phosphorus lyase subunit PhnK	b4097	carbon-phosphorus lyase subunit PhnK	4763752.0
	1			1			97	4461112	323	300	102	IS30_IS30	4461112	4461482.0	NC_000913.3_art_ISs	4460811.0	4461111.0		4461483.0	4461783.0							IS only present in query Strain.	2. Verify manually, possible false positive caused by consecutive ISs.	Partial IS hit.	-	Intergenic/Pseudo/Repeaed Region	-	Intergenic/Pseudo/Repeaed Region	-	-	-	-	4763752.0
	1			1			98	4461481	324	300	103	IS30_IS30	4461481	4462701.0	NC_000913.3_art_ISs	4461180.0	4461480.0		4462702.0	4463002.0	NC_000913.3	271092.0				271693.0	IS only present in query Strain.	2. Verify manually, possible false positive caused by consecutive ISs.	Complete IS hit.	-	Intergenic/Pseudo/Repeaed Region	-	Intergenic/Pseudo/Repeaed Region	b0256	IS30 transposase	b0256	IS30 transposase	4763752.0
1	1						99	4509587	325	300	89	IS30_IS30	4509587	4510807.0	NC_000913.3_art_ISs	4509286.0	4509586.0		4510808.0	4511108.0	NC_000913.3	4389628.0				4390229.0	IS only present in query Strain.	1. DLIS	Complete IS hit.	-	Intergenic/Pseudo/Repeaed Region	-	Intergenic/Pseudo/Repeaed Region	b4160	phosphatidylserine decarboxylase proenzyme	b4160	phosphatidylserine decarboxylase proenzyme	4763752.0
1	1						100	4524761	326	300	90	IS30_IS30	4524761	4525981.0	NC_000913.3_art_ISs	4524460.0	4524760.0		4525982.0	4526282.0	NC_000913.3	4403581.0				4404182.0	IS only present in query Strain.	1. DLIS	Complete IS hit.	-	Intergenic/Pseudo/Repeaed Region	-	Intergenic/Pseudo/Repeaed Region	b4175	regulator of FtsH protease	b4175	regulator of FtsH protease	4763752.0
			1						327	300	92	IS30_IS30	249701	250822.0	NC_000913.3_art_ISs	249400.0	249700.0		250823.0	251123.0	NC_000913.3	1469294.0	1469596.0				IS only present in query Strain.	2. Verify manually, possible false positive caused by consecutive ISs.	Partial IS hit.	-	Intergenic/Pseudo/Repeaed Region	-	Intergenic/Pseudo/Repeaed Region	b4492	putative outer membrane protein; N-terminal fragment	-	-	4763752.0
			1						328	300	93	ISEc1_ISAs1	736682	737971.0	NC_000913.3_art_ISs	763243.0				763867.0	NC_000913.3	736381.0	736681.0		737972.0	738272.0	IS only present in ref Strain.	2. Verify manually, possible false positive caused by consecutive ISs.	Complete IS hit.	-	Intergenic/Pseudo/Repeaed Region	b0705	putative transposase YbfL	b0681	chitobiose outer membrane channel	b0684	flavodoxin 1	4641652.0
			1						329	300	94	ISEc1_ISAs1	763544	764833.0	NC_000913.3_art_ISs	763243.0	763543.0		764834.0	765134.0	NC_000913.3	736381.0				737005.0	IS only present in query Strain.	2. Verify manually, possible false positive caused by consecutive ISs.	Complete IS hit.	b4514	inactive transposase YbfQ	b0706	H repeat-associated putative transposase YbfD	-	Intergenic/Pseudo/Repeaed Region	b0705	putative transposase YbfL	4763752.0
			1						330	300	100	IS30_IS30	2316971	2317566.0	NC_000913.3_art_ISs	2316670.0	2316970.0		2317567.0	2317867.0							IS only present in query Strain.	2. Verify manually, possible false positive caused by consecutive ISs.	Partial IS hit.	-	Intergenic/Pseudo/Repeaed Region	-	Intergenic/Pseudo/Repeaed Region	-	-	-	-	4763752.0
			1						331	300	101	IS30_IS30	2317567	2317964.0	NC_000913.3_art_ISs	2317266.0	2317566.0		2317965.0	2318265.0							IS only present in query Strain.	2. Verify manually, possible false positive caused by consecutive ISs.	Partial IS hit.	-	Intergenic/Pseudo/Repeaed Region	-	Intergenic/Pseudo/Repeaed Region	-	-	-	-	4763752.0
			1						332	300	104	IS30_IS30	4462702	4463553.0	NC_000913.3_art_ISs	4462401.0	4462701.0		4463554.0	4463854.0	NC_000913.3	1469295.0	1469596.0				IS only present in query Strain.	2. Verify manually, possible false positive caused by consecutive ISs.	Partial IS hit.	-	Intergenic/Pseudo/Repeaed Region	-	Intergenic/Pseudo/Repeaed Region	b4492	putative outer membrane protein; N-terminal fragment	-	-	4763752.0
			1						333	300	105	ISEc52_IS3_IS3	271762	272190.0	NC_000913.3_art_ISs	1317793.0	1318097.0				NC_000913.3	271461.0	271761.0		272191.0	272491.0	IS only present in ref Strain.	5. Discarded for analysis. There were multiple blastn hits, and left and right pairs could not be determined.	Partial IS hit.	-	Intergenic/Pseudo/Repeaed Region	-	-	b0243	glutamate-5-semialdehyde dehydrogenase	b0243	glutamate-5-semialdehyde dehydrogenase	4641652.0
			1						334	300	106	IS2_IS2_IS3	399833	400905.0	NC_000913.3_art_ISs	399532.0	399832.0		400906.0	401206.0	NC_000913.3	1469289.0	1469596.0				IS only present in query Strain.	5. Discarded for analysis. There were multiple blastn hits, and left and right pairs could not be determined.	Partial IS hit.	-	Intergenic/Pseudo/Repeaed Region	b0363	putative glucosyltransferase	b4492	putative outer membrane protein; N-terminal fragment	-	-	4763752.0
91	99	0	8	9	1	*			335	300
1	1						1	446	336	400	0	IS30_IS30	446	1666.0	NC_000913.3_art_ISs	45.0	445.0		1667.0	2067.0	NC_000913.3	45.0				846.0	IS only present in query Strain.	1. DLIS	Complete IS hit.	-	Intergenic/Pseudo/Repeaed Region	-	Intergenic/Pseudo/Repeaed Region	-	Intergenic/Pseudo/Repeaed Region	b0002	fused aspartate kinase/homoserine dehydrogenase 1	4763752.0
1	1						2	3160	337	400	1	IS30_IS30	3160	4380.0	NC_000913.3_art_ISs	2759.0	3159.0		4381.0	4781.0	NC_000913.3	1538.0				2339.0	IS only present in query Strain.	1. DLIS	Complete IS hit.	-	Intergenic/Pseudo/Repeaed Region	-	Intergenic/Pseudo/Repeaed Region	b0002	fused aspartate kinase/homoserine dehydrogenase 1	b0002	fused aspartate kinase/homoserine dehydrogenase 1	4763752.0
1	1						3	123711	338	400	2	IS30_IS30	123711	124931.0	NC_000913.3_art_ISs	123310.0	123710.0		124932.0	125332.0	NC_000913.3	120868.0				121669.0	IS only present in query Strain.	1. DLIS	Complete IS hit.	-	Intergenic/Pseudo/Repeaed Region	-	Intergenic/Pseudo/Repeaed Region	b0112	aromatic amino acid:H(+) symporter AroP	-	Intergenic/Pseudo/Repeaed Region	4763752.0
1	1						4	142989	339	400	3	IS30_IS30	142989	144209.0	NC_000913.3_art_ISs	142588.0	142988.0		144210.0	144610.0	NC_000913.3	138925.0				139726.0	IS only present in query Strain.	1. DLIS	Complete IS hit.	-	Intergenic/Pseudo/Repeaed Region	-	Intergenic/Pseudo/Repeaed Region	b0124	quinoprotein glucose dehydrogenase	b0124	quinoprotein glucose dehydrogenase	4763752.0
1	1						5	163498	340	400	4	IS30_IS30	163498	164718.0	NC_000913.3_art_ISs	163097.0	163497.0		164719.0	165119.0	NC_000913.3	158213.0				159014.0	IS only present in query Strain.	1. DLIS	Complete IS hit.	-	Intergenic/Pseudo/Repeaed Region	-	Intergenic/Pseudo/Repeaed Region	b0143	poly(A) polymerase I	b0143	poly(A) polymerase I	4763752.0
1	1						6	240046	341	400	5	IS30_IS30	240046	241266.0	NC_000913.3_art_ISs	239645.0	240045.0		241267.0	241667.0	NC_000913.3	233540.0				234341.0	IS only present in query Strain.	1. DLIS	Complete IS hit.	-	Intergenic/Pseudo/Repeaed Region	b0212	hydroxyacylglutathione hydrolase GloB	b0211	membrane-bound lytic murein transglycosylase D	b0212	hydroxyacylglutathione hydrolase GloB	4763752.0
				1	1		7	248381	342	400
	1			1			8	248480	343	400	91	IS30_IS30	248480	249700.0	NC_000913.3_art_ISs	248079.0	248479.0		249701.0	250101.0							IS only present in query Strain.	2. Verify manually, possible false positive caused by consecutive ISs.		b0220	periplasmic chaperone; inhibitor of vertebrate C-type lysozyme	-	Intergenic/Pseudo/Repeaed Region	-	-	-	-	4763752.0
1	1						9	310515	344	400	6	IS30_IS30	310515	311735.0	NC_000913.3_art_ISs	310114.0	310514.0		311736.0	312136.0	NC_000913.3	300346.0				301147.0	IS only present in query Strain.	1. DLIS	Complete IS hit.	-	Intergenic/Pseudo/Repeaed Region	b0285	aldehyde dehydrogenase; FAD-binding subunit	b0284	aldehyde dehydrogenase: molybdenum cofactor-binding subunit	b0285	aldehyde dehydrogenase; FAD-binding subunit	4763752.0
1	1						10	315801	345	400	7	IS30_IS30	315801	317021.0	NC_000913.3_art_ISs	315400.0	315800.0		317022.0	317422.0	NC_000913.3	304411.0				305212.0	IS only present in query Strain.	1. DLIS	Complete IS hit.	-	Intergenic/Pseudo/Repeaed Region	b0290	fimbrial adhesin EcpD	-	Intergenic/Pseudo/Repeaed Region	b0290	fimbrial adhesin EcpD	4763752.0
1	1						11	333734	346	400	8	IS30_IS30	333734	334954.0	NC_000913.3_art_ISs	333333.0	333733.0		334955.0	335355.0	NC_000913.3	321123.0				321924.0	IS only present in query Strain.	1. DLIS	Complete IS hit.	-	Intergenic/Pseudo/Repeaed Region	b0306	putative lactate utilization oxidoreductase YkgE	-	Intergenic/Pseudo/Repeaed Region	b0306	putative lactate utilization oxidoreductase YkgE	4763752.0
1	1						12	356194	347	400	9	IS30_IS30	356194	357414.0	NC_000913.3_art_ISs	355793.0	356193.0		357415.0	357815.0	NC_000913.3	342362.0				343163.0	IS only present in query Strain.	1. DLIS	Complete IS hit.	b0324	putative deaminase with metallo-dependent hydrolase domain	b0325	aldehyde reductase; NADPH-dependent	b0324	putative deaminase with metallo-dependent hydrolase domain	b0325	aldehyde reductase; NADPH-dependent	4763752.0
1	1						13	361260	348	400	10	IS30_IS30	361260	362480.0	NC_000913.3_art_ISs	360859.0	361259.0		362481.0	362881.0	NC_000913.3	346207.0				347008.0	IS only present in query Strain.	1. DLIS	Complete IS hit.	b0328	putative amino acid exporter	b0330	DNA-binding transcriptional dual regulator PrpR	b0328	putative amino acid exporter	b0330	DNA-binding transcriptional dual regulator PrpR	4763752.0
1	1						14	395877	349	400	11	IS30_IS30	395877	397097.0	NC_000913.3_art_ISs	395476.0	395876.0		397098.0	397498.0	NC_000913.3	379603.0				380404.0	IS only present in query Strain.	1. DLIS	Complete IS hit.	-	Intergenic/Pseudo/Repeaed Region	b0358	outer membrane protein YaiO	-	Intergenic/Pseudo/Repeaed Region	b0358	outer membrane protein YaiO	4763752.0
1	1						15	398612	350	400	12	IS30_IS30	398612	399832.0	NC_000913.3_art_ISs	398211.0	398611.0		399833.0	400233.0	NC_000913.3	381117.0				381918.0	IS only present in query Strain.	1. DLIS	Complete IS hit.	-	Intergenic/Pseudo/Repeaed Region	b0361	IS2 element protein	b4579	putative acyltransferase; N-terminal fragment	b0361	IS2 element protein	4763752.0
1	1						16	458588	351	400	13	IS30_IS30	458588	459808.0	NC_000913.3_art_ISs	458187.0	458587.0		459809.0	460209.0	NC_000913.3	439872.0				440673.0	IS only present in query Strain.	1. DLIS	Complete IS hit.	b0420	1-deoxy-D-xylulose-5-phosphate synthase	-	Intergenic/Pseudo/Repeaed Region	b0420	1-deoxy-D-xylulose-5-phosphate synthase	b0421	geranyl diphosphate/farnesyl diphosphate synthase	4763752.0
1	1						17	515332	352	400	14	IS30_IS30	515332	516552.0	NC_000913.3_art_ISs	514931.0	515331.0		516553.0	516953.0	NC_000913.3	495395.0				496196.0	IS only present in query Strain.	1. DLIS	Complete IS hit.	-	Intergenic/Pseudo/Repeaed Region	-	Intergenic/Pseudo/Repeaed Region	b0473	chaperone protein HtpG	b0473	chaperone protein HtpG	4763752.0
1	1						18	518331	353	400	15	IS30_IS30	518331	519551.0	NC_000913.3_art_ISs	517930.0	518330.0		519552.0	519952.0	NC_000913.3	497173.0				497974.0	IS only present in query Strain.	1. DLIS	Complete IS hit.	-	Intergenic/Pseudo/Repeaed Region	-	Intergenic/Pseudo/Repeaed Region	-	Intergenic/Pseudo/Repeaed Region	-	Intergenic/Pseudo/Repeaed Region	4763752.0
1	1						19	564278	354	400	16	IS30_IS30	564278	565498.0	NC_000913.3_art_ISs	563877.0	564277.0		565499.0	565899.0	NC_000913.3	541899.0				542700.0	IS only present in query Strain.	1. DLIS	Complete IS hit.	-	Intergenic/Pseudo/Repeaed Region	-	Intergenic/Pseudo/Repeaed Region	b0514	glycerate 2-kinase 2	b0514	glycerate 2-kinase 2	4763752.0
1	1						20	638410	355	400	17	IS30_IS30	638410	639630.0	NC_000913.3_art_ISs	638009.0	638409.0		639631.0	640031.0	NC_000913.3	614810.0				615611.0	IS only present in query Strain.	1. DLIS	Complete IS hit.	-	Intergenic/Pseudo/Repeaed Region	-	Intergenic/Pseudo/Repeaed Region	b0586	apo-serine activating enzyme	b0586	apo-serine activating enzyme	4763752.0
1	1						21	643571	356	400	18	IS30_IS30	643571	644791.0	NC_000913.3_art_ISs	643170.0	643570.0		644792.0	645192.0	NC_000913.3	618750.0				619551.0	IS only present in query Strain.	1. DLIS	Complete IS hit.	-	Intergenic/Pseudo/Repeaed Region	b0588	ferric enterobactin ABC transporter ATP binding subunit	b0587	polysaccharide co-polymerase family protein FepE	b0588	ferric enterobactin ABC transporter ATP binding subunit	4763752.0
1	1						22	709250	357	400	19	IS30_IS30	709250	710470.0	NC_000913.3_art_ISs	708849.0	709249.0		710471.0	710871.0	NC_000913.3	683208.0				684009.0	IS only present in query Strain.	1. DLIS	Complete IS hit.	b0650	chaperone protein HscC	-	Intergenic/Pseudo/Repeaed Region	b0650	chaperone protein HscC	b0651	pyrimidine-specific ribonucleoside hydrolase RihA	4763752.0
1	1						23	780879	358	400	20	IS30_IS30	780879	782099.0	NC_000913.3_art_ISs	780478.0	780878.0		782100.0	782500.0	NC_000913.3	753616.0				754417.0	IS only present in query Strain.	1. DLIS	Complete IS hit.	-	Intergenic/Pseudo/Repeaed Region	-	Intergenic/Pseudo/Repeaed Region	b0720	citrate synthase	b0720	citrate synthase	4763752.0
1	1						24	794533	359	400	21	IS30_IS30	794533	795753.0	NC_000913.3_art_ISs	794132.0	794532.0		795754.0	796154.0	NC_000913.3	766049.0				766850.0	IS only present in query Strain.	1. DLIS	Complete IS hit.	-	Intergenic/Pseudo/Repeaed Region	-	Intergenic/Pseudo/Repeaed Region	b0731	2-O-alpha-mannosyl-D-glycerate specific PTS enzyme II	b0731	2-O-alpha-mannosyl-D-glycerate specific PTS enzyme II	4763752.0
1	1						25	818746	360	400	22	IS30_IS30	818746	819966.0	NC_000913.3_art_ISs	818345.0	818745.0		819967.0	820367.0	NC_000913.3	789041.0				789842.0	IS only present in query Strain.	1. DLIS	Complete IS hit.	-	Intergenic/Pseudo/Repeaed Region	-	Intergenic/Pseudo/Repeaed Region	b0757	galactokinase	b0757	galactokinase	4763752.0
1	1						26	827842	361	400	23	IS30_IS30	827842	829062.0	NC_000913.3_art_ISs	827441.0	827841.0		829063.0	829463.0	NC_000913.3	796916.0				797717.0	IS only present in query Strain.	1. DLIS	Complete IS hit.	-	Intergenic/Pseudo/Repeaed Region	b0766	pyridoxal phosphate/fructose-1;6-bisphosphate phosphatase	b0765	molybdate ABC transporter ATP binding subunit	b0766	pyridoxal phosphate/fructose-1;6-bisphosphate phosphatase	4763752.0
1	1						27	840349	362	400	24	IS30_IS30	840349	841569.0	NC_000913.3_art_ISs	839948.0	840348.0		841570.0	841970.0	NC_000913.3	808202.0				809003.0	IS only present in query Strain.	1. DLIS	Complete IS hit.	-	Intergenic/Pseudo/Repeaed Region	-	Intergenic/Pseudo/Repeaed Region	b0774	adenosylmethionine-8-amino-7-oxononanoate aminotransferase	b0774	adenosylmethionine-8-amino-7-oxononanoate aminotransferase	4763752.0
1	1						28	866245	363	400	25	IS30_IS30	866245	867465.0	NC_000913.3_art_ISs	865844.0	866244.0		867466.0	867866.0	NC_000913.3	832877.0				833678.0	IS only present in query Strain.	1. DLIS	Complete IS hit.	b0798	N-glycosidase YbiA	-	Intergenic/Pseudo/Repeaed Region	b0798	N-glycosidase YbiA	b0799	ATP-dependent DNA helicase DinG	4763752.0
1	1						29	885800	364	400	26	IS30_IS30	885800	887020.0	NC_000913.3_art_ISs	885399.0	885799.0		887021.0	887421.0	NC_000913.3	851211.0				852012.0	IS only present in query Strain.	1. DLIS	Complete IS hit.	-	Intergenic/Pseudo/Repeaed Region	-	Intergenic/Pseudo/Repeaed Region	b0815	phosphoethanolamine transferase	b0815	phosphoethanolamine transferase	4763752.0
1	1						30	1054897	365	400	27	IS30_IS30	1054897	1056117.0	NC_000913.3_art_ISs	1054496.0	1054896.0		1056118.0	1056518.0	NC_000913.3	1019087.0				1019888.0	IS only present in query Strain.	1. DLIS	Complete IS hit.	-	Intergenic/Pseudo/Repeaed Region	-	Intergenic/Pseudo/Repeaed Region	b0957	outer membrane porin A	b0957	outer membrane porin A	4763752.0
1	1						31	1102873	366	400	28	IS30_IS30	1102873	1104093.0	NC_000913.3_art_ISs	1102472.0	1102872.0		1104094.0	1104494.0	NC_000913.3	1065842.0				1066643.0	IS only present in query Strain.	1. DLIS	Complete IS hit.	-	Intergenic/Pseudo/Repeaed Region	-	Intergenic/Pseudo/Repeaed Region	b1002	glucose-1-phosphatase	b1002	glucose-1-phosphatase	4763752.0
1	1						32	1118119	367	400	29	IS30_IS30	1118119	1119339.0	NC_000913.3_art_ISs	1117718.0	1118118.0		1119340.0	1119740.0	NC_000913.3	1079867.0				1080668.0	IS only present in query Strain.	1. DLIS	Complete IS hit.	-	Intergenic/Pseudo/Repeaed Region	-	Intergenic/Pseudo/Repeaed Region	b1015	proline:Na(+) symporter	b1015	proline:Na(+) symporter	4763752.0
1	1						33	1150109	368	400	30	IS30_IS30	1150109	1151329.0	NC_000913.3_art_ISs	1149708.0	1150108.0		1151330.0	1151730.0	NC_000913.3	1110636.0				1111437.0	IS only present in query Strain.	1. DLIS	Complete IS hit.	b1048	osmoregulated periplasmic glucans (OPGs) biosynthesis protein G	-	Intergenic/Pseudo/Repeaed Region	b1048	osmoregulated periplasmic glucans (OPGs) biosynthesis protein G	b1049	osmoregulated periplasmic glucans (OPGs) biosynthesis protein H	4763752.0
1	1						34	1165669	369	400	31	IS30_IS30	1165669	1166889.0	NC_000913.3_art_ISs	1165268.0	1165668.0		1166890.0	1167290.0	NC_000913.3	1124975.0				1125776.0	IS only present in query Strain.	1. DLIS	Complete IS hit.	b1065	multidrug efflux pump MdtH	b1066	ribosomal-protein-S5-alanine N-acetyltransferase	b1065	multidrug efflux pump MdtH	b1066	ribosomal-protein-S5-alanine N-acetyltransferase	4763752.0
1	1						35	1252656	370	400	32	IS30_IS30	1252656	1253876.0	NC_000913.3_art_ISs	1252255.0	1252655.0		1253877.0	1254277.0	NC_000913.3	1210741.0				1211542.0	IS only present in query Strain.	1. DLIS	Complete IS hit.	-	Intergenic/Pseudo/Repeaed Region	b4519	protein IcdC	b1159	e14 prophage; 5-methylcytosine-specific restriction enzyme McrA	b4519	protein IcdC	4763752.0
1	1						36	1314729	371	400	33	IS30_IS30	1314729	1315949.0	NC_000913.3_art_ISs	1314328.0	1314728.0		1315950.0	1316350.0	NC_000913.3	1271593.0				1272394.0	IS only present in query Strain.	1. DLIS	Complete IS hit.	b1216	Na(+)/K(+):H(+) antiporter ChaA	-	Intergenic/Pseudo/Repeaed Region	b1216	Na(+)/K(+):H(+) antiporter ChaA	-	Intergenic/Pseudo/Repeaed Region	4763752.0
1	1						37	1316873	372	400	34	IS30_IS30	1316873	1318093.0	NC_000913.3_art_ISs	1316472.0	1316872.0		1318094.0	1318494.0	NC_000913.3	1272516.0				1273317.0	IS only present in query Strain.	1. DLIS	Complete IS hit.	-	Intergenic/Pseudo/Repeaed Region	b1219	DsrE/F sulfur relay family protein YchN	b1218	glutathione-specific gamma-glutamylcyclotransferase	b1219	DsrE/F sulfur relay family protein YchN	4763752.0
1	1						38	1332696	373	400	35	IS30_IS30	1332696	1333916.0	NC_000913.3_art_ISs	1332295.0	1332695.0		1333917.0	1334317.0	NC_000913.3	1287118.0				1287919.0	IS only present in query Strain.	1. DLIS	Complete IS hit.	b1229	protamine-like protein	b1232	formyltetrahydrofolate deformylase	b1229	protamine-like protein	b1232	formyltetrahydrofolate deformylase	4763752.0
1	1						39	1477755	374	400	36	IS30_IS30	1477755	1478975.0	NC_000913.3_art_ISs	1477354.0	1477754.0		1478976.0	1479376.0	NC_000913.3	1430956.0				1431757.0	IS only present in query Strain.	1. DLIS	Complete IS hit.	-	Intergenic/Pseudo/Repeaed Region	-	Intergenic/Pseudo/Repeaed Region	b1372	Rac prophage; putative membrane protein	b1372	Rac prophage; putative membrane protein	4763752.0
1	1						40	1530090	375	400	37	IS30_IS30	1530090	1531310.0	NC_000913.3_art_ISs	1529689.0	1530089.0		1531311.0	1531711.0	NC_000913.3	1482070.0				1482871.0	IS only present in query Strain.	1. DLIS	Complete IS hit.	b1411	putative phosphatase	-	Intergenic/Pseudo/Repeaed Region	b1411	putative phosphatase	-	Intergenic/Pseudo/Repeaed Region	4763752.0
1	1						41	1599338	376	400	38	IS30_IS30	1599338	1600558.0	NC_000913.3_art_ISs	1598937.0	1599337.0		1600559.0	1600959.0	NC_000913.3	1550097.0				1550898.0	IS only present in query Strain.	1. DLIS	Complete IS hit.	b1474	formate dehydrogenase N subunit alpha	-	Intergenic/Pseudo/Repeaed Region	b1474	formate dehydrogenase N subunit alpha	b1475	formate dehydrogenase N subunit beta	4763752.0
1	1						42	1601001	377	400	39	IS30_IS30	1601001	1602221.0	NC_000913.3_art_ISs	1600600.0	1601000.0		1602222.0	1602622.0	NC_000913.3	1550539.0				1551340.0	IS only present in query Strain.	1. DLIS	Complete IS hit.	-	Intergenic/Pseudo/Repeaed Region	b1476	formate dehydrogenase N subunit gamma	b1475	formate dehydrogenase N subunit beta	b1475	formate dehydrogenase N subunit beta	4763752.0
1	1						43	1614176	378	400	40	IS30_IS30	1614176	1615396.0	NC_000913.3_art_ISs	1613775.0	1614175.0		1615397.0	1615797.0	NC_000913.3	1562493.0				1563294.0	IS only present in query Strain.	1. DLIS	Complete IS hit.	-	Intergenic/Pseudo/Repeaed Region	-	Intergenic/Pseudo/Repeaed Region	-	Intergenic/Pseudo/Repeaed Region	-	Intergenic/Pseudo/Repeaed Region	4763752.0
1	1						44	1700984	379	400	41	IS30_IS30	1700984	1702204.0	NC_000913.3_art_ISs	1700583.0	1700983.0		1702205.0	1702605.0	NC_000913.3	1648080.0				1648881.0	IS only present in query Strain.	1. DLIS	Complete IS hit.	b1570	DNA-binding transcriptional dual regulator DicA	b1573	Qin prophage; uncharacterized protein YdfC	b1570	DNA-binding transcriptional dual regulator DicA	b1573	Qin prophage; uncharacterized protein YdfC	4763752.0
1	1						45	1724977	380	400	42	IS30_IS30	1724977	1726197.0	NC_000913.3_art_ISs	1724576.0	1724976.0		1726198.0	1726598.0	NC_000913.3	1670852.0				1671653.0	IS only present in query Strain.	1. DLIS	Complete IS hit.	b1596	putative transporter YnfM	b1597	acid shock protein	b1596	putative transporter YnfM	b1597	acid shock protein	4763752.0
1	1						46	1739082	381	400	43	IS30_IS30	1739082	1740302.0	NC_000913.3_art_ISs	1738681.0	1739081.0		1740303.0	1740703.0	NC_000913.3	1683736.0				1684537.0	IS only present in query Strain.	1. DLIS	Complete IS hit.	-	Intergenic/Pseudo/Repeaed Region	b1610	DNA replication terminus site-binding protein	b1609	sensory histidine kinase RstB	b1610	DNA replication terminus site-binding protein	4763752.0
1	1						47	1744580	382	400	44	IS30_IS30	1744580	1745800.0	NC_000913.3_art_ISs	1744179.0	1744579.0		1745801.0	1746201.0	NC_000913.3	1688013.0				1688814.0	IS only present in query Strain.	1. DLIS	Complete IS hit.	b1612	fumarase A	b1613	mannose-6-phosphate isomerase	b1612	fumarase A	b1613	mannose-6-phosphate isomerase	4763752.0
1	1						48	1763370	383	400	45	IS30_IS30	1763370	1764590.0	NC_000913.3_art_ISs	1762969.0	1763369.0		1764591.0	1764991.0	NC_000913.3	1705582.0				1706383.0	IS only present in query Strain.	1. DLIS	Complete IS hit.	b1626	conserved inner membrane protein YdgK	b1628	SoxR [2Fe-2S] reducing system protein RsxB	b1626	conserved inner membrane protein YdgK	b1628	SoxR [2Fe-2S] reducing system protein RsxB	4763752.0
1	1						49	1767126	384	400	46	IS30_IS30	1767126	1768346.0	NC_000913.3_art_ISs	1766725.0	1767125.0		1768347.0	1768747.0	NC_000913.3	1708117.0				1708918.0	IS only present in query Strain.	1. DLIS	Complete IS hit.	-	Intergenic/Pseudo/Repeaed Region	-	Intergenic/Pseudo/Repeaed Region	b1629	SoxR [2Fe-2S] reducing system protein RsxC	b1629	SoxR [2Fe-2S] reducing system protein RsxC	4763752.0
1	1						50	1803050	385	400	47	IS30_IS30	1803050	1804270.0	NC_000913.3_art_ISs	1802649.0	1803049.0		1804271.0	1804671.0	NC_000913.3	1742820.0				1743621.0	IS only present in query Strain.	1. DLIS	Complete IS hit.	-	Intergenic/Pseudo/Repeaed Region	b1663	multidrug efflux pump MdtK	b1662	riboflavin synthase	b1663	multidrug efflux pump MdtK	4763752.0
	1			1			51	1869279	386	400	95	IS30_IS30	1869279	1870499.0	NC_000913.3_art_ISs	1868878.0	1869278.0		1870500.0	1870900.0							IS only present in query Strain.	2. Verify manually, possible false positive caused by consecutive ISs.		-	Intergenic/Pseudo/Repeaed Region	-	Intergenic/Pseudo/Repeaed Region	-	-	-	-	4763752.0
	1			1			52	1870520	387	400	96	IS30_IS30	1870520	1871740.0	NC_000913.3_art_ISs	1870119.0	1870519.0		1871741.0	1872141.0							IS only present in query Strain.	2. Verify manually, possible false positive caused by consecutive ISs.		-	Intergenic/Pseudo/Repeaed Region	-	Intergenic/Pseudo/Repeaed Region	-	-	-	-	4763752.0
1	1						53	1904586	388	400	48	IS30_IS30	1904586	1905806.0	NC_000913.3_art_ISs	1904185.0	1904585.0		1905807.0	1906207.0	NC_000913.3	1840693.0				1841494.0	IS only present in query Strain.	1. DLIS	Complete IS hit.	b1757	molybdopterin synthase sulfurtransferase	b1759	5-hydroxy-CTP diphosphatase	b1757	molybdopterin synthase sulfurtransferase	b1759	5-hydroxy-CTP diphosphatase	4763752.0
1	1						54	1932848	389	400	49	IS30_IS30	1932848	1934068.0	NC_000913.3_art_ISs	1932447.0	1932847.0		1934069.0	1934469.0	NC_000913.3	1867734.0				1868535.0	IS only present in query Strain.	1. DLIS	Complete IS hit.	-	Intergenic/Pseudo/Repeaed Region	-	Intergenic/Pseudo/Repeaed Region	b1783	protein kinase YeaG	b1783	protein kinase YeaG	4763752.0
1	1						55	1937860	390	400	50	IS30_IS30	1937860	1939080.0	NC_000913.3_art_ISs	1937459.0	1937859.0		1939081.0	1939481.0	NC_000913.3	1871525.0				1872326.0	IS only present in query Strain.	1. DLIS	Complete IS hit.	b1785	putative c-di-GMP binding protein CdgI	b1786	putative diguanylate cyclase DgcJ	b1785	putative c-di-GMP binding protein CdgI	b1786	putative diguanylate cyclase DgcJ	4763752.0
1	1						56	2146825	391	400	51	IS30_IS30	2146825	2148045.0	NC_000913.3_art_ISs	2146424.0	2146824.0		2148046.0	2148446.0	NC_000913.3	2079269.0				2080070.0	IS only present in query Strain.	1. DLIS	Complete IS hit.	b2007	DUF496 domain-containing protein YeeX	-	Intergenic/Pseudo/Repeaed Region	b2007	DUF496 domain-containing protein YeeX	b2008	putative transporter YeeA	4763752.0
1	1						57	2291220	392	400	52	IS30_IS30	2291220	2292440.0	NC_000913.3_art_ISs	2290819.0	2291219.0		2292441.0	2292841.0	NC_000913.3	2222443.0				2223244.0	IS only present in query Strain.	1. DLIS	Complete IS hit.	-	Intergenic/Pseudo/Repeaed Region	-	Intergenic/Pseudo/Repeaed Region	b2133	D-lactate dehydrogenase	b2133	D-lactate dehydrogenase	4763752.0
1	1						58	2302324	393	400	53	IS30_IS30	2302324	2303544.0	NC_000913.3_art_ISs	2301923.0	2302323.0		2303545.0	2303945.0	NC_000913.3	2232326.0				2233127.0	IS only present in query Strain.	1. DLIS	Complete IS hit.	-	Intergenic/Pseudo/Repeaed Region	b2144	DUF218 domain-containing protein SanA	b2143	cytidine/deoxycytidine deaminase	b2144	DUF218 domain-containing protein SanA	4763752.0
1	1						59	2305151	394	400	54	IS30_IS30	2305151	2306371.0	NC_000913.3_art_ISs	2304750.0	2305150.0		2306372.0	2306772.0	NC_000913.3	2233932.0				2234733.0	IS only present in query Strain.	1. DLIS	Complete IS hit.	-	Intergenic/Pseudo/Repeaed Region	-	Intergenic/Pseudo/Repeaed Region	-	Intergenic/Pseudo/Repeaed Region	b2146	NAD-dependent dihydropyrimidine dehydrogenase subunit PreT	4763752.0
	1			1			60	2314302	395	400	97	IS30_IS30	2314302	2315125.0	NC_000913.3_art_ISs	2313901.0	2314301.0		2315126.0	2315526.0							IS only present in query Strain.	2. Verify manually, possible false positive caused by consecutive ISs.	Partial IS hit.	-	Intergenic/Pseudo/Repeaed Region	-	Intergenic/Pseudo/Repeaed Region	-	-	-	-	4763752.0
	1			1			61	2315125	396	400	98	IS30_IS30	2315125	2315756.0	NC_000913.3_art_ISs	2314724.0	2315124.0		2315757.0	2316157.0							IS only present in query Strain.	2. Verify manually, possible false positive caused by consecutive ISs.	Partial IS hit.	-	Intergenic/Pseudo/Repeaed Region	-	Intergenic/Pseudo/Repeaed Region	-	-	-	-	4763752.0
	1			1			62	2315757	397	400	99	IS30_IS30	2315757	2316977.0	NC_000913.3_art_ISs	2315356.0	2315756.0		2316978.0	2317378.0	NC_000913.3	270772.0				271573.0	IS only present in query Strain.	2. Verify manually, possible false positive caused by consecutive ISs.	Complete IS hit.	-	Intergenic/Pseudo/Repeaed Region	-	Intergenic/Pseudo/Repeaed Region	b0256	IS30 transposase	b0256	IS30 transposase	4763752.0
1	1						63	2331004	398	400	55	IS30_IS30	2331004	2332224.0	NC_000913.3_art_ISs	2330603.0	2331003.0		2332225.0	2332625.0	NC_000913.3	2254901.0				2255702.0	IS only present in query Strain.	1. DLIS	Complete IS hit.	b2162	pyrimidine-specific ribonucleoside hydrolase RihB	b2163	putative DNA-binding transcriptional regulator YeiL	b2162	pyrimidine-specific ribonucleoside hydrolase RihB	b2163	putative DNA-binding transcriptional regulator YeiL	4763752.0
1	1						64	2338335	399	400	56	IS30_IS30	2338335	2339555.0	NC_000913.3_art_ISs	2337934.0	2338334.0		2339556.0	2339956.0	NC_000913.3	2261011.0				2261812.0	IS only present in query Strain.	1. DLIS	Complete IS hit.	b2167	fructose-specific PTS multiphosphoryl transfer protein FruA	b2168	1-phosphofructokinase	b2167	fructose-specific PTS multiphosphoryl transfer protein FruA	b2168	1-phosphofructokinase	4763752.0
1	1						65	2415048	400	400	57	IS30_IS30	2415048	2416268.0	NC_000913.3_art_ISs	2414647.0	2415047.0		2416269.0	2416669.0	NC_000913.3	2336503.0				2337304.0	IS only present in query Strain.	1. DLIS	Complete IS hit.	b2230	DUF2138 domain-containing protein YfaA	-	Intergenic/Pseudo/Repeaed Region	b2230	DUF2138 domain-containing protein YfaA	b2231	DNA gyrase subunit A	4763752.0
1	1						66	2462961	401	400	58	IS30_IS30	2462961	2464181.0	NC_000913.3_art_ISs	2462560.0	2462960.0		2464182.0	2464582.0	NC_000913.3	2383195.0				2383996.0	IS only present in query Strain.	1. DLIS	Complete IS hit.	-	Intergenic/Pseudo/Repeaed Region	b2270	IPR002035/DUF3520 domain-containing protein YfbK	b2269	protease ElaD	b2270	IPR002035/DUF3520 domain-containing protein YfbK	4763752.0
1	1						67	2528130	402	400	59	IS30_IS30	2528130	2529350.0	NC_000913.3_art_ISs	2527729.0	2528129.0		2529351.0	2529751.0	NC_000913.3	2447143.0				2447944.0	IS only present in query Strain.	1. DLIS	Complete IS hit.	b2329	chorismate synthase	-	Intergenic/Pseudo/Repeaed Region	b2329	chorismate synthase	b2330	50S ribosomal subunit protein L3 N(5)-glutamine methyltransferase	4763752.0
1	1						68	2951446	403	400	60	IS30_IS30	2951446	2952666.0	NC_000913.3_art_ISs	2951045.0	2951445.0		2952667.0	2953067.0	NC_000913.3	2869238.0				2870039.0	IS only present in query Strain.	1. DLIS	Complete IS hit.	b2743	L-isoaspartate protein carboxylmethyltransferase type II	-	Intergenic/Pseudo/Repeaed Region	b2743	L-isoaspartate protein carboxylmethyltransferase type II	b2744	broad specificity 5'(3')-nucleotidase and polyphosphatase	4763752.0
1	1						69	2954441	404	400	61	IS30_IS30	2954441	2955661.0	NC_000913.3_art_ISs	2954040.0	2954440.0		2955662.0	2956062.0	NC_000913.3	2871012.0				2871813.0	IS only present in query Strain.	1. DLIS	Complete IS hit.	b2745	tRNA pseudouridine(13) synthase	b2747	2-C-methyl-D-erythritol 4-phosphate cytidylyltransferase	b2745	tRNA pseudouridine(13) synthase	b2747	2-C-methyl-D-erythritol 4-phosphate cytidylyltransferase	4763752.0
1	1						70	2983613	405	400	62	IS30_IS30	2983613	2984833.0	NC_000913.3_art_ISs	2983212.0	2983612.0		2984834.0	2985234.0	NC_000913.3	2898963.0				2899764.0	IS only present in query Strain.	1. DLIS	Complete IS hit.	-	Intergenic/Pseudo/Repeaed Region	b2774	putative deoxygluconate dehydrogenase	b4463	putative FAD-containing dehydrogenase	b2774	putative deoxygluconate dehydrogenase	4763752.0
1	1						71	3057300	406	400	63	IS30_IS30	3057300	3058520.0	NC_000913.3_art_ISs	3056899.0	3057299.0		3058521.0	3058921.0	NC_000913.3	2971429.0				2972230.0	IS only present in query Strain.	1. DLIS	Complete IS hit.	b2833	DUF903 domain-containing lipoprotein YgdR	-	Intergenic/Pseudo/Repeaed Region	b2833	DUF903 domain-containing lipoprotein YgdR	b2834	putative NADP(H)-dependent aldo-keto reductase Tas	4763752.0
1	1						72	3104435	407	400	64	IS30_IS30	3104435	3105655.0	NC_000913.3_art_ISs	3104034.0	3104434.0		3105656.0	3106056.0	NC_000913.3	3017343.0				3018144.0	IS only present in query Strain.	1. DLIS	Complete IS hit.	-	Intergenic/Pseudo/Repeaed Region	-	Intergenic/Pseudo/Repeaed Region	b2878	putative oxidoreductase; Fe-S subunit	b2878	putative oxidoreductase; Fe-S subunit	4763752.0
1	1						73	3137784	408	400	65	IS30_IS30	3137784	3139004.0	NC_000913.3_art_ISs	3137383.0	3137783.0		3139005.0	3139405.0	NC_000913.3	3049471.0				3050272.0	IS only present in query Strain.	1. DLIS	Complete IS hit.	b2904	glycine cleavage system H protein	-	Intergenic/Pseudo/Repeaed Region	b2904	glycine cleavage system H protein	b2905	aminomethyltransferase	4763752.0
1	1						74	3161238	409	400	66	IS30_IS30	3161238	3162458.0	NC_000913.3_art_ISs	3160837.0	3161237.0		3162459.0	3162859.0	NC_000913.3	3071704.0				3072505.0	IS only present in query Strain.	1. DLIS	Complete IS hit.	-	Intergenic/Pseudo/Repeaed Region	-	Intergenic/Pseudo/Repeaed Region	b2926	phosphoglycerate kinase	b2926	phosphoglycerate kinase	4763752.0
1	1						75	3226249	410	400	67	IS30_IS30	3226249	3227469.0	NC_000913.3_art_ISs	3225848.0	3226248.0		3227470.0	3227870.0	NC_000913.3	3135494.0				3136295.0	IS only present in query Strain.	1. DLIS	Complete IS hit.	-	Intergenic/Pseudo/Repeaed Region	-	Intergenic/Pseudo/Repeaed Region	b2987	metal phosphate:H(+) symporter PitB	b2987	metal phosphate:H(+) symporter PitB	4763752.0
1	1						76	3361527	411	400	68	IS30_IS30	3361527	3362747.0	NC_000913.3_art_ISs	3361126.0	3361526.0		3362748.0	3363148.0	NC_000913.3	3269551.0				3270352.0	IS only present in query Strain.	1. DLIS	Complete IS hit.	b3121	uncharacterized protein YhaC	-	Intergenic/Pseudo/Repeaed Region	b3121	uncharacterized protein YhaC	-	Intergenic/Pseudo/Repeaed Region	4763752.0
1	1						77	3386688	412	400	69	IS30_IS30	3386688	3387908.0	NC_000913.3_art_ISs	3386287.0	3386687.0		3387909.0	3388309.0	NC_000913.3	3293491.0				3294292.0	IS only present in query Strain.	1. DLIS	Complete IS hit.	-	Intergenic/Pseudo/Repeaed Region	-	Intergenic/Pseudo/Repeaed Region	b3147	outer membrane lipoprotein - activator of MrcA activity	b3147	outer membrane lipoprotein - activator of MrcA activity	4763752.0
1	1						78	3441448	413	400	70	IS30_IS30	3441448	3442668.0	NC_000913.3_art_ISs	3441047.0	3441447.0		3442669.0	3443069.0	NC_000913.3	3347030.0				3347831.0	IS only present in query Strain.	1. DLIS	Complete IS hit.	b3204	phosphotransferase system enzyme IIA(Ntr)	-	Intergenic/Pseudo/Repeaed Region	b3204	phosphotransferase system enzyme IIA(Ntr)	b3205	RNase adaptor protein	4763752.0
1	1						79	3596382	414	400	71	IS30_IS30	3596382	3597602.0	NC_000913.3_art_ISs	3595981.0	3596381.0		3597603.0	3598003.0	NC_000913.3	3500743.0				3501544.0	IS only present in query Strain.	1. DLIS	Complete IS hit.	-	Intergenic/Pseudo/Repeaed Region	b3371	fructoselysine 6-phosphate deglycase	b3370	fructoselysine/psicoselysine transporter	b3371	fructoselysine 6-phosphate deglycase	4763752.0
1	1						80	3615538	415	400	72	IS30_IS30	3615538	3616758.0	NC_000913.3_art_ISs	3615137.0	3615537.0		3616759.0	3617159.0	NC_000913.3	3518678.0				3519479.0	IS only present in query Strain.	1. DLIS	Complete IS hit.	b3390	shikimate kinase 1	-	Intergenic/Pseudo/Repeaed Region	b3390	shikimate kinase 1	b3391	DNA utilization protein HofQ	4763752.0
1	1						81	3617769	416	400	73	IS30_IS30	3617769	3618989.0	NC_000913.3_art_ISs	3617368.0	3617768.0		3618990.0	3619390.0	NC_000913.3	3519688.0				3520489.0	IS only present in query Strain.	1. DLIS	Complete IS hit.	-	Intergenic/Pseudo/Repeaed Region	-	Intergenic/Pseudo/Repeaed Region	b3391	DNA utilization protein HofQ	b3391	DNA utilization protein HofQ	4763752.0
1	1						82	3654946	417	400	74	IS30_IS30	3654946	3656166.0	NC_000913.3_art_ISs	3654545.0	3654945.0		3656167.0	3656567.0	NC_000913.3	3555644.0				3556445.0	IS only present in query Strain.	1. DLIS	Complete IS hit.	b3418	DNA-binding transcriptional activator MalT	-	Intergenic/Pseudo/Repeaed Region	b3418	DNA-binding transcriptional activator MalT	b4475	RNA 3'-terminal phosphate cyclase	4763752.0
1	1						83	3658126	418	400	75	IS30_IS30	3658126	3659346.0	NC_000913.3_art_ISs	3657725.0	3658125.0		3659347.0	3659747.0	NC_000913.3	3557603.0				3558404.0	IS only present in query Strain.	1. DLIS	Complete IS hit.	-	Intergenic/Pseudo/Repeaed Region	b3422	DNA-binding transcriptional activator RtcR	b3421	RNA-splicing ligase	b3422	DNA-binding transcriptional activator RtcR	4763752.0
1	1						84	3727323	419	400	76	IS30_IS30	3727323	3728543.0	NC_000913.3_art_ISs	3726922.0	3727322.0		3728544.0	3728944.0	NC_000913.3	3625579.0				3626380.0	IS only present in query Strain.	1. DLIS	Complete IS hit.	-	Intergenic/Pseudo/Repeaed Region	-	Intergenic/Pseudo/Repeaed Region	-	Intergenic/Pseudo/Repeaed Region	b3485	ABC transporter family protein YhhJ	4763752.0
1	1						85	3766127	420	400	77	IS30_IS30	3766127	3767347.0	NC_000913.3_art_ISs	3765726.0	3766126.0		3767348.0	3767748.0	NC_000913.3	3663162.0				3663963.0	IS only present in query Strain.	1. DLIS	Complete IS hit.	b3514	multidrug efflux pump RND permease MdtF	b3515	DNA-binding transcriptional dual regulator GadW	b3514	multidrug efflux pump RND permease MdtF	b3515	DNA-binding transcriptional dual regulator GadW	4763752.0
1	1						86	3798695	421	400	78	IS30_IS30	3798695	3799915.0	NC_000913.3_art_ISs	3798294.0	3798694.0		3799916.0	3800316.0	NC_000913.3	3694509.0				3695310.0	IS only present in query Strain.	1. DLIS	Complete IS hit.	-	Intergenic/Pseudo/Repeaed Region	b3534	cellulose biosynthesis protein	b3533	cellulose synthase catalytic subunit	b3534	cellulose biosynthesis protein	4763752.0
1	1						87	3900620	422	400	79	IS30_IS30	3900620	3901840.0	NC_000913.3_art_ISs	3900219.0	3900619.0		3901841.0	3902241.0	NC_000913.3	3795213.0				3796014.0	IS only present in query Strain.	1. DLIS	Complete IS hit.	-	Intergenic/Pseudo/Repeaed Region	b3621	ADP-heptose:LPS heptosyltransferase 1	b3620	ADP-heptose--LPS heptosyltransferase 2	b3621	ADP-heptose:LPS heptosyltransferase 1	4763752.0
1	1						88	4006509	423	400	80	IS30_IS30	4006509	4007729.0	NC_000913.3_art_ISs	4006108.0	4006508.0		4007730.0	4008130.0	NC_000913.3	3899881.0				3900682.0	IS only present in query Strain.	1. DLIS	Complete IS hit.	-	Intergenic/Pseudo/Repeaed Region	b3720	carbohydrate-specific outer membrane porin; cryptic	b3719	putative hydrolase YieL	b3720	carbohydrate-specific outer membrane porin; cryptic	4763752.0
1	1						89	4013286	424	400	81	IS30_IS30	4013286	4014506.0	NC_000913.3_art_ISs	4012885.0	4013285.0		4014507.0	4014907.0	NC_000913.3	3905437.0				3906238.0	IS only present in query Strain.	1. DLIS	Complete IS hit.	b3722	beta-glucoside specific PTS enzyme II/BglG kinase/BglG phosphatase	-	Intergenic/Pseudo/Repeaed Region	b3722	beta-glucoside specific PTS enzyme II/BglG kinase/BglG phosphatase	b3723	transcriptional antiterminator BglG	4763752.0
1	1						90	4027534	425	400	82	IS30_IS30	4027534	4028754.0	NC_000913.3_art_ISs	4027133.0	4027533.0		4028755.0	4029155.0	NC_000913.3	3918464.0				3919265.0	IS only present in query Strain.	1. DLIS	Complete IS hit.	-	Intergenic/Pseudo/Repeaed Region	-	Intergenic/Pseudo/Repeaed Region	b3734	ATP synthase F1 complex subunit alpha	b3734	ATP synthase F1 complex subunit alpha	4763752.0
1	1						91	4248889	426	400	83	IS30_IS30	4248889	4250109.0	NC_000913.3_art_ISs	4248488.0	4248888.0		4250110.0	4250510.0	NC_000913.3	4138598.0				4139399.0	IS only present in query Strain.	1. DLIS	Complete IS hit.	-	Intergenic/Pseudo/Repeaed Region	b3946	fructose-6-phosphate aldolase 2	b3945	L-1;2-propanediol dehydrogenase/glycerol dehydrogenase	b3946	fructose-6-phosphate aldolase 2	4763752.0
1	1						92	4260696	427	400	84	IS30_IS30	4260696	4261916.0	NC_000913.3_art_ISs	4260295.0	4260695.0		4261917.0	4262317.0	NC_000913.3	4149184.0				4149985.0	IS only present in query Strain.	1. DLIS	Complete IS hit.	-	Intergenic/Pseudo/Repeaed Region	-	Intergenic/Pseudo/Repeaed Region	b3955	phosphoethanolamine transferase EptC	b3955	phosphoethanolamine transferase EptC	4763752.0
1	1						93	4264502	428	400	85	IS30_IS30	4264502	4265722.0	NC_000913.3_art_ISs	4264101.0	4264501.0		4265723.0	4266123.0	NC_000913.3	4151769.0				4152570.0	IS only present in query Strain.	1. DLIS	Complete IS hit.	-	Intergenic/Pseudo/Repeaed Region	-	Intergenic/Pseudo/Repeaed Region	b3956	phosphoenolpyruvate carboxylase	b3956	phosphoenolpyruvate carboxylase	4763752.0
1	1						94	4311821	429	400	86	IS30_IS30	4311821	4313041.0	NC_000913.3_art_ISs	4311420.0	4311820.0		4313042.0	4313442.0	NC_000913.3	4197867.0				4198668.0	IS only present in query Strain.	1. DLIS	Complete IS hit.	-	Intergenic/Pseudo/Repeaed Region	-	Intergenic/Pseudo/Repeaed Region	b3997	uroporphyrinogen decarboxylase	b3997	uroporphyrinogen decarboxylase	4763752.0
1	1						95	4389275	430	400	87	IS30_IS30	4389275	4390495.0	NC_000913.3_art_ISs	4388874.0	4389274.0		4390496.0	4390896.0	NC_000913.3	4274100.0				4274901.0	IS only present in query Strain.	1. DLIS	Complete IS hit.	-	Intergenic/Pseudo/Repeaed Region	b4060	uncharacterized protein YjcB	-	Intergenic/Pseudo/Repeaed Region	b4060	uncharacterized protein YjcB	4763752.0
1	1						96	4434397	431	400	88	IS30_IS30	4434397	4435617.0	NC_000913.3_art_ISs	4433996.0	4434396.0		4435618.0	4436018.0	NC_000913.3	4318001.0				4318802.0	IS only present in query Strain.	1. DLIS	Complete IS hit.	-	Intergenic/Pseudo/Repeaed Region	b4098	carbon-phosphorus lyase core complex subunit PhnJ	-	Intergenic/Pseudo/Repeaed Region	b4098	carbon-phosphorus lyase core complex subunit PhnJ	4763752.0
	1			1			97	4461112	432	400	102	IS30_IS30	4461112	4461482.0	NC_000913.3_art_ISs	4460711.0	4461111.0		4461483.0	4461883.0							IS only present in query Strain.	2. Verify manually, possible false positive caused by consecutive ISs.	Partial IS hit.	-	Intergenic/Pseudo/Repeaed Region	-	Intergenic/Pseudo/Repeaed Region	-	-	-	-	4763752.0
	1			1			98	4461481	433	400	103	IS30_IS30	4461481	4462701.0	NC_000913.3_art_ISs	4461080.0	4461480.0		4462702.0	4463102.0	NC_000913.3	270992.0				271761.0	IS only present in query Strain.	2. Verify manually, possible false positive caused by consecutive ISs.	Complete IS hit.	-	Intergenic/Pseudo/Repeaed Region	-	Intergenic/Pseudo/Repeaed Region	b0256	IS30 transposase	-	Intergenic/Pseudo/Repeaed Region	4763752.0
1	1						99	4509587	434	400	89	IS30_IS30	4509587	4510807.0	NC_000913.3_art_ISs	4509186.0	4509586.0		4510808.0	4511208.0	NC_000913.3	4389528.0				4390329.0	IS only present in query Strain.	1. DLIS	Complete IS hit.	-	Intergenic/Pseudo/Repeaed Region	-	Intergenic/Pseudo/Repeaed Region	b4160	phosphatidylserine decarboxylase proenzyme	b4160	phosphatidylserine decarboxylase proenzyme	4763752.0
1	1						100	4524761	435	400	90	IS30_IS30	4524761	4525981.0	NC_000913.3_art_ISs	4524360.0	4524760.0		4525982.0	4526382.0	NC_000913.3	4403481.0				4404282.0	IS only present in query Strain.	1. DLIS	Complete IS hit.	-	Intergenic/Pseudo/Repeaed Region	-	Intergenic/Pseudo/Repeaed Region	b4175	regulator of FtsH protease	b4175	regulator of FtsH protease	4763752.0
			1						436	400	92	IS30_IS30	249701	250822.0	NC_000913.3_art_ISs	249300.0	249700.0		250823.0	251223.0							IS only present in query Strain.	2. Verify manually, possible false positive caused by consecutive ISs.	Partial IS hit.	-	Intergenic/Pseudo/Repeaed Region	-	Intergenic/Pseudo/Repeaed Region	-	-	-	-	4763752.0
			1						437	400	93	ISEc1_ISAs1	736682	737971.0	NC_000913.3_art_ISs	763143.0				763967.0	NC_000913.3	736281.0	736681.0		737972.0	738372.0	IS only present in ref Strain.	2. Verify manually, possible false positive caused by consecutive ISs.	Complete IS hit.	-	Intergenic/Pseudo/Repeaed Region	b0705	putative transposase YbfL	b0681	chitobiose outer membrane channel	b0684	flavodoxin 1	4641652.0
			1						438	400	94	ISEc1_ISAs1	763544	764833.0	NC_000913.3_art_ISs	763143.0	763543.0		764834.0	765234.0	NC_000913.3	736281.0				737105.0	IS only present in query Strain.	2. Verify manually, possible false positive caused by consecutive ISs.	Complete IS hit.	b4514	inactive transposase YbfQ	b0706	H repeat-associated putative transposase YbfD	-	Intergenic/Pseudo/Repeaed Region	b0705	putative transposase YbfL	4763752.0
			1						439	400	100	IS30_IS30	2316971	2317566.0	NC_000913.3_art_ISs	2316570.0	2316970.0		2317567.0	2317967.0							IS only present in query Strain.	2. Verify manually, possible false positive caused by consecutive ISs.	Partial IS hit.	-	Intergenic/Pseudo/Repeaed Region	-	Intergenic/Pseudo/Repeaed Region	-	-	-	-	4763752.0
			1						440	400	101	IS30_IS30	2317567	2317964.0	NC_000913.3_art_ISs	2317166.0	2317566.0		2317965.0	2318365.0							IS only present in query Strain.	2. Verify manually, possible false positive caused by consecutive ISs.	Partial IS hit.	-	Intergenic/Pseudo/Repeaed Region	-	Intergenic/Pseudo/Repeaed Region	-	-	-	-	4763752.0
			1						441	400	104	IS30_IS30	4462702	4463553.0	NC_000913.3_art_ISs	4462301.0	4462701.0		4463554.0	4463954.0							IS only present in query Strain.	2. Verify manually, possible false positive caused by consecutive ISs.	Partial IS hit.	-	Intergenic/Pseudo/Repeaed Region	-	Intergenic/Pseudo/Repeaed Region	-	-	-	-	4763752.0
			1						442	400	105	IS2_IS2_IS3	399833	400905.0	NC_000913.3_art_ISs	399432.0	399832.0		400906.0	401306.0							IS only present in query Strain.	5. Discarded for analysis. There were multiple blastn hits, and left and right pairs could not be determined.	Partial IS hit.	-	Intergenic/Pseudo/Repeaed Region	b0363	putative glucosyltransferase	-	-	-	-	4763752.0
91	99	0	7	9	1	*			443	400
1	1						1	446	444	500	0	IS30_IS30	446	1666.0	NC_000913.3_art_ISs	1.0	445.0		1667.0	2167.0	NC_000913.3	1.0				946.0	IS only present in query Strain.	1. DLIS	Complete IS hit.	-	Intergenic/Pseudo/Repeaed Region	-	Intergenic/Pseudo/Repeaed Region	-	Intergenic/Pseudo/Repeaed Region	b0002	fused aspartate kinase/homoserine dehydrogenase 1	4763752.0
1	1						2	3160	445	500	1	IS30_IS30	3160	4380.0	NC_000913.3_art_ISs	2659.0	3159.0		4381.0	4881.0	NC_000913.3	1438.0				2439.0	IS only present in query Strain.	1. DLIS	Complete IS hit.	-	Intergenic/Pseudo/Repeaed Region	-	Intergenic/Pseudo/Repeaed Region	b0002	fused aspartate kinase/homoserine dehydrogenase 1	b0002	fused aspartate kinase/homoserine dehydrogenase 1	4763752.0
1	1						3	123711	446	500	2	IS30_IS30	123711	124931.0	NC_000913.3_art_ISs	123210.0	123710.0		124932.0	125432.0	NC_000913.3	120768.0				121769.0	IS only present in query Strain.	1. DLIS	Complete IS hit.	-	Intergenic/Pseudo/Repeaed Region	-	Intergenic/Pseudo/Repeaed Region	b0112	aromatic amino acid:H(+) symporter AroP	-	Intergenic/Pseudo/Repeaed Region	4763752.0
1	1						4	142989	447	500	3	IS30_IS30	142989	144209.0	NC_000913.3_art_ISs	142488.0	142988.0		144210.0	144710.0	NC_000913.3	138825.0				139826.0	IS only present in query Strain.	1. DLIS	Complete IS hit.	-	Intergenic/Pseudo/Repeaed Region	-	Intergenic/Pseudo/Repeaed Region	-	Intergenic/Pseudo/Repeaed Region	b0124	quinoprotein glucose dehydrogenase	4763752.0
1	1						5	163498	448	500	4	IS30_IS30	163498	164718.0	NC_000913.3_art_ISs	162997.0	163497.0		164719.0	165219.0	NC_000913.3	158113.0				159114.0	IS only present in query Strain.	1. DLIS	Complete IS hit.	-	Intergenic/Pseudo/Repeaed Region	-	Intergenic/Pseudo/Repeaed Region	b0143	poly(A) polymerase I	b0143	poly(A) polymerase I	4763752.0
1	1						6	240046	449	500	5	IS30_IS30	240046	241266.0	NC_000913.3_art_ISs	239545.0	240045.0		241267.0	241767.0	NC_000913.3	233440.0				234441.0	IS only present in query Strain.	1. DLIS	Complete IS hit.	-	Intergenic/Pseudo/Repeaed Region	b0212	hydroxyacylglutathione hydrolase GloB	b0211	membrane-bound lytic murein transglycosylase D	b0212	hydroxyacylglutathione hydrolase GloB	4763752.0
				1	1		7	248381	450	500
	1			1			8	248480	451	500	91	IS30_IS30	248480	249700.0	NC_000913.3_art_ISs	247979.0	248479.0		249701.0	250201.0							IS only present in query Strain.	2. Verify manually, possible false positive caused by consecutive ISs.		b0220	periplasmic chaperone; inhibitor of vertebrate C-type lysozyme	-	Intergenic/Pseudo/Repeaed Region	-	-	-	-	4763752.0
1	1						9	310515	452	500	6	IS30_IS30	310515	311735.0	NC_000913.3_art_ISs	310014.0	310514.0		311736.0	312236.0	NC_000913.3	300246.0				301247.0	IS only present in query Strain.	1. DLIS	Complete IS hit.	-	Intergenic/Pseudo/Repeaed Region	b0285	aldehyde dehydrogenase; FAD-binding subunit	b0284	aldehyde dehydrogenase: molybdenum cofactor-binding subunit	b0285	aldehyde dehydrogenase; FAD-binding subunit	4763752.0
1	1						10	315801	453	500	7	IS30_IS30	315801	317021.0	NC_000913.3_art_ISs	315300.0	315800.0		317022.0	317522.0	NC_000913.3	304311.0				305312.0	IS only present in query Strain.	1. DLIS	Complete IS hit.	-	Intergenic/Pseudo/Repeaed Region	b0290	fimbrial adhesin EcpD	-	Intergenic/Pseudo/Repeaed Region	b0290	fimbrial adhesin EcpD	4763752.0
1	1						11	333734	454	500	8	IS30_IS30	333734	334954.0	NC_000913.3_art_ISs	333233.0	333733.0		334955.0	335455.0	NC_000913.3	321023.0				322024.0	IS only present in query Strain.	1. DLIS	Complete IS hit.	b0305	DNA-binding transcriptional activator RclR	b0306	putative lactate utilization oxidoreductase YkgE	b0305	DNA-binding transcriptional activator RclR	b0306	putative lactate utilization oxidoreductase YkgE	4763752.0
1	1						12	356194	455	500	9	IS30_IS30	356194	357414.0	NC_000913.3_art_ISs	355693.0	356193.0		357415.0	357915.0	NC_000913.3	342262.0				343263.0	IS only present in query Strain.	1. DLIS	Complete IS hit.	b0324	putative deaminase with metallo-dependent hydrolase domain	b0325	aldehyde reductase; NADPH-dependent	b0324	putative deaminase with metallo-dependent hydrolase domain	b0325	aldehyde reductase; NADPH-dependent	4763752.0
1	1						13	361260	456	500	10	IS30_IS30	361260	362480.0	NC_000913.3_art_ISs	360759.0	361259.0		362481.0	362981.0	NC_000913.3	346107.0				347108.0	IS only present in query Strain.	1. DLIS	Complete IS hit.	b0328	putative amino acid exporter	b0330	DNA-binding transcriptional dual regulator PrpR	b0328	putative amino acid exporter	b0330	DNA-binding transcriptional dual regulator PrpR	4763752.0
1	1						14	395877	457	500	11	IS30_IS30	395877	397097.0	NC_000913.3_art_ISs	395376.0	395876.0		397098.0	397598.0	NC_000913.3	379503.0				380504.0	IS only present in query Strain.	1. DLIS	Complete IS hit.	b0356	S-(hydroxymethyl)glutathione dehydrogenase	b0358	outer membrane protein YaiO	b0356	S-(hydroxymethyl)glutathione dehydrogenase	b0358	outer membrane protein YaiO	4763752.0
1	1						15	398612	458	500	12	IS30_IS30	398612	399832.0	NC_000913.3_art_ISs	398111.0	398611.0		399833.0	400333.0	NC_000913.3	381017.0				382018.0	IS only present in query Strain.	1. DLIS	Complete IS hit.	-	Intergenic/Pseudo/Repeaed Region	b0361	IS2 element protein	b4579	putative acyltransferase; N-terminal fragment	b0361	IS2 element protein	4763752.0
1	1						16	458588	459	500	13	IS30_IS30	458588	459808.0	NC_000913.3_art_ISs	458087.0	458587.0		459809.0	460309.0	NC_000913.3	439772.0				440773.0	IS only present in query Strain.	1. DLIS	Complete IS hit.	b0420	1-deoxy-D-xylulose-5-phosphate synthase	-	Intergenic/Pseudo/Repeaed Region	b0420	1-deoxy-D-xylulose-5-phosphate synthase	b0421	geranyl diphosphate/farnesyl diphosphate synthase	4763752.0
1	1						17	515332	460	500	14	IS30_IS30	515332	516552.0	NC_000913.3_art_ISs	514831.0	515331.0		516553.0	517053.0	NC_000913.3	495295.0				496296.0	IS only present in query Strain.	1. DLIS	Complete IS hit.	-	Intergenic/Pseudo/Repeaed Region	-	Intergenic/Pseudo/Repeaed Region	b0473	chaperone protein HtpG	b0473	chaperone protein HtpG	4763752.0
1	1						18	518331	461	500	15	IS30_IS30	518331	519551.0	NC_000913.3_art_ISs	517830.0	518330.0		519552.0	520052.0	NC_000913.3	497073.0				498074.0	IS only present in query Strain.	1. DLIS	Complete IS hit.	-	Intergenic/Pseudo/Repeaed Region	b0475	ferrochelatase	-	Intergenic/Pseudo/Repeaed Region	b0475	ferrochelatase	4763752.0
1	1						19	564278	462	500	16	IS30_IS30	564278	565498.0	NC_000913.3_art_ISs	563777.0	564277.0		565499.0	565999.0	NC_000913.3	541799.0				542800.0	IS only present in query Strain.	1. DLIS	Complete IS hit.	b0513	putative purine transporter	-	Intergenic/Pseudo/Repeaed Region	b0513	putative purine transporter	b0514	glycerate 2-kinase 2	4763752.0
1	1						20	638410	463	500	17	IS30_IS30	638410	639630.0	NC_000913.3_art_ISs	637909.0	638409.0		639631.0	640131.0	NC_000913.3	614710.0				615711.0	IS only present in query Strain.	1. DLIS	Complete IS hit.	-	Intergenic/Pseudo/Repeaed Region	-	Intergenic/Pseudo/Repeaed Region	b0586	apo-serine activating enzyme	b0586	apo-serine activating enzyme	4763752.0
1	1						21	643571	464	500	18	IS30_IS30	643571	644791.0	NC_000913.3_art_ISs	643070.0	643570.0		644792.0	645292.0	NC_000913.3	618650.0				619651.0	IS only present in query Strain.	1. DLIS	Complete IS hit.	-	Intergenic/Pseudo/Repeaed Region	b0588	ferric enterobactin ABC transporter ATP binding subunit	b0587	polysaccharide co-polymerase family protein FepE	b0588	ferric enterobactin ABC transporter ATP binding subunit	4763752.0
1	1						22	709250	465	500	19	IS30_IS30	709250	710470.0	NC_000913.3_art_ISs	708749.0	709249.0		710471.0	710971.0	NC_000913.3	683108.0				684109.0	IS only present in query Strain.	1. DLIS	Complete IS hit.	b0650	chaperone protein HscC	-	Intergenic/Pseudo/Repeaed Region	b0650	chaperone protein HscC	b0651	pyrimidine-specific ribonucleoside hydrolase RihA	4763752.0
1	1						23	780879	466	500	20	IS30_IS30	780879	782099.0	NC_000913.3_art_ISs	780378.0	780878.0		782100.0	782600.0	NC_000913.3	753516.0				754517.0	IS only present in query Strain.	1. DLIS	Complete IS hit.	-	Intergenic/Pseudo/Repeaed Region	-	Intergenic/Pseudo/Repeaed Region	b0720	citrate synthase	-	Intergenic/Pseudo/Repeaed Region	4763752.0
1	1						24	794533	467	500	21	IS30_IS30	794533	795753.0	NC_000913.3_art_ISs	794032.0	794532.0		795754.0	796254.0	NC_000913.3	765949.0				766950.0	IS only present in query Strain.	1. DLIS	Complete IS hit.	-	Intergenic/Pseudo/Repeaed Region	-	Intergenic/Pseudo/Repeaed Region	-	Intergenic/Pseudo/Repeaed Region	b0731	2-O-alpha-mannosyl-D-glycerate specific PTS enzyme II	4763752.0
1	1						25	818746	468	500	22	IS30_IS30	818746	819966.0	NC_000913.3_art_ISs	818245.0	818745.0		819967.0	820467.0	NC_000913.3	788941.0				789942.0	IS only present in query Strain.	1. DLIS	Complete IS hit.	-	Intergenic/Pseudo/Repeaed Region	-	Intergenic/Pseudo/Repeaed Region	b0757	galactokinase	b0757	galactokinase	4763752.0
1	1						26	827842	469	500	23	IS30_IS30	827842	829062.0	NC_000913.3_art_ISs	827341.0	827841.0		829063.0	829563.0	NC_000913.3	796816.0				797817.0	IS only present in query Strain.	1. DLIS	Complete IS hit.	-	Intergenic/Pseudo/Repeaed Region	b0766	pyridoxal phosphate/fructose-1;6-bisphosphate phosphatase	b0765	molybdate ABC transporter ATP binding subunit	b0766	pyridoxal phosphate/fructose-1;6-bisphosphate phosphatase	4763752.0
1	1						27	840349	470	500	24	IS30_IS30	840349	841569.0	NC_000913.3_art_ISs	839848.0	840348.0		841570.0	842070.0	NC_000913.3	808102.0				809103.0	IS only present in query Strain.	1. DLIS	Complete IS hit.	-	Intergenic/Pseudo/Repeaed Region	-	Intergenic/Pseudo/Repeaed Region	b0774	adenosylmethionine-8-amino-7-oxononanoate aminotransferase	b0774	adenosylmethionine-8-amino-7-oxononanoate aminotransferase	4763752.0
1	1						28	866245	471	500	25	IS30_IS30	866245	867465.0	NC_000913.3_art_ISs	865744.0	866244.0		867466.0	867966.0	NC_000913.3	832777.0				833778.0	IS only present in query Strain.	1. DLIS	Complete IS hit.	b0798	N-glycosidase YbiA	-	Intergenic/Pseudo/Repeaed Region	b0798	N-glycosidase YbiA	b0799	ATP-dependent DNA helicase DinG	4763752.0
1	1						29	885800	472	500	26	IS30_IS30	885800	887020.0	NC_000913.3_art_ISs	885299.0	885799.0		887021.0	887521.0	NC_000913.3	851111.0				852112.0	IS only present in query Strain.	1. DLIS	Complete IS hit.	-	Intergenic/Pseudo/Repeaed Region	-	Intergenic/Pseudo/Repeaed Region	b0815	phosphoethanolamine transferase	b0815	phosphoethanolamine transferase	4763752.0
1	1						30	1054897	473	500	27	IS30_IS30	1054897	1056117.0	NC_000913.3_art_ISs	1054396.0	1054896.0		1056118.0	1056618.0	NC_000913.3	1018987.0				1019988.0	IS only present in query Strain.	1. DLIS	Complete IS hit.	-	Intergenic/Pseudo/Repeaed Region	-	Intergenic/Pseudo/Repeaed Region	-	Intergenic/Pseudo/Repeaed Region	b0957	outer membrane porin A	4763752.0
1	1						31	1102873	474	500	28	IS30_IS30	1102873	1104093.0	NC_000913.3_art_ISs	1102372.0	1102872.0		1104094.0	1104594.0	NC_000913.3	1065742.0				1066743.0	IS only present in query Strain.	1. DLIS	Complete IS hit.	-	Intergenic/Pseudo/Repeaed Region	-	Intergenic/Pseudo/Repeaed Region	b1002	glucose-1-phosphatase	b1002	glucose-1-phosphatase	4763752.0
1	1						32	1118119	475	500	29	IS30_IS30	1118119	1119339.0	NC_000913.3_art_ISs	1117618.0	1118118.0		1119340.0	1119840.0	NC_000913.3	1079767.0				1080768.0	IS only present in query Strain.	1. DLIS	Complete IS hit.	-	Intergenic/Pseudo/Repeaed Region	-	Intergenic/Pseudo/Repeaed Region	b1015	proline:Na(+) symporter	b1015	proline:Na(+) symporter	4763752.0
1	1						33	1150109	476	500	30	IS30_IS30	1150109	1151329.0	NC_000913.3_art_ISs	1149608.0	1150108.0		1151330.0	1151830.0	NC_000913.3	1110536.0				1111537.0	IS only present in query Strain.	1. DLIS	Complete IS hit.	b1048	osmoregulated periplasmic glucans (OPGs) biosynthesis protein G	-	Intergenic/Pseudo/Repeaed Region	b1048	osmoregulated periplasmic glucans (OPGs) biosynthesis protein G	b1049	osmoregulated periplasmic glucans (OPGs) biosynthesis protein H	4763752.0
1	1						34	1165669	477	500	31	IS30_IS30	1165669	1166889.0	NC_000913.3_art_ISs	1165168.0	1165668.0		1166890.0	1167390.0	NC_000913.3	1124875.0				1125876.0	IS only present in query Strain.	1. DLIS	Complete IS hit.	b1065	multidrug efflux pump MdtH	b1066	ribosomal-protein-S5-alanine N-acetyltransferase	b1065	multidrug efflux pump MdtH	b1066	ribosomal-protein-S5-alanine N-acetyltransferase	4763752.0
1	1						35	1252656	478	500	32	IS30_IS30	1252656	1253876.0	NC_000913.3_art_ISs	1252155.0	1252655.0		1253877.0	1254377.0	NC_000913.3	1210641.0				1211642.0	IS only present in query Strain.	1. DLIS	Complete IS hit.	-	Intergenic/Pseudo/Repeaed Region	-	Intergenic/Pseudo/Repeaed Region	b1159	e14 prophage; 5-methylcytosine-specific restriction enzyme McrA	-	Intergenic/Pseudo/Repeaed Region	4763752.0
1	1						36	1314729	479	500	33	IS30_IS30	1314729	1315949.0	NC_000913.3_art_ISs	1314228.0	1314728.0		1315950.0	1316450.0	NC_000913.3	1271493.0				1272494.0	IS only present in query Strain.	1. DLIS	Complete IS hit.	b1216	Na(+)/K(+):H(+) antiporter ChaA	-	Intergenic/Pseudo/Repeaed Region	b1216	Na(+)/K(+):H(+) antiporter ChaA	-	Intergenic/Pseudo/Repeaed Region	4763752.0
1	1						37	1316873	480	500	34	IS30_IS30	1316873	1318093.0	NC_000913.3_art_ISs	1316372.0	1316872.0		1318094.0	1318594.0	NC_000913.3	1272416.0				1273417.0	IS only present in query Strain.	1. DLIS	Complete IS hit.	-	Intergenic/Pseudo/Repeaed Region	b1219	DsrE/F sulfur relay family protein YchN	-	Intergenic/Pseudo/Repeaed Region	b1219	DsrE/F sulfur relay family protein YchN	4763752.0
1	1						38	1332696	481	500	35	IS30_IS30	1332696	1333916.0	NC_000913.3_art_ISs	1332195.0	1332695.0		1333917.0	1334417.0	NC_000913.3	1287018.0				1288019.0	IS only present in query Strain.	1. DLIS	Complete IS hit.	-	Intergenic/Pseudo/Repeaed Region	b1232	formyltetrahydrofolate deformylase	-	Intergenic/Pseudo/Repeaed Region	b1232	formyltetrahydrofolate deformylase	4763752.0
1	1						39	1477755	482	500	36	IS30_IS30	1477755	1478975.0	NC_000913.3_art_ISs	1477254.0	1477754.0		1478976.0	1479476.0	NC_000913.3	1430856.0				1431857.0	IS only present in query Strain.	1. DLIS	Complete IS hit.	-	Intergenic/Pseudo/Repeaed Region	-	Intergenic/Pseudo/Repeaed Region	b1372	Rac prophage; putative membrane protein	b1372	Rac prophage; putative membrane protein	4763752.0
1	1						40	1530090	483	500	37	IS30_IS30	1530090	1531310.0	NC_000913.3_art_ISs	1529589.0	1530089.0		1531311.0	1531811.0	NC_000913.3	1481970.0				1482971.0	IS only present in query Strain.	1. DLIS	Complete IS hit.	b1411	putative phosphatase	-	Intergenic/Pseudo/Repeaed Region	b1411	putative phosphatase	-	Intergenic/Pseudo/Repeaed Region	4763752.0
1	1						41	1599338	484	500	38	IS30_IS30	1599338	1600558.0	NC_000913.3_art_ISs	1598837.0	1599337.0		1600559.0	1601059.0	NC_000913.3	1549997.0				1550939.0	IS only present in query Strain.	1. DLIS	Complete IS hit.	b1474	formate dehydrogenase N subunit alpha	-	Intergenic/Pseudo/Repeaed Region	b1474	formate dehydrogenase N subunit alpha	b1475	formate dehydrogenase N subunit beta	4763752.0
1	1						42	1601001	485	500	39	IS30_IS30	1601001	1602221.0	NC_000913.3_art_ISs	1600500.0	1601000.0		1602222.0	1602722.0	NC_000913.3	1550498.0				1551440.0	IS only present in query Strain.	1. DLIS	Complete IS hit.	-	Intergenic/Pseudo/Repeaed Region	b1476	formate dehydrogenase N subunit gamma	b1475	formate dehydrogenase N subunit beta	b1476	formate dehydrogenase N subunit gamma	4763752.0
1	1						43	1614176	486	500	40	IS30_IS30	1614176	1615396.0	NC_000913.3_art_ISs	1613675.0	1614175.0		1615397.0	1615897.0	NC_000913.3	1562393.0				1563394.0	IS only present in query Strain.	1. DLIS	Complete IS hit.	b1487	putative D;D-dipeptide ABC transporter periplasmic binding protein	b1489	oxygen-sensing c-di-GMP phosphodiesterase DosP	b1487	putative D;D-dipeptide ABC transporter periplasmic binding protein	b1489	oxygen-sensing c-di-GMP phosphodiesterase DosP	4763752.0
1	1						44	1700984	487	500	41	IS30_IS30	1700984	1702204.0	NC_000913.3_art_ISs	1700483.0	1700983.0		1702205.0	1702705.0	NC_000913.3	1647980.0				1648981.0	IS only present in query Strain.	1. DLIS	Complete IS hit.	b1570	DNA-binding transcriptional dual regulator DicA	b1573	Qin prophage; uncharacterized protein YdfC	b1570	DNA-binding transcriptional dual regulator DicA	b1573	Qin prophage; uncharacterized protein YdfC	4763752.0
1	1						45	1724977	488	500	42	IS30_IS30	1724977	1726197.0	NC_000913.3_art_ISs	1724476.0	1724976.0		1726198.0	1726698.0	NC_000913.3	1670752.0				1671753.0	IS only present in query Strain.	1. DLIS	Complete IS hit.	b1596	putative transporter YnfM	-	Intergenic/Pseudo/Repeaed Region	b1596	putative transporter YnfM	-	Intergenic/Pseudo/Repeaed Region	4763752.0
1	1						46	1739082	489	500	43	IS30_IS30	1739082	1740302.0	NC_000913.3_art_ISs	1738581.0	1739081.0		1740303.0	1740803.0	NC_000913.3	1683636.0				1684637.0	IS only present in query Strain.	1. DLIS	Complete IS hit.	-	Intergenic/Pseudo/Repeaed Region	b1610	DNA replication terminus site-binding protein	b1609	sensory histidine kinase RstB	b1610	DNA replication terminus site-binding protein	4763752.0
1	1						47	1744580	490	500	44	IS30_IS30	1744580	1745800.0	NC_000913.3_art_ISs	1744079.0	1744579.0		1745801.0	1746301.0	NC_000913.3	1687913.0				1688914.0	IS only present in query Strain.	1. DLIS	Complete IS hit.	b1612	fumarase A	b1613	mannose-6-phosphate isomerase	b1612	fumarase A	b1613	mannose-6-phosphate isomerase	4763752.0
1	1						48	1763370	491	500	45	IS30_IS30	1763370	1764590.0	NC_000913.3_art_ISs	1762869.0	1763369.0		1764591.0	1765091.0	NC_000913.3	1705482.0				1706483.0	IS only present in query Strain.	1. DLIS	Complete IS hit.	b1626	conserved inner membrane protein YdgK	b1628	SoxR [2Fe-2S] reducing system protein RsxB	b1626	conserved inner membrane protein YdgK	b1628	SoxR [2Fe-2S] reducing system protein RsxB	4763752.0
1	1						49	1767126	492	500	46	IS30_IS30	1767126	1768346.0	NC_000913.3_art_ISs	1766625.0	1767125.0		1768347.0	1768847.0	NC_000913.3	1708017.0				1709018.0	IS only present in query Strain.	1. DLIS	Complete IS hit.	-	Intergenic/Pseudo/Repeaed Region	-	Intergenic/Pseudo/Repeaed Region	b1629	SoxR [2Fe-2S] reducing system protein RsxC	b1629	SoxR [2Fe-2S] reducing system protein RsxC	4763752.0
1	1						50	1803050	493	500	47	IS30_IS30	1803050	1804270.0	NC_000913.3_art_ISs	1802549.0	1803049.0		1804271.0	1804771.0	NC_000913.3	1742720.0				1743721.0	IS only present in query Strain.	1. DLIS	Complete IS hit.	-	Intergenic/Pseudo/Repeaed Region	b1663	multidrug efflux pump MdtK	b1662	riboflavin synthase	b1663	multidrug efflux pump MdtK	4763752.0
	1			1			51	1869279	494	500	95	IS30_IS30	1869279	1870499.0	NC_000913.3_art_ISs	1868778.0	1869278.0		1870500.0	1871000.0							IS only present in query Strain.	2. Verify manually, possible false positive caused by consecutive ISs.		-	Intergenic/Pseudo/Repeaed Region	-	Intergenic/Pseudo/Repeaed Region	-	-	-	-	4763752.0
	1			1			52	1870520	495	500	96	IS30_IS30	1870520	1871740.0	NC_000913.3_art_ISs	1870019.0	1870519.0		1871741.0	1872241.0							IS only present in query Strain.	2. Verify manually, possible false positive caused by consecutive ISs.		-	Intergenic/Pseudo/Repeaed Region	b1726	uncharacterized protein YniB	-	-	-	-	4763752.0
1	1						53	1904586	496	500	48	IS30_IS30	1904586	1905806.0	NC_000913.3_art_ISs	1904085.0	1904585.0		1905807.0	1906307.0	NC_000913.3	1840593.0				1841594.0	IS only present in query Strain.	1. DLIS	Complete IS hit.	b1757	molybdopterin synthase sulfurtransferase	b1759	5-hydroxy-CTP diphosphatase	b1757	molybdopterin synthase sulfurtransferase	b1759	5-hydroxy-CTP diphosphatase	4763752.0
1	1						54	1932848	497	500	49	IS30_IS30	1932848	1934068.0	NC_000913.3_art_ISs	1932347.0	1932847.0		1934069.0	1934569.0	NC_000913.3	1867634.0				1868635.0	IS only present in query Strain.	1. DLIS	Complete IS hit.	-	Intergenic/Pseudo/Repeaed Region	-	Intergenic/Pseudo/Repeaed Region	b1783	protein kinase YeaG	b1783	protein kinase YeaG	4763752.0
1	1						55	1937860	498	500	50	IS30_IS30	1937860	1939080.0	NC_000913.3_art_ISs	1937359.0	1937859.0		1939081.0	1939581.0	NC_000913.3	1871425.0				1872426.0	IS only present in query Strain.	1. DLIS	Complete IS hit.	b1785	putative c-di-GMP binding protein CdgI	b1786	putative diguanylate cyclase DgcJ	b1785	putative c-di-GMP binding protein CdgI	b1786	putative diguanylate cyclase DgcJ	4763752.0
1	1						56	2146825	499	500	51	IS30_IS30	2146825	2148045.0	NC_000913.3_art_ISs	2146324.0	2146824.0		2148046.0	2148546.0	NC_000913.3	2079169.0				2080170.0	IS only present in query Strain.	1. DLIS	Complete IS hit.	b2007	DUF496 domain-containing protein YeeX	-	Intergenic/Pseudo/Repeaed Region	b2007	DUF496 domain-containing protein YeeX	b2008	putative transporter YeeA	4763752.0
1	1						57	2291220	500	500	52	IS30_IS30	2291220	2292440.0	NC_000913.3_art_ISs	2290719.0	2291219.0		2292441.0	2292941.0	NC_000913.3	2222343.0				2223344.0	IS only present in query Strain.	1. DLIS	Complete IS hit.	-	Intergenic/Pseudo/Repeaed Region	-	Intergenic/Pseudo/Repeaed Region	b2133	D-lactate dehydrogenase	b2133	D-lactate dehydrogenase	4763752.0
1	1						58	2302324	501	500	53	IS30_IS30	2302324	2303544.0	NC_000913.3_art_ISs	2301823.0	2302323.0		2303545.0	2304045.0	NC_000913.3	2232226.0				2233227.0	IS only present in query Strain.	1. DLIS	Complete IS hit.	-	Intergenic/Pseudo/Repeaed Region	b2144	DUF218 domain-containing protein SanA	b2143	cytidine/deoxycytidine deaminase	b2144	DUF218 domain-containing protein SanA	4763752.0
1	1						59	2305151	502	500	54	IS30_IS30	2305151	2306371.0	NC_000913.3_art_ISs	2304650.0	2305150.0		2306372.0	2306872.0	NC_000913.3	2233832.0				2234833.0	IS only present in query Strain.	1. DLIS	Complete IS hit.	b2145	DUF2542 domain-containing protein YeiS	-	Intergenic/Pseudo/Repeaed Region	b2145	DUF2542 domain-containing protein YeiS	b2146	NAD-dependent dihydropyrimidine dehydrogenase subunit PreT	4763752.0
	1			1			60	2314302	503	500	97	IS30_IS30	2314302	2315125.0	NC_000913.3_art_ISs	2313801.0	2314301.0		2315126.0	2315626.0							IS only present in query Strain.	2. Verify manually, possible false positive caused by consecutive ISs.	Partial IS hit.	-	Intergenic/Pseudo/Repeaed Region	-	Intergenic/Pseudo/Repeaed Region	-	-	-	-	4763752.0
	1			1			61	2315125	504	500	98	IS30_IS30	2315125	2315756.0	NC_000913.3_art_ISs	2314624.0	2315124.0		2315757.0	2316257.0							IS only present in query Strain.	2. Verify manually, possible false positive caused by consecutive ISs.	Partial IS hit.	-	Intergenic/Pseudo/Repeaed Region	-	Intergenic/Pseudo/Repeaed Region	-	-	-	-	4763752.0
	1			1			62	2315757	505	500	99	IS30_IS30	2315757	2316977.0	NC_000913.3_art_ISs	2315256.0	2315756.0		2316978.0	2317478.0	NC_000913.3	270672.0				271673.0	IS only present in query Strain.	2. Verify manually, possible false positive caused by consecutive ISs.	Complete IS hit.	-	Intergenic/Pseudo/Repeaed Region	-	Intergenic/Pseudo/Repeaed Region	b0256	IS30 transposase	b0256	IS30 transposase	4763752.0
1	1						63	2331004	506	500	55	IS30_IS30	2331004	2332224.0	NC_000913.3_art_ISs	2330503.0	2331003.0		2332225.0	2332725.0	NC_000913.3	2254801.0				2255802.0	IS only present in query Strain.	1. DLIS	Complete IS hit.	b2162	pyrimidine-specific ribonucleoside hydrolase RihB	b2163	putative DNA-binding transcriptional regulator YeiL	b2162	pyrimidine-specific ribonucleoside hydrolase RihB	b2163	putative DNA-binding transcriptional regulator YeiL	4763752.0
1	1						64	2338335	507	500	56	IS30_IS30	2338335	2339555.0	NC_000913.3_art_ISs	2337834.0	2338334.0		2339556.0	2340056.0	NC_000913.3	2260911.0				2261912.0	IS only present in query Strain.	1. DLIS	Complete IS hit.	b2167	fructose-specific PTS multiphosphoryl transfer protein FruA	b2168	1-phosphofructokinase	b2167	fructose-specific PTS multiphosphoryl transfer protein FruA	b2168	1-phosphofructokinase	4763752.0
1	1						65	2415048	508	500	57	IS30_IS30	2415048	2416268.0	NC_000913.3_art_ISs	2414547.0	2415047.0		2416269.0	2416769.0	NC_000913.3	2336403.0				2337404.0	IS only present in query Strain.	1. DLIS	Complete IS hit.	b2230	DUF2138 domain-containing protein YfaA	-	Intergenic/Pseudo/Repeaed Region	b2230	DUF2138 domain-containing protein YfaA	b2231	DNA gyrase subunit A	4763752.0
1	1						66	2462961	509	500	58	IS30_IS30	2462961	2464181.0	NC_000913.3_art_ISs	2462460.0	2462960.0		2464182.0	2464682.0	NC_000913.3	2383095.0				2384096.0	IS only present in query Strain.	1. DLIS	Complete IS hit.	-	Intergenic/Pseudo/Repeaed Region	b2270	IPR002035/DUF3520 domain-containing protein YfbK	b2269	protease ElaD	b2270	IPR002035/DUF3520 domain-containing protein YfbK	4763752.0
1	1						67	2528130	510	500	59	IS30_IS30	2528130	2529350.0	NC_000913.3_art_ISs	2527629.0	2528129.0		2529351.0	2529851.0	NC_000913.3	2447043.0				2448044.0	IS only present in query Strain.	1. DLIS	Complete IS hit.	b2329	chorismate synthase	-	Intergenic/Pseudo/Repeaed Region	b2329	chorismate synthase	b2330	50S ribosomal subunit protein L3 N(5)-glutamine methyltransferase	4763752.0
1	1						68	2951446	511	500	60	IS30_IS30	2951446	2952666.0	NC_000913.3_art_ISs	2950945.0	2951445.0		2952667.0	2953167.0	NC_000913.3	2869138.0				2870139.0	IS only present in query Strain.	1. DLIS	Complete IS hit.	b2743	L-isoaspartate protein carboxylmethyltransferase type II	-	Intergenic/Pseudo/Repeaed Region	b2743	L-isoaspartate protein carboxylmethyltransferase type II	b2744	broad specificity 5'(3')-nucleotidase and polyphosphatase	4763752.0
1	1						69	2954441	512	500	61	IS30_IS30	2954441	2955661.0	NC_000913.3_art_ISs	2953940.0	2954440.0		2955662.0	2956162.0	NC_000913.3	2870912.0				2871913.0	IS only present in query Strain.	1. DLIS	Complete IS hit.	b2745	tRNA pseudouridine(13) synthase	b2747	2-C-methyl-D-erythritol 4-phosphate cytidylyltransferase	b2745	tRNA pseudouridine(13) synthase	b2747	2-C-methyl-D-erythritol 4-phosphate cytidylyltransferase	4763752.0
1	1						70	2983613	513	500	62	IS30_IS30	2983613	2984833.0	NC_000913.3_art_ISs	2983112.0	2983612.0		2984834.0	2985334.0	NC_000913.3	2898863.0				2899864.0	IS only present in query Strain.	1. DLIS	Complete IS hit.	-	Intergenic/Pseudo/Repeaed Region	b2774	putative deoxygluconate dehydrogenase	b4463	putative FAD-containing dehydrogenase	b2774	putative deoxygluconate dehydrogenase	4763752.0
1	1						71	3057300	514	500	63	IS30_IS30	3057300	3058520.0	NC_000913.3_art_ISs	3056799.0	3057299.0		3058521.0	3059021.0	NC_000913.3	2971329.0				2972330.0	IS only present in query Strain.	1. DLIS	Complete IS hit.	b2833	DUF903 domain-containing lipoprotein YgdR	-	Intergenic/Pseudo/Repeaed Region	b2833	DUF903 domain-containing lipoprotein YgdR	b2834	putative NADP(H)-dependent aldo-keto reductase Tas	4763752.0
1	1						72	3104435	515	500	64	IS30_IS30	3104435	3105655.0	NC_000913.3_art_ISs	3103934.0	3104434.0		3105656.0	3106156.0	NC_000913.3	3017243.0				3018244.0	IS only present in query Strain.	1. DLIS	Complete IS hit.	-	Intergenic/Pseudo/Repeaed Region	-	Intergenic/Pseudo/Repeaed Region	b2878	putative oxidoreductase; Fe-S subunit	b2878	putative oxidoreductase; Fe-S subunit	4763752.0
1	1						73	3137784	516	500	65	IS30_IS30	3137784	3139004.0	NC_000913.3_art_ISs	3137283.0	3137783.0		3139005.0	3139505.0	NC_000913.3	3049371.0				3050372.0	IS only present in query Strain.	1. DLIS	Complete IS hit.	b2904	glycine cleavage system H protein	-	Intergenic/Pseudo/Repeaed Region	b2904	glycine cleavage system H protein	b2905	aminomethyltransferase	4763752.0
1	1						74	3161238	517	500	66	IS30_IS30	3161238	3162458.0	NC_000913.3_art_ISs	3160737.0	3161237.0		3162459.0	3162959.0	NC_000913.3	3071604.0				3072605.0	IS only present in query Strain.	1. DLIS	Complete IS hit.	-	Intergenic/Pseudo/Repeaed Region	-	Intergenic/Pseudo/Repeaed Region	b2926	phosphoglycerate kinase	b2926	phosphoglycerate kinase	4763752.0
1	1						75	3226249	518	500	67	IS30_IS30	3226249	3227469.0	NC_000913.3_art_ISs	3225748.0	3226248.0		3227470.0	3227970.0	NC_000913.3	3135394.0				3136395.0	IS only present in query Strain.	1. DLIS	Complete IS hit.	-	Intergenic/Pseudo/Repeaed Region	-	Intergenic/Pseudo/Repeaed Region	b2987	metal phosphate:H(+) symporter PitB	-	Intergenic/Pseudo/Repeaed Region	4763752.0
1	1						76	3361527	519	500	68	IS30_IS30	3361527	3362747.0	NC_000913.3_art_ISs	3361026.0	3361526.0		3362748.0	3363248.0	NC_000913.3	3269451.0				3270452.0	IS only present in query Strain.	1. DLIS	Complete IS hit.	b3121	uncharacterized protein YhaC	-	Intergenic/Pseudo/Repeaed Region	b3121	uncharacterized protein YhaC	-	Intergenic/Pseudo/Repeaed Region	4763752.0
1	1						77	3386688	520	500	69	IS30_IS30	3386688	3387908.0	NC_000913.3_art_ISs	3386187.0	3386687.0		3387909.0	3388409.0	NC_000913.3	3293391.0				3294392.0	IS only present in query Strain.	1. DLIS	Complete IS hit.	-	Intergenic/Pseudo/Repeaed Region	-	Intergenic/Pseudo/Repeaed Region	-	Intergenic/Pseudo/Repeaed Region	b3147	outer membrane lipoprotein - activator of MrcA activity	4763752.0
1	1						78	3441448	521	500	70	IS30_IS30	3441448	3442668.0	NC_000913.3_art_ISs	3440947.0	3441447.0		3442669.0	3443169.0	NC_000913.3	3346930.0				3347931.0	IS only present in query Strain.	1. DLIS	Complete IS hit.	b3204	phosphotransferase system enzyme IIA(Ntr)	-	Intergenic/Pseudo/Repeaed Region	b3204	phosphotransferase system enzyme IIA(Ntr)	b3205	RNase adaptor protein	4763752.0
1	1						79	3596382	522	500	71	IS30_IS30	3596382	3597602.0	NC_000913.3_art_ISs	3595881.0	3596381.0		3597603.0	3598103.0	NC_000913.3	3500643.0				3501644.0	IS only present in query Strain.	1. DLIS	Complete IS hit.	-	Intergenic/Pseudo/Repeaed Region	b3371	fructoselysine 6-phosphate deglycase	b3370	fructoselysine/psicoselysine transporter	b3371	fructoselysine 6-phosphate deglycase	4763752.0
1	1						80	3615538	523	500	72	IS30_IS30	3615538	3616758.0	NC_000913.3_art_ISs	3615037.0	3615537.0		3616759.0	3617259.0	NC_000913.3	3518578.0				3519579.0	IS only present in query Strain.	1. DLIS	Complete IS hit.	b3390	shikimate kinase 1	-	Intergenic/Pseudo/Repeaed Region	b3390	shikimate kinase 1	b3391	DNA utilization protein HofQ	4763752.0
1	1						81	3617769	524	500	73	IS30_IS30	3617769	3618989.0	NC_000913.3_art_ISs	3617268.0	3617768.0		3618990.0	3619490.0	NC_000913.3	3519588.0				3520589.0	IS only present in query Strain.	1. DLIS	Complete IS hit.	-	Intergenic/Pseudo/Repeaed Region	-	Intergenic/Pseudo/Repeaed Region	b3391	DNA utilization protein HofQ	b3391	DNA utilization protein HofQ	4763752.0
1	1						82	3654946	525	500	74	IS30_IS30	3654946	3656166.0	NC_000913.3_art_ISs	3654445.0	3654945.0		3656167.0	3656667.0	NC_000913.3	3555544.0				3556545.0	IS only present in query Strain.	1. DLIS	Complete IS hit.	b3418	DNA-binding transcriptional activator MalT	-	Intergenic/Pseudo/Repeaed Region	b3418	DNA-binding transcriptional activator MalT	b4475	RNA 3'-terminal phosphate cyclase	4763752.0
1	1						83	3658126	526	500	75	IS30_IS30	3658126	3659346.0	NC_000913.3_art_ISs	3657625.0	3658125.0		3659347.0	3659847.0	NC_000913.3	3557503.0				3558504.0	IS only present in query Strain.	1. DLIS	Complete IS hit.	-	Intergenic/Pseudo/Repeaed Region	b3422	DNA-binding transcriptional activator RtcR	b3421	RNA-splicing ligase	b3422	DNA-binding transcriptional activator RtcR	4763752.0
1	1						84	3727323	527	500	76	IS30_IS30	3727323	3728543.0	NC_000913.3_art_ISs	3726822.0	3727322.0		3728544.0	3729044.0	NC_000913.3	3625479.0				3626480.0	IS only present in query Strain.	1. DLIS	Complete IS hit.	b3484	putative transposase	-	Intergenic/Pseudo/Repeaed Region	b3484	putative transposase	b3485	ABC transporter family protein YhhJ	4763752.0
1	1						85	3766127	528	500	77	IS30_IS30	3766127	3767347.0	NC_000913.3_art_ISs	3765626.0	3766126.0		3767348.0	3767848.0	NC_000913.3	3663062.0				3664063.0	IS only present in query Strain.	1. DLIS	Complete IS hit.	b3514	multidrug efflux pump RND permease MdtF	b3515	DNA-binding transcriptional dual regulator GadW	b3514	multidrug efflux pump RND permease MdtF	b3515	DNA-binding transcriptional dual regulator GadW	4763752.0
1	1						86	3798695	529	500	78	IS30_IS30	3798695	3799915.0	NC_000913.3_art_ISs	3798194.0	3798694.0		3799916.0	3800416.0	NC_000913.3	3694409.0				3695410.0	IS only present in query Strain.	1. DLIS	Complete IS hit.	-	Intergenic/Pseudo/Repeaed Region	b3534	cellulose biosynthesis protein	b3533	cellulose synthase catalytic subunit	b3534	cellulose biosynthesis protein	4763752.0
1	1						87	3900620	530	500	79	IS30_IS30	3900620	3901840.0	NC_000913.3_art_ISs	3900119.0	3900619.0		3901841.0	3902341.0	NC_000913.3	3795113.0				3796114.0	IS only present in query Strain.	1. DLIS	Complete IS hit.	-	Intergenic/Pseudo/Repeaed Region	b3621	ADP-heptose:LPS heptosyltransferase 1	b3620	ADP-heptose--LPS heptosyltransferase 2	b3621	ADP-heptose:LPS heptosyltransferase 1	4763752.0
1	1						88	4006509	531	500	80	IS30_IS30	4006509	4007729.0	NC_000913.3_art_ISs	4006008.0	4006508.0		4007730.0	4008230.0	NC_000913.3	3899781.0				3900782.0	IS only present in query Strain.	1. DLIS	Complete IS hit.	-	Intergenic/Pseudo/Repeaed Region	b3720	carbohydrate-specific outer membrane porin; cryptic	b3719	putative hydrolase YieL	b3720	carbohydrate-specific outer membrane porin; cryptic	4763752.0
1	1						89	4013286	532	500	81	IS30_IS30	4013286	4014506.0	NC_000913.3_art_ISs	4012785.0	4013285.0		4014507.0	4015007.0	NC_000913.3	3905337.0				3906338.0	IS only present in query Strain.	1. DLIS	Complete IS hit.	b3722	beta-glucoside specific PTS enzyme II/BglG kinase/BglG phosphatase	-	Intergenic/Pseudo/Repeaed Region	b3722	beta-glucoside specific PTS enzyme II/BglG kinase/BglG phosphatase	b3723	transcriptional antiterminator BglG	4763752.0
1	1						90	4027534	533	500	82	IS30_IS30	4027534	4028754.0	NC_000913.3_art_ISs	4027033.0	4027533.0		4028755.0	4029255.0	NC_000913.3	3918364.0				3919365.0	IS only present in query Strain.	1. DLIS	Complete IS hit.	-	Intergenic/Pseudo/Repeaed Region	-	Intergenic/Pseudo/Repeaed Region	b3734	ATP synthase F1 complex subunit alpha	b3734	ATP synthase F1 complex subunit alpha	4763752.0
1	1						91	4248889	534	500	83	IS30_IS30	4248889	4250109.0	NC_000913.3_art_ISs	4248388.0	4248888.0		4250110.0	4250610.0	NC_000913.3	4138498.0				4139499.0	IS only present in query Strain.	1. DLIS	Complete IS hit.	-	Intergenic/Pseudo/Repeaed Region	b3946	fructose-6-phosphate aldolase 2	b3945	L-1;2-propanediol dehydrogenase/glycerol dehydrogenase	b3946	fructose-6-phosphate aldolase 2	4763752.0
1	1						92	4260696	535	500	84	IS30_IS30	4260696	4261916.0	NC_000913.3_art_ISs	4260195.0	4260695.0		4261917.0	4262417.0	NC_000913.3	4149084.0				4150085.0	IS only present in query Strain.	1. DLIS	Complete IS hit.	-	Intergenic/Pseudo/Repeaed Region	-	Intergenic/Pseudo/Repeaed Region	b3955	phosphoethanolamine transferase EptC	b3955	phosphoethanolamine transferase EptC	4763752.0
1	1						93	4264502	536	500	85	IS30_IS30	4264502	4265722.0	NC_000913.3_art_ISs	4264001.0	4264501.0		4265723.0	4266223.0	NC_000913.3	4151669.0				4152670.0	IS only present in query Strain.	1. DLIS	Complete IS hit.	-	Intergenic/Pseudo/Repeaed Region	-	Intergenic/Pseudo/Repeaed Region	b3956	phosphoenolpyruvate carboxylase	b3956	phosphoenolpyruvate carboxylase	4763752.0
1	1						94	4311821	537	500	86	IS30_IS30	4311821	4313041.0	NC_000913.3_art_ISs	4311320.0	4311820.0		4313042.0	4313542.0	NC_000913.3	4197767.0				4198768.0	IS only present in query Strain.	1. DLIS	Complete IS hit.	-	Intergenic/Pseudo/Repeaed Region	-	Intergenic/Pseudo/Repeaed Region	b3997	uroporphyrinogen decarboxylase	b3997	uroporphyrinogen decarboxylase	4763752.0
1	1						95	4389275	538	500	87	IS30_IS30	4389275	4390495.0	NC_000913.3_art_ISs	4388774.0	4389274.0		4390496.0	4390996.0	NC_000913.3	4274000.0				4275001.0	IS only present in query Strain.	1. DLIS	Complete IS hit.	-	Intergenic/Pseudo/Repeaed Region	b4060	uncharacterized protein YjcB	-	Intergenic/Pseudo/Repeaed Region	b4060	uncharacterized protein YjcB	4763752.0
1	1						96	4434397	539	500	88	IS30_IS30	4434397	4435617.0	NC_000913.3_art_ISs	4433896.0	4434396.0		4435618.0	4436118.0	NC_000913.3	4317901.0				4318902.0	IS only present in query Strain.	1. DLIS	Complete IS hit.	-	Intergenic/Pseudo/Repeaed Region	b4098	carbon-phosphorus lyase core complex subunit PhnJ	-	Intergenic/Pseudo/Repeaed Region	b4098	carbon-phosphorus lyase core complex subunit PhnJ	4763752.0
	1			1			97	4461112	540	500	102	IS30_IS30	4461112	4461482.0	NC_000913.3_art_ISs	4460611.0	4461111.0		4461483.0	4461983.0							IS only present in query Strain.	2. Verify manually, possible false positive caused by consecutive ISs.	Partial IS hit.	-	Intergenic/Pseudo/Repeaed Region	-	Intergenic/Pseudo/Repeaed Region	-	-	-	-	4763752.0
	1			1			98	4461481	541	500	103	IS30_IS30	4461481	4462701.0	NC_000913.3_art_ISs	4460980.0	4461480.0		4462702.0	4463202.0							IS only present in query Strain.	2. Verify manually, possible false positive caused by consecutive ISs.		-	Intergenic/Pseudo/Repeaed Region	-	Intergenic/Pseudo/Repeaed Region	-	-	-	-	4763752.0
1	1						99	4509587	542	500	89	IS30_IS30	4509587	4510807.0	NC_000913.3_art_ISs	4509086.0	4509586.0		4510808.0	4511308.0	NC_000913.3	4389428.0				4390429.0	IS only present in query Strain.	1. DLIS	Complete IS hit.	-	Intergenic/Pseudo/Repeaed Region	-	Intergenic/Pseudo/Repeaed Region	b4160	phosphatidylserine decarboxylase proenzyme	-	Intergenic/Pseudo/Repeaed Region	4763752.0
1	1						100	4524761	543	500	90	IS30_IS30	4524761	4525981.0	NC_000913.3_art_ISs	4524260.0	4524760.0		4525982.0	4526482.0	NC_000913.3	4403381.0				4404382.0	IS only present in query Strain.	1. DLIS	Complete IS hit.	-	Intergenic/Pseudo/Repeaed Region	-	Intergenic/Pseudo/Repeaed Region	b4175	regulator of FtsH protease	-	Intergenic/Pseudo/Repeaed Region	4763752.0
			1						544	500	92	IS30_IS30	249701	250822.0	NC_000913.3_art_ISs	249200.0	249700.0		250823.0	251323.0							IS only present in query Strain.	2. Verify manually, possible false positive caused by consecutive ISs.	Partial IS hit.	-	Intergenic/Pseudo/Repeaed Region	-	Intergenic/Pseudo/Repeaed Region	-	-	-	-	4763752.0
			1						545	500	93	ISEc1_ISAs1	736682	737971.0	NC_000913.3_art_ISs	763043.0				764067.0	NC_000913.3	736181.0	736681.0		737972.0	738472.0	IS only present in ref Strain.	2. Verify manually, possible false positive caused by consecutive ISs.	Complete IS hit.	b0704	uncharacterized protein YbfC	b0705	putative transposase YbfL	b0681	chitobiose outer membrane channel	b0684	flavodoxin 1	4641652.0
			1						546	500	94	ISEc1_ISAs1	763544	764833.0	NC_000913.3_art_ISs	763043.0	763543.0		764834.0	765334.0	NC_000913.3	736181.0				737205.0	IS only present in query Strain.	2. Verify manually, possible false positive caused by consecutive ISs.	Complete IS hit.	b0704	uncharacterized protein YbfC	b0706	H repeat-associated putative transposase YbfD	b0704	uncharacterized protein YbfC	b0705	putative transposase YbfL	4763752.0
			1						547	500	100	IS30_IS30	2316971	2317566.0	NC_000913.3_art_ISs	2316470.0	2316970.0		2317567.0	2318067.0							IS only present in query Strain.	2. Verify manually, possible false positive caused by consecutive ISs.	Partial IS hit.	-	Intergenic/Pseudo/Repeaed Region	-	Intergenic/Pseudo/Repeaed Region	-	-	-	-	4763752.0
			1						548	500	101	IS30_IS30	2317567	2317964.0	NC_000913.3_art_ISs	2317066.0	2317566.0		2317965.0	2318465.0							IS only present in query Strain.	2. Verify manually, possible false positive caused by consecutive ISs.	Partial IS hit.	-	Intergenic/Pseudo/Repeaed Region	-	Intergenic/Pseudo/Repeaed Region	-	-	-	-	4763752.0
			1						549	500	104	IS30_IS30	4462702	4463553.0	NC_000913.3_art_ISs	4462201.0	4462701.0		4463554.0	4464054.0							IS only present in query Strain.	2. Verify manually, possible false positive caused by consecutive ISs.	Partial IS hit.	-	Intergenic/Pseudo/Repeaed Region	-	Intergenic/Pseudo/Repeaed Region	-	-	-	-	4763752.0
			1						550	500	105	IS2_IS2_IS3	399833	400905.0	NC_000913.3_art_ISs	399332.0	399832.0		400906.0	401406.0							IS only present in query Strain.	5. Discarded for analysis. There were multiple blastn hits, and left and right pairs could not be determined.	Partial IS hit.	-	Intergenic/Pseudo/Repeaed Region	b0363	putative glucosyltransferase	-	-	-	-	4763752.0
91	99	0	7	9	1	*			551	500
1	1						1	446	552	600	0	IS30_IS30	446	1666.0	NC_000913.3_art_ISs	1.0	445.0		1667.0	2267.0	NC_000913.3	1.0				1046.0	IS only present in query Strain.	1. DLIS	Complete IS hit.	-	Intergenic/Pseudo/Repeaed Region	-	Intergenic/Pseudo/Repeaed Region	-	Intergenic/Pseudo/Repeaed Region	b0002	fused aspartate kinase/homoserine dehydrogenase 1	4763752.0
1	1						2	3160	553	600	1	IS30_IS30	3160	4380.0	NC_000913.3_art_ISs	2559.0	3159.0		4381.0	4981.0	NC_000913.3	1338.0				2539.0	IS only present in query Strain.	1. DLIS	Complete IS hit.	-	Intergenic/Pseudo/Repeaed Region	-	Intergenic/Pseudo/Repeaed Region	b0002	fused aspartate kinase/homoserine dehydrogenase 1	b0002	fused aspartate kinase/homoserine dehydrogenase 1	4763752.0
1	1						3	123711	554	600	2	IS30_IS30	123711	124931.0	NC_000913.3_art_ISs	123110.0	123710.0		124932.0	125532.0	NC_000913.3	120668.0				121869.0	IS only present in query Strain.	1. DLIS	Complete IS hit.	-	Intergenic/Pseudo/Repeaed Region	-	Intergenic/Pseudo/Repeaed Region	b0112	aromatic amino acid:H(+) symporter AroP	-	Intergenic/Pseudo/Repeaed Region	4763752.0
1	1						4	142989	555	600	3	IS30_IS30	142989	144209.0	NC_000913.3_art_ISs	142388.0	142988.0		144210.0	144810.0	NC_000913.3	138725.0				139926.0	IS only present in query Strain.	1. DLIS	Complete IS hit.	-	Intergenic/Pseudo/Repeaed Region	-	Intergenic/Pseudo/Repeaed Region	-	Intergenic/Pseudo/Repeaed Region	b0124	quinoprotein glucose dehydrogenase	4763752.0
1	1						5	163498	556	600	4	IS30_IS30	163498	164718.0	NC_000913.3_art_ISs	162897.0	163497.0		164719.0	165319.0	NC_000913.3	158013.0				159214.0	IS only present in query Strain.	1. DLIS	Complete IS hit.	-	Intergenic/Pseudo/Repeaed Region	b0144	glutamyl-Q tRNA(Asp) synthetase	b0143	poly(A) polymerase I	b0144	glutamyl-Q tRNA(Asp) synthetase	4763752.0
1	1						6	240046	557	600	5	IS30_IS30	240046	241266.0	NC_000913.3_art_ISs	239445.0	240045.0		241267.0	241867.0	NC_000913.3	233340.0				234541.0	IS only present in query Strain.	1. DLIS	Complete IS hit.	-	Intergenic/Pseudo/Repeaed Region	b0212	hydroxyacylglutathione hydrolase GloB	b0211	membrane-bound lytic murein transglycosylase D	b0212	hydroxyacylglutathione hydrolase GloB	4763752.0
				1	1		7	248381	558	600
	1			1			8	248480	559	600	89	IS30_IS30	248480	249700.0	NC_000913.3_art_ISs	247879.0	248479.0		249701.0	250301.0							IS only present in query Strain.	2. Verify manually, possible false positive caused by consecutive ISs.		b0220	periplasmic chaperone; inhibitor of vertebrate C-type lysozyme	-	Intergenic/Pseudo/Repeaed Region	-	-	-	-	4763752.0
1	1						9	310515	560	600	6	IS30_IS30	310515	311735.0	NC_000913.3_art_ISs	309914.0	310514.0		311736.0	312336.0	NC_000913.3	300146.0				301347.0	IS only present in query Strain.	1. DLIS	Complete IS hit.	-	Intergenic/Pseudo/Repeaed Region	b0285	aldehyde dehydrogenase; FAD-binding subunit	b0284	aldehyde dehydrogenase: molybdenum cofactor-binding subunit	b0285	aldehyde dehydrogenase; FAD-binding subunit	4763752.0
1	1						10	315801	561	600	7	IS30_IS30	315801	317021.0	NC_000913.3_art_ISs	315200.0	315800.0		317022.0	317622.0	NC_000913.3	304211.0				305412.0	IS only present in query Strain.	1. DLIS	Complete IS hit.	-	Intergenic/Pseudo/Repeaed Region	b0290	fimbrial adhesin EcpD	-	Intergenic/Pseudo/Repeaed Region	b0290	fimbrial adhesin EcpD	4763752.0
1	1						11	333734	562	600	8	IS30_IS30	333734	334954.0	NC_000913.3_art_ISs	333133.0	333733.0		334955.0	335555.0	NC_000913.3	320923.0				322124.0	IS only present in query Strain.	1. DLIS	Complete IS hit.	b0305	DNA-binding transcriptional activator RclR	b0306	putative lactate utilization oxidoreductase YkgE	b0305	DNA-binding transcriptional activator RclR	b0306	putative lactate utilization oxidoreductase YkgE	4763752.0
1	1						12	356194	563	600	9	IS30_IS30	356194	357414.0	NC_000913.3_art_ISs	355593.0	356193.0		357415.0	358015.0	NC_000913.3	342162.0				343363.0	IS only present in query Strain.	1. DLIS	Complete IS hit.	b0324	putative deaminase with metallo-dependent hydrolase domain	b0325	aldehyde reductase; NADPH-dependent	b0324	putative deaminase with metallo-dependent hydrolase domain	b0325	aldehyde reductase; NADPH-dependent	4763752.0
1	1						13	361260	564	600	10	IS30_IS30	361260	362480.0	NC_000913.3_art_ISs	360659.0	361259.0		362481.0	363081.0	NC_000913.3	346007.0				347208.0	IS only present in query Strain.	1. DLIS	Complete IS hit.	b0328	putative amino acid exporter	b0330	DNA-binding transcriptional dual regulator PrpR	b0328	putative amino acid exporter	b0330	DNA-binding transcriptional dual regulator PrpR	4763752.0
1	1						14	395877	565	600	11	IS30_IS30	395877	397097.0	NC_000913.3_art_ISs	395276.0	395876.0		397098.0	397698.0	NC_000913.3	379403.0				380604.0	IS only present in query Strain.	1. DLIS	Complete IS hit.	b0356	S-(hydroxymethyl)glutathione dehydrogenase	b0358	outer membrane protein YaiO	b0356	S-(hydroxymethyl)glutathione dehydrogenase	b0358	outer membrane protein YaiO	4763752.0
1	1						15	398612	566	600	12	IS30_IS30	398612	399832.0	NC_000913.3_art_ISs	398011.0	398611.0		399833.0	400433.0	NC_000913.3	380917.0				382118.0	IS only present in query Strain.	1. DLIS	Complete IS hit.	-	Intergenic/Pseudo/Repeaed Region	b0361	IS2 element protein	b4579	putative acyltransferase; N-terminal fragment	b0361	IS2 element protein	4763752.0
1	1						16	458588	567	600	13	IS30_IS30	458588	459808.0	NC_000913.3_art_ISs	457987.0	458587.0		459809.0	460409.0	NC_000913.3	439672.0				440873.0	IS only present in query Strain.	1. DLIS	Complete IS hit.	b0420	1-deoxy-D-xylulose-5-phosphate synthase	-	Intergenic/Pseudo/Repeaed Region	b0420	1-deoxy-D-xylulose-5-phosphate synthase	b0421	geranyl diphosphate/farnesyl diphosphate synthase	4763752.0
1	1						17	515332	568	600	14	IS30_IS30	515332	516552.0	NC_000913.3_art_ISs	514731.0	515331.0		516553.0	517153.0	NC_000913.3	495195.0				496396.0	IS only present in query Strain.	1. DLIS	Complete IS hit.	-	Intergenic/Pseudo/Repeaed Region	-	Intergenic/Pseudo/Repeaed Region	b0473	chaperone protein HtpG	b0473	chaperone protein HtpG	4763752.0
1	1						18	518331	569	600	15	IS30_IS30	518331	519551.0	NC_000913.3_art_ISs	517730.0	518330.0		519552.0	520152.0	NC_000913.3	496973.0				498174.0	IS only present in query Strain.	1. DLIS	Complete IS hit.	-	Intergenic/Pseudo/Repeaed Region	b0475	ferrochelatase	b0473	chaperone protein HtpG	b0475	ferrochelatase	4763752.0
1	1						19	564278	570	600	16	IS30_IS30	564278	565498.0	NC_000913.3_art_ISs	563677.0	564277.0		565499.0	566099.0	NC_000913.3	541699.0				542900.0	IS only present in query Strain.	1. DLIS	Complete IS hit.	b0513	putative purine transporter	-	Intergenic/Pseudo/Repeaed Region	b0513	putative purine transporter	b0514	glycerate 2-kinase 2	4763752.0
1	1						20	638410	571	600	17	IS30_IS30	638410	639630.0	NC_000913.3_art_ISs	637809.0	638409.0		639631.0	640231.0	NC_000913.3	614610.0				615811.0	IS only present in query Strain.	1. DLIS	Complete IS hit.	-	Intergenic/Pseudo/Repeaed Region	-	Intergenic/Pseudo/Repeaed Region	b0586	apo-serine activating enzyme	b0586	apo-serine activating enzyme	4763752.0
1	1						21	643571	572	600	18	IS30_IS30	643571	644791.0	NC_000913.3_art_ISs	642970.0	643570.0		644792.0	645392.0	NC_000913.3	618550.0				619751.0	IS only present in query Strain.	1. DLIS	Complete IS hit.	-	Intergenic/Pseudo/Repeaed Region	b0588	ferric enterobactin ABC transporter ATP binding subunit	b0587	polysaccharide co-polymerase family protein FepE	b0588	ferric enterobactin ABC transporter ATP binding subunit	4763752.0
1	1						22	709250	573	600	19	IS30_IS30	709250	710470.0	NC_000913.3_art_ISs	708649.0	709249.0		710471.0	711071.0	NC_000913.3	683008.0				684209.0	IS only present in query Strain.	1. DLIS	Complete IS hit.	b0650	chaperone protein HscC	-	Intergenic/Pseudo/Repeaed Region	b0650	chaperone protein HscC	b0651	pyrimidine-specific ribonucleoside hydrolase RihA	4763752.0
1	1						23	780879	574	600	20	IS30_IS30	780879	782099.0	NC_000913.3_art_ISs	780278.0	780878.0		782100.0	782700.0	NC_000913.3	753416.0				754617.0	IS only present in query Strain.	1. DLIS	Complete IS hit.	-	Intergenic/Pseudo/Repeaed Region	-	Intergenic/Pseudo/Repeaed Region	b0720	citrate synthase	-	Intergenic/Pseudo/Repeaed Region	4763752.0
1	1						24	794533	575	600	21	IS30_IS30	794533	795753.0	NC_000913.3_art_ISs	793932.0	794532.0		795754.0	796354.0	NC_000913.3	765849.0				767050.0	IS only present in query Strain.	1. DLIS	Complete IS hit.	b0730	DNA-binding transcriptional repressor MngR	-	Intergenic/Pseudo/Repeaed Region	b0730	DNA-binding transcriptional repressor MngR	b0731	2-O-alpha-mannosyl-D-glycerate specific PTS enzyme II	4763752.0
1	1						25	818746	576	600	22	IS30_IS30	818746	819966.0	NC_000913.3_art_ISs	818145.0	818745.0		819967.0	820567.0	NC_000913.3	788841.0				790042.0	IS only present in query Strain.	1. DLIS	Complete IS hit.	-	Intergenic/Pseudo/Repeaed Region	b0758	galactose-1-phosphate uridylyltransferase	b0757	galactokinase	b0758	galactose-1-phosphate uridylyltransferase	4763752.0
1	1						26	827842	577	600	23	IS30_IS30	827842	829062.0	NC_000913.3_art_ISs	827241.0	827841.0		829063.0	829663.0	NC_000913.3	796716.0				797917.0	IS only present in query Strain.	1. DLIS	Complete IS hit.	-	Intergenic/Pseudo/Repeaed Region	b0766	pyridoxal phosphate/fructose-1;6-bisphosphate phosphatase	b0765	molybdate ABC transporter ATP binding subunit	b0766	pyridoxal phosphate/fructose-1;6-bisphosphate phosphatase	4763752.0
1	1						27	840349	578	600	24	IS30_IS30	840349	841569.0	NC_000913.3_art_ISs	839748.0	840348.0		841570.0	842170.0	NC_000913.3	808002.0				809203.0	IS only present in query Strain.	1. DLIS	Complete IS hit.	-	Intergenic/Pseudo/Repeaed Region	-	Intergenic/Pseudo/Repeaed Region	b0774	adenosylmethionine-8-amino-7-oxononanoate aminotransferase	b0774	adenosylmethionine-8-amino-7-oxononanoate aminotransferase	4763752.0
1	1						28	866245	579	600	25	IS30_IS30	866245	867465.0	NC_000913.3_art_ISs	865644.0	866244.0		867466.0	868066.0	NC_000913.3	832677.0				833878.0	IS only present in query Strain.	1. DLIS	Complete IS hit.	b0798	N-glycosidase YbiA	-	Intergenic/Pseudo/Repeaed Region	b0798	N-glycosidase YbiA	b0799	ATP-dependent DNA helicase DinG	4763752.0
1	1						29	885800	580	600	26	IS30_IS30	885800	887020.0	NC_000913.3_art_ISs	885199.0	885799.0		887021.0	887621.0	NC_000913.3	851011.0				852212.0	IS only present in query Strain.	1. DLIS	Complete IS hit.	-	Intergenic/Pseudo/Repeaed Region	-	Intergenic/Pseudo/Repeaed Region	-	Intergenic/Pseudo/Repeaed Region	b0815	phosphoethanolamine transferase	4763752.0
1	1						30	1054897	581	600	27	IS30_IS30	1054897	1056117.0	NC_000913.3_art_ISs	1054296.0	1054896.0		1056118.0	1056718.0	NC_000913.3	1018887.0				1020088.0	IS only present in query Strain.	1. DLIS	Complete IS hit.	b0956	macrodomain Ter protein	-	Intergenic/Pseudo/Repeaed Region	b0956	macrodomain Ter protein	-	Intergenic/Pseudo/Repeaed Region	4763752.0
1	1						31	1102873	582	600	28	IS30_IS30	1102873	1104093.0	NC_000913.3_art_ISs	1102272.0	1102872.0		1104094.0	1104694.0	NC_000913.3	1065642.0				1066843.0	IS only present in query Strain.	1. DLIS	Complete IS hit.	-	Intergenic/Pseudo/Repeaed Region	-	Intergenic/Pseudo/Repeaed Region	b1002	glucose-1-phosphatase	-	Intergenic/Pseudo/Repeaed Region	4763752.0
1	1						32	1118119	583	600	29	IS30_IS30	1118119	1119339.0	NC_000913.3_art_ISs	1117518.0	1118118.0		1119340.0	1119940.0	NC_000913.3	1079667.0				1080868.0	IS only present in query Strain.	1. DLIS	Complete IS hit.	-	Intergenic/Pseudo/Repeaed Region	-	Intergenic/Pseudo/Repeaed Region	b1015	proline:Na(+) symporter	-	Intergenic/Pseudo/Repeaed Region	4763752.0
1	1						33	1150109	584	600	30	IS30_IS30	1150109	1151329.0	NC_000913.3_art_ISs	1149508.0	1150108.0		1151330.0	1151930.0	NC_000913.3	1110436.0				1111637.0	IS only present in query Strain.	1. DLIS	Complete IS hit.	b1048	osmoregulated periplasmic glucans (OPGs) biosynthesis protein G	-	Intergenic/Pseudo/Repeaed Region	b1048	osmoregulated periplasmic glucans (OPGs) biosynthesis protein G	b1049	osmoregulated periplasmic glucans (OPGs) biosynthesis protein H	4763752.0
1	1						34	1165669	585	600	31	IS30_IS30	1165669	1166889.0	NC_000913.3_art_ISs	1165068.0	1165668.0		1166890.0	1167490.0	NC_000913.3	1124775.0				1125976.0	IS only present in query Strain.	1. DLIS	Complete IS hit.	b1065	multidrug efflux pump MdtH	b1066	ribosomal-protein-S5-alanine N-acetyltransferase	b1065	multidrug efflux pump MdtH	b1066	ribosomal-protein-S5-alanine N-acetyltransferase	4763752.0
1	1						35	1252656	586	600	32	IS30_IS30	1252656	1253876.0	NC_000913.3_art_ISs	1252055.0	1252655.0		1253877.0	1254477.0	NC_000913.3	1210541.0				1211742.0	IS only present in query Strain.	1. DLIS	Complete IS hit.	-	Intergenic/Pseudo/Repeaed Region	b1160	anti-adaptor protein IraM; inhibitor of sigma(S) proteolysis	b1159	e14 prophage; 5-methylcytosine-specific restriction enzyme McrA	b1160	anti-adaptor protein IraM; inhibitor of sigma(S) proteolysis	4763752.0
1	1						36	1314729	587	600	33	IS30_IS30	1314729	1315949.0	NC_000913.3_art_ISs	1314128.0	1314728.0		1315950.0	1316550.0	NC_000913.3	1271393.0				1272594.0	IS only present in query Strain.	1. DLIS	Complete IS hit.	b1216	Na(+)/K(+):H(+) antiporter ChaA	-	Intergenic/Pseudo/Repeaed Region	b1216	Na(+)/K(+):H(+) antiporter ChaA	b1218	glutathione-specific gamma-glutamylcyclotransferase	4763752.0
1	1						37	1316873	588	600	34	IS30_IS30	1316873	1318093.0	NC_000913.3_art_ISs	1316272.0	1316872.0		1318094.0	1318694.0	NC_000913.3	1272316.0				1273517.0	IS only present in query Strain.	1. DLIS	Complete IS hit.	b1217	putative cation transport regulator ChaB	b1219	DsrE/F sulfur relay family protein YchN	b1217	putative cation transport regulator ChaB	b1219	DsrE/F sulfur relay family protein YchN	4763752.0
1	1						38	1332696	589	600	35	IS30_IS30	1332696	1333916.0	NC_000913.3_art_ISs	1332095.0	1332695.0		1333917.0	1334517.0	NC_000913.3	1286918.0				1288119.0	IS only present in query Strain.	1. DLIS	Complete IS hit.	b1228	putative uncharacterized protein YchS	b1232	formyltetrahydrofolate deformylase	b1228	putative uncharacterized protein YchS	b1232	formyltetrahydrofolate deformylase	4763752.0
1	1						39	1477755	590	600	36	IS30_IS30	1477755	1478975.0	NC_000913.3_art_ISs	1477154.0	1477754.0		1478976.0	1479576.0	NC_000913.3	1430756.0				1431957.0	IS only present in query Strain.	1. DLIS	Complete IS hit.	-	Intergenic/Pseudo/Repeaed Region	-	Intergenic/Pseudo/Repeaed Region	b1372	Rac prophage; putative membrane protein	b1372	Rac prophage; putative membrane protein	4763752.0
1	1						40	1530090	591	600	37	IS30_IS30	1530090	1531310.0	NC_000913.3_art_ISs	1529489.0	1530089.0		1531311.0	1531911.0	NC_000913.3	1481870.0				1483071.0	IS only present in query Strain.	1. DLIS	Complete IS hit.	b1411	putative phosphatase	b1413	ATP-dependent RNA helicase HrpA	b1411	putative phosphatase	b1413	ATP-dependent RNA helicase HrpA	4763752.0
	1			1			41	1599338	592	600	93	IS30_IS30	1599338	1600558.0	NC_000913.3_art_ISs	1598737.0	1599337.0		1600559.0	1601159.0							IS only present in query Strain.	2. Verify manually, possible false positive caused by consecutive ISs.		b1474	formate dehydrogenase N subunit alpha	-	Intergenic/Pseudo/Repeaed Region	-	-	-	-	4763752.0
	1			1			42	1601001	593	600	94	IS30_IS30	1601001	1602221.0	NC_000913.3_art_ISs	1600400.0	1601000.0		1602222.0	1602822.0	NC_000913.3	1470358.0	1470517.0				IS only present in query Strain.	2. Verify manually, possible false positive caused by consecutive ISs.		-	Intergenic/Pseudo/Repeaed Region	b1476	formate dehydrogenase N subunit gamma	b1404	IS30 transposase	-	-	4763752.0
1	1						43	1614176	594	600	38	IS30_IS30	1614176	1615396.0	NC_000913.3_art_ISs	1613575.0	1614175.0		1615397.0	1615997.0	NC_000913.3	1562293.0				1563494.0	IS only present in query Strain.	1. DLIS	Complete IS hit.	b1487	putative D;D-dipeptide ABC transporter periplasmic binding protein	b1489	oxygen-sensing c-di-GMP phosphodiesterase DosP	b1487	putative D;D-dipeptide ABC transporter periplasmic binding protein	b1489	oxygen-sensing c-di-GMP phosphodiesterase DosP	4763752.0
1	1						44	1700984	595	600	39	IS30_IS30	1700984	1702204.0	NC_000913.3_art_ISs	1700383.0	1700983.0		1702205.0	1702805.0	NC_000913.3	1647880.0				1649081.0	IS only present in query Strain.	1. DLIS	Complete IS hit.	-	Intergenic/Pseudo/Repeaed Region	-	Intergenic/Pseudo/Repeaed Region	-	Intergenic/Pseudo/Repeaed Region	-	Intergenic/Pseudo/Repeaed Region	4763752.0
1	1						45	1724977	596	600	40	IS30_IS30	1724977	1726197.0	NC_000913.3_art_ISs	1724376.0	1724976.0		1726198.0	1726798.0	NC_000913.3	1670652.0				1671853.0	IS only present in query Strain.	1. DLIS	Complete IS hit.	b1596	putative transporter YnfM	b4601	uncharacterized protein YdgU	b1596	putative transporter YnfM	b4601	uncharacterized protein YdgU	4763752.0
1	1						46	1739082	597	600	41	IS30_IS30	1739082	1740302.0	NC_000913.3_art_ISs	1738481.0	1739081.0		1740303.0	1740903.0	NC_000913.3	1683536.0				1684737.0	IS only present in query Strain.	1. DLIS	Complete IS hit.	-	Intergenic/Pseudo/Repeaed Region	b1610	DNA replication terminus site-binding protein	b1609	sensory histidine kinase RstB	b1610	DNA replication terminus site-binding protein	4763752.0
1	1						47	1744580	598	600	42	IS30_IS30	1744580	1745800.0	NC_000913.3_art_ISs	1743979.0	1744579.0		1745801.0	1746401.0	NC_000913.3	1687813.0				1689014.0	IS only present in query Strain.	1. DLIS	Complete IS hit.	b1612	fumarase A	b1613	mannose-6-phosphate isomerase	b1612	fumarase A	b1613	mannose-6-phosphate isomerase	4763752.0
1	1						48	1763370	599	600	43	IS30_IS30	1763370	1764590.0	NC_000913.3_art_ISs	1762769.0	1763369.0		1764591.0	1765191.0	NC_000913.3	1705382.0				1706583.0	IS only present in query Strain.	1. DLIS	Complete IS hit.	b1626	conserved inner membrane protein YdgK	b1628	SoxR [2Fe-2S] reducing system protein RsxB	b1626	conserved inner membrane protein YdgK	b1628	SoxR [2Fe-2S] reducing system protein RsxB	4763752.0
1	1						49	1767126	600	600	44	IS30_IS30	1767126	1768346.0	NC_000913.3_art_ISs	1766525.0	1767125.0		1768347.0	1768947.0	NC_000913.3	1707917.0				1709118.0	IS only present in query Strain.	1. DLIS	Complete IS hit.	-	Intergenic/Pseudo/Repeaed Region	-	Intergenic/Pseudo/Repeaed Region	b1629	SoxR [2Fe-2S] reducing system protein RsxC	b1629	SoxR [2Fe-2S] reducing system protein RsxC	4763752.0
1	1						50	1803050	601	600	45	IS30_IS30	1803050	1804270.0	NC_000913.3_art_ISs	1802449.0	1803049.0		1804271.0	1804871.0	NC_000913.3	1742620.0				1743821.0	IS only present in query Strain.	1. DLIS	Complete IS hit.	-	Intergenic/Pseudo/Repeaed Region	b1663	multidrug efflux pump MdtK	b1662	riboflavin synthase	b1663	multidrug efflux pump MdtK	4763752.0
	1			1			51	1869279	602	600	95	IS30_IS30	1869279	1870499.0	NC_000913.3_art_ISs	1868678.0	1869278.0		1870500.0	1871100.0							IS only present in query Strain.	2. Verify manually, possible false positive caused by consecutive ISs.		b1724	protein YdiZ	-	Intergenic/Pseudo/Repeaed Region	-	-	-	-	4763752.0
	1			1			52	1870520	603	600	96	IS30_IS30	1870520	1871740.0	NC_000913.3_art_ISs	1869919.0	1870519.0		1871741.0	1872341.0							IS only present in query Strain.	2. Verify manually, possible false positive caused by consecutive ISs.		-	Intergenic/Pseudo/Repeaed Region	b1726	uncharacterized protein YniB	-	-	-	-	4763752.0
1	1						53	1904586	604	600	46	IS30_IS30	1904586	1905806.0	NC_000913.3_art_ISs	1903985.0	1904585.0		1905807.0	1906407.0	NC_000913.3	1840493.0				1841694.0	IS only present in query Strain.	1. DLIS	Complete IS hit.	b1757	molybdopterin synthase sulfurtransferase	b1759	5-hydroxy-CTP diphosphatase	b1757	molybdopterin synthase sulfurtransferase	b1759	5-hydroxy-CTP diphosphatase	4763752.0
1	1						54	1932848	605	600	47	IS30_IS30	1932848	1934068.0	NC_000913.3_art_ISs	1932247.0	1932847.0		1934069.0	1934669.0	NC_000913.3	1867534.0				1868735.0	IS only present in query Strain.	1. DLIS	Complete IS hit.	-	Intergenic/Pseudo/Repeaed Region	-	Intergenic/Pseudo/Repeaed Region	b1783	protein kinase YeaG	b1783	protein kinase YeaG	4763752.0
1	1						55	1937860	606	600	48	IS30_IS30	1937860	1939080.0	NC_000913.3_art_ISs	1937259.0	1937859.0		1939081.0	1939681.0	NC_000913.3	1871325.0				1872526.0	IS only present in query Strain.	1. DLIS	Complete IS hit.	b1785	putative c-di-GMP binding protein CdgI	b1786	putative diguanylate cyclase DgcJ	b1785	putative c-di-GMP binding protein CdgI	b1786	putative diguanylate cyclase DgcJ	4763752.0
1	1						56	2146825	607	600	49	IS30_IS30	2146825	2148045.0	NC_000913.3_art_ISs	2146224.0	2146824.0		2148046.0	2148646.0	NC_000913.3	2079069.0				2080270.0	IS only present in query Strain.	1. DLIS	Complete IS hit.	b2007	DUF496 domain-containing protein YeeX	-	Intergenic/Pseudo/Repeaed Region	b2007	DUF496 domain-containing protein YeeX	b2008	putative transporter YeeA	4763752.0
1	1						57	2291220	608	600	50	IS30_IS30	2291220	2292440.0	NC_000913.3_art_ISs	2290619.0	2291219.0		2292441.0	2293041.0	NC_000913.3	2222243.0				2223444.0	IS only present in query Strain.	1. DLIS	Complete IS hit.	-	Intergenic/Pseudo/Repeaed Region	-	Intergenic/Pseudo/Repeaed Region	b2133	D-lactate dehydrogenase	b2133	D-lactate dehydrogenase	4763752.0
1	1						58	2302324	609	600	51	IS30_IS30	2302324	2303544.0	NC_000913.3_art_ISs	2301723.0	2302323.0		2303545.0	2304145.0	NC_000913.3	2232126.0				2233327.0	IS only present in query Strain.	1. DLIS	Complete IS hit.	-	Intergenic/Pseudo/Repeaed Region	b2144	DUF218 domain-containing protein SanA	b2143	cytidine/deoxycytidine deaminase	b2144	DUF218 domain-containing protein SanA	4763752.0
1	1						59	2305151	610	600	52	IS30_IS30	2305151	2306371.0	NC_000913.3_art_ISs	2304550.0	2305150.0		2306372.0	2306972.0	NC_000913.3	2233732.0				2234933.0	IS only present in query Strain.	1. DLIS	Complete IS hit.	b2145	DUF2542 domain-containing protein YeiS	-	Intergenic/Pseudo/Repeaed Region	b2145	DUF2542 domain-containing protein YeiS	b2146	NAD-dependent dihydropyrimidine dehydrogenase subunit PreT	4763752.0
	1			1			60	2314302	611	600	97	IS30_IS30	2314302	2315125.0	NC_000913.3_art_ISs	2313701.0	2314301.0		2315126.0	2315726.0							IS only present in query Strain.	2. Verify manually, possible false positive caused by consecutive ISs.	Partial IS hit.	b2151	DNA-binding transcriptional dual regulator GalS	-	Intergenic/Pseudo/Repeaed Region	-	-	-	-	4763752.0
	1			1			61	2315125	612	600	98	IS30_IS30	2315125	2315756.0	NC_000913.3_art_ISs	2314524.0	2315124.0		2315757.0	2316357.0							IS only present in query Strain.	2. Verify manually, possible false positive caused by consecutive ISs.	Partial IS hit.	-	Intergenic/Pseudo/Repeaed Region	-	Intergenic/Pseudo/Repeaed Region	-	-	-	-	4763752.0
	1			1			62	2315757	613	600	99	IS30_IS30	2315757	2316977.0	NC_000913.3_art_ISs	2315156.0	2315756.0		2316978.0	2317578.0	NC_000913.3	270572.0				271761.0	IS only present in query Strain.	2. Verify manually, possible false positive caused by consecutive ISs.	Complete IS hit.	-	Intergenic/Pseudo/Repeaed Region	-	Intergenic/Pseudo/Repeaed Region	-	Intergenic/Pseudo/Repeaed Region	-	Intergenic/Pseudo/Repeaed Region	4763752.0
1	1						63	2331004	614	600	53	IS30_IS30	2331004	2332224.0	NC_000913.3_art_ISs	2330403.0	2331003.0		2332225.0	2332825.0	NC_000913.3	2254701.0				2255902.0	IS only present in query Strain.	1. DLIS	Complete IS hit.	b2162	pyrimidine-specific ribonucleoside hydrolase RihB	b2163	putative DNA-binding transcriptional regulator YeiL	b2162	pyrimidine-specific ribonucleoside hydrolase RihB	b2163	putative DNA-binding transcriptional regulator YeiL	4763752.0
1	1						64	2338335	615	600	54	IS30_IS30	2338335	2339555.0	NC_000913.3_art_ISs	2337734.0	2338334.0		2339556.0	2340156.0	NC_000913.3	2260811.0				2262012.0	IS only present in query Strain.	1. DLIS	Complete IS hit.	b2167	fructose-specific PTS multiphosphoryl transfer protein FruA	b2168	1-phosphofructokinase	b2167	fructose-specific PTS multiphosphoryl transfer protein FruA	b2168	1-phosphofructokinase	4763752.0
1	1						65	2415048	616	600	55	IS30_IS30	2415048	2416268.0	NC_000913.3_art_ISs	2414447.0	2415047.0		2416269.0	2416869.0	NC_000913.3	2336303.0				2337504.0	IS only present in query Strain.	1. DLIS	Complete IS hit.	b2230	DUF2138 domain-containing protein YfaA	-	Intergenic/Pseudo/Repeaed Region	b2230	DUF2138 domain-containing protein YfaA	b2231	DNA gyrase subunit A	4763752.0
1	1						66	2462961	617	600	56	IS30_IS30	2462961	2464181.0	NC_000913.3_art_ISs	2462360.0	2462960.0		2464182.0	2464782.0	NC_000913.3	2382995.0				2384196.0	IS only present in query Strain.	1. DLIS	Complete IS hit.	-	Intergenic/Pseudo/Repeaed Region	b2270	IPR002035/DUF3520 domain-containing protein YfbK	b2269	protease ElaD	b2270	IPR002035/DUF3520 domain-containing protein YfbK	4763752.0
1	1						67	2528130	618	600	57	IS30_IS30	2528130	2529350.0	NC_000913.3_art_ISs	2527529.0	2528129.0		2529351.0	2529951.0	NC_000913.3	2446943.0				2448144.0	IS only present in query Strain.	1. DLIS	Complete IS hit.	b2329	chorismate synthase	-	Intergenic/Pseudo/Repeaed Region	b2329	chorismate synthase	b2330	50S ribosomal subunit protein L3 N(5)-glutamine methyltransferase	4763752.0
1	1						68	2951446	619	600	58	IS30_IS30	2951446	2952666.0	NC_000913.3_art_ISs	2950845.0	2951445.0		2952667.0	2953267.0	NC_000913.3	2869038.0				2870239.0	IS only present in query Strain.	1. DLIS	Complete IS hit.	b2743	L-isoaspartate protein carboxylmethyltransferase type II	-	Intergenic/Pseudo/Repeaed Region	b2743	L-isoaspartate protein carboxylmethyltransferase type II	b2744	broad specificity 5'(3')-nucleotidase and polyphosphatase	4763752.0
1	1						69	2954441	620	600	59	IS30_IS30	2954441	2955661.0	NC_000913.3_art_ISs	2953840.0	2954440.0		2955662.0	2956262.0	NC_000913.3	2870812.0				2872013.0	IS only present in query Strain.	1. DLIS	Complete IS hit.	b2745	tRNA pseudouridine(13) synthase	b2747	2-C-methyl-D-erythritol 4-phosphate cytidylyltransferase	b2745	tRNA pseudouridine(13) synthase	b2747	2-C-methyl-D-erythritol 4-phosphate cytidylyltransferase	4763752.0
1	1						70	2983613	621	600	60	IS30_IS30	2983613	2984833.0	NC_000913.3_art_ISs	2983012.0	2983612.0		2984834.0	2985434.0	NC_000913.3	2898763.0				2899964.0	IS only present in query Strain.	1. DLIS	Complete IS hit.	-	Intergenic/Pseudo/Repeaed Region	b2774	putative deoxygluconate dehydrogenase	b4463	putative FAD-containing dehydrogenase	b2774	putative deoxygluconate dehydrogenase	4763752.0
1	1						71	3057300	622	600	61	IS30_IS30	3057300	3058520.0	NC_000913.3_art_ISs	3056699.0	3057299.0		3058521.0	3059121.0	NC_000913.3	2971229.0				2972430.0	IS only present in query Strain.	1. DLIS	Complete IS hit.	-	Intergenic/Pseudo/Repeaed Region	-	Intergenic/Pseudo/Repeaed Region	-	Intergenic/Pseudo/Repeaed Region	b2834	putative NADP(H)-dependent aldo-keto reductase Tas	4763752.0
1	1						72	3104435	623	600	62	IS30_IS30	3104435	3105655.0	NC_000913.3_art_ISs	3103834.0	3104434.0		3105656.0	3106256.0	NC_000913.3	3017143.0				3018344.0	IS only present in query Strain.	1. DLIS	Complete IS hit.	-	Intergenic/Pseudo/Repeaed Region	-	Intergenic/Pseudo/Repeaed Region	b2878	putative oxidoreductase; Fe-S subunit	b2878	putative oxidoreductase; Fe-S subunit	4763752.0
1	1						73	3137784	624	600	63	IS30_IS30	3137784	3139004.0	NC_000913.3_art_ISs	3137183.0	3137783.0		3139005.0	3139605.0	NC_000913.3	3049271.0				3050472.0	IS only present in query Strain.	1. DLIS	Complete IS hit.	b2904	glycine cleavage system H protein	-	Intergenic/Pseudo/Repeaed Region	b2904	glycine cleavage system H protein	b2905	aminomethyltransferase	4763752.0
1	1						74	3161238	625	600	64	IS30_IS30	3161238	3162458.0	NC_000913.3_art_ISs	3160637.0	3161237.0		3162459.0	3163059.0	NC_000913.3	3071504.0				3072705.0	IS only present in query Strain.	1. DLIS	Complete IS hit.	-	Intergenic/Pseudo/Repeaed Region	b2927	D-erythrose-4-phosphate dehydrogenase	b2926	phosphoglycerate kinase	b2927	D-erythrose-4-phosphate dehydrogenase	4763752.0
1	1						75	3226249	626	600	65	IS30_IS30	3226249	3227469.0	NC_000913.3_art_ISs	3225648.0	3226248.0		3227470.0	3228070.0	NC_000913.3	3135294.0				3136495.0	IS only present in query Strain.	1. DLIS	Complete IS hit.	-	Intergenic/Pseudo/Repeaed Region	-	Intergenic/Pseudo/Repeaed Region	b2987	metal phosphate:H(+) symporter PitB	-	Intergenic/Pseudo/Repeaed Region	4763752.0
1	1						76	3361527	627	600	66	IS30_IS30	3361527	3362747.0	NC_000913.3_art_ISs	3360926.0	3361526.0		3362748.0	3363348.0	NC_000913.3	3269351.0				3270552.0	IS only present in query Strain.	1. DLIS	Complete IS hit.	b3121	uncharacterized protein YhaC	-	Intergenic/Pseudo/Repeaed Region	b3121	uncharacterized protein YhaC	-	Intergenic/Pseudo/Repeaed Region	4763752.0
1	1						77	3386688	628	600	67	IS30_IS30	3386688	3387908.0	NC_000913.3_art_ISs	3386087.0	3386687.0		3387909.0	3388509.0	NC_000913.3	3293291.0				3294492.0	IS only present in query Strain.	1. DLIS	Complete IS hit.	b3146	16S rRNA 2'-O-ribose C1402 methyltransferase	-	Intergenic/Pseudo/Repeaed Region	b3146	16S rRNA 2'-O-ribose C1402 methyltransferase	b3147	outer membrane lipoprotein - activator of MrcA activity	4763752.0
1	1						78	3441448	629	600	68	IS30_IS30	3441448	3442668.0	NC_000913.3_art_ISs	3440847.0	3441447.0		3442669.0	3443269.0	NC_000913.3	3346830.0				3348031.0	IS only present in query Strain.	1. DLIS	Complete IS hit.	b3204	phosphotransferase system enzyme IIA(Ntr)	b3206	phosphorelay protein Npr	b3204	phosphotransferase system enzyme IIA(Ntr)	b3206	phosphorelay protein Npr	4763752.0
1	1						79	3596382	630	600	69	IS30_IS30	3596382	3597602.0	NC_000913.3_art_ISs	3595781.0	3596381.0		3597603.0	3598203.0	NC_000913.3	3500543.0				3501744.0	IS only present in query Strain.	1. DLIS	Complete IS hit.	-	Intergenic/Pseudo/Repeaed Region	b3371	fructoselysine 6-phosphate deglycase	b3370	fructoselysine/psicoselysine transporter	b3371	fructoselysine 6-phosphate deglycase	4763752.0
1	1						80	3615538	631	600	70	IS30_IS30	3615538	3616758.0	NC_000913.3_art_ISs	3614937.0	3615537.0		3616759.0	3617359.0	NC_000913.3	3518478.0				3519679.0	IS only present in query Strain.	1. DLIS	Complete IS hit.	b3389	3-dehydroquinate synthase	-	Intergenic/Pseudo/Repeaed Region	b3389	3-dehydroquinate synthase	b3391	DNA utilization protein HofQ	4763752.0
1	1						81	3617769	632	600	71	IS30_IS30	3617769	3618989.0	NC_000913.3_art_ISs	3617168.0	3617768.0		3618990.0	3619590.0	NC_000913.3	3519488.0				3520689.0	IS only present in query Strain.	1. DLIS	Complete IS hit.	-	Intergenic/Pseudo/Repeaed Region	b3392	DNA utilization protein HofP	b3391	DNA utilization protein HofQ	b3391	DNA utilization protein HofQ	4763752.0
1	1						82	3654946	633	600	72	IS30_IS30	3654946	3656166.0	NC_000913.3_art_ISs	3654345.0	3654945.0		3656167.0	3656767.0	NC_000913.3	3555444.0				3556645.0	IS only present in query Strain.	1. DLIS	Complete IS hit.	b3418	DNA-binding transcriptional activator MalT	-	Intergenic/Pseudo/Repeaed Region	b3418	DNA-binding transcriptional activator MalT	b4475	RNA 3'-terminal phosphate cyclase	4763752.0
1	1						83	3658126	634	600	73	IS30_IS30	3658126	3659346.0	NC_000913.3_art_ISs	3657525.0	3658125.0		3659347.0	3659947.0	NC_000913.3	3557403.0				3558604.0	IS only present in query Strain.	1. DLIS	Complete IS hit.	-	Intergenic/Pseudo/Repeaed Region	b3422	DNA-binding transcriptional activator RtcR	b3421	RNA-splicing ligase	b3422	DNA-binding transcriptional activator RtcR	4763752.0
1	1						84	3727323	635	600	74	IS30_IS30	3727323	3728543.0	NC_000913.3_art_ISs	3726722.0	3727322.0		3728544.0	3729144.0	NC_000913.3	3625379.0				3626580.0	IS only present in query Strain.	1. DLIS	Complete IS hit.	b3484	putative transposase	-	Intergenic/Pseudo/Repeaed Region	b3484	putative transposase	b3485	ABC transporter family protein YhhJ	4763752.0
1	1						85	3766127	636	600	75	IS30_IS30	3766127	3767347.0	NC_000913.3_art_ISs	3765526.0	3766126.0		3767348.0	3767948.0	NC_000913.3	3662962.0				3664163.0	IS only present in query Strain.	1. DLIS	Complete IS hit.	b3514	multidrug efflux pump RND permease MdtF	b3515	DNA-binding transcriptional dual regulator GadW	b3514	multidrug efflux pump RND permease MdtF	b3515	DNA-binding transcriptional dual regulator GadW	4763752.0
1	1						86	3798695	637	600	76	IS30_IS30	3798695	3799915.0	NC_000913.3_art_ISs	3798094.0	3798694.0		3799916.0	3800516.0	NC_000913.3	3694309.0				3695510.0	IS only present in query Strain.	1. DLIS	Complete IS hit.	-	Intergenic/Pseudo/Repeaed Region	b3534	cellulose biosynthesis protein	b3533	cellulose synthase catalytic subunit	b3534	cellulose biosynthesis protein	4763752.0
1	1						87	3900620	638	600	77	IS30_IS30	3900620	3901840.0	NC_000913.3_art_ISs	3900019.0	3900619.0		3901841.0	3902441.0	NC_000913.3	3795013.0				3796214.0	IS only present in query Strain.	1. DLIS	Complete IS hit.	-	Intergenic/Pseudo/Repeaed Region	b3621	ADP-heptose:LPS heptosyltransferase 1	b3620	ADP-heptose--LPS heptosyltransferase 2	b3621	ADP-heptose:LPS heptosyltransferase 1	4763752.0
1	1						88	4006509	639	600	78	IS30_IS30	4006509	4007729.0	NC_000913.3_art_ISs	4005908.0	4006508.0		4007730.0	4008330.0	NC_000913.3	3899681.0				3900882.0	IS only present in query Strain.	1. DLIS	Complete IS hit.	-	Intergenic/Pseudo/Repeaed Region	b3720	carbohydrate-specific outer membrane porin; cryptic	b3719	putative hydrolase YieL	b3720	carbohydrate-specific outer membrane porin; cryptic	4763752.0
1	1						89	4013286	640	600	79	IS30_IS30	4013286	4014506.0	NC_000913.3_art_ISs	4012685.0	4013285.0		4014507.0	4015107.0	NC_000913.3	3905237.0				3906438.0	IS only present in query Strain.	1. DLIS	Complete IS hit.	b3722	beta-glucoside specific PTS enzyme II/BglG kinase/BglG phosphatase	-	Intergenic/Pseudo/Repeaed Region	b3722	beta-glucoside specific PTS enzyme II/BglG kinase/BglG phosphatase	b3723	transcriptional antiterminator BglG	4763752.0
1	1						90	4027534	641	600	80	IS30_IS30	4027534	4028754.0	NC_000913.3_art_ISs	4026933.0	4027533.0		4028755.0	4029355.0	NC_000913.3	3918264.0				3919465.0	IS only present in query Strain.	1. DLIS	Complete IS hit.	b3733	ATP synthase F1 complex subunit gamma	-	Intergenic/Pseudo/Repeaed Region	b3733	ATP synthase F1 complex subunit gamma	b3734	ATP synthase F1 complex subunit alpha	4763752.0
1	1						91	4248889	642	600	81	IS30_IS30	4248889	4250109.0	NC_000913.3_art_ISs	4248288.0	4248888.0		4250110.0	4250710.0	NC_000913.3	4138398.0				4139599.0	IS only present in query Strain.	1. DLIS	Complete IS hit.	-	Intergenic/Pseudo/Repeaed Region	b3946	fructose-6-phosphate aldolase 2	b3945	L-1;2-propanediol dehydrogenase/glycerol dehydrogenase	b3946	fructose-6-phosphate aldolase 2	4763752.0
1	1						92	4260696	643	600	82	IS30_IS30	4260696	4261916.0	NC_000913.3_art_ISs	4260095.0	4260695.0		4261917.0	4262517.0	NC_000913.3	4148984.0				4150185.0	IS only present in query Strain.	1. DLIS	Complete IS hit.	-	Intergenic/Pseudo/Repeaed Region	-	Intergenic/Pseudo/Repeaed Region	b3955	phosphoethanolamine transferase EptC	b3955	phosphoethanolamine transferase EptC	4763752.0
1	1						93	4264502	644	600	83	IS30_IS30	4264502	4265722.0	NC_000913.3_art_ISs	4263901.0	4264501.0		4265723.0	4266323.0	NC_000913.3	4151569.0				4152770.0	IS only present in query Strain.	1. DLIS	Complete IS hit.	-	Intergenic/Pseudo/Repeaed Region	-	Intergenic/Pseudo/Repeaed Region	b3956	phosphoenolpyruvate carboxylase	b3956	phosphoenolpyruvate carboxylase	4763752.0
1	1						94	4311821	645	600	84	IS30_IS30	4311821	4313041.0	NC_000913.3_art_ISs	4311220.0	4311820.0		4313042.0	4313642.0	NC_000913.3	4197667.0				4198868.0	IS only present in query Strain.	1. DLIS	Complete IS hit.	b3996	NADH pyrophosphatase	b3998	endonuclease V	b3996	NADH pyrophosphatase	b3998	endonuclease V	4763752.0
1	1						95	4389275	646	600	85	IS30_IS30	4389275	4390495.0	NC_000913.3_art_ISs	4388674.0	4389274.0		4390496.0	4391096.0	NC_000913.3	4273900.0				4275101.0	IS only present in query Strain.	1. DLIS	Complete IS hit.	-	Intergenic/Pseudo/Repeaed Region	-	Intergenic/Pseudo/Repeaed Region	-	Intergenic/Pseudo/Repeaed Region	-	Intergenic/Pseudo/Repeaed Region	4763752.0
1	1						96	4434397	647	600	86	IS30_IS30	4434397	4435617.0	NC_000913.3_art_ISs	4433796.0	4434396.0		4435618.0	4436218.0	NC_000913.3	4317801.0				4319002.0	IS only present in query Strain.	1. DLIS	Complete IS hit.	b4096	methylphosphonate degradation complex subunit PhnL	b4098	carbon-phosphorus lyase core complex subunit PhnJ	b4096	methylphosphonate degradation complex subunit PhnL	b4098	carbon-phosphorus lyase core complex subunit PhnJ	4763752.0
	1			1			97	4461112	648	600	102	IS30_IS30	4461112	4461482.0	NC_000913.3_art_ISs	4460511.0	4461111.0		4461483.0	4462083.0							IS only present in query Strain.	2. Verify manually, possible false positive caused by consecutive ISs.	Partial IS hit.	-	Intergenic/Pseudo/Repeaed Region	-	Intergenic/Pseudo/Repeaed Region	-	-	-	-	4763752.0
	1			1			98	4461481	649	600	103	IS30_IS30	4461481	4462701.0	NC_000913.3_art_ISs	4460880.0	4461480.0		4462702.0	4463302.0							IS only present in query Strain.	2. Verify manually, possible false positive caused by consecutive ISs.		-	Intergenic/Pseudo/Repeaed Region	-	Intergenic/Pseudo/Repeaed Region	-	-	-	-	4763752.0
1	1						99	4509587	650	600	87	IS30_IS30	4509587	4510807.0	NC_000913.3_art_ISs	4508986.0	4509586.0		4510808.0	4511408.0	NC_000913.3	4389328.0				4390529.0	IS only present in query Strain.	1. DLIS	Complete IS hit.	b4159	miniconductance mechanosensitive channel MscM	b4161	ribosome small subunit-dependent GTPase A	b4159	miniconductance mechanosensitive channel MscM	b4161	ribosome small subunit-dependent GTPase A	4763752.0
1	1						100	4524761	651	600	88	IS30_IS30	4524761	4525981.0	NC_000913.3_art_ISs	4524160.0	4524760.0		4525982.0	4526582.0	NC_000913.3	4403281.0				4404482.0	IS only present in query Strain.	1. DLIS	Complete IS hit.	b4174	regulator of FtsH protease	b4176	DUF2065 domain-containing protein YjeT	b4174	regulator of FtsH protease	b4176	DUF2065 domain-containing protein YjeT	4763752.0
			1						652	600	90	IS30_IS30	249701	250822.0	NC_000913.3_art_ISs	249100.0	249700.0		250823.0	251423.0							IS only present in query Strain.	2. Verify manually, possible false positive caused by consecutive ISs.	Partial IS hit.	-	Intergenic/Pseudo/Repeaed Region	-	Intergenic/Pseudo/Repeaed Region	-	-	-	-	4763752.0
			1						653	600	91	ISEc1_ISAs1	736682	737971.0	NC_000913.3_art_ISs	762943.0				764167.0	NC_000913.3	736081.0	736681.0		737972.0	738572.0	IS only present in ref Strain.	2. Verify manually, possible false positive caused by consecutive ISs.	Complete IS hit.	b0704	uncharacterized protein YbfC	b0705	putative transposase YbfL	b0681	chitobiose outer membrane channel	b0684	flavodoxin 1	4641652.0
			1						654	600	92	ISEc1_ISAs1	763544	764833.0	NC_000913.3_art_ISs	762943.0	763543.0		764834.0	765434.0	NC_000913.3	736081.0				737305.0	IS only present in query Strain.	2. Verify manually, possible false positive caused by consecutive ISs.	Complete IS hit.	b0704	uncharacterized protein YbfC	b0706	H repeat-associated putative transposase YbfD	b0704	uncharacterized protein YbfC	b0705	putative transposase YbfL	4763752.0
			1						655	600	100	IS30_IS30	2316971	2317566.0	NC_000913.3_art_ISs	2316370.0	2316970.0		2317567.0	2318167.0							IS only present in query Strain.	2. Verify manually, possible false positive caused by consecutive ISs.	Partial IS hit.	-	Intergenic/Pseudo/Repeaed Region	-	Intergenic/Pseudo/Repeaed Region	-	-	-	-	4763752.0
			1						656	600	101	IS30_IS30	2317567	2317964.0	NC_000913.3_art_ISs	2316966.0	2317566.0		2317965.0	2318565.0							IS only present in query Strain.	2. Verify manually, possible false positive caused by consecutive ISs.	Partial IS hit.	-	Intergenic/Pseudo/Repeaed Region	-	Intergenic/Pseudo/Repeaed Region	-	-	-	-	4763752.0
			1						657	600	104	IS30_IS30	4462702	4463553.0	NC_000913.3_art_ISs	4462101.0	4462701.0		4463554.0	4464154.0							IS only present in query Strain.	2. Verify manually, possible false positive caused by consecutive ISs.	Partial IS hit.	-	Intergenic/Pseudo/Repeaed Region	-	Intergenic/Pseudo/Repeaed Region	-	-	-	-	4763752.0
			1						658	600	105	IS2_IS2_IS3	399833	400905.0	NC_000913.3_art_ISs	399232.0	399832.0		400906.0	401506.0							IS only present in query Strain.	5. Discarded for analysis. There were multiple blastn hits, and left and right pairs could not be determined.	Partial IS hit.	-	Intergenic/Pseudo/Repeaed Region	b0363	putative glucosyltransferase	-	-	-	-	4763752.0
			1						659	600	106	ISEc1_ISAs1	3624234	3625524.0	NC_000913.3_art_ISs	3726868.0	3727322.0				NC_000913.3	3623633.0	3624233.0		3625525.0	3626125.0	IS only present in ref Strain.	5. Discarded for analysis. There were multiple blastn hits, and left and right pairs could not be determined.		-	Intergenic/Pseudo/Repeaed Region	-	-	b3396	peptidoglycan glycosyltransferase/peptidoglycan DD-transpeptidase MrcA	b3398	inner membrane protein - inhibits the Rcs signaling pathway	4641652.0
			1						660	600	107	ISEc1_ISAs1	3725577	3726867.0	NC_000913.3_art_ISs	3724976.0	3725576.0		3726868.0	3727468.0	NC_000913.3	3625525.0	3625979.0				IS only present in query Strain.	5. Discarded for analysis. There were multiple blastn hits, and left and right pairs could not be determined.		b3483	PF15631 family protein YhhH	-	Intergenic/Pseudo/Repeaed Region	b3485	ABC transporter family protein YhhJ	-	-	4763752.0
89	99	0	9	11	1	*			661	600
1	1						1	446	662	700	0	IS30_IS30	446	1666.0	NC_000913.3_art_ISs	1.0	445.0		1667.0	2367.0	NC_000913.3	1.0				1146.0	IS only present in query Strain.	1. DLIS	Complete IS hit.	-	Intergenic/Pseudo/Repeaed Region	-	Intergenic/Pseudo/Repeaed Region	-	Intergenic/Pseudo/Repeaed Region	b0002	fused aspartate kinase/homoserine dehydrogenase 1	4763752.0
1	1						2	3160	663	700	1	IS30_IS30	3160	4380.0	NC_000913.3_art_ISs	2459.0	3159.0		4381.0	5081.0	NC_000913.3	1238.0				2639.0	IS only present in query Strain.	1. DLIS	Complete IS hit.	-	Intergenic/Pseudo/Repeaed Region	-	Intergenic/Pseudo/Repeaed Region	b0002	fused aspartate kinase/homoserine dehydrogenase 1	b0002	fused aspartate kinase/homoserine dehydrogenase 1	4763752.0
1	1						3	123711	664	700	2	IS30_IS30	123711	124931.0	NC_000913.3_art_ISs	123010.0	123710.0		124932.0	125632.0	NC_000913.3	120568.0				121969.0	IS only present in query Strain.	1. DLIS	Complete IS hit.	-	Intergenic/Pseudo/Repeaed Region	-	Intergenic/Pseudo/Repeaed Region	b0112	aromatic amino acid:H(+) symporter AroP	-	Intergenic/Pseudo/Repeaed Region	4763752.0
1	1						4	142989	665	700	3	IS30_IS30	142989	144209.0	NC_000913.3_art_ISs	142288.0	142988.0		144210.0	144910.0	NC_000913.3	138625.0				140026.0	IS only present in query Strain.	1. DLIS	Complete IS hit.	b0123	cuprous oxidase/multicopper oxidase with role in copper homeostasis	-	Intergenic/Pseudo/Repeaed Region	b0123	cuprous oxidase/multicopper oxidase with role in copper homeostasis	b0124	quinoprotein glucose dehydrogenase	4763752.0
1	1						5	163498	666	700	4	IS30_IS30	163498	164718.0	NC_000913.3_art_ISs	162797.0	163497.0		164719.0	165419.0	NC_000913.3	157913.0				159314.0	IS only present in query Strain.	1. DLIS	Complete IS hit.	-	Intergenic/Pseudo/Repeaed Region	b0144	glutamyl-Q tRNA(Asp) synthetase	b0143	poly(A) polymerase I	b0144	glutamyl-Q tRNA(Asp) synthetase	4763752.0
1	1						6	240046	667	700	5	IS30_IS30	240046	241266.0	NC_000913.3_art_ISs	239345.0	240045.0		241267.0	241967.0	NC_000913.3	233240.0				234641.0	IS only present in query Strain.	1. DLIS	Complete IS hit.	-	Intergenic/Pseudo/Repeaed Region	b0212	hydroxyacylglutathione hydrolase GloB	b0211	membrane-bound lytic murein transglycosylase D	b0212	hydroxyacylglutathione hydrolase GloB	4763752.0
				1	1		7	248381	668	700
	1			1			8	248480	669	700	89	IS30_IS30	248480	249700.0	NC_000913.3_art_ISs	247779.0	248479.0		249701.0	250401.0							IS only present in query Strain.	2. Verify manually, possible false positive caused by consecutive ISs.		b0220	periplasmic chaperone; inhibitor of vertebrate C-type lysozyme	-	Intergenic/Pseudo/Repeaed Region	-	-	-	-	4763752.0
1	1						9	310515	670	700	6	IS30_IS30	310515	311735.0	NC_000913.3_art_ISs	309814.0	310514.0		311736.0	312436.0	NC_000913.3	300046.0				301447.0	IS only present in query Strain.	1. DLIS	Complete IS hit.	-	Intergenic/Pseudo/Repeaed Region	b0285	aldehyde dehydrogenase; FAD-binding subunit	b0284	aldehyde dehydrogenase: molybdenum cofactor-binding subunit	b0285	aldehyde dehydrogenase; FAD-binding subunit	4763752.0
1	1						10	315801	671	700	7	IS30_IS30	315801	317021.0	NC_000913.3_art_ISs	315100.0	315800.0		317022.0	317722.0	NC_000913.3	304111.0				305512.0	IS only present in query Strain.	1. DLIS	Complete IS hit.	b0288	putative zinc- or iron-chelating domain-containing protein YkgJ	b0290	fimbrial adhesin EcpD	b0288	putative zinc- or iron-chelating domain-containing protein YkgJ	b0290	fimbrial adhesin EcpD	4763752.0
1	1						11	333734	672	700	8	IS30_IS30	333734	334954.0	NC_000913.3_art_ISs	333033.0	333733.0		334955.0	335655.0	NC_000913.3	320823.0				322224.0	IS only present in query Strain.	1. DLIS	Complete IS hit.	b0305	DNA-binding transcriptional activator RclR	b0306	putative lactate utilization oxidoreductase YkgE	b0305	DNA-binding transcriptional activator RclR	b0306	putative lactate utilization oxidoreductase YkgE	4763752.0
1	1						12	356194	673	700	9	IS30_IS30	356194	357414.0	NC_000913.3_art_ISs	355493.0	356193.0		357415.0	358115.0	NC_000913.3	342062.0				343463.0	IS only present in query Strain.	1. DLIS	Complete IS hit.	b0324	putative deaminase with metallo-dependent hydrolase domain	b0325	aldehyde reductase; NADPH-dependent	b0324	putative deaminase with metallo-dependent hydrolase domain	b0325	aldehyde reductase; NADPH-dependent	4763752.0
1	1						13	361260	674	700	10	IS30_IS30	361260	362480.0	NC_000913.3_art_ISs	360559.0	361259.0		362481.0	363181.0	NC_000913.3	345907.0				347308.0	IS only present in query Strain.	1. DLIS	Complete IS hit.	b0328	putative amino acid exporter	b0330	DNA-binding transcriptional dual regulator PrpR	b0328	putative amino acid exporter	b0330	DNA-binding transcriptional dual regulator PrpR	4763752.0
1	1						14	395877	675	700	11	IS30_IS30	395877	397097.0	NC_000913.3_art_ISs	395176.0	395876.0		397098.0	397798.0	NC_000913.3	379303.0				380704.0	IS only present in query Strain.	1. DLIS	Complete IS hit.	b0356	S-(hydroxymethyl)glutathione dehydrogenase	b0358	outer membrane protein YaiO	b0356	S-(hydroxymethyl)glutathione dehydrogenase	b0358	outer membrane protein YaiO	4763752.0
1	1						15	398612	676	700	12	IS30_IS30	398612	399832.0	NC_000913.3_art_ISs	397911.0	398611.0		399833.0	400533.0	NC_000913.3	380817.0				382218.0	IS only present in query Strain.	1. DLIS	Complete IS hit.	b0358	outer membrane protein YaiO	b0361	IS2 element protein	b0358	outer membrane protein YaiO	b0361	IS2 element protein	4763752.0
1	1						16	458588	677	700	13	IS30_IS30	458588	459808.0	NC_000913.3_art_ISs	457887.0	458587.0		459809.0	460509.0	NC_000913.3	439572.0				440973.0	IS only present in query Strain.	1. DLIS	Complete IS hit.	b0420	1-deoxy-D-xylulose-5-phosphate synthase	-	Intergenic/Pseudo/Repeaed Region	b0420	1-deoxy-D-xylulose-5-phosphate synthase	b0421	geranyl diphosphate/farnesyl diphosphate synthase	4763752.0
1	1						17	515332	678	700	14	IS30_IS30	515332	516552.0	NC_000913.3_art_ISs	514631.0	515331.0		516553.0	517253.0	NC_000913.3	495095.0				496496.0	IS only present in query Strain.	1. DLIS	Complete IS hit.	-	Intergenic/Pseudo/Repeaed Region	-	Intergenic/Pseudo/Repeaed Region	-	Intergenic/Pseudo/Repeaed Region	b0473	chaperone protein HtpG	4763752.0
1	1						18	518331	679	700	15	IS30_IS30	518331	519551.0	NC_000913.3_art_ISs	517630.0	518330.0		519552.0	520252.0	NC_000913.3	496873.0				498274.0	IS only present in query Strain.	1. DLIS	Complete IS hit.	-	Intergenic/Pseudo/Repeaed Region	b0475	ferrochelatase	b0473	chaperone protein HtpG	b0475	ferrochelatase	4763752.0
1	1						19	564278	680	700	16	IS30_IS30	564278	565498.0	NC_000913.3_art_ISs	563577.0	564277.0		565499.0	566199.0	NC_000913.3	541599.0				543000.0	IS only present in query Strain.	1. DLIS	Complete IS hit.	b0513	putative purine transporter	-	Intergenic/Pseudo/Repeaed Region	b0513	putative purine transporter	b0514	glycerate 2-kinase 2	4763752.0
1	1						20	638410	681	700	17	IS30_IS30	638410	639630.0	NC_000913.3_art_ISs	637709.0	638409.0		639631.0	640331.0	NC_000913.3	614510.0				615911.0	IS only present in query Strain.	1. DLIS	Complete IS hit.	-	Intergenic/Pseudo/Repeaed Region	-	Intergenic/Pseudo/Repeaed Region	b0586	apo-serine activating enzyme	b0586	apo-serine activating enzyme	4763752.0
1	1						21	643571	682	700	18	IS30_IS30	643571	644791.0	NC_000913.3_art_ISs	642870.0	643570.0		644792.0	645492.0	NC_000913.3	618450.0				619851.0	IS only present in query Strain.	1. DLIS	Complete IS hit.	-	Intergenic/Pseudo/Repeaed Region	b0588	ferric enterobactin ABC transporter ATP binding subunit	b0587	polysaccharide co-polymerase family protein FepE	b0588	ferric enterobactin ABC transporter ATP binding subunit	4763752.0
1	1						22	709250	683	700	19	IS30_IS30	709250	710470.0	NC_000913.3_art_ISs	708549.0	709249.0		710471.0	711171.0	NC_000913.3	682908.0				684309.0	IS only present in query Strain.	1. DLIS	Complete IS hit.	b0650	chaperone protein HscC	-	Intergenic/Pseudo/Repeaed Region	b0650	chaperone protein HscC	b0651	pyrimidine-specific ribonucleoside hydrolase RihA	4763752.0
1	1						23	780879	684	700	20	IS30_IS30	780879	782099.0	NC_000913.3_art_ISs	780178.0	780878.0		782100.0	782800.0	NC_000913.3	753316.0				754717.0	IS only present in query Strain.	1. DLIS	Complete IS hit.	-	Intergenic/Pseudo/Repeaed Region	b4735	protein YbgU	b0720	citrate synthase	b4735	protein YbgU	4763752.0
1	1						24	794533	685	700	21	IS30_IS30	794533	795753.0	NC_000913.3_art_ISs	793832.0	794532.0		795754.0	796454.0	NC_000913.3	765749.0				767150.0	IS only present in query Strain.	1. DLIS	Complete IS hit.	b0730	DNA-binding transcriptional repressor MngR	-	Intergenic/Pseudo/Repeaed Region	b0730	DNA-binding transcriptional repressor MngR	b0731	2-O-alpha-mannosyl-D-glycerate specific PTS enzyme II	4763752.0
1	1						25	818746	686	700	22	IS30_IS30	818746	819966.0	NC_000913.3_art_ISs	818045.0	818745.0		819967.0	820667.0	NC_000913.3	788741.0				790142.0	IS only present in query Strain.	1. DLIS	Complete IS hit.	b0756	galactose-1-epimerase	b0758	galactose-1-phosphate uridylyltransferase	b0756	galactose-1-epimerase	b0758	galactose-1-phosphate uridylyltransferase	4763752.0
1	1						26	827842	687	700	23	IS30_IS30	827842	829062.0	NC_000913.3_art_ISs	827141.0	827841.0		829063.0	829763.0	NC_000913.3	796616.0				798017.0	IS only present in query Strain.	1. DLIS	Complete IS hit.	-	Intergenic/Pseudo/Repeaed Region	b0766	pyridoxal phosphate/fructose-1;6-bisphosphate phosphatase	b0765	molybdate ABC transporter ATP binding subunit	b0766	pyridoxal phosphate/fructose-1;6-bisphosphate phosphatase	4763752.0
1	1						27	840349	688	700	24	IS30_IS30	840349	841569.0	NC_000913.3_art_ISs	839648.0	840348.0		841570.0	842270.0	NC_000913.3	807902.0				809303.0	IS only present in query Strain.	1. DLIS	Complete IS hit.	b0773	putative kinase inhibitor	-	Intergenic/Pseudo/Repeaed Region	b0773	putative kinase inhibitor	-	Intergenic/Pseudo/Repeaed Region	4763752.0
1	1						28	866245	689	700	25	IS30_IS30	866245	867465.0	NC_000913.3_art_ISs	865544.0	866244.0		867466.0	868166.0	NC_000913.3	832577.0				833978.0	IS only present in query Strain.	1. DLIS	Complete IS hit.	b0798	N-glycosidase YbiA	-	Intergenic/Pseudo/Repeaed Region	b0798	N-glycosidase YbiA	b0799	ATP-dependent DNA helicase DinG	4763752.0
1	1						29	885800	690	700	26	IS30_IS30	885800	887020.0	NC_000913.3_art_ISs	885099.0	885799.0		887021.0	887721.0	NC_000913.3	850911.0				852312.0	IS only present in query Strain.	1. DLIS	Complete IS hit.	b0814	outer membrane protein X	-	Intergenic/Pseudo/Repeaed Region	b0814	outer membrane protein X	b0815	phosphoethanolamine transferase	4763752.0
1	1						30	1054897	691	700	27	IS30_IS30	1054897	1056117.0	NC_000913.3_art_ISs	1054196.0	1054896.0		1056118.0	1056818.0	NC_000913.3	1018787.0				1020188.0	IS only present in query Strain.	1. DLIS	Complete IS hit.	b0956	macrodomain Ter protein	-	Intergenic/Pseudo/Repeaed Region	b0956	macrodomain Ter protein	-	Intergenic/Pseudo/Repeaed Region	4763752.0
1	1						31	1102873	692	700	28	IS30_IS30	1102873	1104093.0	NC_000913.3_art_ISs	1102172.0	1102872.0		1104094.0	1104794.0	NC_000913.3	1065542.0				1066943.0	IS only present in query Strain.	1. DLIS	Complete IS hit.	-	Intergenic/Pseudo/Repeaed Region	b1003	PF13993 family protein YccJ	-	Intergenic/Pseudo/Repeaed Region	b1003	PF13993 family protein YccJ	4763752.0
1	1						32	1118119	693	700	29	IS30_IS30	1118119	1119339.0	NC_000913.3_art_ISs	1117418.0	1118118.0		1119340.0	1120040.0	NC_000913.3	1079567.0				1080968.0	IS only present in query Strain.	1. DLIS	Complete IS hit.	-	Intergenic/Pseudo/Repeaed Region	-	Intergenic/Pseudo/Repeaed Region	b1015	proline:Na(+) symporter	-	Intergenic/Pseudo/Repeaed Region	4763752.0
1	1						33	1150109	694	700	30	IS30_IS30	1150109	1151329.0	NC_000913.3_art_ISs	1149408.0	1150108.0		1151330.0	1152030.0	NC_000913.3	1110336.0				1111737.0	IS only present in query Strain.	1. DLIS	Complete IS hit.	b1048	osmoregulated periplasmic glucans (OPGs) biosynthesis protein G	-	Intergenic/Pseudo/Repeaed Region	b1048	osmoregulated periplasmic glucans (OPGs) biosynthesis protein G	b1049	osmoregulated periplasmic glucans (OPGs) biosynthesis protein H	4763752.0
1	1						34	1165669	695	700	31	IS30_IS30	1165669	1166889.0	NC_000913.3_art_ISs	1164968.0	1165668.0		1166890.0	1167590.0	NC_000913.3	1124675.0				1126076.0	IS only present in query Strain.	1. DLIS	Complete IS hit.	b1065	multidrug efflux pump MdtH	b1066	ribosomal-protein-S5-alanine N-acetyltransferase	b1065	multidrug efflux pump MdtH	b1066	ribosomal-protein-S5-alanine N-acetyltransferase	4763752.0
1	1						35	1252656	696	700	32	IS30_IS30	1252656	1253876.0	NC_000913.3_art_ISs	1251955.0	1252655.0		1253877.0	1254577.0	NC_000913.3	1210441.0				1211842.0	IS only present in query Strain.	1. DLIS	Complete IS hit.	-	Intergenic/Pseudo/Repeaed Region	b1160	anti-adaptor protein IraM; inhibitor of sigma(S) proteolysis	b1159	e14 prophage; 5-methylcytosine-specific restriction enzyme McrA	b1160	anti-adaptor protein IraM; inhibitor of sigma(S) proteolysis	4763752.0
1	1						36	1314729	697	700	33	IS30_IS30	1314729	1315949.0	NC_000913.3_art_ISs	1314028.0	1314728.0		1315950.0	1316650.0	NC_000913.3	1271293.0				1272694.0	IS only present in query Strain.	1. DLIS	Complete IS hit.	b1216	Na(+)/K(+):H(+) antiporter ChaA	-	Intergenic/Pseudo/Repeaed Region	b1216	Na(+)/K(+):H(+) antiporter ChaA	b1218	glutathione-specific gamma-glutamylcyclotransferase	4763752.0
1	1						37	1316873	698	700	34	IS30_IS30	1316873	1318093.0	NC_000913.3_art_ISs	1316172.0	1316872.0		1318094.0	1318794.0	NC_000913.3	1272216.0				1273617.0	IS only present in query Strain.	1. DLIS	Complete IS hit.	b1217	putative cation transport regulator ChaB	-	Intergenic/Pseudo/Repeaed Region	b1217	putative cation transport regulator ChaB	-	Intergenic/Pseudo/Repeaed Region	4763752.0
1	1						38	1332696	699	700	35	IS30_IS30	1332696	1333916.0	NC_000913.3_art_ISs	1331995.0	1332695.0		1333917.0	1334617.0	NC_000913.3	1286818.0				1288219.0	IS only present in query Strain.	1. DLIS	Complete IS hit.	b1228	putative uncharacterized protein YchS	b1232	formyltetrahydrofolate deformylase	b1228	putative uncharacterized protein YchS	b1232	formyltetrahydrofolate deformylase	4763752.0
1	1						39	1477755	700	700	36	IS30_IS30	1477755	1478975.0	NC_000913.3_art_ISs	1477054.0	1477754.0		1478976.0	1479676.0	NC_000913.3	1430656.0				1432057.0	IS only present in query Strain.	1. DLIS	Complete IS hit.	-	Intergenic/Pseudo/Repeaed Region	-	Intergenic/Pseudo/Repeaed Region	b1372	Rac prophage; putative membrane protein	b1372	Rac prophage; putative membrane protein	4763752.0
1	1						40	1530090	701	700	37	IS30_IS30	1530090	1531310.0	NC_000913.3_art_ISs	1529389.0	1530089.0		1531311.0	1532011.0	NC_000913.3	1481770.0				1483171.0	IS only present in query Strain.	1. DLIS	Complete IS hit.	b1411	putative phosphatase	b1413	ATP-dependent RNA helicase HrpA	b1411	putative phosphatase	b1413	ATP-dependent RNA helicase HrpA	4763752.0
	1			1			41	1599338	702	700	93	IS30_IS30	1599338	1600558.0	NC_000913.3_art_ISs	1598637.0	1599337.0		1600559.0	1601259.0							IS only present in query Strain.	2. Verify manually, possible false positive caused by consecutive ISs.		b1474	formate dehydrogenase N subunit alpha	-	Intergenic/Pseudo/Repeaed Region	-	-	-	-	4763752.0
	1			1			42	1601001	703	700	94	IS30_IS30	1601001	1602221.0	NC_000913.3_art_ISs	1600300.0	1601000.0		1602222.0	1602922.0	NC_000913.3	1470258.0	1470517.0				IS only present in query Strain.	2. Verify manually, possible false positive caused by consecutive ISs.		-	Intergenic/Pseudo/Repeaed Region	b1476	formate dehydrogenase N subunit gamma	b1404	IS30 transposase	-	-	4763752.0
1	1						43	1614176	704	700	38	IS30_IS30	1614176	1615396.0	NC_000913.3_art_ISs	1613475.0	1614175.0		1615397.0	1616097.0	NC_000913.3	1562193.0				1563594.0	IS only present in query Strain.	1. DLIS	Complete IS hit.	b1487	putative D;D-dipeptide ABC transporter periplasmic binding protein	b1489	oxygen-sensing c-di-GMP phosphodiesterase DosP	b1487	putative D;D-dipeptide ABC transporter periplasmic binding protein	b1489	oxygen-sensing c-di-GMP phosphodiesterase DosP	4763752.0
1	1						44	1700984	705	700	39	IS30_IS30	1700984	1702204.0	NC_000913.3_art_ISs	1700283.0	1700983.0		1702205.0	1702905.0	NC_000913.3	1647780.0				1649181.0	IS only present in query Strain.	1. DLIS	Complete IS hit.	b1569	Qin prophage; DNA-binding transcriptional regulator for DicB	-	Intergenic/Pseudo/Repeaed Region	b1569	Qin prophage; DNA-binding transcriptional regulator for DicB	-	Intergenic/Pseudo/Repeaed Region	4763752.0
1	1						45	1724977	706	700	40	IS30_IS30	1724977	1726197.0	NC_000913.3_art_ISs	1724276.0	1724976.0		1726198.0	1726898.0	NC_000913.3	1670552.0				1671953.0	IS only present in query Strain.	1. DLIS	Complete IS hit.	b1596	putative transporter YnfM	-	Intergenic/Pseudo/Repeaed Region	b1596	putative transporter YnfM	-	Intergenic/Pseudo/Repeaed Region	4763752.0
1	1						46	1739082	707	700	41	IS30_IS30	1739082	1740302.0	NC_000913.3_art_ISs	1738381.0	1739081.0		1740303.0	1741003.0	NC_000913.3	1683436.0				1684837.0	IS only present in query Strain.	1. DLIS	Complete IS hit.	-	Intergenic/Pseudo/Repeaed Region	b1610	DNA replication terminus site-binding protein	b1609	sensory histidine kinase RstB	b1610	DNA replication terminus site-binding protein	4763752.0
1	1						47	1744580	708	700	42	IS30_IS30	1744580	1745800.0	NC_000913.3_art_ISs	1743879.0	1744579.0		1745801.0	1746501.0	NC_000913.3	1687713.0				1689114.0	IS only present in query Strain.	1. DLIS	Complete IS hit.	b1612	fumarase A	b1613	mannose-6-phosphate isomerase	b1612	fumarase A	b1613	mannose-6-phosphate isomerase	4763752.0
1	1						48	1763370	709	700	43	IS30_IS30	1763370	1764590.0	NC_000913.3_art_ISs	1762669.0	1763369.0		1764591.0	1765291.0	NC_000913.3	1705282.0				1706683.0	IS only present in query Strain.	1. DLIS	Complete IS hit.	b1626	conserved inner membrane protein YdgK	b1628	SoxR [2Fe-2S] reducing system protein RsxB	b1626	conserved inner membrane protein YdgK	b1628	SoxR [2Fe-2S] reducing system protein RsxB	4763752.0
1	1						49	1767126	710	700	44	IS30_IS30	1767126	1768346.0	NC_000913.3_art_ISs	1766425.0	1767125.0		1768347.0	1769047.0	NC_000913.3	1707817.0				1709218.0	IS only present in query Strain.	1. DLIS	Complete IS hit.	-	Intergenic/Pseudo/Repeaed Region	b1630	SoxR [2Fe-2S] reducing system protein RsxD	b1629	SoxR [2Fe-2S] reducing system protein RsxC	b1630	SoxR [2Fe-2S] reducing system protein RsxD	4763752.0
1	1						50	1803050	711	700	45	IS30_IS30	1803050	1804270.0	NC_000913.3_art_ISs	1802349.0	1803049.0		1804271.0	1804971.0	NC_000913.3	1742520.0				1743921.0	IS only present in query Strain.	1. DLIS	Complete IS hit.	b1661	cyclopropane fatty acyl phospholipid synthase	b1663	multidrug efflux pump MdtK	b1661	cyclopropane fatty acyl phospholipid synthase	b1663	multidrug efflux pump MdtK	4763752.0
	1			1			51	1869279	712	700	95	IS30_IS30	1869279	1870499.0	NC_000913.3_art_ISs	1868578.0	1869278.0		1870500.0	1871200.0							IS only present in query Strain.	2. Verify manually, possible false positive caused by consecutive ISs.		b1724	protein YdiZ	-	Intergenic/Pseudo/Repeaed Region	-	-	-	-	4763752.0
	1			1			52	1870520	713	700	96	IS30_IS30	1870520	1871740.0	NC_000913.3_art_ISs	1869819.0	1870519.0		1871741.0	1872441.0							IS only present in query Strain.	2. Verify manually, possible false positive caused by consecutive ISs.		-	Intergenic/Pseudo/Repeaed Region	b1726	uncharacterized protein YniB	-	-	-	-	4763752.0
1	1						53	1904586	714	700	46	IS30_IS30	1904586	1905806.0	NC_000913.3_art_ISs	1903885.0	1904585.0		1905807.0	1906507.0	NC_000913.3	1840393.0				1841794.0	IS only present in query Strain.	1. DLIS	Complete IS hit.	b1757	molybdopterin synthase sulfurtransferase	b1759	5-hydroxy-CTP diphosphatase	b1757	molybdopterin synthase sulfurtransferase	b1759	5-hydroxy-CTP diphosphatase	4763752.0
1	1						54	1932848	715	700	47	IS30_IS30	1932848	1934068.0	NC_000913.3_art_ISs	1932147.0	1932847.0		1934069.0	1934769.0	NC_000913.3	1867434.0				1868835.0	IS only present in query Strain.	1. DLIS	Complete IS hit.	-	Intergenic/Pseudo/Repeaed Region	-	Intergenic/Pseudo/Repeaed Region	b1783	protein kinase YeaG	b1783	protein kinase YeaG	4763752.0
1	1						55	1937860	716	700	48	IS30_IS30	1937860	1939080.0	NC_000913.3_art_ISs	1937159.0	1937859.0		1939081.0	1939781.0	NC_000913.3	1871225.0				1872626.0	IS only present in query Strain.	1. DLIS	Complete IS hit.	b1785	putative c-di-GMP binding protein CdgI	b1786	putative diguanylate cyclase DgcJ	b1785	putative c-di-GMP binding protein CdgI	b1786	putative diguanylate cyclase DgcJ	4763752.0
1	1						56	2146825	717	700	49	IS30_IS30	2146825	2148045.0	NC_000913.3_art_ISs	2146124.0	2146824.0		2148046.0	2148746.0	NC_000913.3	2078969.0				2080370.0	IS only present in query Strain.	1. DLIS	Complete IS hit.	-	Intergenic/Pseudo/Repeaed Region	-	Intergenic/Pseudo/Repeaed Region	-	Intergenic/Pseudo/Repeaed Region	b2008	putative transporter YeeA	4763752.0
1	1						57	2291220	718	700	50	IS30_IS30	2291220	2292440.0	NC_000913.3_art_ISs	2290519.0	2291219.0		2292441.0	2293141.0	NC_000913.3	2222143.0				2223544.0	IS only present in query Strain.	1. DLIS	Complete IS hit.	-	Intergenic/Pseudo/Repeaed Region	-	Intergenic/Pseudo/Repeaed Region	-	Intergenic/Pseudo/Repeaed Region	b2133	D-lactate dehydrogenase	4763752.0
1	1						58	2302324	719	700	51	IS30_IS30	2302324	2303544.0	NC_000913.3_art_ISs	2301623.0	2302323.0		2303545.0	2304245.0	NC_000913.3	2232026.0				2233427.0	IS only present in query Strain.	1. DLIS	Complete IS hit.	-	Intergenic/Pseudo/Repeaed Region	b2144	DUF218 domain-containing protein SanA	b2143	cytidine/deoxycytidine deaminase	b2144	DUF218 domain-containing protein SanA	4763752.0
1	1						59	2305151	720	700	52	IS30_IS30	2305151	2306371.0	NC_000913.3_art_ISs	2304450.0	2305150.0		2306372.0	2307072.0	NC_000913.3	2233632.0				2235033.0	IS only present in query Strain.	1. DLIS	Complete IS hit.	b2145	DUF2542 domain-containing protein YeiS	-	Intergenic/Pseudo/Repeaed Region	b2145	DUF2542 domain-containing protein YeiS	b2146	NAD-dependent dihydropyrimidine dehydrogenase subunit PreT	4763752.0
	1			1			60	2314302	721	700	97	IS30_IS30	2314302	2315125.0	NC_000913.3_art_ISs	2313601.0	2314301.0		2315126.0	2315826.0							IS only present in query Strain.	2. Verify manually, possible false positive caused by consecutive ISs.	Partial IS hit.	b2151	DNA-binding transcriptional dual regulator GalS	-	Intergenic/Pseudo/Repeaed Region	-	-	-	-	4763752.0
	1			1			61	2315125	722	700	98	IS30_IS30	2315125	2315756.0	NC_000913.3_art_ISs	2314424.0	2315124.0		2315757.0	2316457.0							IS only present in query Strain.	2. Verify manually, possible false positive caused by consecutive ISs.	Partial IS hit.	-	Intergenic/Pseudo/Repeaed Region	-	Intergenic/Pseudo/Repeaed Region	-	-	-	-	4763752.0
	1			1			62	2315757	723	700	99	IS30_IS30	2315757	2316977.0	NC_000913.3_art_ISs	2315056.0	2315756.0		2316978.0	2317678.0							IS only present in query Strain.	2. Verify manually, possible false positive caused by consecutive ISs.		-	Intergenic/Pseudo/Repeaed Region	-	Intergenic/Pseudo/Repeaed Region	-	-	-	-	4763752.0
1	1						63	2331004	724	700	53	IS30_IS30	2331004	2332224.0	NC_000913.3_art_ISs	2330303.0	2331003.0		2332225.0	2332925.0	NC_000913.3	2254601.0				2256002.0	IS only present in query Strain.	1. DLIS	Complete IS hit.	b2162	pyrimidine-specific ribonucleoside hydrolase RihB	b2163	putative DNA-binding transcriptional regulator YeiL	b2162	pyrimidine-specific ribonucleoside hydrolase RihB	b2163	putative DNA-binding transcriptional regulator YeiL	4763752.0
1	1						64	2338335	725	700	54	IS30_IS30	2338335	2339555.0	NC_000913.3_art_ISs	2337634.0	2338334.0		2339556.0	2340256.0	NC_000913.3	2260711.0				2262112.0	IS only present in query Strain.	1. DLIS	Complete IS hit.	b2167	fructose-specific PTS multiphosphoryl transfer protein FruA	b2168	1-phosphofructokinase	b2167	fructose-specific PTS multiphosphoryl transfer protein FruA	b2168	1-phosphofructokinase	4763752.0
1	1						65	2415048	726	700	55	IS30_IS30	2415048	2416268.0	NC_000913.3_art_ISs	2414347.0	2415047.0		2416269.0	2416969.0	NC_000913.3	2336203.0				2337604.0	IS only present in query Strain.	1. DLIS	Complete IS hit.	b2230	DUF2138 domain-containing protein YfaA	-	Intergenic/Pseudo/Repeaed Region	b2230	DUF2138 domain-containing protein YfaA	b2231	DNA gyrase subunit A	4763752.0
1	1						66	2462961	727	700	56	IS30_IS30	2462961	2464181.0	NC_000913.3_art_ISs	2462260.0	2462960.0		2464182.0	2464882.0	NC_000913.3	2382895.0				2384296.0	IS only present in query Strain.	1. DLIS	Complete IS hit.	-	Intergenic/Pseudo/Repeaed Region	b2270	IPR002035/DUF3520 domain-containing protein YfbK	b2269	protease ElaD	b2270	IPR002035/DUF3520 domain-containing protein YfbK	4763752.0
1	1						67	2528130	728	700	57	IS30_IS30	2528130	2529350.0	NC_000913.3_art_ISs	2527429.0	2528129.0		2529351.0	2530051.0	NC_000913.3	2446843.0				2448244.0	IS only present in query Strain.	1. DLIS	Complete IS hit.	b2329	chorismate synthase	-	Intergenic/Pseudo/Repeaed Region	b2329	chorismate synthase	b2330	50S ribosomal subunit protein L3 N(5)-glutamine methyltransferase	4763752.0
1	1						68	2951446	729	700	58	IS30_IS30	2951446	2952666.0	NC_000913.3_art_ISs	2950745.0	2951445.0		2952667.0	2953367.0	NC_000913.3	2868938.0				2870339.0	IS only present in query Strain.	1. DLIS	Complete IS hit.	b2743	L-isoaspartate protein carboxylmethyltransferase type II	b2745	tRNA pseudouridine(13) synthase	b2743	L-isoaspartate protein carboxylmethyltransferase type II	b2745	tRNA pseudouridine(13) synthase	4763752.0
1	1						69	2954441	730	700	59	IS30_IS30	2954441	2955661.0	NC_000913.3_art_ISs	2953740.0	2954440.0		2955662.0	2956362.0	NC_000913.3	2870712.0				2872113.0	IS only present in query Strain.	1. DLIS	Complete IS hit.	b2745	tRNA pseudouridine(13) synthase	b2747	2-C-methyl-D-erythritol 4-phosphate cytidylyltransferase	b2745	tRNA pseudouridine(13) synthase	b2747	2-C-methyl-D-erythritol 4-phosphate cytidylyltransferase	4763752.0
1	1						70	2983613	731	700	60	IS30_IS30	2983613	2984833.0	NC_000913.3_art_ISs	2982912.0	2983612.0		2984834.0	2985534.0	NC_000913.3	2898663.0				2900064.0	IS only present in query Strain.	1. DLIS	Complete IS hit.	-	Intergenic/Pseudo/Repeaed Region	b2774	putative deoxygluconate dehydrogenase	b4463	putative FAD-containing dehydrogenase	b2774	putative deoxygluconate dehydrogenase	4763752.0
1	1						71	3057300	732	700	61	IS30_IS30	3057300	3058520.0	NC_000913.3_art_ISs	3056599.0	3057299.0		3058521.0	3059221.0	NC_000913.3	2971129.0				2972530.0	IS only present in query Strain.	1. DLIS	Complete IS hit.	b2832	UPF0053 inner membrane protein YgdQ	-	Intergenic/Pseudo/Repeaed Region	b2832	UPF0053 inner membrane protein YgdQ	b2834	putative NADP(H)-dependent aldo-keto reductase Tas	4763752.0
1	1						72	3104435	733	700	62	IS30_IS30	3104435	3105655.0	NC_000913.3_art_ISs	3103734.0	3104434.0		3105656.0	3106356.0	NC_000913.3	3017043.0				3018444.0	IS only present in query Strain.	1. DLIS	Complete IS hit.	-	Intergenic/Pseudo/Repeaed Region	-	Intergenic/Pseudo/Repeaed Region	b2878	putative oxidoreductase; Fe-S subunit	b2878	putative oxidoreductase; Fe-S subunit	4763752.0
1	1						73	3137784	734	700	63	IS30_IS30	3137784	3139004.0	NC_000913.3_art_ISs	3137083.0	3137783.0		3139005.0	3139705.0	NC_000913.3	3049171.0				3050572.0	IS only present in query Strain.	1. DLIS	Complete IS hit.	b2904	glycine cleavage system H protein	-	Intergenic/Pseudo/Repeaed Region	b2904	glycine cleavage system H protein	b2905	aminomethyltransferase	4763752.0
1	1						74	3161238	735	700	64	IS30_IS30	3161238	3162458.0	NC_000913.3_art_ISs	3160537.0	3161237.0		3162459.0	3163159.0	NC_000913.3	3071404.0				3072805.0	IS only present in query Strain.	1. DLIS	Complete IS hit.	-	Intergenic/Pseudo/Repeaed Region	b2927	D-erythrose-4-phosphate dehydrogenase	-	Intergenic/Pseudo/Repeaed Region	b2927	D-erythrose-4-phosphate dehydrogenase	4763752.0
1	1						75	3226249	736	700	65	IS30_IS30	3226249	3227469.0	NC_000913.3_art_ISs	3225548.0	3226248.0		3227470.0	3228170.0	NC_000913.3	3135194.0				3136595.0	IS only present in query Strain.	1. DLIS	Complete IS hit.	-	Intergenic/Pseudo/Repeaed Region	-	Intergenic/Pseudo/Repeaed Region	b2987	metal phosphate:H(+) symporter PitB	-	Intergenic/Pseudo/Repeaed Region	4763752.0
1	1						76	3361527	737	700	66	IS30_IS30	3361527	3362747.0	NC_000913.3_art_ISs	3360826.0	3361526.0		3362748.0	3363448.0	NC_000913.3	3269251.0				3270652.0	IS only present in query Strain.	1. DLIS	Complete IS hit.	b3121	uncharacterized protein YhaC	b3124	glycerate 2-kinase 1	b3121	uncharacterized protein YhaC	b3124	glycerate 2-kinase 1	4763752.0
1	1						77	3386688	738	700	67	IS30_IS30	3386688	3387908.0	NC_000913.3_art_ISs	3385987.0	3386687.0		3387909.0	3388609.0	NC_000913.3	3293191.0				3294592.0	IS only present in query Strain.	1. DLIS	Complete IS hit.	b3146	16S rRNA 2'-O-ribose C1402 methyltransferase	-	Intergenic/Pseudo/Repeaed Region	b3146	16S rRNA 2'-O-ribose C1402 methyltransferase	b3147	outer membrane lipoprotein - activator of MrcA activity	4763752.0
1	1						78	3441448	739	700	68	IS30_IS30	3441448	3442668.0	NC_000913.3_art_ISs	3440747.0	3441447.0		3442669.0	3443369.0	NC_000913.3	3346730.0				3348131.0	IS only present in query Strain.	1. DLIS	Complete IS hit.	b3204	phosphotransferase system enzyme IIA(Ntr)	b3206	phosphorelay protein Npr	b3204	phosphotransferase system enzyme IIA(Ntr)	b3206	phosphorelay protein Npr	4763752.0
1	1						79	3596382	740	700	69	IS30_IS30	3596382	3597602.0	NC_000913.3_art_ISs	3595681.0	3596381.0		3597603.0	3598303.0	NC_000913.3	3500443.0				3501844.0	IS only present in query Strain.	1. DLIS	Complete IS hit.	-	Intergenic/Pseudo/Repeaed Region	b3371	fructoselysine 6-phosphate deglycase	b3370	fructoselysine/psicoselysine transporter	b3371	fructoselysine 6-phosphate deglycase	4763752.0
1	1						80	3615538	741	700	70	IS30_IS30	3615538	3616758.0	NC_000913.3_art_ISs	3614837.0	3615537.0		3616759.0	3617459.0	NC_000913.3	3518378.0				3519779.0	IS only present in query Strain.	1. DLIS	Complete IS hit.	b3389	3-dehydroquinate synthase	-	Intergenic/Pseudo/Repeaed Region	b3389	3-dehydroquinate synthase	b3391	DNA utilization protein HofQ	4763752.0
1	1						81	3617769	742	700	71	IS30_IS30	3617769	3618989.0	NC_000913.3_art_ISs	3617068.0	3617768.0		3618990.0	3619690.0	NC_000913.3	3519388.0				3520789.0	IS only present in query Strain.	1. DLIS	Complete IS hit.	-	Intergenic/Pseudo/Repeaed Region	b3392	DNA utilization protein HofP	-	Intergenic/Pseudo/Repeaed Region	b3392	DNA utilization protein HofP	4763752.0
1	1						82	3654946	743	700	72	IS30_IS30	3654946	3656166.0	NC_000913.3_art_ISs	3654245.0	3654945.0		3656167.0	3656867.0	NC_000913.3	3555344.0				3556745.0	IS only present in query Strain.	1. DLIS	Complete IS hit.	b3418	DNA-binding transcriptional activator MalT	-	Intergenic/Pseudo/Repeaed Region	b3418	DNA-binding transcriptional activator MalT	b4475	RNA 3'-terminal phosphate cyclase	4763752.0
1	1						83	3658126	744	700	73	IS30_IS30	3658126	3659346.0	NC_000913.3_art_ISs	3657425.0	3658125.0		3659347.0	3660047.0	NC_000913.3	3557303.0				3558704.0	IS only present in query Strain.	1. DLIS	Complete IS hit.	-	Intergenic/Pseudo/Repeaed Region	b3422	DNA-binding transcriptional activator RtcR	b3421	RNA-splicing ligase	b3422	DNA-binding transcriptional activator RtcR	4763752.0
1	1						84	3727323	745	700	74	IS30_IS30	3727323	3728543.0	NC_000913.3_art_ISs	3726622.0	3727322.0		3728544.0	3729244.0	NC_000913.3	3625279.0				3626680.0	IS only present in query Strain.	1. DLIS	Complete IS hit.	b3484	putative transposase	-	Intergenic/Pseudo/Repeaed Region	b3484	putative transposase	b3485	ABC transporter family protein YhhJ	4763752.0
1	1						85	3766127	746	700	75	IS30_IS30	3766127	3767347.0	NC_000913.3_art_ISs	3765426.0	3766126.0		3767348.0	3768048.0	NC_000913.3	3662862.0				3664263.0	IS only present in query Strain.	1. DLIS	Complete IS hit.	b3514	multidrug efflux pump RND permease MdtF	b3515	DNA-binding transcriptional dual regulator GadW	b3514	multidrug efflux pump RND permease MdtF	b3515	DNA-binding transcriptional dual regulator GadW	4763752.0
1	1						86	3798695	747	700	76	IS30_IS30	3798695	3799915.0	NC_000913.3_art_ISs	3797994.0	3798694.0		3799916.0	3800616.0	NC_000913.3	3694209.0				3695610.0	IS only present in query Strain.	1. DLIS	Complete IS hit.	-	Intergenic/Pseudo/Repeaed Region	b3534	cellulose biosynthesis protein	b3533	cellulose synthase catalytic subunit	b3534	cellulose biosynthesis protein	4763752.0
1	1						87	3900620	748	700	77	IS30_IS30	3900620	3901840.0	NC_000913.3_art_ISs	3899919.0	3900619.0		3901841.0	3902541.0	NC_000913.3	3794913.0				3796314.0	IS only present in query Strain.	1. DLIS	Complete IS hit.	b3619	ADP-L-glycero-D-mannoheptose 6-epimerase	b3621	ADP-heptose:LPS heptosyltransferase 1	b3619	ADP-L-glycero-D-mannoheptose 6-epimerase	b3621	ADP-heptose:LPS heptosyltransferase 1	4763752.0
1	1						88	4006509	749	700	78	IS30_IS30	4006509	4007729.0	NC_000913.3_art_ISs	4005808.0	4006508.0		4007730.0	4008430.0	NC_000913.3	3899581.0				3900982.0	IS only present in query Strain.	1. DLIS	Complete IS hit.	-	Intergenic/Pseudo/Repeaed Region	b3720	carbohydrate-specific outer membrane porin; cryptic	b3719	putative hydrolase YieL	b3720	carbohydrate-specific outer membrane porin; cryptic	4763752.0
1	1						89	4013286	750	700	79	IS30_IS30	4013286	4014506.0	NC_000913.3_art_ISs	4012585.0	4013285.0		4014507.0	4015207.0	NC_000913.3	3905137.0				3906538.0	IS only present in query Strain.	1. DLIS	Complete IS hit.	b3722	beta-glucoside specific PTS enzyme II/BglG kinase/BglG phosphatase	-	Intergenic/Pseudo/Repeaed Region	b3722	beta-glucoside specific PTS enzyme II/BglG kinase/BglG phosphatase	b3723	transcriptional antiterminator BglG	4763752.0
1	1						90	4027534	751	700	80	IS30_IS30	4027534	4028754.0	NC_000913.3_art_ISs	4026833.0	4027533.0		4028755.0	4029455.0	NC_000913.3	3918164.0				3919565.0	IS only present in query Strain.	1. DLIS	Complete IS hit.	b3733	ATP synthase F1 complex subunit gamma	-	Intergenic/Pseudo/Repeaed Region	b3733	ATP synthase F1 complex subunit gamma	b3734	ATP synthase F1 complex subunit alpha	4763752.0
1	1						91	4248889	752	700	81	IS30_IS30	4248889	4250109.0	NC_000913.3_art_ISs	4248188.0	4248888.0		4250110.0	4250810.0	NC_000913.3	4138298.0				4139699.0	IS only present in query Strain.	1. DLIS	Complete IS hit.	-	Intergenic/Pseudo/Repeaed Region	b3946	fructose-6-phosphate aldolase 2	b3945	L-1;2-propanediol dehydrogenase/glycerol dehydrogenase	b3946	fructose-6-phosphate aldolase 2	4763752.0
1	1						92	4260696	753	700	82	IS30_IS30	4260696	4261916.0	NC_000913.3_art_ISs	4259995.0	4260695.0		4261917.0	4262617.0	NC_000913.3	4148884.0				4150285.0	IS only present in query Strain.	1. DLIS	Complete IS hit.	-	Intergenic/Pseudo/Repeaed Region	-	Intergenic/Pseudo/Repeaed Region	b3955	phosphoethanolamine transferase EptC	-	Intergenic/Pseudo/Repeaed Region	4763752.0
1	1						93	4264502	754	700	83	IS30_IS30	4264502	4265722.0	NC_000913.3_art_ISs	4263801.0	4264501.0		4265723.0	4266423.0	NC_000913.3	4151469.0				4152870.0	IS only present in query Strain.	1. DLIS	Complete IS hit.	-	Intergenic/Pseudo/Repeaed Region	-	Intergenic/Pseudo/Repeaed Region	b3956	phosphoenolpyruvate carboxylase	b3956	phosphoenolpyruvate carboxylase	4763752.0
1	1						94	4311821	755	700	84	IS30_IS30	4311821	4313041.0	NC_000913.3_art_ISs	4311120.0	4311820.0		4313042.0	4313742.0	NC_000913.3	4197567.0				4198968.0	IS only present in query Strain.	1. DLIS	Complete IS hit.	b3996	NADH pyrophosphatase	b3998	endonuclease V	b3996	NADH pyrophosphatase	b3998	endonuclease V	4763752.0
1	1						95	4389275	756	700	85	IS30_IS30	4389275	4390495.0	NC_000913.3_art_ISs	4388574.0	4389274.0		4390496.0	4391196.0	NC_000913.3	4273800.0				4275201.0	IS only present in query Strain.	1. DLIS	Complete IS hit.	b4058	excision nuclease subunit A	-	Intergenic/Pseudo/Repeaed Region	b4058	excision nuclease subunit A	-	Intergenic/Pseudo/Repeaed Region	4763752.0
1	1						96	4434397	757	700	86	IS30_IS30	4434397	4435617.0	NC_000913.3_art_ISs	4433696.0	4434396.0		4435618.0	4436318.0	NC_000913.3	4317701.0				4319102.0	IS only present in query Strain.	1. DLIS	Complete IS hit.	b4096	methylphosphonate degradation complex subunit PhnL	b4098	carbon-phosphorus lyase core complex subunit PhnJ	b4096	methylphosphonate degradation complex subunit PhnL	b4098	carbon-phosphorus lyase core complex subunit PhnJ	4763752.0
	1			1			97	4461112	758	700	102	IS30_IS30	4461112	4461482.0	NC_000913.3_art_ISs	4460411.0	4461111.0		4461483.0	4462183.0							IS only present in query Strain.	2. Verify manually, possible false positive caused by consecutive ISs.	Partial IS hit.	b4119	alpha-galactosidase	-	Intergenic/Pseudo/Repeaed Region	-	-	-	-	4763752.0
	1			1			98	4461481	759	700	103	IS30_IS30	4461481	4462701.0	NC_000913.3_art_ISs	4460780.0	4461480.0		4462702.0	4463402.0							IS only present in query Strain.	2. Verify manually, possible false positive caused by consecutive ISs.		-	Intergenic/Pseudo/Repeaed Region	-	Intergenic/Pseudo/Repeaed Region	-	-	-	-	4763752.0
1	1						99	4509587	760	700	87	IS30_IS30	4509587	4510807.0	NC_000913.3_art_ISs	4508886.0	4509586.0		4510808.0	4511508.0	NC_000913.3	4389228.0				4390629.0	IS only present in query Strain.	1. DLIS	Complete IS hit.	b4159	miniconductance mechanosensitive channel MscM	b4161	ribosome small subunit-dependent GTPase A	b4159	miniconductance mechanosensitive channel MscM	b4161	ribosome small subunit-dependent GTPase A	4763752.0
1	1						100	4524761	761	700	88	IS30_IS30	4524761	4525981.0	NC_000913.3_art_ISs	4524060.0	4524760.0		4525982.0	4526682.0	NC_000913.3	4403181.0				4404582.0	IS only present in query Strain.	1. DLIS	Complete IS hit.	b4174	regulator of FtsH protease	b4176	DUF2065 domain-containing protein YjeT	b4174	regulator of FtsH protease	b4176	DUF2065 domain-containing protein YjeT	4763752.0
			1						762	700	90	IS30_IS30	249701	250822.0	NC_000913.3_art_ISs	249000.0	249700.0		250823.0	251523.0							IS only present in query Strain.	2. Verify manually, possible false positive caused by consecutive ISs.	Partial IS hit.	-	Intergenic/Pseudo/Repeaed Region	-	Intergenic/Pseudo/Repeaed Region	-	-	-	-	4763752.0
			1						763	700	91	ISEc1_ISAs1	736682	737971.0	NC_000913.3_art_ISs	762843.0				764267.0	NC_000913.3	735981.0	736681.0		737972.0	738672.0	IS only present in ref Strain.	2. Verify manually, possible false positive caused by consecutive ISs.	Complete IS hit.	b0704	uncharacterized protein YbfC	b0705	putative transposase YbfL	b0681	chitobiose outer membrane channel	b0684	flavodoxin 1	4641652.0
			1						764	700	92	ISEc1_ISAs1	763544	764833.0	NC_000913.3_art_ISs	762843.0	763543.0		764834.0	765534.0	NC_000913.3	735981.0				737405.0	IS only present in query Strain.	2. Verify manually, possible false positive caused by consecutive ISs.	Complete IS hit.	b0704	uncharacterized protein YbfC	b0706	H repeat-associated putative transposase YbfD	b0704	uncharacterized protein YbfC	b0705	putative transposase YbfL	4763752.0
			1						765	700	100	IS30_IS30	2316971	2317566.0	NC_000913.3_art_ISs	2316270.0	2316970.0		2317567.0	2318267.0							IS only present in query Strain.	2. Verify manually, possible false positive caused by consecutive ISs.	Partial IS hit.	-	Intergenic/Pseudo/Repeaed Region	-	Intergenic/Pseudo/Repeaed Region	-	-	-	-	4763752.0
			1						766	700	101	IS30_IS30	2317567	2317964.0	NC_000913.3_art_ISs	2316866.0	2317566.0		2317965.0	2318665.0							IS only present in query Strain.	2. Verify manually, possible false positive caused by consecutive ISs.	Partial IS hit.	-	Intergenic/Pseudo/Repeaed Region	-	Intergenic/Pseudo/Repeaed Region	-	-	-	-	4763752.0
			1						767	700	104	IS30_IS30	4462702	4463553.0	NC_000913.3_art_ISs	4462001.0	4462701.0		4463554.0	4464254.0							IS only present in query Strain.	2. Verify manually, possible false positive caused by consecutive ISs.	Partial IS hit.	-	Intergenic/Pseudo/Repeaed Region	-	Intergenic/Pseudo/Repeaed Region	-	-	-	-	4763752.0
			1						768	700	105	IS2_IS2_IS3	399833	400905.0	NC_000913.3_art_ISs	399132.0	399832.0		400906.0	401606.0							IS only present in query Strain.	5. Discarded for analysis. There were multiple blastn hits, and left and right pairs could not be determined.	Partial IS hit.	-	Intergenic/Pseudo/Repeaed Region	b0363	putative glucosyltransferase	-	-	-	-	4763752.0
			1						769	700	106	ISEc1_ISAs1	3624234	3625524.0	NC_000913.3_art_ISs	3726868.0	3727322.0				NC_000913.3	3623533.0	3624233.0		3625525.0	3626225.0	IS only present in ref Strain.	5. Discarded for analysis. There were multiple blastn hits, and left and right pairs could not be determined.		-	Intergenic/Pseudo/Repeaed Region	-	-	b3396	peptidoglycan glycosyltransferase/peptidoglycan DD-transpeptidase MrcA	b3398	inner membrane protein - inhibits the Rcs signaling pathway	4641652.0
			1						770	700	107	ISEc1_ISAs1	3725577	3726867.0	NC_000913.3_art_ISs	3724876.0	3725576.0		3726868.0	3727568.0	NC_000913.3	3625525.0	3625979.0				IS only present in query Strain.	5. Discarded for analysis. There were multiple blastn hits, and left and right pairs could not be determined.		b3483	PF15631 family protein YhhH	-	Intergenic/Pseudo/Repeaed Region	b3485	ABC transporter family protein YhhJ	-	-	4763752.0
89	99	0	9	11	1	*			771	700
1	1						1	446	772	800	0	IS30_IS30	446	1666.0	NC_000913.3_art_ISs	1.0	445.0		1667.0	2467.0	NC_000913.3	1.0				1246.0	IS only present in query Strain.	1. DLIS	Complete IS hit.	-	Intergenic/Pseudo/Repeaed Region	-	Intergenic/Pseudo/Repeaed Region	-	Intergenic/Pseudo/Repeaed Region	b0002	fused aspartate kinase/homoserine dehydrogenase 1	4763752.0
1	1						2	3160	773	800	1	IS30_IS30	3160	4380.0	NC_000913.3_art_ISs	2359.0	3159.0		4381.0	5181.0	NC_000913.3	1138.0				2739.0	IS only present in query Strain.	1. DLIS	Complete IS hit.	-	Intergenic/Pseudo/Repeaed Region	-	Intergenic/Pseudo/Repeaed Region	b0002	fused aspartate kinase/homoserine dehydrogenase 1	b0002	fused aspartate kinase/homoserine dehydrogenase 1	4763752.0
1	1						3	123711	774	800	2	IS30_IS30	123711	124931.0	NC_000913.3_art_ISs	122910.0	123710.0		124932.0	125732.0	NC_000913.3	120468.0				122069.0	IS only present in query Strain.	1. DLIS	Complete IS hit.	-	Intergenic/Pseudo/Repeaed Region	-	Intergenic/Pseudo/Repeaed Region	b0112	aromatic amino acid:H(+) symporter AroP	-	Intergenic/Pseudo/Repeaed Region	4763752.0
1	1						4	142989	775	800	3	IS30_IS30	142989	144209.0	NC_000913.3_art_ISs	142188.0	142988.0		144210.0	145010.0	NC_000913.3	138525.0				140126.0	IS only present in query Strain.	1. DLIS	Complete IS hit.	b0123	cuprous oxidase/multicopper oxidase with role in copper homeostasis	-	Intergenic/Pseudo/Repeaed Region	b0123	cuprous oxidase/multicopper oxidase with role in copper homeostasis	b0124	quinoprotein glucose dehydrogenase	4763752.0
1	1						5	163498	776	800	4	IS30_IS30	163498	164718.0	NC_000913.3_art_ISs	162697.0	163497.0		164719.0	165519.0	NC_000913.3	157813.0				159414.0	IS only present in query Strain.	1. DLIS	Complete IS hit.	-	Intergenic/Pseudo/Repeaed Region	b0144	glutamyl-Q tRNA(Asp) synthetase	b0143	poly(A) polymerase I	b0144	glutamyl-Q tRNA(Asp) synthetase	4763752.0
1	1						6	240046	777	800	5	IS30_IS30	240046	241266.0	NC_000913.3_art_ISs	239245.0	240045.0		241267.0	242067.0	NC_000913.3	233140.0				234741.0	IS only present in query Strain.	1. DLIS	Complete IS hit.	-	Intergenic/Pseudo/Repeaed Region	b0212	hydroxyacylglutathione hydrolase GloB	b0211	membrane-bound lytic murein transglycosylase D	b0212	hydroxyacylglutathione hydrolase GloB	4763752.0
				1	1		7	248381	778	800
	1			1			8	248480	779	800	89	IS30_IS30	248480	249700.0	NC_000913.3_art_ISs	247679.0	248479.0		249701.0	250501.0							IS only present in query Strain.	2. Verify manually, possible false positive caused by consecutive ISs.		b0220	periplasmic chaperone; inhibitor of vertebrate C-type lysozyme	-	Intergenic/Pseudo/Repeaed Region	-	-	-	-	4763752.0
1	1						9	310515	780	800	6	IS30_IS30	310515	311735.0	NC_000913.3_art_ISs	309714.0	310514.0		311736.0	312536.0	NC_000913.3	299946.0				301547.0	IS only present in query Strain.	1. DLIS	Complete IS hit.	-	Intergenic/Pseudo/Repeaed Region	b0285	aldehyde dehydrogenase; FAD-binding subunit	b0284	aldehyde dehydrogenase: molybdenum cofactor-binding subunit	b0285	aldehyde dehydrogenase; FAD-binding subunit	4763752.0
1	1						10	315801	781	800	7	IS30_IS30	315801	317021.0	NC_000913.3_art_ISs	315000.0	315800.0		317022.0	317822.0	NC_000913.3	304011.0				305612.0	IS only present in query Strain.	1. DLIS	Complete IS hit.	b0288	putative zinc- or iron-chelating domain-containing protein YkgJ	b0290	fimbrial adhesin EcpD	b0288	putative zinc- or iron-chelating domain-containing protein YkgJ	b0290	fimbrial adhesin EcpD	4763752.0
1	1						11	333734	782	800	8	IS30_IS30	333734	334954.0	NC_000913.3_art_ISs	332933.0	333733.0		334955.0	335755.0	NC_000913.3	320723.0				322324.0	IS only present in query Strain.	1. DLIS	Complete IS hit.	b0305	DNA-binding transcriptional activator RclR	b0306	putative lactate utilization oxidoreductase YkgE	b0305	DNA-binding transcriptional activator RclR	b0306	putative lactate utilization oxidoreductase YkgE	4763752.0
1	1						12	356194	783	800	9	IS30_IS30	356194	357414.0	NC_000913.3_art_ISs	355393.0	356193.0		357415.0	358215.0	NC_000913.3	341962.0				343563.0	IS only present in query Strain.	1. DLIS	Complete IS hit.	b0324	putative deaminase with metallo-dependent hydrolase domain	b0325	aldehyde reductase; NADPH-dependent	b0324	putative deaminase with metallo-dependent hydrolase domain	b0325	aldehyde reductase; NADPH-dependent	4763752.0
1	1						13	361260	784	800	10	IS30_IS30	361260	362480.0	NC_000913.3_art_ISs	360459.0	361259.0		362481.0	363281.0	NC_000913.3	345807.0				347408.0	IS only present in query Strain.	1. DLIS	Complete IS hit.	b0328	putative amino acid exporter	b0330	DNA-binding transcriptional dual regulator PrpR	b0328	putative amino acid exporter	b0330	DNA-binding transcriptional dual regulator PrpR	4763752.0
1	1						14	395877	785	800	11	IS30_IS30	395877	397097.0	NC_000913.3_art_ISs	395076.0	395876.0		397098.0	397898.0	NC_000913.3	379203.0				380804.0	IS only present in query Strain.	1. DLIS	Complete IS hit.	b0356	S-(hydroxymethyl)glutathione dehydrogenase	b0358	outer membrane protein YaiO	b0356	S-(hydroxymethyl)glutathione dehydrogenase	b0358	outer membrane protein YaiO	4763752.0
1	1						15	398612	786	800	12	IS30_IS30	398612	399832.0	NC_000913.3_art_ISs	397811.0	398611.0		399833.0	400633.0	NC_000913.3	380717.0				382318.0	IS only present in query Strain.	1. DLIS	Complete IS hit.	b0358	outer membrane protein YaiO	b0361	IS2 element protein	b0358	outer membrane protein YaiO	b0361	IS2 element protein	4763752.0
1	1						16	458588	787	800	13	IS30_IS30	458588	459808.0	NC_000913.3_art_ISs	457787.0	458587.0		459809.0	460609.0	NC_000913.3	439472.0				441073.0	IS only present in query Strain.	1. DLIS	Complete IS hit.	b0420	1-deoxy-D-xylulose-5-phosphate synthase	-	Intergenic/Pseudo/Repeaed Region	b0420	1-deoxy-D-xylulose-5-phosphate synthase	b0421	geranyl diphosphate/farnesyl diphosphate synthase	4763752.0
1	1						17	515332	788	800	14	IS30_IS30	515332	516552.0	NC_000913.3_art_ISs	514531.0	515331.0		516553.0	517353.0	NC_000913.3	494995.0				496596.0	IS only present in query Strain.	1. DLIS	Complete IS hit.	b0472	DNA repair protein RecR	-	Intergenic/Pseudo/Repeaed Region	b0472	DNA repair protein RecR	b0473	chaperone protein HtpG	4763752.0
1	1						18	518331	789	800	15	IS30_IS30	518331	519551.0	NC_000913.3_art_ISs	517530.0	518330.0		519552.0	520352.0	NC_000913.3	496773.0				498374.0	IS only present in query Strain.	1. DLIS	Complete IS hit.	-	Intergenic/Pseudo/Repeaed Region	b0475	ferrochelatase	b0473	chaperone protein HtpG	b0475	ferrochelatase	4763752.0
1	1						19	564278	790	800	16	IS30_IS30	564278	565498.0	NC_000913.3_art_ISs	563477.0	564277.0		565499.0	566299.0	NC_000913.3	541499.0				543100.0	IS only present in query Strain.	1. DLIS	Complete IS hit.	b0513	putative purine transporter	-	Intergenic/Pseudo/Repeaed Region	b0513	putative purine transporter	-	Intergenic/Pseudo/Repeaed Region	4763752.0
1	1						20	638410	791	800	17	IS30_IS30	638410	639630.0	NC_000913.3_art_ISs	637609.0	638409.0		639631.0	640431.0	NC_000913.3	614410.0				616011.0	IS only present in query Strain.	1. DLIS	Complete IS hit.	-	Intergenic/Pseudo/Repeaed Region	-	Intergenic/Pseudo/Repeaed Region	b0586	apo-serine activating enzyme	b0586	apo-serine activating enzyme	4763752.0
1	1						21	643571	792	800	18	IS30_IS30	643571	644791.0	NC_000913.3_art_ISs	642770.0	643570.0		644792.0	645592.0	NC_000913.3	618350.0				619951.0	IS only present in query Strain.	1. DLIS	Complete IS hit.	-	Intergenic/Pseudo/Repeaed Region	b0588	ferric enterobactin ABC transporter ATP binding subunit	b0587	polysaccharide co-polymerase family protein FepE	b0588	ferric enterobactin ABC transporter ATP binding subunit	4763752.0
1	1						22	709250	793	800	19	IS30_IS30	709250	710470.0	NC_000913.3_art_ISs	708449.0	709249.0		710471.0	711271.0	NC_000913.3	682808.0				684409.0	IS only present in query Strain.	1. DLIS	Complete IS hit.	b0650	chaperone protein HscC	-	Intergenic/Pseudo/Repeaed Region	b0650	chaperone protein HscC	b0651	pyrimidine-specific ribonucleoside hydrolase RihA	4763752.0
1	1						23	780879	794	800	20	IS30_IS30	780879	782099.0	NC_000913.3_art_ISs	780078.0	780878.0		782100.0	782900.0	NC_000913.3	753216.0				754817.0	IS only present in query Strain.	1. DLIS	Complete IS hit.	-	Intergenic/Pseudo/Repeaed Region	-	Intergenic/Pseudo/Repeaed Region	b0720	citrate synthase	-	Intergenic/Pseudo/Repeaed Region	4763752.0
1	1						24	794533	795	800	21	IS30_IS30	794533	795753.0	NC_000913.3_art_ISs	793732.0	794532.0		795754.0	796554.0	NC_000913.3	765649.0				767250.0	IS only present in query Strain.	1. DLIS	Complete IS hit.	b0730	DNA-binding transcriptional repressor MngR	-	Intergenic/Pseudo/Repeaed Region	b0730	DNA-binding transcriptional repressor MngR	b0731	2-O-alpha-mannosyl-D-glycerate specific PTS enzyme II	4763752.0
1	1						25	818746	796	800	22	IS30_IS30	818746	819966.0	NC_000913.3_art_ISs	817945.0	818745.0		819967.0	820767.0	NC_000913.3	788641.0				790242.0	IS only present in query Strain.	1. DLIS	Complete IS hit.	b0756	galactose-1-epimerase	b0758	galactose-1-phosphate uridylyltransferase	b0756	galactose-1-epimerase	b0758	galactose-1-phosphate uridylyltransferase	4763752.0
1	1						26	827842	797	800	23	IS30_IS30	827842	829062.0	NC_000913.3_art_ISs	827041.0	827841.0		829063.0	829863.0	NC_000913.3	796516.0				798117.0	IS only present in query Strain.	1. DLIS	Complete IS hit.	b0764	molybdate ABC transporter membrane subunit	b0766	pyridoxal phosphate/fructose-1;6-bisphosphate phosphatase	b0764	molybdate ABC transporter membrane subunit	b0766	pyridoxal phosphate/fructose-1;6-bisphosphate phosphatase	4763752.0
1	1						27	840349	798	800	24	IS30_IS30	840349	841569.0	NC_000913.3_art_ISs	839548.0	840348.0		841570.0	842370.0	NC_000913.3	807802.0				809403.0	IS only present in query Strain.	1. DLIS	Complete IS hit.	b0773	putative kinase inhibitor	b0775	biotin synthase	b0773	putative kinase inhibitor	b0775	biotin synthase	4763752.0
1	1						28	866245	799	800	25	IS30_IS30	866245	867465.0	NC_000913.3_art_ISs	865444.0	866244.0		867466.0	868266.0	NC_000913.3	832477.0				834078.0	IS only present in query Strain.	1. DLIS	Complete IS hit.	b0798	N-glycosidase YbiA	-	Intergenic/Pseudo/Repeaed Region	b0798	N-glycosidase YbiA	b0799	ATP-dependent DNA helicase DinG	4763752.0
1	1						29	885800	800	800	26	IS30_IS30	885800	887020.0	NC_000913.3_art_ISs	884999.0	885799.0		887021.0	887821.0	NC_000913.3	850811.0				852412.0	IS only present in query Strain.	1. DLIS	Complete IS hit.	b0814	outer membrane protein X	-	Intergenic/Pseudo/Repeaed Region	b0814	outer membrane protein X	b0815	phosphoethanolamine transferase	4763752.0
1	1						30	1054897	801	800	27	IS30_IS30	1054897	1056117.0	NC_000913.3_art_ISs	1054096.0	1054896.0		1056118.0	1056918.0	NC_000913.3	1018687.0				1020288.0	IS only present in query Strain.	1. DLIS	Complete IS hit.	b0956	macrodomain Ter protein	-	Intergenic/Pseudo/Repeaed Region	b0956	macrodomain Ter protein	-	Intergenic/Pseudo/Repeaed Region	4763752.0
1	1						31	1102873	802	800	28	IS30_IS30	1102873	1104093.0	NC_000913.3_art_ISs	1102072.0	1102872.0		1104094.0	1104894.0	NC_000913.3	1065442.0				1067043.0	IS only present in query Strain.	1. DLIS	Complete IS hit.	-	Intergenic/Pseudo/Repeaed Region	b1003	PF13993 family protein YccJ	-	Intergenic/Pseudo/Repeaed Region	b1003	PF13993 family protein YccJ	4763752.0
1	1						32	1118119	803	800	29	IS30_IS30	1118119	1119339.0	NC_000913.3_art_ISs	1117318.0	1118118.0		1119340.0	1120140.0	NC_000913.3	1079467.0				1081068.0	IS only present in query Strain.	1. DLIS	Complete IS hit.	-	Intergenic/Pseudo/Repeaed Region	-	Intergenic/Pseudo/Repeaed Region	b1015	proline:Na(+) symporter	-	Intergenic/Pseudo/Repeaed Region	4763752.0
1	1						33	1150109	804	800	30	IS30_IS30	1150109	1151329.0	NC_000913.3_art_ISs	1149308.0	1150108.0		1151330.0	1152130.0	NC_000913.3	1110236.0				1111837.0	IS only present in query Strain.	1. DLIS	Complete IS hit.	b1048	osmoregulated periplasmic glucans (OPGs) biosynthesis protein G	-	Intergenic/Pseudo/Repeaed Region	b1048	osmoregulated periplasmic glucans (OPGs) biosynthesis protein G	b1049	osmoregulated periplasmic glucans (OPGs) biosynthesis protein H	4763752.0
1	1						34	1165669	805	800	31	IS30_IS30	1165669	1166889.0	NC_000913.3_art_ISs	1164868.0	1165668.0		1166890.0	1167690.0	NC_000913.3	1124575.0				1126176.0	IS only present in query Strain.	1. DLIS	Complete IS hit.	b1065	multidrug efflux pump MdtH	b1067	DUF480 domain-containing protein YceH	b1065	multidrug efflux pump MdtH	b1067	DUF480 domain-containing protein YceH	4763752.0
1	1						35	1252656	806	800	32	IS30_IS30	1252656	1253876.0	NC_000913.3_art_ISs	1251855.0	1252655.0		1253877.0	1254677.0	NC_000913.3	1210341.0				1211942.0	IS only present in query Strain.	1. DLIS	Complete IS hit.	-	Intergenic/Pseudo/Repeaed Region	b1160	anti-adaptor protein IraM; inhibitor of sigma(S) proteolysis	-	Intergenic/Pseudo/Repeaed Region	b1160	anti-adaptor protein IraM; inhibitor of sigma(S) proteolysis	4763752.0
1	1						36	1314729	807	800	33	IS30_IS30	1314729	1315949.0	NC_000913.3_art_ISs	1313928.0	1314728.0		1315950.0	1316750.0	NC_000913.3	1271193.0				1272794.0	IS only present in query Strain.	1. DLIS	Complete IS hit.	b1216	Na(+)/K(+):H(+) antiporter ChaA	-	Intergenic/Pseudo/Repeaed Region	b1216	Na(+)/K(+):H(+) antiporter ChaA	b1218	glutathione-specific gamma-glutamylcyclotransferase	4763752.0
1	1						37	1316873	808	800	34	IS30_IS30	1316873	1318093.0	NC_000913.3_art_ISs	1316072.0	1316872.0		1318094.0	1318894.0	NC_000913.3	1272116.0				1273717.0	IS only present in query Strain.	1. DLIS	Complete IS hit.	-	Intergenic/Pseudo/Repeaed Region	-	Intergenic/Pseudo/Repeaed Region	-	Intergenic/Pseudo/Repeaed Region	-	Intergenic/Pseudo/Repeaed Region	4763752.0
1	1						38	1332696	809	800	35	IS30_IS30	1332696	1333916.0	NC_000913.3_art_ISs	1331895.0	1332695.0		1333917.0	1334717.0	NC_000913.3	1286718.0				1288319.0	IS only present in query Strain.	1. DLIS	Complete IS hit.	b1228	putative uncharacterized protein YchS	b1232	formyltetrahydrofolate deformylase	b1228	putative uncharacterized protein YchS	b1232	formyltetrahydrofolate deformylase	4763752.0
1	1						39	1477755	810	800	36	IS30_IS30	1477755	1478975.0	NC_000913.3_art_ISs	1476954.0	1477754.0		1478976.0	1479776.0	NC_000913.3	1430556.0				1432157.0	IS only present in query Strain.	1. DLIS	Complete IS hit.	-	Intergenic/Pseudo/Repeaed Region	-	Intergenic/Pseudo/Repeaed Region	b1372	Rac prophage; putative membrane protein	b1372	Rac prophage; putative membrane protein	4763752.0
1	1						40	1530090	811	800	37	IS30_IS30	1530090	1531310.0	NC_000913.3_art_ISs	1529289.0	1530089.0		1531311.0	1532111.0	NC_000913.3	1481670.0				1483271.0	IS only present in query Strain.	1. DLIS	Complete IS hit.	b1411	putative phosphatase	b1413	ATP-dependent RNA helicase HrpA	b1411	putative phosphatase	b1413	ATP-dependent RNA helicase HrpA	4763752.0
	1			1			41	1599338	812	800	93	IS30_IS30	1599338	1600558.0	NC_000913.3_art_ISs	1598537.0	1599337.0		1600559.0	1601359.0							IS only present in query Strain.	2. Verify manually, possible false positive caused by consecutive ISs.		b1474	formate dehydrogenase N subunit alpha	-	Intergenic/Pseudo/Repeaed Region	-	-	-	-	4763752.0
	1			1			42	1601001	813	800	94	IS30_IS30	1601001	1602221.0	NC_000913.3_art_ISs	1600200.0	1601000.0		1602222.0	1603022.0							IS only present in query Strain.	2. Verify manually, possible false positive caused by consecutive ISs.		-	Intergenic/Pseudo/Repeaed Region	b1476	formate dehydrogenase N subunit gamma	-	-	-	-	4763752.0
1	1						43	1614176	814	800	38	IS30_IS30	1614176	1615396.0	NC_000913.3_art_ISs	1613375.0	1614175.0		1615397.0	1616197.0	NC_000913.3	1562093.0				1563694.0	IS only present in query Strain.	1. DLIS	Complete IS hit.	b1487	putative D;D-dipeptide ABC transporter periplasmic binding protein	b1489	oxygen-sensing c-di-GMP phosphodiesterase DosP	b1487	putative D;D-dipeptide ABC transporter periplasmic binding protein	b1489	oxygen-sensing c-di-GMP phosphodiesterase DosP	4763752.0
1	1						44	1700984	815	800	39	IS30_IS30	1700984	1702204.0	NC_000913.3_art_ISs	1700183.0	1700983.0		1702205.0	1703005.0	NC_000913.3	1647680.0				1649281.0	IS only present in query Strain.	1. DLIS	Complete IS hit.	b1569	Qin prophage; DNA-binding transcriptional regulator for DicB	-	Intergenic/Pseudo/Repeaed Region	b1569	Qin prophage; DNA-binding transcriptional regulator for DicB	-	Intergenic/Pseudo/Repeaed Region	4763752.0
1	1						45	1724977	816	800	40	IS30_IS30	1724977	1726197.0	NC_000913.3_art_ISs	1724176.0	1724976.0		1726198.0	1726998.0	NC_000913.3	1670452.0				1672053.0	IS only present in query Strain.	1. DLIS	Complete IS hit.	b1596	putative transporter YnfM	b1598	putative serine protease YdgD	b1596	putative transporter YnfM	b1598	putative serine protease YdgD	4763752.0
1	1						46	1739082	817	800	41	IS30_IS30	1739082	1740302.0	NC_000913.3_art_ISs	1738281.0	1739081.0		1740303.0	1741103.0	NC_000913.3	1683336.0				1684937.0	IS only present in query Strain.	1. DLIS	Complete IS hit.	-	Intergenic/Pseudo/Repeaed Region	b1610	DNA replication terminus site-binding protein	b1609	sensory histidine kinase RstB	b1610	DNA replication terminus site-binding protein	4763752.0
1	1						47	1744580	818	800	42	IS30_IS30	1744580	1745800.0	NC_000913.3_art_ISs	1743779.0	1744579.0		1745801.0	1746601.0	NC_000913.3	1687613.0				1689214.0	IS only present in query Strain.	1. DLIS	Complete IS hit.	b1612	fumarase A	b1613	mannose-6-phosphate isomerase	b1612	fumarase A	b1613	mannose-6-phosphate isomerase	4763752.0
1	1						48	1763370	819	800	43	IS30_IS30	1763370	1764590.0	NC_000913.3_art_ISs	1762569.0	1763369.0		1764591.0	1765391.0	NC_000913.3	1705182.0				1706783.0	IS only present in query Strain.	1. DLIS	Complete IS hit.	-	Intergenic/Pseudo/Repeaed Region	b1628	SoxR [2Fe-2S] reducing system protein RsxB	-	Intergenic/Pseudo/Repeaed Region	b1628	SoxR [2Fe-2S] reducing system protein RsxB	4763752.0
1	1						49	1767126	820	800	44	IS30_IS30	1767126	1768346.0	NC_000913.3_art_ISs	1766325.0	1767125.0		1768347.0	1769147.0	NC_000913.3	1707717.0				1709318.0	IS only present in query Strain.	1. DLIS	Complete IS hit.	-	Intergenic/Pseudo/Repeaed Region	b1630	SoxR [2Fe-2S] reducing system protein RsxD	b1629	SoxR [2Fe-2S] reducing system protein RsxC	b1630	SoxR [2Fe-2S] reducing system protein RsxD	4763752.0
1	1						50	1803050	821	800	45	IS30_IS30	1803050	1804270.0	NC_000913.3_art_ISs	1802249.0	1803049.0		1804271.0	1805071.0	NC_000913.3	1742420.0				1744021.0	IS only present in query Strain.	1. DLIS	Complete IS hit.	b1661	cyclopropane fatty acyl phospholipid synthase	b1663	multidrug efflux pump MdtK	b1661	cyclopropane fatty acyl phospholipid synthase	b1663	multidrug efflux pump MdtK	4763752.0
	1			1			51	1869279	822	800	95	IS30_IS30	1869279	1870499.0	NC_000913.3_art_ISs	1868478.0	1869278.0		1870500.0	1871300.0							IS only present in query Strain.	2. Verify manually, possible false positive caused by consecutive ISs.		b1724	protein YdiZ	-	Intergenic/Pseudo/Repeaed Region	-	-	-	-	4763752.0
	1			1			52	1870520	823	800	96	IS30_IS30	1870520	1871740.0	NC_000913.3_art_ISs	1869719.0	1870519.0		1871741.0	1872541.0							IS only present in query Strain.	2. Verify manually, possible false positive caused by consecutive ISs.		-	Intergenic/Pseudo/Repeaed Region	b1726	uncharacterized protein YniB	-	-	-	-	4763752.0
1	1						53	1904586	824	800	46	IS30_IS30	1904586	1905806.0	NC_000913.3_art_ISs	1903785.0	1904585.0		1905807.0	1906607.0	NC_000913.3	1840293.0				1841894.0	IS only present in query Strain.	1. DLIS	Complete IS hit.	b1757	molybdopterin synthase sulfurtransferase	b1759	5-hydroxy-CTP diphosphatase	b1757	molybdopterin synthase sulfurtransferase	b1759	5-hydroxy-CTP diphosphatase	4763752.0
1	1						54	1932848	825	800	47	IS30_IS30	1932848	1934068.0	NC_000913.3_art_ISs	1932047.0	1932847.0		1934069.0	1934869.0	NC_000913.3	1867334.0				1868935.0	IS only present in query Strain.	1. DLIS	Complete IS hit.	-	Intergenic/Pseudo/Repeaed Region	-	Intergenic/Pseudo/Repeaed Region	b1783	protein kinase YeaG	-	Intergenic/Pseudo/Repeaed Region	4763752.0
1	1						55	1937860	826	800	48	IS30_IS30	1937860	1939080.0	NC_000913.3_art_ISs	1937059.0	1937859.0		1939081.0	1939881.0	NC_000913.3	1871125.0				1872726.0	IS only present in query Strain.	1. DLIS	Complete IS hit.	b1785	putative c-di-GMP binding protein CdgI	b1786	putative diguanylate cyclase DgcJ	b1785	putative c-di-GMP binding protein CdgI	b1786	putative diguanylate cyclase DgcJ	4763752.0
1	1						56	2146825	827	800	49	IS30_IS30	2146825	2148045.0	NC_000913.3_art_ISs	2146024.0	2146824.0		2148046.0	2148846.0	NC_000913.3	2078869.0				2080470.0	IS only present in query Strain.	1. DLIS	Complete IS hit.	b4538	CP4-44 prophage; putative uncharacterized protein YoeF	-	Intergenic/Pseudo/Repeaed Region	b4538	CP4-44 prophage; putative uncharacterized protein YoeF	b2008	putative transporter YeeA	4763752.0
1	1						57	2291220	828	800	50	IS30_IS30	2291220	2292440.0	NC_000913.3_art_ISs	2290419.0	2291219.0		2292441.0	2293241.0	NC_000913.3	2222043.0				2223644.0	IS only present in query Strain.	1. DLIS	Complete IS hit.	-	Intergenic/Pseudo/Repeaed Region	-	Intergenic/Pseudo/Repeaed Region	-	Intergenic/Pseudo/Repeaed Region	b2133	D-lactate dehydrogenase	4763752.0
1	1						58	2302324	829	800	51	IS30_IS30	2302324	2303544.0	NC_000913.3_art_ISs	2301523.0	2302323.0		2303545.0	2304345.0	NC_000913.3	2231926.0				2233527.0	IS only present in query Strain.	1. DLIS	Complete IS hit.	-	Intergenic/Pseudo/Repeaed Region	b2144	DUF218 domain-containing protein SanA	b2143	cytidine/deoxycytidine deaminase	b2144	DUF218 domain-containing protein SanA	4763752.0
1	1						59	2305151	830	800	52	IS30_IS30	2305151	2306371.0	NC_000913.3_art_ISs	2304350.0	2305150.0		2306372.0	2307172.0	NC_000913.3	2233532.0				2235133.0	IS only present in query Strain.	1. DLIS	Complete IS hit.	b2144	DUF218 domain-containing protein SanA	-	Intergenic/Pseudo/Repeaed Region	b2144	DUF218 domain-containing protein SanA	b2146	NAD-dependent dihydropyrimidine dehydrogenase subunit PreT	4763752.0
	1			1			60	2314302	831	800	97	IS30_IS30	2314302	2315125.0	NC_000913.3_art_ISs	2313501.0	2314301.0		2315126.0	2315926.0							IS only present in query Strain.	2. Verify manually, possible false positive caused by consecutive ISs.	Partial IS hit.	b2151	DNA-binding transcriptional dual regulator GalS	-	Intergenic/Pseudo/Repeaed Region	-	-	-	-	4763752.0
	1			1			61	2315125	832	800	98	IS30_IS30	2315125	2315756.0	NC_000913.3_art_ISs	2314324.0	2315124.0		2315757.0	2316557.0							IS only present in query Strain.	2. Verify manually, possible false positive caused by consecutive ISs.	Partial IS hit.	-	Intergenic/Pseudo/Repeaed Region	-	Intergenic/Pseudo/Repeaed Region	-	-	-	-	4763752.0
	1			1			62	2315757	833	800	99	IS30_IS30	2315757	2316977.0	NC_000913.3_art_ISs	2314956.0	2315756.0		2316978.0	2317778.0							IS only present in query Strain.	2. Verify manually, possible false positive caused by consecutive ISs.		-	Intergenic/Pseudo/Repeaed Region	-	Intergenic/Pseudo/Repeaed Region	-	-	-	-	4763752.0
1	1						63	2331004	834	800	53	IS30_IS30	2331004	2332224.0	NC_000913.3_art_ISs	2330203.0	2331003.0		2332225.0	2333025.0	NC_000913.3	2254501.0				2256102.0	IS only present in query Strain.	1. DLIS	Complete IS hit.	b2162	pyrimidine-specific ribonucleoside hydrolase RihB	b2164	putative pseudouridine transporter	b2162	pyrimidine-specific ribonucleoside hydrolase RihB	b2164	putative pseudouridine transporter	4763752.0
1	1						64	2338335	835	800	54	IS30_IS30	2338335	2339555.0	NC_000913.3_art_ISs	2337534.0	2338334.0		2339556.0	2340356.0	NC_000913.3	2260611.0				2262212.0	IS only present in query Strain.	1. DLIS	Complete IS hit.	b2167	fructose-specific PTS multiphosphoryl transfer protein FruA	b2168	1-phosphofructokinase	b2167	fructose-specific PTS multiphosphoryl transfer protein FruA	b2168	1-phosphofructokinase	4763752.0
1	1						65	2415048	836	800	55	IS30_IS30	2415048	2416268.0	NC_000913.3_art_ISs	2414247.0	2415047.0		2416269.0	2417069.0	NC_000913.3	2336103.0				2337704.0	IS only present in query Strain.	1. DLIS	Complete IS hit.	b2230	DUF2138 domain-containing protein YfaA	-	Intergenic/Pseudo/Repeaed Region	b2230	DUF2138 domain-containing protein YfaA	b2231	DNA gyrase subunit A	4763752.0
1	1						66	2462961	837	800	56	IS30_IS30	2462961	2464181.0	NC_000913.3_art_ISs	2462160.0	2462960.0		2464182.0	2464982.0	NC_000913.3	2382795.0				2384396.0	IS only present in query Strain.	1. DLIS	Complete IS hit.	-	Intergenic/Pseudo/Repeaed Region	b2270	IPR002035/DUF3520 domain-containing protein YfbK	b2269	protease ElaD	b2270	IPR002035/DUF3520 domain-containing protein YfbK	4763752.0
1	1						67	2528130	838	800	57	IS30_IS30	2528130	2529350.0	NC_000913.3_art_ISs	2527329.0	2528129.0		2529351.0	2530151.0	NC_000913.3	2446743.0				2448344.0	IS only present in query Strain.	1. DLIS	Complete IS hit.	b2329	chorismate synthase	-	Intergenic/Pseudo/Repeaed Region	b2329	chorismate synthase	b2330	50S ribosomal subunit protein L3 N(5)-glutamine methyltransferase	4763752.0
1	1						68	2951446	839	800	58	IS30_IS30	2951446	2952666.0	NC_000913.3_art_ISs	2950645.0	2951445.0		2952667.0	2953467.0	NC_000913.3	2868838.0				2870439.0	IS only present in query Strain.	1. DLIS	Complete IS hit.	-	Intergenic/Pseudo/Repeaed Region	b2745	tRNA pseudouridine(13) synthase	-	Intergenic/Pseudo/Repeaed Region	b2745	tRNA pseudouridine(13) synthase	4763752.0
1	1						69	2954441	840	800	59	IS30_IS30	2954441	2955661.0	NC_000913.3_art_ISs	2953640.0	2954440.0		2955662.0	2956462.0	NC_000913.3	2870612.0				2872213.0	IS only present in query Strain.	1. DLIS	Complete IS hit.	b2745	tRNA pseudouridine(13) synthase	b2747	2-C-methyl-D-erythritol 4-phosphate cytidylyltransferase	b2745	tRNA pseudouridine(13) synthase	b2747	2-C-methyl-D-erythritol 4-phosphate cytidylyltransferase	4763752.0
1	1						70	2983613	841	800	60	IS30_IS30	2983613	2984833.0	NC_000913.3_art_ISs	2982812.0	2983612.0		2984834.0	2985634.0	NC_000913.3	2898563.0				2900164.0	IS only present in query Strain.	1. DLIS	Complete IS hit.	-	Intergenic/Pseudo/Repeaed Region	b2774	putative deoxygluconate dehydrogenase	b4463	putative FAD-containing dehydrogenase	b2774	putative deoxygluconate dehydrogenase	4763752.0
1	1						71	3057300	842	800	61	IS30_IS30	3057300	3058520.0	NC_000913.3_art_ISs	3056499.0	3057299.0		3058521.0	3059321.0	NC_000913.3	2971029.0				2972630.0	IS only present in query Strain.	1. DLIS	Complete IS hit.	b2832	UPF0053 inner membrane protein YgdQ	-	Intergenic/Pseudo/Repeaed Region	b2832	UPF0053 inner membrane protein YgdQ	b2834	putative NADP(H)-dependent aldo-keto reductase Tas	4763752.0
1	1						72	3104435	843	800	62	IS30_IS30	3104435	3105655.0	NC_000913.3_art_ISs	3103634.0	3104434.0		3105656.0	3106456.0	NC_000913.3	3016943.0				3018544.0	IS only present in query Strain.	1. DLIS	Complete IS hit.	-	Intergenic/Pseudo/Repeaed Region	-	Intergenic/Pseudo/Repeaed Region	b2878	putative oxidoreductase; Fe-S subunit	b2878	putative oxidoreductase; Fe-S subunit	4763752.0
1	1						73	3137784	844	800	63	IS30_IS30	3137784	3139004.0	NC_000913.3_art_ISs	3136983.0	3137783.0		3139005.0	3139805.0	NC_000913.3	3049071.0				3050672.0	IS only present in query Strain.	1. DLIS	Complete IS hit.	-	Intergenic/Pseudo/Repeaed Region	-	Intergenic/Pseudo/Repeaed Region	-	Intergenic/Pseudo/Repeaed Region	-	Intergenic/Pseudo/Repeaed Region	4763752.0
1	1						74	3161238	845	800	64	IS30_IS30	3161238	3162458.0	NC_000913.3_art_ISs	3160437.0	3161237.0		3162459.0	3163259.0	NC_000913.3	3071304.0				3072905.0	IS only present in query Strain.	1. DLIS	Complete IS hit.	-	Intergenic/Pseudo/Repeaed Region	b2927	D-erythrose-4-phosphate dehydrogenase	-	Intergenic/Pseudo/Repeaed Region	b2927	D-erythrose-4-phosphate dehydrogenase	4763752.0
1	1						75	3226249	846	800	65	IS30_IS30	3226249	3227469.0	NC_000913.3_art_ISs	3225448.0	3226248.0		3227470.0	3228270.0	NC_000913.3	3135094.0				3136695.0	IS only present in query Strain.	1. DLIS	Complete IS hit.	-	Intergenic/Pseudo/Repeaed Region	b2988	fused glutathionylspermidine amidase/glutathionylspermidine synthetase	b2987	metal phosphate:H(+) symporter PitB	b2988	fused glutathionylspermidine amidase/glutathionylspermidine synthetase	4763752.0
1	1						76	3361527	847	800	66	IS30_IS30	3361527	3362747.0	NC_000913.3_art_ISs	3360726.0	3361526.0		3362748.0	3363548.0	NC_000913.3	3269151.0				3270752.0	IS only present in query Strain.	1. DLIS	Complete IS hit.	b3121	uncharacterized protein YhaC	b3124	glycerate 2-kinase 1	b3121	uncharacterized protein YhaC	b3124	glycerate 2-kinase 1	4763752.0
1	1						77	3386688	848	800	67	IS30_IS30	3386688	3387908.0	NC_000913.3_art_ISs	3385887.0	3386687.0		3387909.0	3388709.0	NC_000913.3	3293091.0				3294692.0	IS only present in query Strain.	1. DLIS	Complete IS hit.	b3146	16S rRNA 2'-O-ribose C1402 methyltransferase	-	Intergenic/Pseudo/Repeaed Region	b3146	16S rRNA 2'-O-ribose C1402 methyltransferase	b3147	outer membrane lipoprotein - activator of MrcA activity	4763752.0
1	1						78	3441448	849	800	68	IS30_IS30	3441448	3442668.0	NC_000913.3_art_ISs	3440647.0	3441447.0		3442669.0	3443469.0	NC_000913.3	3346630.0				3348231.0	IS only present in query Strain.	1. DLIS	Complete IS hit.	b3204	phosphotransferase system enzyme IIA(Ntr)	b3206	phosphorelay protein Npr	b3204	phosphotransferase system enzyme IIA(Ntr)	b3206	phosphorelay protein Npr	4763752.0
1	1						79	3596382	850	800	69	IS30_IS30	3596382	3597602.0	NC_000913.3_art_ISs	3595581.0	3596381.0		3597603.0	3598403.0	NC_000913.3	3500343.0				3501944.0	IS only present in query Strain.	1. DLIS	Complete IS hit.	-	Intergenic/Pseudo/Repeaed Region	b3371	fructoselysine 6-phosphate deglycase	b3370	fructoselysine/psicoselysine transporter	b3371	fructoselysine 6-phosphate deglycase	4763752.0
1	1						80	3615538	851	800	70	IS30_IS30	3615538	3616758.0	NC_000913.3_art_ISs	3614737.0	3615537.0		3616759.0	3617559.0	NC_000913.3	3518278.0				3519879.0	IS only present in query Strain.	1. DLIS	Complete IS hit.	b3389	3-dehydroquinate synthase	-	Intergenic/Pseudo/Repeaed Region	b3389	3-dehydroquinate synthase	b3391	DNA utilization protein HofQ	4763752.0
1	1						81	3617769	852	800	71	IS30_IS30	3617769	3618989.0	NC_000913.3_art_ISs	3616968.0	3617768.0		3618990.0	3619790.0	NC_000913.3	3519288.0				3520889.0	IS only present in query Strain.	1. DLIS	Complete IS hit.	-	Intergenic/Pseudo/Repeaed Region	b3392	DNA utilization protein HofP	-	Intergenic/Pseudo/Repeaed Region	b3392	DNA utilization protein HofP	4763752.0
1	1						82	3654946	853	800	72	IS30_IS30	3654946	3656166.0	NC_000913.3_art_ISs	3654145.0	3654945.0		3656167.0	3656967.0	NC_000913.3	3555244.0				3556845.0	IS only present in query Strain.	1. DLIS	Complete IS hit.	b3418	DNA-binding transcriptional activator MalT	-	Intergenic/Pseudo/Repeaed Region	b3418	DNA-binding transcriptional activator MalT	b4475	RNA 3'-terminal phosphate cyclase	4763752.0
1	1						83	3658126	854	800	73	IS30_IS30	3658126	3659346.0	NC_000913.3_art_ISs	3657325.0	3658125.0		3659347.0	3660147.0	NC_000913.3	3557203.0				3558804.0	IS only present in query Strain.	1. DLIS	Complete IS hit.	-	Intergenic/Pseudo/Repeaed Region	b3422	DNA-binding transcriptional activator RtcR	b3421	RNA-splicing ligase	b3422	DNA-binding transcriptional activator RtcR	4763752.0
1	1						84	3727323	855	800	74	IS30_IS30	3727323	3728543.0	NC_000913.3_art_ISs	3726522.0	3727322.0		3728544.0	3729344.0	NC_000913.3	3625179.0				3626780.0	IS only present in query Strain.	1. DLIS	Complete IS hit.	b3484	putative transposase	-	Intergenic/Pseudo/Repeaed Region	b3484	putative transposase	b3485	ABC transporter family protein YhhJ	4763752.0
1	1						85	3766127	856	800	75	IS30_IS30	3766127	3767347.0	NC_000913.3_art_ISs	3765326.0	3766126.0		3767348.0	3768148.0	NC_000913.3	3662762.0				3664363.0	IS only present in query Strain.	1. DLIS	Complete IS hit.	b3514	multidrug efflux pump RND permease MdtF	b3515	DNA-binding transcriptional dual regulator GadW	b3514	multidrug efflux pump RND permease MdtF	b3515	DNA-binding transcriptional dual regulator GadW	4763752.0
1	1						86	3798695	857	800	76	IS30_IS30	3798695	3799915.0	NC_000913.3_art_ISs	3797894.0	3798694.0		3799916.0	3800716.0	NC_000913.3	3694109.0				3695710.0	IS only present in query Strain.	1. DLIS	Complete IS hit.	-	Intergenic/Pseudo/Repeaed Region	b3534	cellulose biosynthesis protein	b3533	cellulose synthase catalytic subunit	b3534	cellulose biosynthesis protein	4763752.0
1	1						87	3900620	858	800	77	IS30_IS30	3900620	3901840.0	NC_000913.3_art_ISs	3899819.0	3900619.0		3901841.0	3902641.0	NC_000913.3	3794813.0				3796414.0	IS only present in query Strain.	1. DLIS	Complete IS hit.	b3619	ADP-L-glycero-D-mannoheptose 6-epimerase	b3621	ADP-heptose:LPS heptosyltransferase 1	b3619	ADP-L-glycero-D-mannoheptose 6-epimerase	b3621	ADP-heptose:LPS heptosyltransferase 1	4763752.0
1	1						88	4006509	859	800	78	IS30_IS30	4006509	4007729.0	NC_000913.3_art_ISs	4005708.0	4006508.0		4007730.0	4008530.0	NC_000913.3	3899481.0				3901082.0	IS only present in query Strain.	1. DLIS	Complete IS hit.	-	Intergenic/Pseudo/Repeaed Region	b3720	carbohydrate-specific outer membrane porin; cryptic	b3719	putative hydrolase YieL	b3720	carbohydrate-specific outer membrane porin; cryptic	4763752.0
1	1						89	4013286	860	800	79	IS30_IS30	4013286	4014506.0	NC_000913.3_art_ISs	4012485.0	4013285.0		4014507.0	4015307.0	NC_000913.3	3905037.0				3906638.0	IS only present in query Strain.	1. DLIS	Complete IS hit.	b3722	beta-glucoside specific PTS enzyme II/BglG kinase/BglG phosphatase	-	Intergenic/Pseudo/Repeaed Region	b3722	beta-glucoside specific PTS enzyme II/BglG kinase/BglG phosphatase	-	Intergenic/Pseudo/Repeaed Region	4763752.0
1	1						90	4027534	861	800	80	IS30_IS30	4027534	4028754.0	NC_000913.3_art_ISs	4026733.0	4027533.0		4028755.0	4029555.0	NC_000913.3	3918064.0				3919665.0	IS only present in query Strain.	1. DLIS	Complete IS hit.	b3733	ATP synthase F1 complex subunit gamma	-	Intergenic/Pseudo/Repeaed Region	b3733	ATP synthase F1 complex subunit gamma	b3734	ATP synthase F1 complex subunit alpha	4763752.0
1	1						91	4248889	862	800	81	IS30_IS30	4248889	4250109.0	NC_000913.3_art_ISs	4248088.0	4248888.0		4250110.0	4250910.0	NC_000913.3	4138198.0				4139799.0	IS only present in query Strain.	1. DLIS	Complete IS hit.	-	Intergenic/Pseudo/Repeaed Region	b3947	putative PTS multiphosphoryl transfer protein PtsA	b3945	L-1;2-propanediol dehydrogenase/glycerol dehydrogenase	b3947	putative PTS multiphosphoryl transfer protein PtsA	4763752.0
1	1						92	4260696	863	800	82	IS30_IS30	4260696	4261916.0	NC_000913.3_art_ISs	4259895.0	4260695.0		4261917.0	4262717.0	NC_000913.3	4148784.0				4150385.0	IS only present in query Strain.	1. DLIS	Complete IS hit.	-	Intergenic/Pseudo/Repeaed Region	-	Intergenic/Pseudo/Repeaed Region	b3955	phosphoethanolamine transferase EptC	-	Intergenic/Pseudo/Repeaed Region	4763752.0
1	1						93	4264502	864	800	83	IS30_IS30	4264502	4265722.0	NC_000913.3_art_ISs	4263701.0	4264501.0		4265723.0	4266523.0	NC_000913.3	4151369.0				4152970.0	IS only present in query Strain.	1. DLIS	Complete IS hit.	-	Intergenic/Pseudo/Repeaed Region	-	Intergenic/Pseudo/Repeaed Region	b3956	phosphoenolpyruvate carboxylase	b3956	phosphoenolpyruvate carboxylase	4763752.0
1	1						94	4311821	865	800	84	IS30_IS30	4311821	4313041.0	NC_000913.3_art_ISs	4311020.0	4311820.0		4313042.0	4313842.0	NC_000913.3	4197467.0				4199068.0	IS only present in query Strain.	1. DLIS	Complete IS hit.	b3996	NADH pyrophosphatase	b3998	endonuclease V	b3996	NADH pyrophosphatase	b3998	endonuclease V	4763752.0
1	1						95	4389275	866	800	85	IS30_IS30	4389275	4390495.0	NC_000913.3_art_ISs	4388474.0	4389274.0		4390496.0	4391296.0	NC_000913.3	4273700.0				4275301.0	IS only present in query Strain.	1. DLIS	Complete IS hit.	b4058	excision nuclease subunit A	-	Intergenic/Pseudo/Repeaed Region	b4058	excision nuclease subunit A	-	Intergenic/Pseudo/Repeaed Region	4763752.0
1	1						96	4434397	867	800	86	IS30_IS30	4434397	4435617.0	NC_000913.3_art_ISs	4433596.0	4434396.0		4435618.0	4436418.0	NC_000913.3	4317601.0				4319202.0	IS only present in query Strain.	1. DLIS	Complete IS hit.	b4096	methylphosphonate degradation complex subunit PhnL	b4098	carbon-phosphorus lyase core complex subunit PhnJ	b4096	methylphosphonate degradation complex subunit PhnL	b4098	carbon-phosphorus lyase core complex subunit PhnJ	4763752.0
	1			1			97	4461112	868	800	102	IS30_IS30	4461112	4461482.0	NC_000913.3_art_ISs	4460311.0	4461111.0		4461483.0	4462283.0							IS only present in query Strain.	2. Verify manually, possible false positive caused by consecutive ISs.	Partial IS hit.	b4119	alpha-galactosidase	-	Intergenic/Pseudo/Repeaed Region	-	-	-	-	4763752.0
	1			1			98	4461481	869	800	103	IS30_IS30	4461481	4462701.0	NC_000913.3_art_ISs	4460680.0	4461480.0		4462702.0	4463502.0							IS only present in query Strain.	2. Verify manually, possible false positive caused by consecutive ISs.		-	Intergenic/Pseudo/Repeaed Region	-	Intergenic/Pseudo/Repeaed Region	-	-	-	-	4763752.0
1	1						99	4509587	870	800	87	IS30_IS30	4509587	4510807.0	NC_000913.3_art_ISs	4508786.0	4509586.0		4510808.0	4511608.0	NC_000913.3	4389128.0				4390729.0	IS only present in query Strain.	1. DLIS	Complete IS hit.	b4159	miniconductance mechanosensitive channel MscM	b4161	ribosome small subunit-dependent GTPase A	b4159	miniconductance mechanosensitive channel MscM	b4161	ribosome small subunit-dependent GTPase A	4763752.0
1	1						100	4524761	871	800	88	IS30_IS30	4524761	4525981.0	NC_000913.3_art_ISs	4523960.0	4524760.0		4525982.0	4526782.0	NC_000913.3	4403081.0				4404682.0	IS only present in query Strain.	1. DLIS	Complete IS hit.	b4174	regulator of FtsH protease	-	Intergenic/Pseudo/Repeaed Region	b4174	regulator of FtsH protease	-	Intergenic/Pseudo/Repeaed Region	4763752.0
			1						872	800	90	IS30_IS30	249701	250822.0	NC_000913.3_art_ISs	248900.0	249700.0		250823.0	251623.0							IS only present in query Strain.	2. Verify manually, possible false positive caused by consecutive ISs.	Partial IS hit.	-	Intergenic/Pseudo/Repeaed Region	-	Intergenic/Pseudo/Repeaed Region	-	-	-	-	4763752.0
			1						873	800	91	ISEc1_ISAs1	736682	737971.0	NC_000913.3_art_ISs	762743.0				764367.0	NC_000913.3	735881.0	736681.0		737972.0	738772.0	IS only present in ref Strain.	2. Verify manually, possible false positive caused by consecutive ISs.	Complete IS hit.	b0704	uncharacterized protein YbfC	b0705	putative transposase YbfL	b0681	chitobiose outer membrane channel	b0684	flavodoxin 1	4641652.0
			1						874	800	92	ISEc1_ISAs1	763544	764833.0	NC_000913.3_art_ISs	762743.0	763543.0		764834.0	765634.0	NC_000913.3	735881.0				737505.0	IS only present in query Strain.	2. Verify manually, possible false positive caused by consecutive ISs.	Complete IS hit.	b0704	uncharacterized protein YbfC	b0706	H repeat-associated putative transposase YbfD	b0704	uncharacterized protein YbfC	b0705	putative transposase YbfL	4763752.0
			1						875	800	100	IS30_IS30	2316971	2317566.0	NC_000913.3_art_ISs	2316170.0	2316970.0		2317567.0	2318367.0							IS only present in query Strain.	2. Verify manually, possible false positive caused by consecutive ISs.	Partial IS hit.	-	Intergenic/Pseudo/Repeaed Region	-	Intergenic/Pseudo/Repeaed Region	-	-	-	-	4763752.0
			1						876	800	101	IS30_IS30	2317567	2317964.0	NC_000913.3_art_ISs	2316766.0	2317566.0		2317965.0	2318765.0							IS only present in query Strain.	2. Verify manually, possible false positive caused by consecutive ISs.	Partial IS hit.	-	Intergenic/Pseudo/Repeaed Region	b2153	GTP cyclohydrolase 1	-	-	-	-	4763752.0
			1						877	800	104	IS30_IS30	4462702	4463553.0	NC_000913.3_art_ISs	4461901.0	4462701.0		4463554.0	4464354.0							IS only present in query Strain.	2. Verify manually, possible false positive caused by consecutive ISs.	Partial IS hit.	-	Intergenic/Pseudo/Repeaed Region	-	Intergenic/Pseudo/Repeaed Region	-	-	-	-	4763752.0
			1						878	800	105	IS2_IS2_IS3	399833	400905.0	NC_000913.3_art_ISs	399032.0	399832.0		400906.0	401706.0							IS only present in query Strain.	5. Discarded for analysis. There were multiple blastn hits, and left and right pairs could not be determined.	Partial IS hit.	-	Intergenic/Pseudo/Repeaed Region	b0363	putative glucosyltransferase	-	-	-	-	4763752.0
			1						879	800	106	MITEEc1_IS630	3071273	3071395.0	NC_000913.3_art_ISs	3160527.0	3161237.0				NC_000913.3	3070472.0	3071272.0		3071396.0	3072196.0	IS only present in ref Strain.	5. Discarded for analysis. There were multiple blastn hits, and left and right pairs could not be determined.		-	Intergenic/Pseudo/Repeaed Region	-	-	b2843	5-dehydro-4-deoxy-D-glucuronate isomerase	b2844	putative acyltransferase	4641652.0
			1						880	800	107	MITEEc1_IS630	3160406	3160528.0	NC_000913.3_art_ISs	3159605.0	3160405.0		3160529.0	3161329.0	NC_000913.3	3071394.0	3072104.0				IS only present in query Strain.	5. Discarded for analysis. There were multiple blastn hits, and left and right pairs could not be determined.		b2925	fructose-bisphosphate aldolase class II	-	Intergenic/Pseudo/Repeaed Region	b2926	phosphoglycerate kinase	-	-	4763752.0
			1						881	800	108	ISEc1_ISAs1	3725577	3726867.0	NC_000913.3_art_ISs	3724776.0	3725576.0		3726868.0	3727668.0							IS only present in query Strain.	5. Discarded for analysis. There were multiple blastn hits, and left and right pairs could not be determined.		b3483	PF15631 family protein YhhH	-	Intergenic/Pseudo/Repeaed Region	-	-	-	-	4763752.0
			1						882	800	109	ISEc1_ISAs1	3624234	3625524.0							NC_000913.3	3623433.0	3624233.0		3625525.0	3626325.0	IS only present in ref Strain.	5. Discarded for analysis. There were multiple blastn hits, and left and right pairs could not be determined.		-	-	-	-	b3483	PF15631 family protein YhhH	b3485	ABC transporter family protein YhhJ	4641652.0
89	99	0	11	11	1	*			883	800
1	1						1	446	884	900	0	IS30_IS30	446	1666.0	NC_000913.3_art_ISs	1.0	445.0		1667.0	2567.0	NC_000913.3	1.0				1346.0	IS only present in query Strain.	1. DLIS	Complete IS hit.	-	Intergenic/Pseudo/Repeaed Region	-	Intergenic/Pseudo/Repeaed Region	-	Intergenic/Pseudo/Repeaed Region	b0002	fused aspartate kinase/homoserine dehydrogenase 1	4763752.0
1	1						2	3160	885	900	1	IS30_IS30	3160	4380.0	NC_000913.3_art_ISs	2259.0	3159.0		4381.0	5281.0	NC_000913.3	1038.0				2839.0	IS only present in query Strain.	1. DLIS	Complete IS hit.	-	Intergenic/Pseudo/Repeaed Region	b0003	homoserine kinase	b0002	fused aspartate kinase/homoserine dehydrogenase 1	b0003	homoserine kinase	4763752.0
1	1						3	123711	886	900	2	IS30_IS30	123711	124931.0	NC_000913.3_art_ISs	122810.0	123710.0		124932.0	125832.0	NC_000913.3	120368.0				122169.0	IS only present in query Strain.	1. DLIS	Complete IS hit.	-	Intergenic/Pseudo/Repeaed Region	b0113	DNA-binding transcriptional dual regulator PdhR	b0112	aromatic amino acid:H(+) symporter AroP	b0113	DNA-binding transcriptional dual regulator PdhR	4763752.0
1	1						4	142989	887	900	3	IS30_IS30	142989	144209.0	NC_000913.3_art_ISs	142088.0	142988.0		144210.0	145110.0	NC_000913.3	138425.0				140226.0	IS only present in query Strain.	1. DLIS	Complete IS hit.	b0123	cuprous oxidase/multicopper oxidase with role in copper homeostasis	-	Intergenic/Pseudo/Repeaed Region	b0123	cuprous oxidase/multicopper oxidase with role in copper homeostasis	b0124	quinoprotein glucose dehydrogenase	4763752.0
1	1						5	163498	888	900	4	IS30_IS30	163498	164718.0	NC_000913.3_art_ISs	162597.0	163497.0		164719.0	165619.0	NC_000913.3	157713.0				159514.0	IS only present in query Strain.	1. DLIS	Complete IS hit.	b0142	2-amino-4-hydroxy-6- hydroxymethyldihydropteridine diphosphokinase	b0144	glutamyl-Q tRNA(Asp) synthetase	b0142	2-amino-4-hydroxy-6- hydroxymethyldihydropteridine diphosphokinase	b0144	glutamyl-Q tRNA(Asp) synthetase	4763752.0
1	1						6	240046	889	900	5	IS30_IS30	240046	241266.0	NC_000913.3_art_ISs	239145.0	240045.0		241267.0	242167.0	NC_000913.3	233040.0				234841.0	IS only present in query Strain.	1. DLIS	Complete IS hit.	-	Intergenic/Pseudo/Repeaed Region	b0213	putative S-adenosyl-L-methionine-dependent methyltransferase	b0211	membrane-bound lytic murein transglycosylase D	b0213	putative S-adenosyl-L-methionine-dependent methyltransferase	4763752.0
				1	1		7	248381	890	900
	1			1			8	248480	891	900	89	IS30_IS30	248480	249700.0	NC_000913.3_art_ISs	247579.0	248479.0		249701.0	250601.0							IS only present in query Strain.	2. Verify manually, possible false positive caused by consecutive ISs.		-	Intergenic/Pseudo/Repeaed Region	-	Intergenic/Pseudo/Repeaed Region	-	-	-	-	4763752.0
1	1						9	310515	892	900	6	IS30_IS30	310515	311735.0	NC_000913.3_art_ISs	309614.0	310514.0		311736.0	312636.0	NC_000913.3	299846.0				301647.0	IS only present in query Strain.	1. DLIS	Complete IS hit.	-	Intergenic/Pseudo/Repeaed Region	b0285	aldehyde dehydrogenase; FAD-binding subunit	b0284	aldehyde dehydrogenase: molybdenum cofactor-binding subunit	b0285	aldehyde dehydrogenase; FAD-binding subunit	4763752.0
1	1						10	315801	893	900	7	IS30_IS30	315801	317021.0	NC_000913.3_art_ISs	314900.0	315800.0		317022.0	317922.0	NC_000913.3	303911.0				305712.0	IS only present in query Strain.	1. DLIS	Complete IS hit.	b0288	putative zinc- or iron-chelating domain-containing protein YkgJ	b0290	fimbrial adhesin EcpD	b0288	putative zinc- or iron-chelating domain-containing protein YkgJ	b0290	fimbrial adhesin EcpD	4763752.0
1	1						11	333734	894	900	8	IS30_IS30	333734	334954.0	NC_000913.3_art_ISs	332833.0	333733.0		334955.0	335855.0	NC_000913.3	320623.0				322424.0	IS only present in query Strain.	1. DLIS	Complete IS hit.	b0305	DNA-binding transcriptional activator RclR	b0307	putative amino acid dehydrogenase with NAD(P)-binding domain and ferridoxin-like domain	b0305	DNA-binding transcriptional activator RclR	b0307	putative amino acid dehydrogenase with NAD(P)-binding domain and ferridoxin-like domain	4763752.0
1	1						12	356194	895	900	9	IS30_IS30	356194	357414.0	NC_000913.3_art_ISs	355293.0	356193.0		357415.0	358315.0	NC_000913.3	341862.0				343663.0	IS only present in query Strain.	1. DLIS	Complete IS hit.	b0324	putative deaminase with metallo-dependent hydrolase domain	b0325	aldehyde reductase; NADPH-dependent	b0324	putative deaminase with metallo-dependent hydrolase domain	b0325	aldehyde reductase; NADPH-dependent	4763752.0
1	1						13	361260	896	900	10	IS30_IS30	361260	362480.0	NC_000913.3_art_ISs	360359.0	361259.0		362481.0	363381.0	NC_000913.3	345707.0				347508.0	IS only present in query Strain.	1. DLIS	Complete IS hit.	b0328	putative amino acid exporter	b0330	DNA-binding transcriptional dual regulator PrpR	b0328	putative amino acid exporter	b0330	DNA-binding transcriptional dual regulator PrpR	4763752.0
1	1						14	395877	897	900	11	IS30_IS30	395877	397097.0	NC_000913.3_art_ISs	394976.0	395876.0		397098.0	397998.0	NC_000913.3	379103.0				380904.0	IS only present in query Strain.	1. DLIS	Complete IS hit.	b0356	S-(hydroxymethyl)glutathione dehydrogenase	-	Intergenic/Pseudo/Repeaed Region	b0356	S-(hydroxymethyl)glutathione dehydrogenase	b4579	putative acyltransferase; N-terminal fragment	4763752.0
1	1						15	398612	898	900	12	IS30_IS30	398612	399832.0	NC_000913.3_art_ISs	397711.0	398611.0		399833.0	400733.0	NC_000913.3	380617.0				382418.0	IS only present in query Strain.	1. DLIS	Complete IS hit.	b0358	outer membrane protein YaiO	b0361	IS2 element protein	b0358	outer membrane protein YaiO	b0361	IS2 element protein	4763752.0
1	1						16	458588	899	900	13	IS30_IS30	458588	459808.0	NC_000913.3_art_ISs	457687.0	458587.0		459809.0	460709.0	NC_000913.3	439372.0				441173.0	IS only present in query Strain.	1. DLIS	Complete IS hit.	b0420	1-deoxy-D-xylulose-5-phosphate synthase	b0422	exodeoxyribonuclease VII subunit XseB	b0420	1-deoxy-D-xylulose-5-phosphate synthase	b0422	exodeoxyribonuclease VII subunit XseB	4763752.0
1	1						17	515332	900	900	14	IS30_IS30	515332	516552.0	NC_000913.3_art_ISs	514431.0	515331.0		516553.0	517453.0	NC_000913.3	494895.0				496696.0	IS only present in query Strain.	1. DLIS	Complete IS hit.	b0472	DNA repair protein RecR	-	Intergenic/Pseudo/Repeaed Region	b0472	DNA repair protein RecR	b0473	chaperone protein HtpG	4763752.0
1	1						18	518331	901	900	15	IS30_IS30	518331	519551.0	NC_000913.3_art_ISs	517430.0	518330.0		519552.0	520452.0	NC_000913.3	496673.0				498474.0	IS only present in query Strain.	1. DLIS	Complete IS hit.	-	Intergenic/Pseudo/Repeaed Region	b0475	ferrochelatase	b0473	chaperone protein HtpG	b0475	ferrochelatase	4763752.0
1	1						19	564278	902	900	16	IS30_IS30	564278	565498.0	NC_000913.3_art_ISs	563377.0	564277.0		565499.0	566399.0	NC_000913.3	541399.0				543200.0	IS only present in query Strain.	1. DLIS	Complete IS hit.	b0513	putative purine transporter	-	Intergenic/Pseudo/Repeaed Region	b0513	putative purine transporter	-	Intergenic/Pseudo/Repeaed Region	4763752.0
1	1						20	638410	903	900	17	IS30_IS30	638410	639630.0	NC_000913.3_art_ISs	637509.0	638409.0		639631.0	640531.0	NC_000913.3	614310.0				616111.0	IS only present in query Strain.	1. DLIS	Complete IS hit.	-	Intergenic/Pseudo/Repeaed Region	-	Intergenic/Pseudo/Repeaed Region	b0586	apo-serine activating enzyme	b0586	apo-serine activating enzyme	4763752.0
1	1						21	643571	904	900	18	IS30_IS30	643571	644791.0	NC_000913.3_art_ISs	642670.0	643570.0		644792.0	645692.0	NC_000913.3	618250.0				620051.0	IS only present in query Strain.	1. DLIS	Complete IS hit.	-	Intergenic/Pseudo/Repeaed Region	b0588	ferric enterobactin ABC transporter ATP binding subunit	-	Intergenic/Pseudo/Repeaed Region	b0588	ferric enterobactin ABC transporter ATP binding subunit	4763752.0
1	1						22	709250	905	900	19	IS30_IS30	709250	710470.0	NC_000913.3_art_ISs	708349.0	709249.0		710471.0	711371.0	NC_000913.3	682708.0				684509.0	IS only present in query Strain.	1. DLIS	Complete IS hit.	b0650	chaperone protein HscC	-	Intergenic/Pseudo/Repeaed Region	b0650	chaperone protein HscC	-	Intergenic/Pseudo/Repeaed Region	4763752.0
1	1						23	780879	906	900	20	IS30_IS30	780879	782099.0	NC_000913.3_art_ISs	779978.0	780878.0		782100.0	783000.0	NC_000913.3	753116.0				754917.0	IS only present in query Strain.	1. DLIS	Complete IS hit.	-	Intergenic/Pseudo/Repeaed Region	-	Intergenic/Pseudo/Repeaed Region	-	Intergenic/Pseudo/Repeaed Region	-	Intergenic/Pseudo/Repeaed Region	4763752.0
1	1						24	794533	907	900	21	IS30_IS30	794533	795753.0	NC_000913.3_art_ISs	793632.0	794532.0		795754.0	796654.0	NC_000913.3	765549.0				767350.0	IS only present in query Strain.	1. DLIS	Complete IS hit.	b0730	DNA-binding transcriptional repressor MngR	-	Intergenic/Pseudo/Repeaed Region	b0730	DNA-binding transcriptional repressor MngR	b0731	2-O-alpha-mannosyl-D-glycerate specific PTS enzyme II	4763752.0
1	1						25	818746	908	900	22	IS30_IS30	818746	819966.0	NC_000913.3_art_ISs	817845.0	818745.0		819967.0	820867.0	NC_000913.3	788541.0				790342.0	IS only present in query Strain.	1. DLIS	Complete IS hit.	b0756	galactose-1-epimerase	b0758	galactose-1-phosphate uridylyltransferase	b0756	galactose-1-epimerase	b0758	galactose-1-phosphate uridylyltransferase	4763752.0
1	1						26	827842	909	900	23	IS30_IS30	827842	829062.0	NC_000913.3_art_ISs	826941.0	827841.0		829063.0	829963.0	NC_000913.3	796416.0				798217.0	IS only present in query Strain.	1. DLIS	Complete IS hit.	b0764	molybdate ABC transporter membrane subunit	b0766	pyridoxal phosphate/fructose-1;6-bisphosphate phosphatase	b0764	molybdate ABC transporter membrane subunit	b0766	pyridoxal phosphate/fructose-1;6-bisphosphate phosphatase	4763752.0
1	1						27	840349	910	900	24	IS30_IS30	840349	841569.0	NC_000913.3_art_ISs	839448.0	840348.0		841570.0	842470.0	NC_000913.3	807702.0				809503.0	IS only present in query Strain.	1. DLIS	Complete IS hit.	b0773	putative kinase inhibitor	b0775	biotin synthase	b0773	putative kinase inhibitor	b0775	biotin synthase	4763752.0
1	1						28	866245	911	900	25	IS30_IS30	866245	867465.0	NC_000913.3_art_ISs	865344.0	866244.0		867466.0	868366.0	NC_000913.3	832377.0				834178.0	IS only present in query Strain.	1. DLIS	Complete IS hit.	-	Intergenic/Pseudo/Repeaed Region	-	Intergenic/Pseudo/Repeaed Region	-	Intergenic/Pseudo/Repeaed Region	b0799	ATP-dependent DNA helicase DinG	4763752.0
1	1						29	885800	912	900	26	IS30_IS30	885800	887020.0	NC_000913.3_art_ISs	884899.0	885799.0		887021.0	887921.0	NC_000913.3	850711.0				852512.0	IS only present in query Strain.	1. DLIS	Complete IS hit.	b0814	outer membrane protein X	-	Intergenic/Pseudo/Repeaed Region	b0814	outer membrane protein X	b0815	phosphoethanolamine transferase	4763752.0
1	1						30	1054897	913	900	27	IS30_IS30	1054897	1056117.0	NC_000913.3_art_ISs	1053996.0	1054896.0		1056118.0	1057018.0	NC_000913.3	1018587.0				1020388.0	IS only present in query Strain.	1. DLIS	Complete IS hit.	b0956	macrodomain Ter protein	-	Intergenic/Pseudo/Repeaed Region	b0956	macrodomain Ter protein	-	Intergenic/Pseudo/Repeaed Region	4763752.0
1	1						31	1102873	914	900	28	IS30_IS30	1102873	1104093.0	NC_000913.3_art_ISs	1101972.0	1102872.0		1104094.0	1104994.0	NC_000913.3	1065342.0				1067143.0	IS only present in query Strain.	1. DLIS	Complete IS hit.	-	Intergenic/Pseudo/Repeaed Region	b1004	NAD(P)H:quinone oxidoreductase	-	Intergenic/Pseudo/Repeaed Region	b1004	NAD(P)H:quinone oxidoreductase	4763752.0
1	1						32	1118119	915	900	29	IS30_IS30	1118119	1119339.0	NC_000913.3_art_ISs	1117218.0	1118118.0		1119340.0	1120240.0	NC_000913.3	1079367.0				1081168.0	IS only present in query Strain.	1. DLIS	Complete IS hit.	-	Intergenic/Pseudo/Repeaed Region	-	Intergenic/Pseudo/Repeaed Region	b1015	proline:Na(+) symporter	-	Intergenic/Pseudo/Repeaed Region	4763752.0
1	1						33	1150109	916	900	30	IS30_IS30	1150109	1151329.0	NC_000913.3_art_ISs	1149208.0	1150108.0		1151330.0	1152230.0	NC_000913.3	1110136.0				1111937.0	IS only present in query Strain.	1. DLIS	Complete IS hit.	b1048	osmoregulated periplasmic glucans (OPGs) biosynthesis protein G	-	Intergenic/Pseudo/Repeaed Region	b1048	osmoregulated periplasmic glucans (OPGs) biosynthesis protein G	b1049	osmoregulated periplasmic glucans (OPGs) biosynthesis protein H	4763752.0
1	1						34	1165669	917	900	31	IS30_IS30	1165669	1166889.0	NC_000913.3_art_ISs	1164768.0	1165668.0		1166890.0	1167790.0	NC_000913.3	1124475.0				1126276.0	IS only present in query Strain.	1. DLIS	Complete IS hit.	b1065	multidrug efflux pump MdtH	b1067	DUF480 domain-containing protein YceH	b1065	multidrug efflux pump MdtH	b1067	DUF480 domain-containing protein YceH	4763752.0
1	1						35	1252656	918	900	32	IS30_IS30	1252656	1253876.0	NC_000913.3_art_ISs	1251755.0	1252655.0		1253877.0	1254777.0	NC_000913.3	1210241.0				1212042.0	IS only present in query Strain.	1. DLIS	Complete IS hit.	-	Intergenic/Pseudo/Repeaed Region	-	Intergenic/Pseudo/Repeaed Region	-	Intergenic/Pseudo/Repeaed Region	-	Intergenic/Pseudo/Repeaed Region	4763752.0
1	1						36	1314729	919	900	33	IS30_IS30	1314729	1315949.0	NC_000913.3_art_ISs	1313828.0	1314728.0		1315950.0	1316850.0	NC_000913.3	1271093.0				1272894.0	IS only present in query Strain.	1. DLIS	Complete IS hit.	b1216	Na(+)/K(+):H(+) antiporter ChaA	-	Intergenic/Pseudo/Repeaed Region	b1216	Na(+)/K(+):H(+) antiporter ChaA	b1218	glutathione-specific gamma-glutamylcyclotransferase	4763752.0
1	1						37	1316873	920	900	34	IS30_IS30	1316873	1318093.0	NC_000913.3_art_ISs	1315972.0	1316872.0		1318094.0	1318994.0	NC_000913.3	1272016.0				1273817.0	IS only present in query Strain.	1. DLIS	Complete IS hit.	-	Intergenic/Pseudo/Repeaed Region	b1220	putative invasin YchO	-	Intergenic/Pseudo/Repeaed Region	b1220	putative invasin YchO	4763752.0
1	1						38	1332696	921	900	35	IS30_IS30	1332696	1333916.0	NC_000913.3_art_ISs	1331795.0	1332695.0		1333917.0	1334817.0	NC_000913.3	1286618.0				1288419.0	IS only present in query Strain.	1. DLIS	Complete IS hit.	-	Intergenic/Pseudo/Repeaed Region	b1232	formyltetrahydrofolate deformylase	-	Intergenic/Pseudo/Repeaed Region	b1232	formyltetrahydrofolate deformylase	4763752.0
1	1						39	1477755	922	900	36	IS30_IS30	1477755	1478975.0	NC_000913.3_art_ISs	1476854.0	1477754.0		1478976.0	1479876.0	NC_000913.3	1430456.0				1432257.0	IS only present in query Strain.	1. DLIS	Complete IS hit.	-	Intergenic/Pseudo/Repeaed Region	-	Intergenic/Pseudo/Repeaed Region	b1372	Rac prophage; putative membrane protein	b1372	Rac prophage; putative membrane protein	4763752.0
1	1						40	1530090	923	900	37	IS30_IS30	1530090	1531310.0	NC_000913.3_art_ISs	1529189.0	1530089.0		1531311.0	1532211.0	NC_000913.3	1481570.0				1483371.0	IS only present in query Strain.	1. DLIS	Complete IS hit.	b1411	putative phosphatase	b1413	ATP-dependent RNA helicase HrpA	b1411	putative phosphatase	b1413	ATP-dependent RNA helicase HrpA	4763752.0
	1			1			41	1599338	924	900	93	IS30_IS30	1599338	1600558.0	NC_000913.3_art_ISs	1598437.0	1599337.0		1600559.0	1601459.0							IS only present in query Strain.	2. Verify manually, possible false positive caused by consecutive ISs.		b1474	formate dehydrogenase N subunit alpha	-	Intergenic/Pseudo/Repeaed Region	-	-	-	-	4763752.0
	1			1			42	1601001	925	900	94	IS30_IS30	1601001	1602221.0	NC_000913.3_art_ISs	1600100.0	1601000.0		1602222.0	1603122.0							IS only present in query Strain.	2. Verify manually, possible false positive caused by consecutive ISs.		-	Intergenic/Pseudo/Repeaed Region	b1476	formate dehydrogenase N subunit gamma	-	-	-	-	4763752.0
1	1						43	1614176	926	900	38	IS30_IS30	1614176	1615396.0	NC_000913.3_art_ISs	1613275.0	1614175.0		1615397.0	1616297.0	NC_000913.3	1561993.0				1563794.0	IS only present in query Strain.	1. DLIS	Complete IS hit.	b1487	putative D;D-dipeptide ABC transporter periplasmic binding protein	b1489	oxygen-sensing c-di-GMP phosphodiesterase DosP	b1487	putative D;D-dipeptide ABC transporter periplasmic binding protein	b1489	oxygen-sensing c-di-GMP phosphodiesterase DosP	4763752.0
1	1						44	1700984	927	900	39	IS30_IS30	1700984	1702204.0	NC_000913.3_art_ISs	1700083.0	1700983.0		1702205.0	1703105.0	NC_000913.3	1647580.0				1649381.0	IS only present in query Strain.	1. DLIS	Complete IS hit.	b1568	Qin prophage; uncharacterized protein YdfX	-	Intergenic/Pseudo/Repeaed Region	b1568	Qin prophage; uncharacterized protein YdfX	-	Intergenic/Pseudo/Repeaed Region	4763752.0
1	1						45	1724977	928	900	40	IS30_IS30	1724977	1726197.0	NC_000913.3_art_ISs	1724076.0	1724976.0		1726198.0	1727098.0	NC_000913.3	1670352.0				1672153.0	IS only present in query Strain.	1. DLIS	Complete IS hit.	b1596	putative transporter YnfM	b1598	putative serine protease YdgD	b1596	putative transporter YnfM	b1598	putative serine protease YdgD	4763752.0
1	1						46	1739082	929	900	41	IS30_IS30	1739082	1740302.0	NC_000913.3_art_ISs	1738181.0	1739081.0		1740303.0	1741203.0	NC_000913.3	1683236.0				1685037.0	IS only present in query Strain.	1. DLIS	Complete IS hit.	-	Intergenic/Pseudo/Repeaed Region	b1610	DNA replication terminus site-binding protein	b1609	sensory histidine kinase RstB	b1610	DNA replication terminus site-binding protein	4763752.0
1	1						47	1744580	930	900	42	IS30_IS30	1744580	1745800.0	NC_000913.3_art_ISs	1743679.0	1744579.0		1745801.0	1746701.0	NC_000913.3	1687513.0				1689314.0	IS only present in query Strain.	1. DLIS	Complete IS hit.	b1612	fumarase A	b1613	mannose-6-phosphate isomerase	b1612	fumarase A	b1613	mannose-6-phosphate isomerase	4763752.0
1	1						48	1763370	931	900	43	IS30_IS30	1763370	1764590.0	NC_000913.3_art_ISs	1762469.0	1763369.0		1764591.0	1765491.0	NC_000913.3	1705082.0				1706883.0	IS only present in query Strain.	1. DLIS	Complete IS hit.	b1625	H-NS- and StpA-binding protein	b1628	SoxR [2Fe-2S] reducing system protein RsxB	b1625	H-NS- and StpA-binding protein	b1628	SoxR [2Fe-2S] reducing system protein RsxB	4763752.0
1	1						49	1767126	932	900	44	IS30_IS30	1767126	1768346.0	NC_000913.3_art_ISs	1766225.0	1767125.0		1768347.0	1769247.0	NC_000913.3	1707617.0				1709418.0	IS only present in query Strain.	1. DLIS	Complete IS hit.	-	Intergenic/Pseudo/Repeaed Region	b1630	SoxR [2Fe-2S] reducing system protein RsxD	b1629	SoxR [2Fe-2S] reducing system protein RsxC	b1630	SoxR [2Fe-2S] reducing system protein RsxD	4763752.0
1	1						50	1803050	933	900	45	IS30_IS30	1803050	1804270.0	NC_000913.3_art_ISs	1802149.0	1803049.0		1804271.0	1805171.0	NC_000913.3	1742320.0				1744121.0	IS only present in query Strain.	1. DLIS	Complete IS hit.	b1661	cyclopropane fatty acyl phospholipid synthase	b1663	multidrug efflux pump MdtK	b1661	cyclopropane fatty acyl phospholipid synthase	b1663	multidrug efflux pump MdtK	4763752.0
	1			1			51	1869279	934	900	95	IS30_IS30	1869279	1870499.0	NC_000913.3_art_ISs	1868378.0	1869278.0		1870500.0	1871400.0							IS only present in query Strain.	2. Verify manually, possible false positive caused by consecutive ISs.		-	Intergenic/Pseudo/Repeaed Region	-	Intergenic/Pseudo/Repeaed Region	-	-	-	-	4763752.0
	1			1			52	1870520	935	900	96	IS30_IS30	1870520	1871740.0	NC_000913.3_art_ISs	1869619.0	1870519.0		1871741.0	1872641.0							IS only present in query Strain.	2. Verify manually, possible false positive caused by consecutive ISs.		-	Intergenic/Pseudo/Repeaed Region	b1726	uncharacterized protein YniB	-	-	-	-	4763752.0
1	1						53	1904586	936	900	46	IS30_IS30	1904586	1905806.0	NC_000913.3_art_ISs	1903685.0	1904585.0		1905807.0	1906707.0	NC_000913.3	1840193.0				1841994.0	IS only present in query Strain.	1. DLIS	Complete IS hit.	b1757	molybdopterin synthase sulfurtransferase	b1760	DUF1496 domain-containing protein YnjH	b1757	molybdopterin synthase sulfurtransferase	b1760	DUF1496 domain-containing protein YnjH	4763752.0
1	1						54	1932848	937	900	47	IS30_IS30	1932848	1934068.0	NC_000913.3_art_ISs	1931947.0	1932847.0		1934069.0	1934969.0	NC_000913.3	1867234.0				1869035.0	IS only present in query Strain.	1. DLIS	Complete IS hit.	-	Intergenic/Pseudo/Repeaed Region	b1784	DUF444 domain-containing protein YeaH	b1783	protein kinase YeaG	b1784	DUF444 domain-containing protein YeaH	4763752.0
1	1						55	1937860	938	900	48	IS30_IS30	1937860	1939080.0	NC_000913.3_art_ISs	1936959.0	1937859.0		1939081.0	1939981.0	NC_000913.3	1871025.0				1872826.0	IS only present in query Strain.	1. DLIS	Complete IS hit.	b1785	putative c-di-GMP binding protein CdgI	b1786	putative diguanylate cyclase DgcJ	b1785	putative c-di-GMP binding protein CdgI	b1786	putative diguanylate cyclase DgcJ	4763752.0
1	1						56	2146825	939	900	49	IS30_IS30	2146825	2148045.0	NC_000913.3_art_ISs	2145924.0	2146824.0		2148046.0	2148946.0	NC_000913.3	2078769.0				2080570.0	IS only present in query Strain.	1. DLIS	Complete IS hit.	b4538	CP4-44 prophage; putative uncharacterized protein YoeF	-	Intergenic/Pseudo/Repeaed Region	b4538	CP4-44 prophage; putative uncharacterized protein YoeF	b2008	putative transporter YeeA	4763752.0
1	1						57	2291220	940	900	50	IS30_IS30	2291220	2292440.0	NC_000913.3_art_ISs	2290319.0	2291219.0		2292441.0	2293341.0	NC_000913.3	2221943.0				2223744.0	IS only present in query Strain.	1. DLIS	Complete IS hit.	b2132	beta-D-glucoside glucohydrolase; periplasmic	-	Intergenic/Pseudo/Repeaed Region	b2132	beta-D-glucoside glucohydrolase; periplasmic	b2133	D-lactate dehydrogenase	4763752.0
1	1						58	2302324	941	900	51	IS30_IS30	2302324	2303544.0	NC_000913.3_art_ISs	2301423.0	2302323.0		2303545.0	2304445.0	NC_000913.3	2231826.0				2233627.0	IS only present in query Strain.	1. DLIS	Complete IS hit.	-	Intergenic/Pseudo/Repeaed Region	b2145	DUF2542 domain-containing protein YeiS	-	Intergenic/Pseudo/Repeaed Region	b2145	DUF2542 domain-containing protein YeiS	4763752.0
1	1						59	2305151	942	900	52	IS30_IS30	2305151	2306371.0	NC_000913.3_art_ISs	2304250.0	2305150.0		2306372.0	2307272.0	NC_000913.3	2233432.0				2235233.0	IS only present in query Strain.	1. DLIS	Complete IS hit.	b2144	DUF218 domain-containing protein SanA	-	Intergenic/Pseudo/Repeaed Region	b2144	DUF218 domain-containing protein SanA	b2146	NAD-dependent dihydropyrimidine dehydrogenase subunit PreT	4763752.0
	1			1			60	2314302	943	900	97	IS30_IS30	2314302	2315125.0	NC_000913.3_art_ISs	2313401.0	2314301.0		2315126.0	2316026.0							IS only present in query Strain.	2. Verify manually, possible false positive caused by consecutive ISs.	Partial IS hit.	b2151	DNA-binding transcriptional dual regulator GalS	-	Intergenic/Pseudo/Repeaed Region	-	-	-	-	4763752.0
	1			1			61	2315125	944	900	98	IS30_IS30	2315125	2315756.0	NC_000913.3_art_ISs	2314224.0	2315124.0		2315757.0	2316657.0							IS only present in query Strain.	2. Verify manually, possible false positive caused by consecutive ISs.	Partial IS hit.	-	Intergenic/Pseudo/Repeaed Region	-	Intergenic/Pseudo/Repeaed Region	-	-	-	-	4763752.0
	1			1			62	2315757	945	900	99	IS30_IS30	2315757	2316977.0	NC_000913.3_art_ISs	2314856.0	2315756.0		2316978.0	2317878.0							IS only present in query Strain.	2. Verify manually, possible false positive caused by consecutive ISs.		-	Intergenic/Pseudo/Repeaed Region	-	Intergenic/Pseudo/Repeaed Region	-	-	-	-	4763752.0
1	1						63	2331004	946	900	53	IS30_IS30	2331004	2332224.0	NC_000913.3_art_ISs	2330103.0	2331003.0		2332225.0	2333125.0	NC_000913.3	2254401.0				2256202.0	IS only present in query Strain.	1. DLIS	Complete IS hit.	b2162	pyrimidine-specific ribonucleoside hydrolase RihB	b2164	putative pseudouridine transporter	b2162	pyrimidine-specific ribonucleoside hydrolase RihB	b2164	putative pseudouridine transporter	4763752.0
1	1						64	2338335	947	900	54	IS30_IS30	2338335	2339555.0	NC_000913.3_art_ISs	2337434.0	2338334.0		2339556.0	2340456.0	NC_000913.3	2260511.0				2262312.0	IS only present in query Strain.	1. DLIS	Complete IS hit.	b2167	fructose-specific PTS multiphosphoryl transfer protein FruA	b2168	1-phosphofructokinase	b2167	fructose-specific PTS multiphosphoryl transfer protein FruA	b2168	1-phosphofructokinase	4763752.0
1	1						65	2415048	948	900	55	IS30_IS30	2415048	2416268.0	NC_000913.3_art_ISs	2414147.0	2415047.0		2416269.0	2417169.0	NC_000913.3	2336003.0				2337804.0	IS only present in query Strain.	1. DLIS	Complete IS hit.	b2230	DUF2138 domain-containing protein YfaA	-	Intergenic/Pseudo/Repeaed Region	b2230	DUF2138 domain-containing protein YfaA	b2231	DNA gyrase subunit A	4763752.0
1	1						66	2462961	949	900	56	IS30_IS30	2462961	2464181.0	NC_000913.3_art_ISs	2462060.0	2462960.0		2464182.0	2465082.0	NC_000913.3	2382695.0				2384496.0	IS only present in query Strain.	1. DLIS	Complete IS hit.	-	Intergenic/Pseudo/Repeaed Region	b2270	IPR002035/DUF3520 domain-containing protein YfbK	-	Intergenic/Pseudo/Repeaed Region	b2270	IPR002035/DUF3520 domain-containing protein YfbK	4763752.0
1	1						67	2528130	950	900	57	IS30_IS30	2528130	2529350.0	NC_000913.3_art_ISs	2527229.0	2528129.0		2529351.0	2530251.0	NC_000913.3	2446643.0				2448444.0	IS only present in query Strain.	1. DLIS	Complete IS hit.	b2329	chorismate synthase	-	Intergenic/Pseudo/Repeaed Region	b2329	chorismate synthase	-	Intergenic/Pseudo/Repeaed Region	4763752.0
1	1						68	2951446	951	900	58	IS30_IS30	2951446	2952666.0	NC_000913.3_art_ISs	2950545.0	2951445.0		2952667.0	2953567.0	NC_000913.3	2868738.0				2870539.0	IS only present in query Strain.	1. DLIS	Complete IS hit.	b2742	murein hydrolase activator NlpD	b2745	tRNA pseudouridine(13) synthase	b2742	murein hydrolase activator NlpD	b2745	tRNA pseudouridine(13) synthase	4763752.0
1	1						69	2954441	952	900	59	IS30_IS30	2954441	2955661.0	NC_000913.3_art_ISs	2953540.0	2954440.0		2955662.0	2956562.0	NC_000913.3	2870512.0				2872313.0	IS only present in query Strain.	1. DLIS	Complete IS hit.	b2745	tRNA pseudouridine(13) synthase	b2747	2-C-methyl-D-erythritol 4-phosphate cytidylyltransferase	b2745	tRNA pseudouridine(13) synthase	b2747	2-C-methyl-D-erythritol 4-phosphate cytidylyltransferase	4763752.0
1	1						70	2983613	953	900	60	IS30_IS30	2983613	2984833.0	NC_000913.3_art_ISs	2982712.0	2983612.0		2984834.0	2985734.0	NC_000913.3	2898463.0				2900264.0	IS only present in query Strain.	1. DLIS	Complete IS hit.	-	Intergenic/Pseudo/Repeaed Region	b2774	putative deoxygluconate dehydrogenase	b4463	putative FAD-containing dehydrogenase	b2774	putative deoxygluconate dehydrogenase	4763752.0
1	1						71	3057300	954	900	61	IS30_IS30	3057300	3058520.0	NC_000913.3_art_ISs	3056399.0	3057299.0		3058521.0	3059421.0	NC_000913.3	2970929.0				2972730.0	IS only present in query Strain.	1. DLIS	Complete IS hit.	b2832	UPF0053 inner membrane protein YgdQ	b2835	lysophospholipid transporter	b2832	UPF0053 inner membrane protein YgdQ	b2835	lysophospholipid transporter	4763752.0
1	1						72	3104435	955	900	62	IS30_IS30	3104435	3105655.0	NC_000913.3_art_ISs	3103534.0	3104434.0		3105656.0	3106556.0	NC_000913.3	3016843.0				3018644.0	IS only present in query Strain.	1. DLIS	Complete IS hit.	-	Intergenic/Pseudo/Repeaed Region	-	Intergenic/Pseudo/Repeaed Region	b2878	putative oxidoreductase; Fe-S subunit	b2878	putative oxidoreductase; Fe-S subunit	4763752.0
1	1						73	3137784	956	900	63	IS30_IS30	3137784	3139004.0	NC_000913.3_art_ISs	3136883.0	3137783.0		3139005.0	3139905.0	NC_000913.3	3048971.0				3050772.0	IS only present in query Strain.	1. DLIS	Complete IS hit.	b2903	glycine decarboxylase	-	Intergenic/Pseudo/Repeaed Region	b2903	glycine decarboxylase	-	Intergenic/Pseudo/Repeaed Region	4763752.0
1	1						74	3161238	957	900	64	IS30_IS30	3161238	3162458.0	NC_000913.3_art_ISs	3160337.0	3161237.0		3162459.0	3163359.0	NC_000913.3	3071204.0				3073005.0	IS only present in query Strain.	1. DLIS	Complete IS hit.	b2925	fructose-bisphosphate aldolase class II	b2927	D-erythrose-4-phosphate dehydrogenase	b2925	fructose-bisphosphate aldolase class II	b2927	D-erythrose-4-phosphate dehydrogenase	4763752.0
1	1						75	3226249	958	900	65	IS30_IS30	3226249	3227469.0	NC_000913.3_art_ISs	3225348.0	3226248.0		3227470.0	3228370.0	NC_000913.3	3134994.0				3136795.0	IS only present in query Strain.	1. DLIS	Complete IS hit.	-	Intergenic/Pseudo/Repeaed Region	b2988	fused glutathionylspermidine amidase/glutathionylspermidine synthetase	b2987	metal phosphate:H(+) symporter PitB	b2988	fused glutathionylspermidine amidase/glutathionylspermidine synthetase	4763752.0
1	1						76	3361527	959	900	66	IS30_IS30	3361527	3362747.0	NC_000913.3_art_ISs	3360626.0	3361526.0		3362748.0	3363648.0	NC_000913.3	3269051.0				3270852.0	IS only present in query Strain.	1. DLIS	Complete IS hit.	b3121	uncharacterized protein YhaC	b3124	glycerate 2-kinase 1	b3121	uncharacterized protein YhaC	b3124	glycerate 2-kinase 1	4763752.0
1	1						77	3386688	960	900	67	IS30_IS30	3386688	3387908.0	NC_000913.3_art_ISs	3385787.0	3386687.0		3387909.0	3388809.0	NC_000913.3	3292991.0				3294792.0	IS only present in query Strain.	1. DLIS	Complete IS hit.	b3146	16S rRNA 2'-O-ribose C1402 methyltransferase	-	Intergenic/Pseudo/Repeaed Region	b3146	16S rRNA 2'-O-ribose C1402 methyltransferase	b3147	outer membrane lipoprotein - activator of MrcA activity	4763752.0
1	1						78	3441448	961	900	68	IS30_IS30	3441448	3442668.0	NC_000913.3_art_ISs	3440547.0	3441447.0		3442669.0	3443569.0	NC_000913.3	3346530.0				3348331.0	IS only present in query Strain.	1. DLIS	Complete IS hit.	-	Intergenic/Pseudo/Repeaed Region	-	Intergenic/Pseudo/Repeaed Region	-	Intergenic/Pseudo/Repeaed Region	-	Intergenic/Pseudo/Repeaed Region	4763752.0
1	1						79	3596382	962	900	69	IS30_IS30	3596382	3597602.0	NC_000913.3_art_ISs	3595481.0	3596381.0		3597603.0	3598503.0	NC_000913.3	3500243.0				3502044.0	IS only present in query Strain.	1. DLIS	Complete IS hit.	-	Intergenic/Pseudo/Repeaed Region	b3371	fructoselysine 6-phosphate deglycase	b3370	fructoselysine/psicoselysine transporter	b3371	fructoselysine 6-phosphate deglycase	4763752.0
1	1						80	3615538	963	900	70	IS30_IS30	3615538	3616758.0	NC_000913.3_art_ISs	3614637.0	3615537.0		3616759.0	3617659.0	NC_000913.3	3518178.0				3519979.0	IS only present in query Strain.	1. DLIS	Complete IS hit.	b3389	3-dehydroquinate synthase	-	Intergenic/Pseudo/Repeaed Region	b3389	3-dehydroquinate synthase	b3391	DNA utilization protein HofQ	4763752.0
1	1						81	3617769	964	900	71	IS30_IS30	3617769	3618989.0	NC_000913.3_art_ISs	3616868.0	3617768.0		3618990.0	3619890.0	NC_000913.3	3519188.0				3520989.0	IS only present in query Strain.	1. DLIS	Complete IS hit.	-	Intergenic/Pseudo/Repeaed Region	b3392	DNA utilization protein HofP	-	Intergenic/Pseudo/Repeaed Region	b3392	DNA utilization protein HofP	4763752.0
1	1						82	3654946	965	900	72	IS30_IS30	3654946	3656166.0	NC_000913.3_art_ISs	3654045.0	3654945.0		3656167.0	3657067.0	NC_000913.3	3555144.0				3556945.0	IS only present in query Strain.	1. DLIS	Complete IS hit.	b3418	DNA-binding transcriptional activator MalT	-	Intergenic/Pseudo/Repeaed Region	b3418	DNA-binding transcriptional activator MalT	b3421	RNA-splicing ligase	4763752.0
1	1						83	3658126	966	900	73	IS30_IS30	3658126	3659346.0	NC_000913.3_art_ISs	3657225.0	3658125.0		3659347.0	3660247.0	NC_000913.3	3557103.0				3558904.0	IS only present in query Strain.	1. DLIS	Complete IS hit.	-	Intergenic/Pseudo/Repeaed Region	b3422	DNA-binding transcriptional activator RtcR	b3421	RNA-splicing ligase	b3422	DNA-binding transcriptional activator RtcR	4763752.0
1	1						84	3727323	967	900	74	IS30_IS30	3727323	3728543.0	NC_000913.3_art_ISs	3726422.0	3727322.0		3728544.0	3729444.0	NC_000913.3	3625079.0				3626880.0	IS only present in query Strain.	1. DLIS	Complete IS hit.	b3484	putative transposase	b3486	ribosome-associated ATPase	b3484	putative transposase	b3486	ribosome-associated ATPase	4763752.0
1	1						85	3766127	968	900	75	IS30_IS30	3766127	3767347.0	NC_000913.3_art_ISs	3765226.0	3766126.0		3767348.0	3768248.0	NC_000913.3	3662662.0				3664463.0	IS only present in query Strain.	1. DLIS	Complete IS hit.	b3514	multidrug efflux pump RND permease MdtF	b3515	DNA-binding transcriptional dual regulator GadW	b3514	multidrug efflux pump RND permease MdtF	b3515	DNA-binding transcriptional dual regulator GadW	4763752.0
1	1						86	3798695	969	900	76	IS30_IS30	3798695	3799915.0	NC_000913.3_art_ISs	3797794.0	3798694.0		3799916.0	3800816.0	NC_000913.3	3694009.0				3695810.0	IS only present in query Strain.	1. DLIS	Complete IS hit.	-	Intergenic/Pseudo/Repeaed Region	b3534	cellulose biosynthesis protein	b3533	cellulose synthase catalytic subunit	b3534	cellulose biosynthesis protein	4763752.0
1	1						87	3900620	970	900	77	IS30_IS30	3900620	3901840.0	NC_000913.3_art_ISs	3899719.0	3900619.0		3901841.0	3902741.0	NC_000913.3	3794713.0				3796514.0	IS only present in query Strain.	1. DLIS	Complete IS hit.	b3619	ADP-L-glycero-D-mannoheptose 6-epimerase	b3621	ADP-heptose:LPS heptosyltransferase 1	b3619	ADP-L-glycero-D-mannoheptose 6-epimerase	b3621	ADP-heptose:LPS heptosyltransferase 1	4763752.0
1	1						88	4006509	971	900	78	IS30_IS30	4006509	4007729.0	NC_000913.3_art_ISs	4005608.0	4006508.0		4007730.0	4008630.0	NC_000913.3	3899381.0				3901182.0	IS only present in query Strain.	1. DLIS	Complete IS hit.	b3718	putative glucosamine-6-phosphate deaminase YieK	b3720	carbohydrate-specific outer membrane porin; cryptic	b3718	putative glucosamine-6-phosphate deaminase YieK	b3720	carbohydrate-specific outer membrane porin; cryptic	4763752.0
1	1						89	4013286	972	900	79	IS30_IS30	4013286	4014506.0	NC_000913.3_art_ISs	4012385.0	4013285.0		4014507.0	4015407.0	NC_000913.3	3904937.0				3906738.0	IS only present in query Strain.	1. DLIS	Complete IS hit.	b3722	beta-glucoside specific PTS enzyme II/BglG kinase/BglG phosphatase	-	Intergenic/Pseudo/Repeaed Region	b3722	beta-glucoside specific PTS enzyme II/BglG kinase/BglG phosphatase	-	Intergenic/Pseudo/Repeaed Region	4763752.0
1	1						90	4027534	973	900	80	IS30_IS30	4027534	4028754.0	NC_000913.3_art_ISs	4026633.0	4027533.0		4028755.0	4029655.0	NC_000913.3	3917964.0				3919765.0	IS only present in query Strain.	1. DLIS	Complete IS hit.	b3733	ATP synthase F1 complex subunit gamma	-	Intergenic/Pseudo/Repeaed Region	b3733	ATP synthase F1 complex subunit gamma	b3734	ATP synthase F1 complex subunit alpha	4763752.0
1	1						91	4248889	974	900	81	IS30_IS30	4248889	4250109.0	NC_000913.3_art_ISs	4247988.0	4248888.0		4250110.0	4251010.0	NC_000913.3	4138098.0				4139899.0	IS only present in query Strain.	1. DLIS	Complete IS hit.	-	Intergenic/Pseudo/Repeaed Region	b3947	putative PTS multiphosphoryl transfer protein PtsA	b3945	L-1;2-propanediol dehydrogenase/glycerol dehydrogenase	b3947	putative PTS multiphosphoryl transfer protein PtsA	4763752.0
1	1						92	4260696	975	900	82	IS30_IS30	4260696	4261916.0	NC_000913.3_art_ISs	4259795.0	4260695.0		4261917.0	4262817.0	NC_000913.3	4148684.0				4150485.0	IS only present in query Strain.	1. DLIS	Complete IS hit.	-	Intergenic/Pseudo/Repeaed Region	-	Intergenic/Pseudo/Repeaed Region	b3955	phosphoethanolamine transferase EptC	b3956	phosphoenolpyruvate carboxylase	4763752.0
1	1						93	4264502	976	900	83	IS30_IS30	4264502	4265722.0	NC_000913.3_art_ISs	4263601.0	4264501.0		4265723.0	4266623.0	NC_000913.3	4151269.0				4153070.0	IS only present in query Strain.	1. DLIS	Complete IS hit.	-	Intergenic/Pseudo/Repeaed Region	-	Intergenic/Pseudo/Repeaed Region	b3956	phosphoenolpyruvate carboxylase	b3956	phosphoenolpyruvate carboxylase	4763752.0
1	1						94	4311821	977	900	84	IS30_IS30	4311821	4313041.0	NC_000913.3_art_ISs	4310920.0	4311820.0		4313042.0	4313942.0	NC_000913.3	4197367.0				4199168.0	IS only present in query Strain.	1. DLIS	Complete IS hit.	b3996	NADH pyrophosphatase	b3998	endonuclease V	b3996	NADH pyrophosphatase	b3998	endonuclease V	4763752.0
1	1						95	4389275	978	900	85	IS30_IS30	4389275	4390495.0	NC_000913.3_art_ISs	4388374.0	4389274.0		4390496.0	4391396.0	NC_000913.3	4273600.0				4275401.0	IS only present in query Strain.	1. DLIS	Complete IS hit.	b4058	excision nuclease subunit A	-	Intergenic/Pseudo/Repeaed Region	b4058	excision nuclease subunit A	-	Intergenic/Pseudo/Repeaed Region	4763752.0
1	1						96	4434397	979	900	86	IS30_IS30	4434397	4435617.0	NC_000913.3_art_ISs	4433496.0	4434396.0		4435618.0	4436518.0	NC_000913.3	4317501.0				4319302.0	IS only present in query Strain.	1. DLIS	Complete IS hit.	b4096	methylphosphonate degradation complex subunit PhnL	b4098	carbon-phosphorus lyase core complex subunit PhnJ	b4096	methylphosphonate degradation complex subunit PhnL	b4098	carbon-phosphorus lyase core complex subunit PhnJ	4763752.0
	1			1			97	4461112	980	900	102	IS30_IS30	4461112	4461482.0	NC_000913.3_art_ISs	4460211.0	4461111.0		4461483.0	4462383.0							IS only present in query Strain.	2. Verify manually, possible false positive caused by consecutive ISs.	Partial IS hit.	b4119	alpha-galactosidase	-	Intergenic/Pseudo/Repeaed Region	-	-	-	-	4763752.0
	1			1			98	4461481	981	900	103	IS30_IS30	4461481	4462701.0	NC_000913.3_art_ISs	4460580.0	4461480.0		4462702.0	4463602.0							IS only present in query Strain.	2. Verify manually, possible false positive caused by consecutive ISs.		-	Intergenic/Pseudo/Repeaed Region	-	Intergenic/Pseudo/Repeaed Region	-	-	-	-	4763752.0
1	1						99	4509587	982	900	87	IS30_IS30	4509587	4510807.0	NC_000913.3_art_ISs	4508686.0	4509586.0		4510808.0	4511708.0	NC_000913.3	4389028.0				4390829.0	IS only present in query Strain.	1. DLIS	Complete IS hit.	b4159	miniconductance mechanosensitive channel MscM	b4161	ribosome small subunit-dependent GTPase A	b4159	miniconductance mechanosensitive channel MscM	b4161	ribosome small subunit-dependent GTPase A	4763752.0
1	1						100	4524761	983	900	88	IS30_IS30	4524761	4525981.0	NC_000913.3_art_ISs	4523860.0	4524760.0		4525982.0	4526882.0	NC_000913.3	4402981.0				4404782.0	IS only present in query Strain.	1. DLIS	Complete IS hit.	b4174	regulator of FtsH protease	b4177	adenylosuccinate synthetase	b4174	regulator of FtsH protease	b4177	adenylosuccinate synthetase	4763752.0
			1						984	900	90	IS30_IS30	249701	250822.0	NC_000913.3_art_ISs	248800.0	249700.0		250823.0	251723.0							IS only present in query Strain.	2. Verify manually, possible false positive caused by consecutive ISs.	Partial IS hit.	-	Intergenic/Pseudo/Repeaed Region	-	Intergenic/Pseudo/Repeaed Region	-	-	-	-	4763752.0
			1						985	900	91	ISEc1_ISAs1	736682	737971.0	NC_000913.3_art_ISs	762643.0				764453.0	NC_000913.3	735781.0	736681.0		737972.0	738872.0	IS only present in ref Strain.	2. Verify manually, possible false positive caused by consecutive ISs.	Complete IS hit.	b0704	uncharacterized protein YbfC	b0705	putative transposase YbfL	b0681	chitobiose outer membrane channel	b0684	flavodoxin 1	4641652.0
			1						986	900	92	ISEc1_ISAs1	763544	764833.0	NC_000913.3_art_ISs	762643.0	763543.0		764834.0	765734.0	NC_000913.3	735781.0				737591.0	IS only present in query Strain.	2. Verify manually, possible false positive caused by consecutive ISs.	Complete IS hit.	b0704	uncharacterized protein YbfC	-	Intergenic/Pseudo/Repeaed Region	b0704	uncharacterized protein YbfC	b0705	putative transposase YbfL	4763752.0
			1						987	900	100	IS30_IS30	2316971	2317566.0	NC_000913.3_art_ISs	2316070.0	2316970.0		2317567.0	2318467.0							IS only present in query Strain.	2. Verify manually, possible false positive caused by consecutive ISs.	Partial IS hit.	-	Intergenic/Pseudo/Repeaed Region	-	Intergenic/Pseudo/Repeaed Region	-	-	-	-	4763752.0
			1						988	900	101	IS30_IS30	2317567	2317964.0	NC_000913.3_art_ISs	2316666.0	2317566.0		2317965.0	2318865.0							IS only present in query Strain.	2. Verify manually, possible false positive caused by consecutive ISs.	Partial IS hit.	-	Intergenic/Pseudo/Repeaed Region	b2153	GTP cyclohydrolase 1	-	-	-	-	4763752.0
			1						989	900	104	IS30_IS30	4462702	4463553.0	NC_000913.3_art_ISs	4461801.0	4462701.0		4463554.0	4464454.0							IS only present in query Strain.	2. Verify manually, possible false positive caused by consecutive ISs.	Partial IS hit.	-	Intergenic/Pseudo/Repeaed Region	-	Intergenic/Pseudo/Repeaed Region	-	-	-	-	4763752.0
			1						990	900	105	IS2_IS2_IS3	399833	400905.0	NC_000913.3_art_ISs	398932.0	399832.0		400906.0	401806.0							IS only present in query Strain.	5. Discarded for analysis. There were multiple blastn hits, and left and right pairs could not be determined.	Partial IS hit.	-	Intergenic/Pseudo/Repeaed Region	b0363	putative glucosyltransferase	-	-	-	-	4763752.0
			1						991	900	106	MITEEc1_IS630	3071273	3071395.0	NC_000913.3_art_ISs	3160527.0	3161237.0				NC_000913.3	3070372.0	3071272.0		3071396.0	3072296.0	IS only present in ref Strain.	5. Discarded for analysis. There were multiple blastn hits, and left and right pairs could not be determined.		-	Intergenic/Pseudo/Repeaed Region	-	-	b2843	5-dehydro-4-deoxy-D-glucuronate isomerase	b2844	putative acyltransferase	4641652.0
			1						992	900	107	MITEEc1_IS630	3160406	3160528.0	NC_000913.3_art_ISs	3159505.0	3160405.0		3160529.0	3161429.0	NC_000913.3	3071394.0	3072104.0				IS only present in query Strain.	5. Discarded for analysis. There were multiple blastn hits, and left and right pairs could not be determined.		b2925	fructose-bisphosphate aldolase class II	-	Intergenic/Pseudo/Repeaed Region	b2926	phosphoglycerate kinase	-	-	4763752.0
			1						993	900	108	ISEc1_ISAs1	3725577	3726867.0	NC_000913.3_art_ISs	3724676.0	3725576.0		3726868.0	3727768.0							IS only present in query Strain.	5. Discarded for analysis. There were multiple blastn hits, and left and right pairs could not be determined.		b3482	rhs element protein RhsB	-	Intergenic/Pseudo/Repeaed Region	-	-	-	-	4763752.0
			1						994	900	109	ISEc1_ISAs1	3624234	3625524.0							NC_000913.3	3623333.0	3624233.0		3625525.0	3626425.0	IS only present in ref Strain.	5. Discarded for analysis. There were multiple blastn hits, and left and right pairs could not be determined.		-	-	-	-	b3482	rhs element protein RhsB	b3485	ABC transporter family protein YhhJ	4641652.0
89	99	0	11	11	1	*			995	900
1	1						1	446	996	1000	0	IS30_IS30	446	1666.0	NC_000913.3_art_ISs	1.0	445.0		1667.0	2667.0	NC_000913.3	1.0				1446.0	IS only present in query Strain.	1. DLIS	Complete IS hit.	-	Intergenic/Pseudo/Repeaed Region	-	Intergenic/Pseudo/Repeaed Region	-	Intergenic/Pseudo/Repeaed Region	b0002	fused aspartate kinase/homoserine dehydrogenase 1	4763752.0
1	1						2	3160	997	1000	1	IS30_IS30	3160	4380.0	NC_000913.3_art_ISs	2159.0	3159.0		4381.0	5381.0	NC_000913.3	938.0				2939.0	IS only present in query Strain.	1. DLIS	Complete IS hit.	-	Intergenic/Pseudo/Repeaed Region	b0003	homoserine kinase	b0002	fused aspartate kinase/homoserine dehydrogenase 1	b0003	homoserine kinase	4763752.0
1	1						3	123711	998	1000	2	IS30_IS30	123711	124931.0	NC_000913.3_art_ISs	122710.0	123710.0		124932.0	125932.0	NC_000913.3	120268.0				122269.0	IS only present in query Strain.	1. DLIS	Complete IS hit.	-	Intergenic/Pseudo/Repeaed Region	b0113	DNA-binding transcriptional dual regulator PdhR	b0112	aromatic amino acid:H(+) symporter AroP	b0113	DNA-binding transcriptional dual regulator PdhR	4763752.0
1	1						4	142989	999	1000	3	IS30_IS30	142989	144209.0	NC_000913.3_art_ISs	141988.0	142988.0		144210.0	145210.0	NC_000913.3	138325.0				140326.0	IS only present in query Strain.	1. DLIS	Complete IS hit.	b0123	cuprous oxidase/multicopper oxidase with role in copper homeostasis	-	Intergenic/Pseudo/Repeaed Region	b0123	cuprous oxidase/multicopper oxidase with role in copper homeostasis	b0124	quinoprotein glucose dehydrogenase	4763752.0
1	1						5	163498	1000	1000	4	IS30_IS30	163498	164718.0	NC_000913.3_art_ISs	162497.0	163497.0		164719.0	165719.0	NC_000913.3	157613.0				159614.0	IS only present in query Strain.	1. DLIS	Complete IS hit.	b0142	2-amino-4-hydroxy-6- hydroxymethyldihydropteridine diphosphokinase	b0144	glutamyl-Q tRNA(Asp) synthetase	b0142	2-amino-4-hydroxy-6- hydroxymethyldihydropteridine diphosphokinase	b0144	glutamyl-Q tRNA(Asp) synthetase	4763752.0
1	1						6	240046	1001	1000	5	IS30_IS30	240046	241266.0	NC_000913.3_art_ISs	239045.0	240045.0		241267.0	242267.0	NC_000913.3	232940.0				234941.0	IS only present in query Strain.	1. DLIS	Complete IS hit.	-	Intergenic/Pseudo/Repeaed Region	b0213	putative S-adenosyl-L-methionine-dependent methyltransferase	b0211	membrane-bound lytic murein transglycosylase D	b0213	putative S-adenosyl-L-methionine-dependent methyltransferase	4763752.0
				1	1		7	248381	1002	1000
	1			1			8	248480	1003	1000	89	IS30_IS30	248480	249700.0	NC_000913.3_art_ISs	247479.0	248479.0		249701.0	250701.0							IS only present in query Strain.	2. Verify manually, possible false positive caused by consecutive ISs.		b0219	2-oxoglutaramate amidase	-	Intergenic/Pseudo/Repeaed Region	-	-	-	-	4763752.0
1	1						9	310515	1004	1000	6	IS30_IS30	310515	311735.0	NC_000913.3_art_ISs	309514.0	310514.0		311736.0	312736.0	NC_000913.3	299746.0				301747.0	IS only present in query Strain.	1. DLIS	Complete IS hit.	-	Intergenic/Pseudo/Repeaed Region	b0285	aldehyde dehydrogenase; FAD-binding subunit	b0284	aldehyde dehydrogenase: molybdenum cofactor-binding subunit	b0285	aldehyde dehydrogenase; FAD-binding subunit	4763752.0
1	1						10	315801	1005	1000	7	IS30_IS30	315801	317021.0	NC_000913.3_art_ISs	314800.0	315800.0		317022.0	318022.0	NC_000913.3	303811.0				305812.0	IS only present in query Strain.	1. DLIS	Complete IS hit.	-	Intergenic/Pseudo/Repeaed Region	b0290	fimbrial adhesin EcpD	-	Intergenic/Pseudo/Repeaed Region	b0290	fimbrial adhesin EcpD	4763752.0
1	1						11	333734	1006	1000	8	IS30_IS30	333734	334954.0	NC_000913.3_art_ISs	332733.0	333733.0		334955.0	335955.0	NC_000913.3	320523.0				322524.0	IS only present in query Strain.	1. DLIS	Complete IS hit.	b0305	DNA-binding transcriptional activator RclR	b0307	putative amino acid dehydrogenase with NAD(P)-binding domain and ferridoxin-like domain	b0305	DNA-binding transcriptional activator RclR	b0307	putative amino acid dehydrogenase with NAD(P)-binding domain and ferridoxin-like domain	4763752.0
1	1						12	356194	1007	1000	9	IS30_IS30	356194	357414.0	NC_000913.3_art_ISs	355193.0	356193.0		357415.0	358415.0	NC_000913.3	341762.0				343763.0	IS only present in query Strain.	1. DLIS	Complete IS hit.	b0324	putative deaminase with metallo-dependent hydrolase domain	b0325	aldehyde reductase; NADPH-dependent	b0324	putative deaminase with metallo-dependent hydrolase domain	b0325	aldehyde reductase; NADPH-dependent	4763752.0
1	1						13	361260	1008	1000	10	IS30_IS30	361260	362480.0	NC_000913.3_art_ISs	360259.0	361259.0		362481.0	363481.0	NC_000913.3	345607.0				347608.0	IS only present in query Strain.	1. DLIS	Complete IS hit.	b0327	uncharacterized protein YahM	b0330	DNA-binding transcriptional dual regulator PrpR	b0327	uncharacterized protein YahM	b0330	DNA-binding transcriptional dual regulator PrpR	4763752.0
1	1						14	395877	1009	1000	11	IS30_IS30	395877	397097.0	NC_000913.3_art_ISs	394876.0	395876.0		397098.0	398098.0	NC_000913.3	379003.0				381004.0	IS only present in query Strain.	1. DLIS	Complete IS hit.	b0356	S-(hydroxymethyl)glutathione dehydrogenase	-	Intergenic/Pseudo/Repeaed Region	b0356	S-(hydroxymethyl)glutathione dehydrogenase	b4579	putative acyltransferase; N-terminal fragment	4763752.0
1	1						15	398612	1010	1000	12	IS30_IS30	398612	399832.0	NC_000913.3_art_ISs	397611.0	398611.0		399833.0	400833.0	NC_000913.3	380517.0				382518.0	IS only present in query Strain.	1. DLIS	Complete IS hit.	b0358	outer membrane protein YaiO	b0361	IS2 element protein	b0358	outer membrane protein YaiO	b0361	IS2 element protein	4763752.0
1	1						16	458588	1011	1000	13	IS30_IS30	458588	459808.0	NC_000913.3_art_ISs	457587.0	458587.0		459809.0	460809.0	NC_000913.3	439272.0				441273.0	IS only present in query Strain.	1. DLIS	Complete IS hit.	b0420	1-deoxy-D-xylulose-5-phosphate synthase	b0422	exodeoxyribonuclease VII subunit XseB	b0420	1-deoxy-D-xylulose-5-phosphate synthase	b0422	exodeoxyribonuclease VII subunit XseB	4763752.0
1	1						17	515332	1012	1000	14	IS30_IS30	515332	516552.0	NC_000913.3_art_ISs	514331.0	515331.0		516553.0	517553.0	NC_000913.3	494795.0				496796.0	IS only present in query Strain.	1. DLIS	Complete IS hit.	b0472	DNA repair protein RecR	-	Intergenic/Pseudo/Repeaed Region	b0472	DNA repair protein RecR	b0473	chaperone protein HtpG	4763752.0
1	1						18	518331	1013	1000	15	IS30_IS30	518331	519551.0	NC_000913.3_art_ISs	517330.0	518330.0		519552.0	520552.0	NC_000913.3	496573.0				498574.0	IS only present in query Strain.	1. DLIS	Complete IS hit.	-	Intergenic/Pseudo/Repeaed Region	b0475	ferrochelatase	b0473	chaperone protein HtpG	b0475	ferrochelatase	4763752.0
1	1						19	564278	1014	1000	16	IS30_IS30	564278	565498.0	NC_000913.3_art_ISs	563277.0	564277.0		565499.0	566499.0	NC_000913.3	541299.0				543300.0	IS only present in query Strain.	1. DLIS	Complete IS hit.	b0513	putative purine transporter	b0515	(S)-ureidoglycine aminohydrolase	b0513	putative purine transporter	b0515	(S)-ureidoglycine aminohydrolase	4763752.0
1	1						20	638410	1015	1000	17	IS30_IS30	638410	639630.0	NC_000913.3_art_ISs	637409.0	638409.0		639631.0	640631.0	NC_000913.3	614210.0				616211.0	IS only present in query Strain.	1. DLIS	Complete IS hit.	-	Intergenic/Pseudo/Repeaed Region	-	Intergenic/Pseudo/Repeaed Region	b0586	apo-serine activating enzyme	b0586	apo-serine activating enzyme	4763752.0
1	1						21	643571	1016	1000	18	IS30_IS30	643571	644791.0	NC_000913.3_art_ISs	642570.0	643570.0		644792.0	645792.0	NC_000913.3	618150.0				620151.0	IS only present in query Strain.	1. DLIS	Complete IS hit.	-	Intergenic/Pseudo/Repeaed Region	b0588	ferric enterobactin ABC transporter ATP binding subunit	-	Intergenic/Pseudo/Repeaed Region	b0588	ferric enterobactin ABC transporter ATP binding subunit	4763752.0
1	1						22	709250	1017	1000	19	IS30_IS30	709250	710470.0	NC_000913.3_art_ISs	708249.0	709249.0		710471.0	711471.0	NC_000913.3	682608.0				684609.0	IS only present in query Strain.	1. DLIS	Complete IS hit.	b0650	chaperone protein HscC	b0652	glutamate/aspartate ABC transporter ATP binding subunit	b0650	chaperone protein HscC	b0652	glutamate/aspartate ABC transporter ATP binding subunit	4763752.0
1	1						23	780879	1018	1000	20	IS30_IS30	780879	782099.0	NC_000913.3_art_ISs	779878.0	780878.0		782100.0	783100.0	NC_000913.3	753016.0				755017.0	IS only present in query Strain.	1. DLIS	Complete IS hit.	-	Intergenic/Pseudo/Repeaed Region	-	Intergenic/Pseudo/Repeaed Region	-	Intergenic/Pseudo/Repeaed Region	-	Intergenic/Pseudo/Repeaed Region	4763752.0
1	1						24	794533	1019	1000	21	IS30_IS30	794533	795753.0	NC_000913.3_art_ISs	793532.0	794532.0		795754.0	796754.0	NC_000913.3	765449.0				767450.0	IS only present in query Strain.	1. DLIS	Complete IS hit.	b0730	DNA-binding transcriptional repressor MngR	-	Intergenic/Pseudo/Repeaed Region	b0730	DNA-binding transcriptional repressor MngR	b0731	2-O-alpha-mannosyl-D-glycerate specific PTS enzyme II	4763752.0
1	1						25	818746	1020	1000	22	IS30_IS30	818746	819966.0	NC_000913.3_art_ISs	817745.0	818745.0		819967.0	820967.0	NC_000913.3	788441.0				790442.0	IS only present in query Strain.	1. DLIS	Complete IS hit.	b0756	galactose-1-epimerase	b0758	galactose-1-phosphate uridylyltransferase	b0756	galactose-1-epimerase	b0758	galactose-1-phosphate uridylyltransferase	4763752.0
1	1						26	827842	1021	1000	23	IS30_IS30	827842	829062.0	NC_000913.3_art_ISs	826841.0	827841.0		829063.0	830063.0	NC_000913.3	796316.0				798317.0	IS only present in query Strain.	1. DLIS	Complete IS hit.	b0764	molybdate ABC transporter membrane subunit	b0766	pyridoxal phosphate/fructose-1;6-bisphosphate phosphatase	b0764	molybdate ABC transporter membrane subunit	b0766	pyridoxal phosphate/fructose-1;6-bisphosphate phosphatase	4763752.0
1	1						27	840349	1022	1000	24	IS30_IS30	840349	841569.0	NC_000913.3_art_ISs	839348.0	840348.0		841570.0	842570.0	NC_000913.3	807602.0				809603.0	IS only present in query Strain.	1. DLIS	Complete IS hit.	b0773	putative kinase inhibitor	b0775	biotin synthase	b0773	putative kinase inhibitor	b0775	biotin synthase	4763752.0
1	1						28	866245	1023	1000	25	IS30_IS30	866245	867465.0	NC_000913.3_art_ISs	865244.0	866244.0		867466.0	868466.0	NC_000913.3	832277.0				834278.0	IS only present in query Strain.	1. DLIS	Complete IS hit.	-	Intergenic/Pseudo/Repeaed Region	-	Intergenic/Pseudo/Repeaed Region	-	Intergenic/Pseudo/Repeaed Region	b0799	ATP-dependent DNA helicase DinG	4763752.0
1	1						29	885800	1024	1000	26	IS30_IS30	885800	887020.0	NC_000913.3_art_ISs	884799.0	885799.0		887021.0	888021.0	NC_000913.3	850611.0				852612.0	IS only present in query Strain.	1. DLIS	Complete IS hit.	b0814	outer membrane protein X	-	Intergenic/Pseudo/Repeaed Region	b0814	outer membrane protein X	-	Intergenic/Pseudo/Repeaed Region	4763752.0
1	1						30	1054897	1025	1000	27	IS30_IS30	1054897	1056117.0	NC_000913.3_art_ISs	1053896.0	1054896.0		1056118.0	1057118.0	NC_000913.3	1018487.0				1020488.0	IS only present in query Strain.	1. DLIS	Complete IS hit.	b0956	macrodomain Ter protein	b0958	cell division inhibitor SulA	b0956	macrodomain Ter protein	b0958	cell division inhibitor SulA	4763752.0
1	1						31	1102873	1026	1000	28	IS30_IS30	1102873	1104093.0	NC_000913.3_art_ISs	1101872.0	1102872.0		1104094.0	1105094.0	NC_000913.3	1065242.0				1067243.0	IS only present in query Strain.	1. DLIS	Complete IS hit.	b1001	uncharacterized protein YccE	b1004	NAD(P)H:quinone oxidoreductase	b1001	uncharacterized protein YccE	b1004	NAD(P)H:quinone oxidoreductase	4763752.0
1	1						32	1118119	1027	1000	29	IS30_IS30	1118119	1119339.0	NC_000913.3_art_ISs	1117118.0	1118118.0		1119340.0	1120340.0	NC_000913.3	1079267.0				1081268.0	IS only present in query Strain.	1. DLIS	Complete IS hit.	-	Intergenic/Pseudo/Repeaed Region	-	Intergenic/Pseudo/Repeaed Region	-	Intergenic/Pseudo/Repeaed Region	-	Intergenic/Pseudo/Repeaed Region	4763752.0
1	1						33	1150109	1028	1000	30	IS30_IS30	1150109	1151329.0	NC_000913.3_art_ISs	1149108.0	1150108.0		1151330.0	1152330.0	NC_000913.3	1110036.0				1112037.0	IS only present in query Strain.	1. DLIS	Complete IS hit.	b1048	osmoregulated periplasmic glucans (OPGs) biosynthesis protein G	-	Intergenic/Pseudo/Repeaed Region	b1048	osmoregulated periplasmic glucans (OPGs) biosynthesis protein G	b1049	osmoregulated periplasmic glucans (OPGs) biosynthesis protein H	4763752.0
1	1						34	1165669	1029	1000	31	IS30_IS30	1165669	1166889.0	NC_000913.3_art_ISs	1164668.0	1165668.0		1166890.0	1167890.0	NC_000913.3	1124375.0				1126376.0	IS only present in query Strain.	1. DLIS	Complete IS hit.	b1065	multidrug efflux pump MdtH	b1067	DUF480 domain-containing protein YceH	b1065	multidrug efflux pump MdtH	b1067	DUF480 domain-containing protein YceH	4763752.0
1	1						35	1252656	1030	1000	32	IS30_IS30	1252656	1253876.0	NC_000913.3_art_ISs	1251655.0	1252655.0		1253877.0	1254877.0	NC_000913.3	1210141.0				1212142.0	IS only present in query Strain.	1. DLIS	Complete IS hit.	b1158	e14 prophage; site-specific DNA recombinase	-	Intergenic/Pseudo/Repeaed Region	b1158	e14 prophage; site-specific DNA recombinase	-	Intergenic/Pseudo/Repeaed Region	4763752.0
1	1						36	1314729	1031	1000	33	IS30_IS30	1314729	1315949.0	NC_000913.3_art_ISs	1313728.0	1314728.0		1315950.0	1316950.0	NC_000913.3	1270993.0				1272920.0	IS only present in query Strain.	1. DLIS	Complete IS hit.	b1216	Na(+)/K(+):H(+) antiporter ChaA	-	Intergenic/Pseudo/Repeaed Region	b1216	Na(+)/K(+):H(+) antiporter ChaA	b1218	glutathione-specific gamma-glutamylcyclotransferase	4763752.0
1	1						37	1316873	1032	1000	34	IS30_IS30	1316873	1318093.0	NC_000913.3_art_ISs	1315872.0	1316872.0		1318094.0	1319094.0	NC_000913.3	1271993.0				1273917.0	IS only present in query Strain.	1. DLIS	Complete IS hit.	-	Intergenic/Pseudo/Repeaed Region	b1220	putative invasin YchO	-	Intergenic/Pseudo/Repeaed Region	b1220	putative invasin YchO	4763752.0
1	1						38	1332696	1033	1000	35	IS30_IS30	1332696	1333916.0	NC_000913.3_art_ISs	1331695.0	1332695.0		1333917.0	1334917.0	NC_000913.3	1286518.0				1288519.0	IS only present in query Strain.	1. DLIS	Complete IS hit.	b1227	nitrate reductase A subunit gamma	b1232	formyltetrahydrofolate deformylase	b1227	nitrate reductase A subunit gamma	b1232	formyltetrahydrofolate deformylase	4763752.0
1	1						39	1477755	1034	1000	36	IS30_IS30	1477755	1478975.0	NC_000913.3_art_ISs	1476754.0	1477754.0		1478976.0	1479976.0	NC_000913.3	1430356.0				1432357.0	IS only present in query Strain.	1. DLIS	Complete IS hit.	-	Intergenic/Pseudo/Repeaed Region	-	Intergenic/Pseudo/Repeaed Region	b1372	Rac prophage; putative membrane protein	b1372	Rac prophage; putative membrane protein	4763752.0
1	1						40	1530090	1035	1000	37	IS30_IS30	1530090	1531310.0	NC_000913.3_art_ISs	1529089.0	1530089.0		1531311.0	1532311.0	NC_000913.3	1481470.0				1483471.0	IS only present in query Strain.	1. DLIS	Complete IS hit.	b1411	putative phosphatase	b1413	ATP-dependent RNA helicase HrpA	b1411	putative phosphatase	b1413	ATP-dependent RNA helicase HrpA	4763752.0
	1			1			41	1599338	1036	1000	93	IS30_IS30	1599338	1600558.0	NC_000913.3_art_ISs	1598337.0	1599337.0		1600559.0	1601559.0							IS only present in query Strain.	2. Verify manually, possible false positive caused by consecutive ISs.		b1474	formate dehydrogenase N subunit alpha	-	Intergenic/Pseudo/Repeaed Region	-	-	-	-	4763752.0
	1			1			42	1601001	1037	1000	94	IS30_IS30	1601001	1602221.0	NC_000913.3_art_ISs	1600000.0	1601000.0		1602222.0	1603222.0							IS only present in query Strain.	2. Verify manually, possible false positive caused by consecutive ISs.		-	Intergenic/Pseudo/Repeaed Region	b1476	formate dehydrogenase N subunit gamma	-	-	-	-	4763752.0
1	1						43	1614176	1038	1000	38	IS30_IS30	1614176	1615396.0	NC_000913.3_art_ISs	1613175.0	1614175.0		1615397.0	1616397.0	NC_000913.3	1561893.0				1563894.0	IS only present in query Strain.	1. DLIS	Complete IS hit.	b1487	putative D;D-dipeptide ABC transporter periplasmic binding protein	b1489	oxygen-sensing c-di-GMP phosphodiesterase DosP	b1487	putative D;D-dipeptide ABC transporter periplasmic binding protein	b1489	oxygen-sensing c-di-GMP phosphodiesterase DosP	4763752.0
1	1						44	1700984	1039	1000	39	IS30_IS30	1700984	1702204.0	NC_000913.3_art_ISs	1699983.0	1700983.0		1702205.0	1703205.0	NC_000913.3	1647480.0				1649481.0	IS only present in query Strain.	1. DLIS	Complete IS hit.	b1568	Qin prophage; uncharacterized protein YdfX	-	Intergenic/Pseudo/Repeaed Region	b1568	Qin prophage; uncharacterized protein YdfX	-	Intergenic/Pseudo/Repeaed Region	4763752.0
1	1						45	1724977	1040	1000	40	IS30_IS30	1724977	1726197.0	NC_000913.3_art_ISs	1723976.0	1724976.0		1726198.0	1727198.0	NC_000913.3	1670252.0				1672253.0	IS only present in query Strain.	1. DLIS	Complete IS hit.	b1596	putative transporter YnfM	b1598	putative serine protease YdgD	b1596	putative transporter YnfM	b1598	putative serine protease YdgD	4763752.0
1	1						46	1739082	1041	1000	41	IS30_IS30	1739082	1740302.0	NC_000913.3_art_ISs	1738081.0	1739081.0		1740303.0	1741303.0	NC_000913.3	1683136.0				1685137.0	IS only present in query Strain.	1. DLIS	Complete IS hit.	-	Intergenic/Pseudo/Repeaed Region	b1610	DNA replication terminus site-binding protein	b1609	sensory histidine kinase RstB	b1610	DNA replication terminus site-binding protein	4763752.0
1	1						47	1744580	1042	1000	42	IS30_IS30	1744580	1745800.0	NC_000913.3_art_ISs	1743579.0	1744579.0		1745801.0	1746801.0	NC_000913.3	1687413.0				1689414.0	IS only present in query Strain.	1. DLIS	Complete IS hit.	b1612	fumarase A	b1613	mannose-6-phosphate isomerase	b1612	fumarase A	b1613	mannose-6-phosphate isomerase	4763752.0
1	1						48	1763370	1043	1000	43	IS30_IS30	1763370	1764590.0	NC_000913.3_art_ISs	1762369.0	1763369.0		1764591.0	1765591.0	NC_000913.3	1704982.0				1706983.0	IS only present in query Strain.	1. DLIS	Complete IS hit.	b1625	H-NS- and StpA-binding protein	-	Intergenic/Pseudo/Repeaed Region	b1625	H-NS- and StpA-binding protein	b1629	SoxR [2Fe-2S] reducing system protein RsxC	4763752.0
1	1						49	1767126	1044	1000	44	IS30_IS30	1767126	1768346.0	NC_000913.3_art_ISs	1766125.0	1767125.0		1768347.0	1769347.0	NC_000913.3	1707517.0				1709518.0	IS only present in query Strain.	1. DLIS	Complete IS hit.	-	Intergenic/Pseudo/Repeaed Region	b1630	SoxR [2Fe-2S] reducing system protein RsxD	b1629	SoxR [2Fe-2S] reducing system protein RsxC	b1630	SoxR [2Fe-2S] reducing system protein RsxD	4763752.0
1	1						50	1803050	1045	1000	45	IS30_IS30	1803050	1804270.0	NC_000913.3_art_ISs	1802049.0	1803049.0		1804271.0	1805271.0	NC_000913.3	1742220.0				1744221.0	IS only present in query Strain.	1. DLIS	Complete IS hit.	b1661	cyclopropane fatty acyl phospholipid synthase	b1663	multidrug efflux pump MdtK	b1661	cyclopropane fatty acyl phospholipid synthase	b1663	multidrug efflux pump MdtK	4763752.0
	1			1			51	1869279	1046	1000	95	IS30_IS30	1869279	1870499.0	NC_000913.3_art_ISs	1868278.0	1869278.0		1870500.0	1871500.0							IS only present in query Strain.	2. Verify manually, possible false positive caused by consecutive ISs.		b1723	6-phosphofructokinase II	-	Intergenic/Pseudo/Repeaed Region	-	-	-	-	4763752.0
	1			1			52	1870520	1047	1000	96	IS30_IS30	1870520	1871740.0	NC_000913.3_art_ISs	1869519.0	1870519.0		1871741.0	1872741.0							IS only present in query Strain.	2. Verify manually, possible false positive caused by consecutive ISs.		-	Intergenic/Pseudo/Repeaed Region	-	Intergenic/Pseudo/Repeaed Region	-	-	-	-	4763752.0
1	1						53	1904586	1048	1000	46	IS30_IS30	1904586	1905806.0	NC_000913.3_art_ISs	1903585.0	1904585.0		1905807.0	1906807.0	NC_000913.3	1840093.0				1842094.0	IS only present in query Strain.	1. DLIS	Complete IS hit.	b1757	molybdopterin synthase sulfurtransferase	b1760	DUF1496 domain-containing protein YnjH	b1757	molybdopterin synthase sulfurtransferase	b1760	DUF1496 domain-containing protein YnjH	4763752.0
1	1						54	1932848	1049	1000	47	IS30_IS30	1932848	1934068.0	NC_000913.3_art_ISs	1931847.0	1932847.0		1934069.0	1935069.0	NC_000913.3	1867134.0				1869135.0	IS only present in query Strain.	1. DLIS	Complete IS hit.	-	Intergenic/Pseudo/Repeaed Region	b1784	DUF444 domain-containing protein YeaH	b1783	protein kinase YeaG	b1784	DUF444 domain-containing protein YeaH	4763752.0
1	1						55	1937860	1050	1000	48	IS30_IS30	1937860	1939080.0	NC_000913.3_art_ISs	1936859.0	1937859.0		1939081.0	1940081.0	NC_000913.3	1870925.0				1872926.0	IS only present in query Strain.	1. DLIS	Complete IS hit.	b1785	putative c-di-GMP binding protein CdgI	b1786	putative diguanylate cyclase DgcJ	b1785	putative c-di-GMP binding protein CdgI	b1786	putative diguanylate cyclase DgcJ	4763752.0
1	1						56	2146825	1051	1000	49	IS30_IS30	2146825	2148045.0	NC_000913.3_art_ISs	2145824.0	2146824.0		2148046.0	2149046.0	NC_000913.3	2078669.0				2080670.0	IS only present in query Strain.	1. DLIS	Complete IS hit.	b4538	CP4-44 prophage; putative uncharacterized protein YoeF	-	Intergenic/Pseudo/Repeaed Region	b4538	CP4-44 prophage; putative uncharacterized protein YoeF	-	Intergenic/Pseudo/Repeaed Region	4763752.0
1	1						57	2291220	1052	1000	50	IS30_IS30	2291220	2292440.0	NC_000913.3_art_ISs	2290219.0	2291219.0		2292441.0	2293441.0	NC_000913.3	2221843.0				2223844.0	IS only present in query Strain.	1. DLIS	Complete IS hit.	b2132	beta-D-glucoside glucohydrolase; periplasmic	-	Intergenic/Pseudo/Repeaed Region	b2132	beta-D-glucoside glucohydrolase; periplasmic	b2133	D-lactate dehydrogenase	4763752.0
1	1						58	2302324	1053	1000	51	IS30_IS30	2302324	2303544.0	NC_000913.3_art_ISs	2301323.0	2302323.0		2303545.0	2304545.0	NC_000913.3	2231726.0				2233727.0	IS only present in query Strain.	1. DLIS	Complete IS hit.	-	Intergenic/Pseudo/Repeaed Region	b2145	DUF2542 domain-containing protein YeiS	-	Intergenic/Pseudo/Repeaed Region	b2145	DUF2542 domain-containing protein YeiS	4763752.0
1	1						59	2305151	1054	1000	52	IS30_IS30	2305151	2306371.0	NC_000913.3_art_ISs	2304150.0	2305150.0		2306372.0	2307372.0	NC_000913.3	2233332.0				2235333.0	IS only present in query Strain.	1. DLIS	Complete IS hit.	b2144	DUF218 domain-containing protein SanA	b2147	NAD-dependent dihydropyrimidine dehydrogenase subunit PreA	b2144	DUF218 domain-containing protein SanA	b2147	NAD-dependent dihydropyrimidine dehydrogenase subunit PreA	4763752.0
	1			1			60	2314302	1055	1000	97	IS30_IS30	2314302	2315125.0	NC_000913.3_art_ISs	2313301.0	2314301.0		2315126.0	2316126.0							IS only present in query Strain.	2. Verify manually, possible false positive caused by consecutive ISs.	Partial IS hit.	b2151	DNA-binding transcriptional dual regulator GalS	-	Intergenic/Pseudo/Repeaed Region	-	-	-	-	4763752.0
	1			1			61	2315125	1056	1000	98	IS30_IS30	2315125	2315756.0	NC_000913.3_art_ISs	2314124.0	2315124.0		2315757.0	2316757.0							IS only present in query Strain.	2. Verify manually, possible false positive caused by consecutive ISs.	Partial IS hit.	-	Intergenic/Pseudo/Repeaed Region	-	Intergenic/Pseudo/Repeaed Region	-	-	-	-	4763752.0
	1			1			62	2315757	1057	1000	99	IS30_IS30	2315757	2316977.0	NC_000913.3_art_ISs	2314756.0	2315756.0		2316978.0	2317978.0							IS only present in query Strain.	2. Verify manually, possible false positive caused by consecutive ISs.		-	Intergenic/Pseudo/Repeaed Region	-	Intergenic/Pseudo/Repeaed Region	-	-	-	-	4763752.0
1	1						63	2331004	1058	1000	53	IS30_IS30	2331004	2332224.0	NC_000913.3_art_ISs	2330003.0	2331003.0		2332225.0	2333225.0	NC_000913.3	2254301.0				2256302.0	IS only present in query Strain.	1. DLIS	Complete IS hit.	b2162	pyrimidine-specific ribonucleoside hydrolase RihB	b2164	putative pseudouridine transporter	b2162	pyrimidine-specific ribonucleoside hydrolase RihB	b2164	putative pseudouridine transporter	4763752.0
1	1						64	2338335	1059	1000	54	IS30_IS30	2338335	2339555.0	NC_000913.3_art_ISs	2337334.0	2338334.0		2339556.0	2340556.0	NC_000913.3	2260411.0				2262412.0	IS only present in query Strain.	1. DLIS	Complete IS hit.	b2167	fructose-specific PTS multiphosphoryl transfer protein FruA	b2169	fructose-specific PTS multiphosphoryl transfer protein FruB	b2167	fructose-specific PTS multiphosphoryl transfer protein FruA	b2169	fructose-specific PTS multiphosphoryl transfer protein FruB	4763752.0
1	1						65	2415048	1060	1000	55	IS30_IS30	2415048	2416268.0	NC_000913.3_art_ISs	2414047.0	2415047.0		2416269.0	2417269.0	NC_000913.3	2335903.0				2337904.0	IS only present in query Strain.	1. DLIS	Complete IS hit.	b2230	DUF2138 domain-containing protein YfaA	-	Intergenic/Pseudo/Repeaed Region	b2230	DUF2138 domain-containing protein YfaA	b2231	DNA gyrase subunit A	4763752.0
1	1						66	2462961	1061	1000	56	IS30_IS30	2462961	2464181.0	NC_000913.3_art_ISs	2461960.0	2462960.0		2464182.0	2465182.0	NC_000913.3	2382595.0				2384596.0	IS only present in query Strain.	1. DLIS	Complete IS hit.	-	Intergenic/Pseudo/Repeaed Region	b2270	IPR002035/DUF3520 domain-containing protein YfbK	-	Intergenic/Pseudo/Repeaed Region	b2270	IPR002035/DUF3520 domain-containing protein YfbK	4763752.0
1	1						67	2528130	1062	1000	57	IS30_IS30	2528130	2529350.0	NC_000913.3_art_ISs	2527129.0	2528129.0		2529351.0	2530351.0	NC_000913.3	2446543.0				2448544.0	IS only present in query Strain.	1. DLIS	Complete IS hit.	b2329	chorismate synthase	-	Intergenic/Pseudo/Repeaed Region	b2329	chorismate synthase	-	Intergenic/Pseudo/Repeaed Region	4763752.0
[truncated: 1,172 more rows]

## Sheet: Sme
Table S2. Results of the comparison of E. meliloti strain 1021 as reference genome and an artificial E. meliloti 2011 genome with 100 ISRm5 random insertions as query, using different surroundingLen values.
[truncated: 2,463 more rows]

[truncated: 1 more sheets: Summary]
